# Supplementary material for: Single-cell CRISPR screening characterizes transcriptional deregulation in T-cell acute lymphoblastic leukemia
Source: Research Square preprint supplement (doi:10.21203/rs.3.rs-2615765/v2), 2023-12-21
Supplement: Supplementary file 1 [file 5effd9824a740a8b8eff5273.pdf]

**Declaration of interests**

- ✓  The authors declare that they have no known competing financial interests or personal relationships that could have appeared to influence the work reported in this paper.

The authors declare the following financial interests/personal relationships which may be considered as potential competing interests:

**Conflict of interest**

The authors declare that they have no conflict of interest.
