# Supplementary material for: Single-cell CRISPR screening characterizes transcriptional deregulation in T-cell acute lymphoblastic leukemia
Source: Research Square preprint supplement (doi:10.21203/rs.3.rs-2615765/v2), 2023-12-21
Supplement: Supplementary file 1 [file 72cb38ce8b5e372df1d77c4a.xlsx]

## Sheet: Bcl11b_vs_Ctrl
	gene	baseMean	log2FoldChange	lfcSE	stat	pvalue	padj
ENSMUSG00000049103	Ccr2	2118.91	3.98191	0.175064	22.7455	1.58898e-114	2.64915e-110
ENSMUSG00000032220	Myo1e	276.953	4.32472	0.261597	16.532	2.15964e-61	1.80028e-57
ENSMUSG00000045349	Sh2d5	977.567	-2.45704	0.15657	-15.693	1.68988e-55	9.39121e-52
ENSMUSG00000026879	Gsn	1359.9	2.05886	0.131416	15.6668	2.55154e-55	1.06348e-51
ENSMUSG00000054892	Txk	981.157	2.44701	0.166539	14.6933	7.11788e-49	2.37339e-45
ENSMUSG00000089929	Bcl2a1b	502.662	8.48107	0.578451	14.6617	1.13428e-48	3.15178e-45
ENSMUSG00000074607	Tox2	232.01	3.89536	0.269238	14.4681	1.92787e-47	4.59163e-44
ENSMUSG00000037548	H2-DMb2	482.918	4.01464	0.279217	14.3782	7.0879e-47	1.47712e-43
ENSMUSG00000030579	Tyrobp	1921.19	2.6468	0.184856	14.3182	1.68549e-46	3.12228e-43
ENSMUSG00000055435	Maf	509.618	3.54596	0.250344	14.1644	1.52247e-45	2.53827e-42
ENSMUSG00000020176	Grb10	248.598	3.25769	0.231099	14.0965	3.9919e-45	6.05027e-42
ENSMUSG00000058715	Fcer1g	1327.81	2.17469	0.156905	13.86	1.1074e-43	1.53855e-40
ENSMUSG00000045763	Basp1	2764.49	2.27046	0.165572	13.7128	8.50976e-43	1.09134e-39
ENSMUSG00000015619	Gata3	2401.45	1.59681	0.118734	13.4487	3.13405e-41	3.73221e-38
ENSMUSG00000020689	Itgb3	559.092	3.50507	0.266281	13.163	1.43237e-39	1.59203e-36
ENSMUSG00000044265	E030002O03Rik	641.724	-3.04709	0.235987	-12.9121	3.84545e-38	4.00696e-35
ENSMUSG00000019256	Ahr	439.888	3.16041	0.247783	12.7548	2.93301e-37	2.87642e-34
ENSMUSG00000023132	Gzma	8912.16	1.67722	0.133363	12.5763	2.84913e-36	2.63893e-33
ENSMUSG00000073421	H2-Ab1	2979.68	6.17459	0.494965	12.4748	1.02465e-35	8.99107e-33
ENSMUSG00000036594	H2-Aa	4914.03	6.10772	0.49234	12.4055	2.44024e-35	2.03418e-32
ENSMUSG00000032679	Cd59a	1190.42	-1.8259	0.148642	-12.2839	1.10525e-34	8.77462e-32
ENSMUSG00000025351	Cd63	366.176	2.40381	0.196468	12.2351	2.0187e-34	1.52981e-31
ENSMUSG00000026573	Xcl1	1113.18	7.26942	0.607773	11.9608	5.70442e-33	3.96267e-30
ENSMUSG00000038172	Ttc39b	369.255	2.55526	0.213575	11.9642	5.47215e-33	3.96267e-30
ENSMUSG00000028965	Tnfrsf9	1575.23	5.77237	0.482945	11.9524	6.30529e-33	4.20487e-30
ENSMUSG00000032238	Rora	2936.46	1.98531	0.168195	11.8036	3.73919e-32	2.39768e-29
ENSMUSG00000034394	Lif	282.359	3.31498	0.282748	11.7241	9.58944e-32	5.9213e-29
ENSMUSG00000025432	Avil	849.894	8.89661	0.762288	11.6709	1.79457e-31	1.06854e-28
ENSMUSG00000016494	Cd34	1115.89	-1.84805	0.159107	-11.6152	3.44974e-31	1.98324e-28
ENSMUSG00000005800	Mmp8	184.552	5.10072	0.440867	11.5697	5.86602e-31	3.25994e-28
ENSMUSG00000026070	Il18r1	468.058	2.75927	0.242156	11.3946	4.44813e-30	2.31748e-27
ENSMUSG00000059498	Fcgr3	179.333	3.26784	0.286788	11.3946	4.44683e-30	2.31748e-27
ENSMUSG00000045827	Serpinb9	647.352	2.84949	0.250762	11.3633	6.36592e-30	3.21614e-27
ENSMUSG00000024451	Arap3	117.518	4.19019	0.369022	11.3548	7.01653e-30	3.44058e-27
ENSMUSG00000079547	H2-DMb1	202.889	3.52693	0.311064	11.3383	8.47716e-30	4.03804e-27
ENSMUSG00000047798	Cd300lf	125.916	4.41666	0.392441	11.2543	2.2051e-29	1.02121e-26
ENSMUSG00000028339	Col15a1	256.449	2.9087	0.260054	11.185	4.8302e-29	2.17646e-26
ENSMUSG00000026826	Nr4a2	266.923	3.06099	0.274588	11.1476	7.35821e-29	3.22832e-26
ENSMUSG00000100150	Gm19585	237.855	3.7642	0.33833	11.1258	9.39397e-29	4.0158e-26
ENSMUSG00000024610	Cd74	3277.24	5.92393	0.540227	10.9656	5.59143e-28	2.33051e-25
ENSMUSG00000024621	Csf1r	121.16	4.55197	0.41704	10.915	9.77762e-28	3.97591e-25
ENSMUSG00000045761	Fam179a	94.2448	5.02792	0.461514	10.8944	1.22572e-27	4.86551e-25
ENSMUSG00000026009	Icos	307.022	3.43879	0.315982	10.8829	1.39137e-27	5.39463e-25
ENSMUSG00000017466	Timp2	1052.57	1.87143	0.174587	10.7192	8.27408e-27	3.13512e-24
ENSMUSG00000060586	H2-Eb1	3055.51	5.95592	0.556027	10.7116	8.98166e-27	3.3276e-24
ENSMUSG00000021196	Pfkp	484.032	2.41843	0.227396	10.6353	2.04203e-26	7.40103e-24
ENSMUSG00000049775	Tmsb4x	37098.5	1.55629	0.148086	10.5094	7.81953e-26	2.77377e-23
ENSMUSG00000031780	Ccl17	945.744	11.5654	1.10445	10.4717	1.16531e-25	4.0475e-23
ENSMUSG00000044252	Osbpl1a	780.677	-1.86479	0.178513	-10.4463	1.52412e-25	5.18574e-23
ENSMUSG00000030108	Slc6a13	160.753	3.19094	0.306939	10.396	2.58547e-25	8.621e-23
ENSMUSG00000091191	Gm17334	487.276	1.87234	0.181597	10.3105	6.31985e-25	2.06597e-22
ENSMUSG00000064262	Gimap8	257.01	2.74107	0.266784	10.2745	9.18457e-25	2.94471e-22
ENSMUSG00000048583	Igf2	4351.37	-1.58544	0.155725	-10.181	2.41023e-24	7.58178e-22
ENSMUSG00000026721	Rabgap1l	2958.52	-1.04149	0.10255	-10.1559	3.11914e-24	9.63005e-22
ENSMUSG00000038893	Fam117a	959.726	-1.81383	0.179845	-10.0855	6.40206e-24	1.90598e-21
ENSMUSG00000054072	Iigp1	881.576	4.94419	0.49018	10.0865	6.34055e-24	1.90598e-21
ENSMUSG00000003283	Hck	146.088	4.39752	0.437746	10.0458	9.5838e-24	2.80318e-21
ENSMUSG00000024109	Nrxn1	343.081	-2.0361	0.204259	-9.96824	2.09916e-23	6.03399e-21
ENSMUSG00000025804	Ccr1	120.097	5.05247	0.508658	9.93295	2.99255e-23	8.45624e-21
ENSMUSG00000015355	Cd48	1650.1	-1.10315	0.111459	-9.89734	4.27474e-23	1.18781e-20
ENSMUSG00000056749	Nfil3	162.169	3.48424	0.352605	9.88145	5.01049e-23	1.36942e-20
ENSMUSG00000021880	Rnase6	141.059	4.54306	0.460234	9.87118	5.55069e-23	1.4926e-20
ENSMUSG00000034652	Cd300a	143.309	3.86931	0.393941	9.82206	9.04779e-23	2.39436e-20
ENSMUSG00000039315	Clnk	173.411	3.09348	0.315599	9.80192	1.10464e-22	2.8776e-20
ENSMUSG00000002900	Lamb1	90.3133	4.27146	0.439868	9.71079	2.71232e-22	6.9569e-20
ENSMUSG00000022667	Cd200r1	161.118	3.62633	0.374479	9.68367	3.53799e-22	8.93717e-20
ENSMUSG00000028266	Lmo4	1513.72	1.0482	0.108706	9.64255	5.28606e-22	1.31536e-19
ENSMUSG00000003573	Homer3	663.647	-1.47591	0.153793	-9.59669	8.25553e-22	2.00398e-19
ENSMUSG00000043505	Gimap5	789.975	1.4383	0.149882	9.59621	8.29384e-22	2.00398e-19
ENSMUSG00000069874	Irgm2	572.863	1.56533	0.163558	9.57051	1.06381e-21	2.5337e-19
ENSMUSG00000034664	Itga2b	598.616	2.03376	0.213048	9.54604	1.34746e-21	3.16406e-19
ENSMUSG00000022504	Ciita	156.575	3.99315	0.419223	9.52511	1.64862e-21	3.81748e-19
ENSMUSG00000102418	Sh2d1b1	100.577	4.5637	0.481094	9.48609	2.39854e-21	5.47787e-19
ENSMUSG00000028758	Kif17	164.113	-2.63954	0.279434	-9.44605	3.51861e-21	7.92734e-19
ENSMUSG00000021281	Tnfaip2	96.2435	5.22534	0.553916	9.43346	3.96781e-21	8.82018e-19
ENSMUSG00000001175	Calm1	14046.1	1.13862	0.120913	9.4169	4.64613e-21	1.01921e-18
ENSMUSG00000038668	Lpar1	89.6292	6.35441	0.675594	9.40567	5.17011e-21	1.11943e-18
ENSMUSG00000060550	H2-Q7	1183.55	1.41803	0.150849	9.40029	5.4411e-21	1.163e-18
ENSMUSG00000058755	Osm	495.524	1.63407	0.174066	9.38765	6.13536e-21	1.27861e-18
ENSMUSG00000062082	Cd200r4	343.292	7.57126	0.806463	9.38824	6.10121e-21	1.27861e-18
ENSMUSG00000016498	Pdcd1lg2	99.6257	5.49518	0.587878	9.34748	8.97579e-21	1.80294e-18
ENSMUSG00000018927	Ccl6	283.501	3.00515	0.321413	9.34979	8.78187e-21	1.80294e-18
ENSMUSG00000043099	Hic1	97.4012	3.99436	0.427275	9.34847	8.89269e-21	1.80294e-18
ENSMUSG00000039852	Rere	2001.39	-1.13446	0.121542	-9.33389	1.02054e-20	2.02552e-18
ENSMUSG00000032231	Anxa2	897.643	1.73364	0.185898	9.32573	1.10217e-20	2.16181e-18
ENSMUSG00000022010	Tsc22d1	2009.27	-1.11474	0.11997	-9.2918	1.51706e-20	2.94098e-18
ENSMUSG00000030208	Emp1	371.952	-1.75948	0.189447	-9.28745	1.58026e-20	3.02829e-18
ENSMUSG00000021200	Asb2	818.621	4.79643	0.518141	9.25699	2.10268e-20	3.93887e-18
ENSMUSG00000021892	Sh3bp5	847.424	-1.38056	0.149123	-9.25789	2.08518e-20	3.93887e-18
ENSMUSG00000078853	Igtp	1168.79	1.36942	0.14929	9.17285	4.60669e-20	8.53364e-18
ENSMUSG00000052087	Rgs14	142.213	3.06311	0.334175	9.16619	4.90048e-20	8.97811e-18
ENSMUSG00000032380	Dapk2	79.6152	4.89169	0.534909	9.14489	5.96898e-20	1.08168e-17
ENSMUSG00000020407	Upp1	292.007	2.57744	0.282151	9.13494	6.54427e-20	1.17318e-17
ENSMUSG00000071716	Apol7e	98.1595	3.90946	0.42885	9.11615	7.78424e-20	1.38063e-17
ENSMUSG00000048612	Myof	240.684	-2.07721	0.227894	-9.11481	7.88112e-20	1.3831e-17
ENSMUSG00000050272	Dscam	139.735	3.62778	0.398612	9.10102	8.94884e-20	1.55411e-17
ENSMUSG00000035042	Ccl5	2117.11	1.44816	0.159679	9.06918	1.1992e-19	2.06114e-17
ENSMUSG00000054435	Gimap4	422.457	4.95988	0.546983	9.06771	1.21548e-19	2.06781e-17
ENSMUSG00000030154	Klrb1f	733.632	1.51325	0.16693	9.06515	1.24428e-19	2.09542e-17
ENSMUSG00000030165	Klrd1	522.509	4.20056	0.463946	9.054	1.3783e-19	2.29791e-17
ENSMUSG00000058013	2011-09-01	1283.31	1.09699	0.121423	9.03449	1.6477e-19	2.71984e-17
ENSMUSG00000030589	Rasgrp4	179.34	2.91713	0.322998	9.0314	1.69491e-19	2.77034e-17
ENSMUSG00000032265	Fam46a	174.414	3.52525	0.392023	8.99247	2.41745e-19	3.91299e-17
ENSMUSG00000016933	Plcg1	1541.61	-1.46702	0.163367	-8.97991	2.70999e-19	4.34432e-17
ENSMUSG00000037940	Inpp4b	383.284	2.19716	0.244985	8.96852	3.00512e-19	4.77155e-17
ENSMUSG00000018899	Irf1	2700.68	1.10515	0.123452	8.9521	3.48774e-19	5.48563e-17
ENSMUSG00000030148	Clec4a2	82.2728	5.36617	0.600023	8.94326	3.77839e-19	5.88722e-17
ENSMUSG00000020841	Cpd	180.748	2.93631	0.32912	8.92171	4.59163e-19	7.08811e-17
ENSMUSG00000023150	Ivns1abp	6088.54	1.02046	0.11465	8.9006	5.55441e-19	8.49569e-17
ENSMUSG00000062604	Srpk2	2460.42	-0.90081	0.101558	-8.86993	7.31941e-19	1.10936e-16
ENSMUSG00000003949	Hlf	79.9732	6.12868	0.695844	8.80756	1.27901e-18	1.92105e-16
ENSMUSG00000044162	Tnip3	156.348	3.70015	0.421714	8.77407	1.72326e-18	2.5652e-16
ENSMUSG00000020644	Id2	6289.17	3.13959	0.359484	8.73359	2.46709e-18	3.63994e-16
ENSMUSG00000030786	Itgam	414.311	2.21938	0.254158	8.73228	2.49593e-18	3.65019e-16
ENSMUSG00000000861	Bcl11a	927.419	1.6622	0.191172	8.6948	3.47442e-18	5.037e-16
ENSMUSG00000069833	Ahnak	644.95	3.93186	0.452421	8.69071	3.60172e-18	5.17654e-16
ENSMUSG00000060509	Xcr1	88.896	4.02349	0.463076	8.68861	3.6689e-18	5.22802e-16
ENSMUSG00000000078	Klf6	1512.33	1.65173	0.190815	8.65618	4.87848e-18	6.89271e-16
ENSMUSG00000004730	Adgre1	185.413	3.35583	0.389115	8.62425	6.45124e-18	9.03825e-16
ENSMUSG00000041390	Mdfic	593.864	1.90772	0.221256	8.62225	6.56501e-18	9.12099e-16
ENSMUSG00000005417	Mprip	934.942	-1.14727	0.133215	-8.61218	7.16852e-18	9.87715e-16
ENSMUSG00000026970	Rbms1	3771.05	0.797001	0.0930569	8.56467	1.0839e-17	1.48121e-15
ENSMUSG00000034028	Cd226	87.5411	4.88845	0.571864	8.54827	1.24946e-17	1.69358e-15
ENSMUSG00000024675	Ms4a4c	206.545	5.81595	0.6835	8.50907	1.7534e-17	2.35748e-15
ENSMUSG00000003617	Cp	61.6685	4.79441	0.564133	8.49872	1.91698e-17	2.55679e-15
ENSMUSG00000031779	Ccl22	1115.48	9.67211	1.13842	8.49607	1.96124e-17	2.59506e-15
ENSMUSG00000028793	Rnf19b	1167.61	1.34226	0.15846	8.47063	2.44063e-17	3.20395e-15
ENSMUSG00000026418	Tnni1	103.209	10.2104	1.21455	8.40676	4.21481e-17	5.48979e-15
ENSMUSG00000023349	Clec4n	664.367	8.54906	1.0186	8.39297	4.7401e-17	6.12612e-15
ENSMUSG00000021831	Ero1l	379.834	2.14208	0.255512	8.38345	5.13966e-17	6.59142e-15
ENSMUSG00000033545	Znrf1	1967.59	-0.843094	0.100588	-8.38167	5.21831e-17	6.60011e-15
ENSMUSG00000073409	H2-Q6	321.015	1.95457	0.2332	8.3815	5.22561e-17	6.60011e-15
ENSMUSG00000021453	Gadd45g	269.33	2.28618	0.272839	8.37925	5.32655e-17	6.67702e-15
ENSMUSG00000090160	4930480K15Rik	202.725	-2.13487	0.255744	-8.34769	6.96084e-17	8.66053e-15
ENSMUSG00000027514	Zbp1	116.627	2.89041	0.347499	8.31774	8.96576e-17	1.10724e-14
ENSMUSG00000035877	Zhx3	439.886	-1.42818	0.171833	-8.31146	9.4534e-17	1.15888e-14
ENSMUSG00000040229	Gpr34	150.522	2.84397	0.342849	8.2951	1.08498e-16	1.32034e-14
ENSMUSG00000033713	Foxn3	929.266	-1.18698	0.143554	-8.26855	1.35603e-16	1.63824e-14
ENSMUSG00000016256	Ctsz	529.057	2.13419	0.258527	8.25518	1.51679e-16	1.8133e-14
ENSMUSG00000030325	Klrb1c	116.302	3.70453	0.448778	8.25471	1.52269e-16	1.8133e-14
ENSMUSG00000075602	Ly6a	2704.3	1.46216	0.177737	8.22652	1.9273e-16	2.27886e-14
ENSMUSG00000000290	Itgb2	662.777	1.5349	0.186654	8.22326	1.98048e-16	2.30899e-14
ENSMUSG00000015437	Gzmb	3553.76	1.35881	0.165229	8.22379	1.97165e-16	2.30899e-14
ENSMUSG00000034152	Exoc3	559.855	1.93118	0.235589	8.19722	2.46001e-16	2.84814e-14
ENSMUSG00000069516	Lyz2	422.259	2.21936	0.271083	8.18703	2.67758e-16	3.07867e-14
ENSMUSG00000003534	Ddr1	73.917	6.5104	0.797301	8.16555	3.19984e-16	3.6291e-14
ENSMUSG00000029816	Gpnmb	112.684	4.0069	0.490663	8.16629	3.18016e-16	3.6291e-14
ENSMUSG00000015937	H2afy	16050.1	-0.748615	0.0919775	-8.13911	3.9819e-16	4.47237e-14
ENSMUSG00000026249	Serpine2	210.454	2.81927	0.346405	8.13865	3.99702e-16	4.47237e-14
ENSMUSG00000051285	Pcmtd1	1863.9	-0.899416	0.110595	-8.13255	4.20369e-16	4.67226e-14
ENSMUSG00000032350	Gclc	1600.85	1.19359	0.146789	8.13131	4.24669e-16	4.68879e-14
ENSMUSG00000030342	Cd9	345.691	1.8381	0.226521	8.1145	4.87788e-16	5.35027e-14
ENSMUSG00000068606	Gm4841	58.3016	5.66303	0.698285	8.10991	5.06575e-16	5.52001e-14
ENSMUSG00000040856	Dlk1	61.2054	3.97113	0.489722	8.10895	5.10579e-16	5.52751e-14
ENSMUSG00000026950	Neb	184.077	2.74577	0.338774	8.10503	5.27343e-16	5.67217e-14
ENSMUSG00000026483	Fam129a	527.163	1.71908	0.212242	8.09962	5.51321e-16	5.89206e-14
ENSMUSG00000049037	Clec4a1	174.475	10.0064	1.23777	8.08421	6.25703e-16	6.64441e-14
ENSMUSG00000036478	Btg1	784.662	1.72675	0.214189	8.06179	7.51856e-16	7.93351e-14
ENSMUSG00000021728	Emb	2207.09	2.48907	0.309376	8.04546	8.59231e-16	9.00949e-14
ENSMUSG00000037649	H2-DMa	612.843	1.8288	0.227653	8.03328	9.49039e-16	9.88899e-14
ENSMUSG00000069792	Wfdc17	96.8645	3.63613	0.453465	8.01854	1.07009e-15	1.10811e-13
ENSMUSG00000073010	Gm5127	77.5079	3.68265	0.459423	8.01581	1.09412e-15	1.126e-13
ENSMUSG00000040264	Gbp2b	60.6363	6.26215	0.781733	8.0106	1.14146e-15	1.16751e-13
ENSMUSG00000030789	Itgax	564.134	1.90556	0.237976	8.00734	1.17215e-15	1.1916e-13
ENSMUSG00000015340	Cybb	319.685	4.87719	0.609502	8.00193	1.22484e-15	1.23761e-13
ENSMUSG00000066684	Pilrb1	61.2069	4.36088	0.549296	7.93902	2.0378e-15	2.04664e-13
ENSMUSG00000041515	Irf8	454.345	1.75535	0.221155	7.93722	2.0677e-15	2.06424e-13
ENSMUSG00000031827	Cotl1	1643.55	1.16782	0.147148	7.93635	2.08214e-15	2.06627e-13
ENSMUSG00000037922	Bank1	49.6499	4.92928	0.622249	7.92173	2.34237e-15	2.31077e-13
ENSMUSG00000005054	Cstb	831.004	1.08521	0.137552	7.88943	3.03581e-15	2.97723e-13
ENSMUSG00000028108	Ecm1	109.531	3.44978	0.438084	7.87469	3.41601e-15	3.33051e-13
ENSMUSG00000033032	Afap1l1	142.426	-2.37995	0.302446	-7.86901	3.57463e-15	3.4649e-13
ENSMUSG00000105519	RP24-230J14.8	726.49	-1.25338	0.159518	-7.85728	3.92568e-15	3.78317e-13
ENSMUSG00000036499	Eea1	621.963	1.57936	0.201577	7.83502	4.6876e-15	4.49148e-13
ENSMUSG00000042751	Nmnat2	48.0767	5.42506	0.694179	7.81508	5.49266e-15	5.23278e-13
ENSMUSG00000043091	Tuba1c	1131.61	1.02924	0.131948	7.80037	6.17254e-15	5.84708e-13
ENSMUSG00000046844	Vat1l	160.602	-3.01254	0.386474	-7.79494	6.44396e-15	6.0697e-13
ENSMUSG00000039062	Anpep	60.0617	6.54453	0.841173	7.78025	7.23829e-15	6.7796e-13
ENSMUSG00000026069	Il1rl1	60.2193	4.62322	0.594481	7.7769	7.43217e-15	6.9223e-13
ENSMUSG00000030122	Ptms	270.33	2.32258	0.299785	7.74749	9.37261e-15	8.68112e-13
ENSMUSG00000044258	Ctla2a	3085.46	-1.18569	0.15318	-7.74049	9.90348e-15	9.12215e-13
ENSMUSG00000063286	Gm8995	3209.49	-0.763672	0.0989354	-7.7189	1.17337e-14	1.07486e-12
ENSMUSG00000027639	Samhd1	1201.25	1.57388	0.204028	7.71403	1.21902e-14	1.11058e-12
ENSMUSG00000023927	Satb1	2712.82	-0.916768	0.119373	-7.67983	1.59295e-14	1.44335e-12
ENSMUSG00000048852	Gm12185	105.401	2.68035	0.349446	7.67029	1.71607e-14	1.54651e-12
ENSMUSG00000059108	Ifitm6	75.5174	3.58019	0.46694	7.66736	1.75578e-14	1.57378e-12
ENSMUSG00000000562	Adora3	104.061	3.49072	0.455588	7.662	1.83053e-14	1.63201e-12
ENSMUSG00000024899	Papss2	90.7908	2.95121	0.385339	7.65874	1.8776e-14	1.66508e-12
ENSMUSG00000025746	Il6	106.169	3.41896	0.446455	7.658	1.88847e-14	1.66585e-12
ENSMUSG00000040111	Gramd1b	1000.38	1.11062	0.145569	7.62953	2.35614e-14	2.06745e-12
ENSMUSG00000079186	Gzmc	574.075	7.66436	1.00486	7.62726	2.39789e-14	2.09307e-12
ENSMUSG00000005763	Cd247	1016.49	-1.10008	0.144307	-7.6232	2.4746e-14	2.14878e-12
ENSMUSG00000002897	Il17ra	1920.69	-0.952547	0.125035	-7.61826	2.57124e-14	2.22113e-12
ENSMUSG00000086470	Gm12580	63.9548	9.52152	1.25075	7.61267	2.68482e-14	2.30729e-12
ENSMUSG00000032011	Thy1	359.563	1.50369	0.19777	7.60322	2.88848e-14	2.46958e-12
ENSMUSG00000020027	Socs2	2898.68	-0.791158	0.104075	-7.6018	2.92047e-14	2.48419e-12
ENSMUSG00000066363	Serpina3f	183.183	2.28711	0.302114	7.57034	3.72238e-14	3.15023e-12
ENSMUSG00000031897	Psmb10	1251.95	0.922047	0.121941	7.56139	3.98794e-14	3.35793e-12
ENSMUSG00000052837	Junb	1247.53	1.18588	0.156921	7.55718	4.11909e-14	3.45093e-12
ENSMUSG00000035711	Dok3	158.038	2.23665	0.296834	7.535	4.88335e-14	4.07076e-12
ENSMUSG00000028434	Epb4.1l4b	826.64	-1.59205	0.212239	-7.50125	6.32138e-14	5.21733e-12
ENSMUSG00000028759	Hp1bp3	6061.63	-0.734121	0.0978599	-7.50175	6.29702e-14	5.21733e-12
ENSMUSG00000009350	Mpo	274.095	-5.12476	0.684208	-7.49006	6.8844e-14	5.65402e-12
ENSMUSG00000036172	Cd200r3	161.765	10.8593	1.45903	7.44282	9.85588e-14	8.05477e-12
ENSMUSG00000053641	Dennd4a	453.292	1.43746	0.193153	7.44207	9.9122e-14	8.06128e-12
ENSMUSG00000063077	Kif1b	61.1377	5.45696	0.733483	7.43979	1.00844e-13	8.16149e-12
ENSMUSG00000032092	Mpzl2	211.622	-2.08453	0.280312	-7.43646	1.0342e-13	8.28948e-12
ENSMUSG00000046006	Gapt	75.8495	3.15943	0.424849	7.43658	1.03324e-13	8.28948e-12
ENSMUSG00000001444	Tbx21	90.699	8.16144	1.09999	7.41954	1.17524e-13	9.37492e-12
ENSMUSG00000022106	Rcbtb2	2011.74	0.874734	0.117974	7.41466	1.21935e-13	9.68045e-12
ENSMUSG00000079293	Clec7a	200.365	5.75353	0.780209	7.37433	1.65169e-13	1.30507e-11
ENSMUSG00000031480	Thsd1	215.982	-1.88021	0.255231	-7.3667	1.74907e-13	1.37549e-11
ENSMUSG00000016283	H2-M2	95.443	9.13523	1.24334	7.34734	2.02188e-13	1.58257e-11
ENSMUSG00000027398	Il1b	732.117	10.5294	1.43874	7.31847	2.50823e-13	1.95408e-11
ENSMUSG00000040430	Pitpnc1	3682.39	-0.945172	0.129652	-7.29005	3.0985e-13	2.40271e-11
ENSMUSG00000040204	2810417H13Rik	3319.77	0.67828	0.0930788	7.28716	3.16556e-13	2.44334e-11
ENSMUSG00000034640	Tiparp	531.222	1.60004	0.219753	7.2811	3.31118e-13	2.54396e-11
ENSMUSG00000030156	Cd69	532.178	1.43245	0.196811	7.27829	3.38081e-13	2.58555e-11
ENSMUSG00000068566	Myadm	220.249	2.56931	0.353228	7.27381	3.49484e-13	2.66055e-11
ENSMUSG00000053175	Bcl3	128.135	2.63161	0.361973	7.27018	3.59018e-13	2.7207e-11
ENSMUSG00000052730	Gm5111	282.825	-1.49489	0.205644	-7.26933	3.61275e-13	2.72542e-11
ENSMUSG00000068036	Mllt4	420.387	1.5079	0.207752	7.25821	3.92253e-13	2.94578e-11
ENSMUSG00000055022	Cntn1	258.466	2.12413	0.292684	7.25742	3.9454e-13	2.94967e-11
ENSMUSG00000032717	Mdfi	252.377	-1.89421	0.2612	-7.25196	4.10786e-13	3.05742e-11
ENSMUSG00000020346	Mgat1	1099.43	-1.05359	0.145312	-7.25056	4.15053e-13	3.07545e-11
ENSMUSG00000025225	Nfkb2	269.479	2.03786	0.281138	7.2486	4.21107e-13	3.1065e-11
ENSMUSG00000016496	Cd274	203.703	2.48076	0.342626	7.24042	4.47291e-13	3.28512e-11
ENSMUSG00000028967	Errfi1	66.2725	3.98552	0.551317	7.22909	4.86231e-13	3.55545e-11
ENSMUSG00000079197	Psme2	1243.12	1.10099	0.152334	7.22744	4.92167e-13	3.58315e-11
ENSMUSG00000041481	Serpina3g	1048.49	1.51043	0.209032	7.22581	4.98113e-13	3.61067e-11
ENSMUSG00000028268	Gbp3	388.058	1.49596	0.2071	7.2234	5.07054e-13	3.65957e-11
ENSMUSG00000026833	Olfm1	114.401	10.3596	1.4363	7.21268	5.48624e-13	3.94252e-11
ENSMUSG00000026866	Kynu	107.249	3.03716	0.421292	7.20916	5.63001e-13	4.02848e-11
ENSMUSG00000022744	Cldnd1	563.205	1.54919	0.215229	7.19786	6.11629e-13	4.35773e-11
ENSMUSG00000046985	Tapt1	1076.62	-1.02091	0.141965	-7.19128	6.41867e-13	4.55371e-11
ENSMUSG00000032841	Prr5l	49.2025	4.50427	0.626498	7.1896	6.49794e-13	4.57104e-11
ENSMUSG00000053101	Gpr141	840.637	0.913307	0.127026	7.18992	6.48301e-13	4.57104e-11
ENSMUSG00000041782	Lad1	53.884	9.27449	1.29486	7.16254	7.91936e-13	5.54755e-11
ENSMUSG00000022747	St3gal6	96.0238	2.6626	0.372113	7.15535	8.34568e-13	5.82172e-11
ENSMUSG00000004709	Cd244	869.115	1.13053	0.158041	7.1534	8.46548e-13	5.88069e-11
ENSMUSG00000030403	Vasp	1505.02	1.1049	0.154574	7.14805	8.80224e-13	6.08925e-11
ENSMUSG00000018474	Chd3	1265.77	-0.911107	0.127497	-7.14608	8.92893e-13	6.12675e-11
ENSMUSG00000021596	Mctp1	289.214	-2.05158	0.287092	-7.14607	8.92994e-13	6.12675e-11
ENSMUSG00000052336	Cx3cr1	112.065	2.37656	0.332925	7.13842	9.44115e-13	6.45094e-11
ENSMUSG00000001741	Il16	748.934	-0.977182	0.13697	-7.13427	9.73055e-13	6.62154e-11
ENSMUSG00000020297	Nsg2	372.836	1.55422	0.218062	7.12739	1.02287e-12	6.90414e-11
ENSMUSG00000069729	Arid1b	1575.61	-0.837586	0.117513	-7.1276	1.02136e-12	6.90414e-11
ENSMUSG00000043088	Il17re	161.42	-2.0121	0.282895	-7.11253	1.13935e-12	7.65939e-11
ENSMUSG00000074570	Cass4	71.0058	3.3947	0.478009	7.10174	1.23191e-12	8.24839e-11
ENSMUSG00000026073	Il1r2	307.11	5.93858	0.836477	7.09952	1.25194e-12	8.34892e-11
ENSMUSG00000001482	Def8	459.862	-1.14897	0.161954	-7.09441	1.29902e-12	8.62836e-11
ENSMUSG00000019726	Lyst	393.334	1.94827	0.274711	7.09209	1.32103e-12	8.73974e-11
ENSMUSG00000046805	Mpeg1	220.806	4.65336	0.656267	7.09066	1.33478e-12	8.79584e-11
ENSMUSG00000018076	Med13l	4049.68	-0.857746	0.120979	-7.09002	1.3409e-12	8.80137e-11
ENSMUSG00000052736	Klrc2	52.9462	6.78378	0.957237	7.08684	1.37212e-12	8.97097e-11
ENSMUSG00000028874	Fgr	49.6981	6.2552	0.884998	7.06804	1.57139e-12	1.02337e-10
ENSMUSG00000071715	Ncf4	528.723	1.24884	0.176843	7.06185	1.64298e-12	1.06582e-10
ENSMUSG00000073490	AI607873	44.3399	4.92045	0.697921	7.05016	1.78718e-12	1.15488e-10
ENSMUSG00000030930	Chst15	264.59	-1.37905	0.195748	-7.04502	1.85431e-12	1.19363e-10
ENSMUSG00000071714	Csf2rb2	518.015	4.74238	0.675004	7.0257	2.1299e-12	1.36576e-10
ENSMUSG00000022952	Runx1	2488.65	-0.866835	0.123403	-7.02441	2.14971e-12	1.37318e-10
ENSMUSG00000029287	Tgfbr3	105.058	-2.18722	0.311574	-7.0199	2.22023e-12	1.41281e-10
ENSMUSG00000036067	Slc2a6	90.8392	3.46732	0.495164	7.00237	2.5166e-12	1.59531e-10
ENSMUSG00000063229	Ldha	3805.91	0.957992	0.137298	6.97748	3.00515e-12	1.89064e-10
ENSMUSG00000082292	Gm12250	293.318	1.42115	0.20367	6.97772	3.00016e-12	1.89064e-10
ENSMUSG00000042106	Fam212a	211.572	-1.57648	0.226031	-6.97463	3.06679e-12	1.92216e-10
ENSMUSG00000039637	Coro7	1288.32	-0.896801	0.128759	-6.96498	3.2846e-12	2.05097e-10
ENSMUSG00000010025	Aldh3a2	245.011	1.82398	0.262214	6.95608	3.4986e-12	2.17644e-10
ENSMUSG00000037138	Aff3	2626.99	-1.09799	0.157958	-6.95112	3.62393e-12	2.24603e-10
ENSMUSG00000028860	Sytl1	492.618	-1.31275	0.189214	-6.93792	3.9791e-12	2.45702e-10
ENSMUSG00000053541	Gm4759	809.154	-1.06536	0.153706	-6.93115	4.17444e-12	2.56813e-10
ENSMUSG00000001473	Tubb6	98.9039	2.74209	0.395748	6.9289	4.24133e-12	2.59969e-10
ENSMUSG00000019818	Cd164	2177.85	1.04661	0.151082	6.92746	4.28454e-12	2.61655e-10
ENSMUSG00000026104	Stat1	2108.95	2.72371	0.393301	6.92525	4.35202e-12	2.64806e-10
ENSMUSG00000092627	D130058E05Rik	130.696	-2.09702	0.303668	-6.90564	4.99783e-12	3.02996e-10
ENSMUSG00000024143	Rhoq	391.356	1.23383	0.178801	6.90059	5.17886e-12	3.12833e-10
ENSMUSG00000037868	Egr2	173.925	2.31592	0.335664	6.89952	5.21791e-12	3.14054e-10
ENSMUSG00000031778	Cx3cl1	44.5421	4.52978	0.656896	6.89574	5.35838e-12	3.20197e-10
ENSMUSG00000032021	Crtam	77.3671	8.83125	1.28064	6.89599	5.349e-12	3.20197e-10
ENSMUSG00000034614	Pik3ip1	1462.61	-1.0715	0.155667	-6.88329	5.84864e-12	3.48245e-10
ENSMUSG00000030413	Pglyrp1	50.8763	3.76681	0.547657	6.87804	6.06826e-12	3.60036e-10
ENSMUSG00000021109	Hif1a	1157.57	1.08096	0.157727	6.85336	7.21368e-12	4.26477e-10
ENSMUSG00000060477	Irak2	203.87	1.77326	0.258768	6.8527	7.2469e-12	4.26927e-10
ENSMUSG00000001173	Ocrl	260.344	-1.45981	0.213573	-6.83518	8.19028e-12	4.79117e-10
ENSMUSG00000027452	Acss1	270.669	-1.49243	0.218342	-6.83528	8.18479e-12	4.79117e-10
ENSMUSG00000024789	Jak2	965.329	1.41805	0.208959	6.78623	1.15102e-11	6.70973e-10
ENSMUSG00000030173	Klra5	69.0254	8.66735	1.27759	6.78413	1.16789e-11	6.78437e-10
ENSMUSG00000104876	Trdc	6081.88	-0.850021	0.125349	-6.78125	1.19144e-11	6.89713e-10
ENSMUSG00000031709	Tbc1d9	38.844	8.80261	1.29939	6.7744	1.24925e-11	7.20676e-10
ENSMUSG00000032359	Ctsh	165.971	8.0636	1.191	6.77046	1.28377e-11	7.38034e-10
ENSMUSG00000024300	Myo1f	959.607	1.17701	0.174095	6.76071	1.37318e-11	7.86721e-10
ENSMUSG00000030167	Klrc1	177.815	7.23964	1.07469	6.73652	1.6223e-11	9.26269e-10
ENSMUSG00000043931	Gimap7	118.552	2.02841	0.301249	6.73332	1.65833e-11	9.4361e-10
ENSMUSG00000024866	Acy3	72.6764	-2.77459	0.412559	-6.72533	1.75189e-11	9.93455e-10
ENSMUSG00000017929	B4galt5	344.847	1.58841	0.236202	6.72479	1.7585e-11	9.93821e-10
ENSMUSG00000090176	Cd200r2	151.05	8.87192	1.32009	6.72071	1.80845e-11	1.0186e-09
ENSMUSG00000073411	H2-D1	8407.79	0.775468	0.115481	6.71512	1.87911e-11	1.05483e-09
ENSMUSG00000053687	Dpep2	239.53	4.47717	0.667515	6.70722	1.98361e-11	1.10975e-09
ENSMUSG00000038418	Egr1	3359.41	0.999009	0.149002	6.70468	2.01847e-11	1.12549e-09
ENSMUSG00000024066	Xdh	80.1427	3.38911	0.506033	6.6974	2.12156e-11	1.17902e-09
ENSMUSG00000026126	Ptpn18	1414.07	-0.764689	0.114285	-6.69106	2.21566e-11	1.22722e-09
ENSMUSG00000041954	Tnfrsf18	516.213	1.58039	0.236241	6.68973	2.23589e-11	1.23433e-09
ENSMUSG00000047867	Gimap6	399.386	1.33438	0.199654	6.68346	2.33372e-11	1.28409e-09
ENSMUSG00000029333	Rasgef1b	73.0754	3.75233	0.562229	6.67403	2.48881e-11	1.36491e-09
ENSMUSG00000001467	Cyp51	794.888	0.897657	0.134584	6.66989	2.56004e-11	1.39937e-09
ENSMUSG00000025969	Nrp2	65.282	8.58628	1.28867	6.66291	2.68465e-11	1.4627e-09
ENSMUSG00000022540	Rogdi	237.01	2.02522	0.304488	6.65123	2.90656e-11	1.57844e-09
ENSMUSG00000038642	Ctss	1465.42	3.92489	0.590229	6.64976	2.93566e-11	1.58907e-09
ENSMUSG00000000628	Hk2	1280.23	0.742537	0.111804	6.64139	3.10734e-11	1.67656e-09
ENSMUSG00000058881	Zfp516	73.4682	2.88559	0.434593	6.63974	3.14228e-11	1.68994e-09
ENSMUSG00000022240	Ctnnd2	101.872	3.32781	0.503161	6.61382	3.74535e-11	2.0078e-09
ENSMUSG00000020614	Fam20a	1224.86	-0.826318	0.124965	-6.6124	3.78141e-11	2.02063e-09
ENSMUSG00000038650	Rnh1	717.512	1.20189	0.181921	6.60669	3.93012e-11	2.09339e-09
ENSMUSG00000101111	Gm28437	763.803	-1.38857	0.210277	-6.60355	4.01437e-11	2.13145e-09
ENSMUSG00000070691	Runx3	5062.09	0.584076	0.0884951	6.60009	4.10906e-11	2.1748e-09
ENSMUSG00000026630	Batf3	173.677	5.17869	0.785427	6.59347	4.2966e-11	2.26687e-09
ENSMUSG00000029135	Fosl2	188.978	1.7253	0.261897	6.5877	4.4668e-11	2.34923e-09
ENSMUSG00000029178	Klf3	1067.3	-0.934684	0.142107	-6.57732	4.79012e-11	2.51135e-09
ENSMUSG00000018909	Arrb1	616.475	1.50517	0.229022	6.57217	4.9587e-11	2.59158e-09
ENSMUSG00000032053	Pou2af1	82.9673	2.29433	0.35031	6.54944	5.7755e-11	3.00904e-09
ENSMUSG00000020702	Ccl1	35.5428	8.67449	1.32651	6.53932	6.17993e-11	3.20971e-09
ENSMUSG00000097194	9330175E14Rik	76.0843	3.03865	0.464811	6.5374	6.25984e-11	3.24112e-09
ENSMUSG00000001128	Cfp	695.542	4.416	0.676251	6.53011	6.57192e-11	3.39217e-09
ENSMUSG00000049608	Gpr55	103.154	2.86487	0.438757	6.52951	6.59856e-11	3.39541e-09
ENSMUSG00000028042	Zbtb7b	65.0706	3.57813	0.548639	6.52183	6.94557e-11	3.56297e-09
ENSMUSG00000076490	Trbc1	13601.7	-0.725534	0.111328	-6.51709	7.16823e-11	3.66591e-09
ENSMUSG00000032997	Chpf	74.4084	2.80255	0.430853	6.50465	7.78732e-11	3.97034e-09
ENSMUSG00000020641	Rsad2	201.372	1.475	0.22702	6.49722	8.18194e-11	4.15882e-09
ENSMUSG00000024725	Ostf1	1197.16	0.99673	0.153592	6.48945	8.61501e-11	4.36564e-09
ENSMUSG00000029304	Spp1	42.6872	4.92432	0.758952	6.48832	8.67975e-11	4.38512e-09
ENSMUSG00000034248	Slc25a37	1033.19	-1.15806	0.178659	-6.48199	9.05235e-11	4.55954e-09
ENSMUSG00000028634	Hivep3	262.641	1.53916	0.237528	6.47991	9.17749e-11	4.60865e-09
ENSMUSG00000030530	Furin	1175.44	2.52584	0.39035	6.47069	9.75532e-11	4.8841e-09
ENSMUSG00000026285	Pdcd1	62.4798	3.18492	0.49252	6.46659	1.00239e-10	5.00354e-09
ENSMUSG00000026981	Il1rn	39.815	4.04524	0.626852	6.45327	1.09464e-10	5.44771e-09
ENSMUSG00000046245	Pilra	285.704	2.06079	0.320286	6.43421	1.24115e-10	6.15845e-09
ENSMUSG00000102277	A130050O07Rik	615.57	-1.0915	0.169671	-6.433	1.25107e-10	6.18927e-09
ENSMUSG00000018774	Cd68	84.4825	2.91554	0.454445	6.41561	1.40256e-10	6.91818e-09
ENSMUSG00000037820	Tgm2	66.527	2.62813	0.409978	6.41041	1.45129e-10	7.13742e-09
ENSMUSG00000041836	Ptpre	3168.72	-0.856075	0.133679	-6.40394	1.51414e-10	7.42463e-09
ENSMUSG00000038811	Gngt2	425.872	1.34579	0.2102	6.40246	1.52897e-10	7.47538e-09
ENSMUSG00000102142	Gm26930	589.964	-1.10667	0.173319	-6.38516	1.71222e-10	8.3468e-09
ENSMUSG00000021403	Serpinb9b	120.968	8.65971	1.35739	6.37967	1.77471e-10	8.62623e-09
ENSMUSG00000064373	Sepp1	1393.06	-1.17587	0.18506	-6.354	2.09784e-10	1.01672e-08
ENSMUSG00000032323	Cyp11a1	410.396	1.39611	0.21988	6.3494	2.16151e-10	1.04454e-08
ENSMUSG00000047085	Lrrc4b	159.163	-2.0887	0.32981	-6.33303	2.404e-10	1.15837e-08
ENSMUSG00000070942	Il1rl2	31.2674	4.39651	0.696941	6.3083	2.82126e-10	1.35551e-08
ENSMUSG00000025014	Dntt	313.671	-1.45313	0.230447	-6.3057	2.86902e-10	1.37449e-08
ENSMUSG00000036526	Card11	264.406	1.89405	0.300446	6.30413	2.89812e-10	1.38446e-08
ENSMUSG00000000278	Scpep1	354.249	1.72297	0.27344	6.30109	2.95565e-10	1.4079e-08
ENSMUSG00000031444	F10	33.9814	4.54003	0.721717	6.2906	3.16241e-10	1.5021e-08
ENSMUSG00000034586	Hid1	132.819	-1.74679	0.277704	-6.29013	3.17197e-10	1.50236e-08
ENSMUSG00000040659	Efhd2	1204.69	1.19189	0.189593	6.28655	3.24602e-10	1.53308e-08
ENSMUSG00000076431	Sox4	2591.15	-1.07438	0.17094	-6.2851	3.27641e-10	1.54306e-08
ENSMUSG00000062524	Ncr1	284.221	7.89712	1.25874	6.27384	3.5225e-10	1.65428e-08
ENSMUSG00000024521	Pmaip1	356.665	1.42796	0.227743	6.27006	3.60907e-10	1.69018e-08
ENSMUSG00000073555	Gm4951	229.986	1.85967	0.296757	6.26664	3.68929e-10	1.72291e-08
ENSMUSG00000032446	Eomes	128.384	6.98863	1.11713	6.2559	3.95223e-10	1.84055e-08
ENSMUSG00000040274	Cdk6	27713	-0.767815	0.122773	-6.25395	4.0019e-10	1.85849e-08
ENSMUSG00000066406	Akap13	5450.39	-0.572678	0.0916487	-6.24861	4.14112e-10	1.9178e-08
ENSMUSG00000081723	Gm15931	37.7095	5.93268	0.950418	6.24218	4.31515e-10	1.99286e-08
ENSMUSG00000024516	Sec11c	2279.6	0.641089	0.1028	6.2363	4.48044e-10	2.06348e-08
ENSMUSG00000047181	Samd14	163.518	-2.01248	0.323239	-6.22597	4.78601e-10	2.19814e-08
ENSMUSG00000008496	Pou2f2	739.063	1.40847	0.226567	6.21658	5.08121e-10	2.3273e-08
ENSMUSG00000051314	Ffar2	1112.94	0.87584	0.140961	6.21336	5.18624e-10	2.3689e-08
ENSMUSG00000058794	Nfe2	819.137	-1.11297	0.17915	-6.2125	5.21476e-10	2.37542e-08
ENSMUSG00000029647	Pan3	3216.67	-0.594002	0.0957158	-6.20589	5.43878e-10	2.464e-08
ENSMUSG00000050377	Il31ra	121.879	-2.09601	0.337723	-6.20629	5.42506e-10	2.464e-08
ENSMUSG00000042129	Rassf4	132.945	6.23094	1.00417	6.20508	5.46705e-10	2.4701e-08
ENSMUSG00000059479	B3gnt8	104.946	2.25117	0.363512	6.19285	5.90875e-10	2.66245e-08
ENSMUSG00000025283	Sat1	187.593	1.85166	0.299433	6.18389	6.25407e-10	2.81046e-08
ENSMUSG00000024812	Tjp2	378.492	1.02826	0.166612	6.17156	6.76201e-10	3.02242e-08
ENSMUSG00000085936	2610307P16Rik	304.523	-1.44792	0.234608	-6.17168	6.75696e-10	3.02242e-08
ENSMUSG00000047180	Neurl3	492.073	1.20012	0.194493	6.17048	6.8085e-10	3.03506e-08
ENSMUSG00000039081	Zfp503	252.291	-1.20772	0.195962	-6.16305	7.13591e-10	3.17253e-08
ENSMUSG00000039783	Kmo	482.139	3.34491	0.543508	6.15429	7.54147e-10	3.34392e-08
ENSMUSG00000020048	Hsp90b1	3826.05	0.634412	0.103171	6.14915	7.7901e-10	3.445e-08
ENSMUSG00000018168	Ikzf3	177.768	8.04927	1.30992	6.14487	8.00286e-10	3.52973e-08
ENSMUSG00000084469	Gm22956	238.021	-2.08731	0.339711	-6.14435	8.02891e-10	3.53187e-08
ENSMUSG00000023044	Csad	273.45	-1.47386	0.240201	-6.13594	8.46546e-10	3.71411e-08
ENSMUSG00000002100	Mybpc3	34.0591	3.78464	0.617044	6.13349	8.59695e-10	3.7619e-08
ENSMUSG00000063856	Gpx1	5898.16	-0.594757	0.0971693	-6.12083	9.30884e-10	4.06275e-08
ENSMUSG00000026271	Gpr35	36.4277	4.38334	0.716959	6.11379	9.72936e-10	4.23519e-08
ENSMUSG00000041329	Atp1b2	38.2061	6.29011	1.02894	6.1132	9.7655e-10	4.23985e-08
ENSMUSG00000015396	Cd83	180.083	10.0512	1.64904	6.09518	1.09314e-09	4.73373e-08
ENSMUSG00000032026	Rexo2	814.15	0.935526	0.153803	6.08261	1.18244e-09	5.10717e-08
ENSMUSG00000024270	Slc39a6	810.887	-0.7982	0.131328	-6.0779	1.21763e-09	5.22032e-08
ENSMUSG00000027472	Pdrg1	1706.59	-0.683405	0.112435	-6.07822	1.21527e-09	5.22032e-08
ENSMUSG00000036712	Cyld	1095.59	0.819399	0.134817	6.07785	1.21803e-09	5.22032e-08
ENSMUSG00000030523	Trpm1	35.5505	4.52209	0.74518	6.06846	1.29145e-09	5.52077e-08
ENSMUSG00000041362	Shtn1	42.8263	7.97569	1.31467	6.06671	1.3056e-09	5.567e-08
ENSMUSG00000021025	Nfkbia	2598.85	2.11105	0.348095	6.06459	1.32287e-09	5.62623e-08
ENSMUSG00000006611	Hfe	92.1394	2.82122	0.466062	6.05331	1.41898e-09	6.01964e-08
ENSMUSG00000030376	Slc8a2	29.1268	8.38706	1.386	6.05128	1.437e-09	6.08064e-08
ENSMUSG00000032462	Pik3cb	244.643	1.24815	0.206571	6.04224	1.51992e-09	6.4152e-08
ENSMUSG00000034156	Bzrap1	249.97	2.08194	0.344681	6.0402	1.53924e-09	6.48036e-08
ENSMUSG00000038843	Gcnt1	761.331	2.54324	0.421652	6.03159	1.62352e-09	6.81798e-08
ENSMUSG00000043050	Tnp2	38.5869	7.82575	1.29778	6.0301	1.63855e-09	6.86378e-08
ENSMUSG00000022014	Epsti1	1160.94	0.886592	0.147123	6.02619	1.67875e-09	6.99702e-08
ENSMUSG00000036155	Mgat5	1640.64	-0.671913	0.111493	-6.0265	1.67546e-09	6.99702e-08
ENSMUSG00000040711	Sh3pxd2b	39.5903	4.5348	0.753751	6.01631	1.78437e-09	7.41869e-08
ENSMUSG00000053318	Slamf8	39.3386	6.43558	1.07029	6.01293	1.82199e-09	7.55628e-08
ENSMUSG00000050335	Lgals3	477.154	6.56536	1.0925	6.00946	1.86139e-09	7.70051e-08
ENSMUSG00000050587	Lrrc4c	131.579	2.24051	0.373188	6.00369	1.92878e-09	7.95958e-08
ENSMUSG00000034171	Faah	150.738	2.25239	0.375212	6.00298	1.93729e-09	7.97492e-08
ENSMUSG00000021322	Aoah	22.6958	8.02457	1.33859	5.9948	2.0373e-09	8.34106e-08
ENSMUSG00000024737	Slc15a3	30.9984	5.64276	0.941231	5.99508	2.03381e-09	8.34106e-08
ENSMUSG00000026864	Hspa5	7599.11	0.57107	0.0952658	5.99449	2.04124e-09	8.34106e-08
ENSMUSG00000042272	Sestd1	597.618	-0.941077	0.157111	-5.9899	2.09968e-09	8.55889e-08
ENSMUSG00000022419	Deptor	2167.9	-0.912764	0.152466	-5.98667	2.1418e-09	8.7093e-08
ENSMUSG00000026548	Slamf9	33.5013	5.69762	0.952679	5.98063	2.22278e-09	9.01657e-08
ENSMUSG00000021253	Tgfb3	100.181	1.94279	0.325072	5.97651	2.27966e-09	9.22489e-08
ENSMUSG00000025813	Homer2	36.8657	7.7593	1.29839	5.97607	2.2858e-09	9.22735e-08
ENSMUSG00000033450	Tagap	552.737	1.30851	0.219094	5.97238	2.33811e-09	9.41569e-08
ENSMUSG00000029581	Fscn1	501.025	5.7436	0.961769	5.97192	2.34483e-09	9.42e-08
ENSMUSG00000002028	Kmt2a	4622.27	-0.640741	0.107581	-5.95587	2.58697e-09	1.03678e-07
ENSMUSG00000031264	Btk	269.339	-1.2893	0.216545	-5.95398	2.61706e-09	1.04382e-07
ENSMUSG00000072596	Ear2	23.2961	8.06625	1.35469	5.95429	2.612e-09	1.04382e-07
ENSMUSG00000051212	Gpr183	358.092	1.43115	0.240725	5.94516	2.7618e-09	1.09892e-07
ENSMUSG00000050395	Tnfsf15	53.8162	3.28932	0.553324	5.94465	2.77042e-09	1.09973e-07
ENSMUSG00000028049	Scamp3	1812.91	-0.76337	0.128687	-5.93197	2.99319e-09	1.18359e-07
ENSMUSG00000047821	Trim16	575.876	-1.17657	0.198349	-5.93182	2.9959e-09	1.18359e-07
ENSMUSG00000034353	Ramp1	1100.67	-1.1588	0.195426	-5.92961	3.0365e-09	1.1968e-07
ENSMUSG00000031402	Mpp1	1293.3	-1.02048	0.172193	-5.92638	3.09682e-09	1.21769e-07
ENSMUSG00000004612	Nkg7	2317.78	-0.695716	0.117425	-5.92479	3.12698e-09	1.22666e-07
ENSMUSG00000026637	Traf5	123.554	2.21917	0.374797	5.92097	3.20045e-09	1.25048e-07
ENSMUSG00000037110	Ralgapa2	591.716	-0.868755	0.146728	-5.92086	3.20271e-09	1.25048e-07
ENSMUSG00000021998	Lcp1	7994.21	0.598487	0.101135	5.91772	3.2643e-09	1.27155e-07
ENSMUSG00000104339	C130089K02Rik	1283.97	-1.03547	0.175102	-5.91353	3.34855e-09	1.30133e-07
ENSMUSG00000058818	Pirb	154.674	4.96059	0.839841	5.90658	3.49276e-09	1.35422e-07
ENSMUSG00000007872	Id3	482.11	-1.47227	0.249374	-5.90385	3.55108e-09	1.37363e-07
ENSMUSG00000024308	Tapbp	1917.22	0.96889	0.164206	5.90044	3.62534e-09	1.39911e-07
ENSMUSG00000071637	Cebpd	55.0623	3.37969	0.573539	5.89269	3.79956e-09	1.46296e-07
ENSMUSG00000102037	Bcl2a1a	191.735	10.1417	1.72433	5.88152	4.06506e-09	1.56158e-07
ENSMUSG00000091649	Phf11b	73.0154	3.03863	0.51674	5.88039	4.09306e-09	1.56873e-07
ENSMUSG00000034855	Cxcl10	32.9998	5.02856	0.856088	5.87388	4.25716e-09	1.62787e-07
ENSMUSG00000027130	Slc12a6	648.565	-1.0062	0.171324	-5.87309	4.27733e-09	1.63185e-07
ENSMUSG00000047604	Frat2	674.621	-1.14862	0.19559	-5.87258	4.29066e-09	1.6332e-07
ENSMUSG00000040253	Gbp7	4186.91	0.703443	0.119824	5.87066	4.34068e-09	1.64847e-07
ENSMUSG00000024659	Anxa1	260.721	1.60476	0.273418	5.86925	4.37771e-09	1.65875e-07
ENSMUSG00000040713	Creg1	1407.84	-0.755229	0.128756	-5.86559	4.47532e-09	1.6919e-07
ENSMUSG00000005950	P2rx5	39.8327	5.30258	0.904839	5.86025	4.62174e-09	1.73936e-07
ENSMUSG00000060675	Pla2g16	1194.43	0.887078	0.151369	5.86036	4.61878e-09	1.73936e-07
ENSMUSG00000039156	Stim2	1183.71	0.725781	0.123921	5.85683	4.71796e-09	1.77157e-07
ENSMUSG00000030924	2610020H08Rik	657.137	-0.829098	0.141616	-5.85455	4.78299e-09	1.79196e-07
ENSMUSG00000015846	Rxra	61.9413	2.82827	0.483146	5.85387	4.80273e-09	1.79532e-07
ENSMUSG00000030149	Klrk1	149.334	7.56592	1.29395	5.84713	5.00129e-09	1.86536e-07
ENSMUSG00000001270	Ckb	65.6799	2.96132	0.506586	5.84564	5.04635e-09	1.87796e-07
ENSMUSG00000015879	Fam184b	29.3343	5.93731	1.0158	5.84493	5.06784e-09	1.88176e-07
ENSMUSG00000042675	Ypel3	1171.2	-0.683452	0.117089	-5.83703	5.31409e-09	1.96881e-07
ENSMUSG00000026463	Atp2b4	1526.3	-0.968374	0.166017	-5.83299	5.44437e-09	2.0126e-07
ENSMUSG00000038213	Tapbpl	334.706	1.10939	0.190511	5.82321	5.77289e-09	2.12463e-07
ENSMUSG00000047678	Gpr82	21.9455	7.97729	1.36989	5.82329	5.77015e-09	2.12463e-07
ENSMUSG00000028211	Trp53inp1	1663.77	-0.683016	0.117428	-5.81647	6.01042e-09	2.20717e-07
ENSMUSG00000002076	Hsf2bp	80.7864	-2.13135	0.366476	-5.81579	6.03482e-09	2.21126e-07
ENSMUSG00000018983	E2f2	904.458	0.846855	0.145703	5.81219	6.16592e-09	2.25435e-07
ENSMUSG00000030560	Ctsc	1822.63	0.712238	0.122575	5.81062	6.22405e-09	2.27062e-07
ENSMUSG00000006342	Susd2	34.3351	4.518	0.778037	5.80692	6.36344e-09	2.3164e-07
ENSMUSG00000026918	Brd3	2342.95	-0.645451	0.111249	-5.80186	6.55832e-09	2.38214e-07
ENSMUSG00000050232	Cxcr3	34.3625	4.08317	0.704149	5.79873	6.68194e-09	2.42177e-07
ENSMUSG00000030361	Klrb1a	34.2561	7.65221	1.31977	5.79813	6.70594e-09	2.42519e-07
ENSMUSG00000006519	Cyba	978.407	1.00201	0.173026	5.79112	6.99203e-09	2.52318e-07
ENSMUSG00000058672	Tubb2a	121.933	2.43061	0.419863	5.78906	7.07828e-09	2.54879e-07
ENSMUSG00000007950	Abhd8	380.175	-1.04369	0.180361	-5.7867	7.17843e-09	2.57929e-07
ENSMUSG00000029094	Afap1	196.927	-1.33901	0.231501	-5.78403	7.29311e-09	2.61485e-07
ENSMUSG00000028944	Prkag2	452.929	-1.06552	0.184237	-5.78338	7.32136e-09	2.61935e-07
ENSMUSG00000039899	Fgl2	263.098	3.79395	0.656257	5.78121	7.41672e-09	2.64779e-07
ENSMUSG00000048498	Cd300e	20.064	7.84963	1.35905	5.7758	7.65875e-09	2.72835e-07
ENSMUSG00000039377	Hlx	59.978	3.12925	0.542176	5.77164	7.8503e-09	2.79062e-07
ENSMUSG00000027293	Ehd4	707.334	0.905918	0.157242	5.76131	8.34653e-09	2.96071e-07
ENSMUSG00000037902	Sirpa	218.652	6.17706	1.07647	5.73826	9.56526e-09	3.38582e-07
ENSMUSG00000042671	Rgs8	84.622	-2.07551	0.361758	-5.73728	9.62113e-09	3.39838e-07
ENSMUSG00000036644	Tbc1d9b	1391.94	-0.795693	0.138771	-5.73385	9.81781e-09	3.46052e-07
ENSMUSG00000022995	Enah	2630.1	-0.623359	0.108743	-5.7324	9.90185e-09	3.48278e-07
ENSMUSG00000024754	Tmem2	310.133	1.2604	0.219963	5.73005	1.00402e-08	3.52402e-07
ENSMUSG00000037295	Ldlrap1	282.488	-1.15919	0.202587	-5.72192	1.05329e-08	3.68918e-07
ENSMUSG00000104698	RP24-142B15.4	34.6755	7.67005	1.3416	5.71709	1.08361e-08	3.78742e-07
ENSMUSG00000072568	Fam84b	565.75	0.868368	0.151935	5.71539	1.09452e-08	3.81753e-07
ENSMUSG00000051124	Gimap9	2443.07	0.711776	0.124607	5.71215	1.11558e-08	3.88286e-07
ENSMUSG00000096727	Psmb9	1429.27	0.669536	0.117248	5.71045	1.12678e-08	3.91367e-07
ENSMUSG00000039361	Picalm	1741.22	0.93453	0.163701	5.70875	1.13809e-08	3.94475e-07
ENSMUSG00000028207	Asph	371.237	0.966923	0.169409	5.70762	1.14564e-08	3.96267e-07
ENSMUSG00000027219	Slc28a2	566.234	-1.00404	0.175959	-5.70613	1.15573e-08	3.98104e-07
ENSMUSG00000041235	Chd7	109.875	5.21292	0.913542	5.70627	1.15477e-08	3.98104e-07
ENSMUSG00000074139	1700057G04Rik	85.6233	8.04119	1.40931	5.70577	1.15817e-08	3.98122e-07
ENSMUSG00000054619	Mettl7a1	396.647	-1.03982	0.182616	-5.69406	1.24057e-08	4.25571e-07
ENSMUSG00000057606	Colq	60.4171	2.79207	0.490708	5.68987	1.27139e-08	4.35248e-07
ENSMUSG00000021127	Zfp36l1	1202.23	2.25629	0.397231	5.68003	1.34673e-08	4.60097e-07
ENSMUSG00000035245	Eogt	33.4967	3.54034	0.623356	5.67949	1.35095e-08	4.60594e-07
ENSMUSG00000048534	Amica1	392.236	5.07342	0.893373	5.67895	1.35521e-08	4.61102e-07
ENSMUSG00000006362	Cbfa2t3	2052.48	-0.704533	0.124376	-5.66454	1.47419e-08	5.00564e-07
ENSMUSG00000022906	Parp9	694.648	0.943884	0.166649	5.66392	1.47952e-08	5.01351e-07
ENSMUSG00000041736	Tspo	932.063	0.976085	0.172595	5.65535	1.55528e-08	5.25955e-07
ENSMUSG00000056124	B4galt6	34.4017	5.35876	0.947722	5.65436	1.56426e-08	5.27923e-07
ENSMUSG00000056708	Ier5	933.262	1.02662	0.1818	5.64697	1.633e-08	5.50008e-07
ENSMUSG00000028362	Tnfsf8	120.94	2.14261	0.379993	5.63856	1.71479e-08	5.76391e-07
ENSMUSG00000021115	Vrk1	1584.38	0.944811	0.167662	5.63523	1.74828e-08	5.86465e-07
ENSMUSG00000027506	Tpd52	1001.19	-0.787958	0.139978	-5.62915	1.81099e-08	6.06283e-07
ENSMUSG00000036469	2001-03-01	150.521	2.11387	0.375722	5.62615	1.84278e-08	6.15687e-07
ENSMUSG00000052407	Ccdc171	234.475	-1.1576	0.205822	-5.62428	1.86285e-08	6.21149e-07
ENSMUSG00000032020	Ubash3b	532.487	1.1559	0.205744	5.61813	1.93033e-08	6.42365e-07
ENSMUSG00000042622	Maff	97.9062	1.95241	0.347696	5.61526	1.96263e-08	6.51811e-07
ENSMUSG00000021087	Rtn1	19.3471	7.79464	1.38844	5.61394	1.97776e-08	6.55533e-07
ENSMUSG00000027843	Ptpn22	527.986	1.2134	0.216173	5.6131	1.98733e-08	6.57395e-07
ENSMUSG00000052821	Cysltr1	515.944	1.41101	0.25159	5.60836	2.04251e-08	6.74312e-07
ENSMUSG00000070576	Mn1	61.2041	-2.36659	0.422029	-5.60765	2.05095e-08	6.75761e-07
ENSMUSG00000026987	Baz2b	4124.84	-0.624577	0.111411	-5.60605	2.06995e-08	6.80675e-07
ENSMUSG00000026014	Raph1	181.282	2.03636	0.36338	5.60393	2.09542e-08	6.87692e-07
ENSMUSG00000091955	Gm9844	3505.09	0.798282	0.142488	5.60245	2.1134e-08	6.92231e-07
ENSMUSG00000020400	Tnip1	674.849	0.961521	0.171894	5.59368	2.22304e-08	7.26716e-07
ENSMUSG00000068227	Il2rb	630.293	5.69913	1.01911	5.59228	2.24111e-08	7.3119e-07
ENSMUSG00000005470	Asf1b	532.369	0.904424	0.161849	5.58808	2.296e-08	7.47634e-07
ENSMUSG00000021495	Fam193b	1203.9	-0.658291	0.117846	-5.58601	2.32349e-08	7.55113e-07
ENSMUSG00000043110	Lrrn4	52.5485	-2.79993	0.501736	-5.58049	2.39846e-08	7.77961e-07
ENSMUSG00000039959	Hip1	151.198	1.74297	0.312501	5.5775	2.44005e-08	7.89914e-07
ENSMUSG00000036019	Tmtc2	543.178	-0.869561	0.155966	-5.57531	2.4709e-08	7.98349e-07
ENSMUSG00000006281	Tep1	391.013	1.60571	0.288078	5.57388	2.49124e-08	8.02128e-07
ENSMUSG00000027737	Slc7a11	78.0968	2.23184	0.400414	5.57381	2.49222e-08	8.02128e-07
ENSMUSG00000028300	3110043O21Rik	47.8219	3.09403	0.555997	5.56482	2.62417e-08	8.4297e-07
ENSMUSG00000030232	Aebp2	1153.96	0.802112	0.144235	5.56113	2.68035e-08	8.5936e-07
ENSMUSG00000041609	Ccdc64	266.092	-1.08905	0.196256	-5.54912	2.87118e-08	9.18777e-07
ENSMUSG00000062593	Lilrb4	753.369	1.12551	0.202846	5.5486	2.87963e-08	9.19717e-07
ENSMUSG00000049866	Arl4c	1114.53	0.820324	0.147881	5.5472	2.90276e-08	9.2533e-07
ENSMUSG00000038037	Socs1	670.697	0.907015	0.163678	5.54145	2.99986e-08	9.54458e-07
ENSMUSG00000031391	L1cam	70.7351	2.83783	0.512701	5.53506	3.11117e-08	9.87989e-07
ENSMUSG00000020340	Cyfip2	1830.42	-0.659043	0.119281	-5.52512	3.29262e-08	1.04008e-06
ENSMUSG00000024038	Ndufv3	2265.32	0.666915	0.120707	5.52505	3.29391e-08	1.04008e-06
ENSMUSG00000028063	Lmna	31.4191	7.52687	1.36231	5.52508	3.29336e-08	1.04008e-06
ENSMUSG00000032422	Snx14	854.957	-0.953918	0.17279	-5.52068	3.37688e-08	1.06426e-06
ENSMUSG00000030199	Etv6	3124.67	-0.593765	0.107626	-5.51694	3.44956e-08	1.08512e-06
ENSMUSG00000022512	Cldn1	29.9752	7.45859	1.35212	5.51623	3.46353e-08	1.08746e-06
ENSMUSG00000002204	Napsa	3485.3	0.578898	0.104954	5.51573	3.47334e-08	1.08849e-06
ENSMUSG00000023912	Slc25a27	51.3287	-2.61707	0.474504	-5.51537	3.48038e-08	1.08865e-06
ENSMUSG00000032068	Plet1	527.467	5.15676	0.935843	5.51028	3.58256e-08	1.11851e-06
ENSMUSG00000000982	Ccl3	177.34	3.70144	0.672102	5.50725	3.64477e-08	1.13581e-06
ENSMUSG00000075225	Ccdc162	26.1354	4.76396	0.865627	5.50347	3.72382e-08	1.15828e-06
ENSMUSG00000015950	Ncf1	1815.34	0.855074	0.155396	5.50256	3.74315e-08	1.16212e-06
ENSMUSG00000003484	Cyp4f18	56.2606	2.28402	0.415255	5.50028	3.7919e-08	1.17506e-06
ENSMUSG00000035356	Nfkbiz	373.239	1.4045	0.25542	5.49878	3.82423e-08	1.18289e-06
ENSMUSG00000024219	Anks1	920.296	-1.054	0.191735	-5.49717	3.85937e-08	1.19154e-06
ENSMUSG00000026672	Optn	25.5336	4.81171	0.875437	5.49635	3.87728e-08	1.19486e-06
ENSMUSG00000003955	Fam162a	1294.07	0.767099	0.139827	5.48605	4.11022e-08	1.26431e-06
ENSMUSG00000017009	Sdc4	32.307	4.19087	0.764122	5.48456	4.14498e-08	1.27265e-06
ENSMUSG00000084788	Gm11342	84.785	-1.89092	0.344792	-5.48422	4.15301e-08	1.27278e-06
ENSMUSG00000004568	Arhgef18	863.558	-0.937618	0.170996	-5.48329	4.17494e-08	1.27715e-06
ENSMUSG00000022773	Ypel1	231.953	-1.27032	0.231745	-5.48155	4.21615e-08	1.28739e-06
ENSMUSG00000000600	Krit1	1324.45	-0.660642	0.120536	-5.48085	4.2329e-08	1.29015e-06
ENSMUSG00000078795	Ceacam15	20.5837	7.88715	1.44186	5.47014	4.49683e-08	1.36809e-06
ENSMUSG00000035493	Tgfbi	29.4189	5.90726	1.08092	5.46503	4.62836e-08	1.40554e-06
ENSMUSG00000061143	Maml3	1035.68	-0.895299	0.163875	-5.46331	4.67337e-08	1.41662e-06
ENSMUSG00000019960	Dusp6	1024.98	0.810954	0.148466	5.46222	4.70222e-08	1.42278e-06
ENSMUSG00000046207	Pik3r6	294.422	3.31003	0.607019	5.45293	4.95472e-08	1.49647e-06
ENSMUSG00000022126	Irg1	24.3767	5.63004	1.03355	5.44729	5.11434e-08	1.54189e-06
ENSMUSG00000039735	Fnbp1l	30.3858	6.55725	1.20417	5.44543	5.16804e-08	1.55526e-06
ENSMUSG00000029436	Mmp17	95.444	-1.97776	0.363252	-5.44461	5.19196e-08	1.55965e-06
ENSMUSG00000033355	Rtp4	434.368	1.2304	0.226104	5.44174	5.27613e-08	1.58208e-06
ENSMUSG00000022191	Drosha	1653.06	-0.763688	0.140389	-5.43981	5.33386e-08	1.59652e-06
ENSMUSG00000024691	Fam111a	3060.71	0.571161	0.105062	5.43641	5.43652e-08	1.62433e-06
ENSMUSG00000022665	Ccdc80	143.892	5.48403	1.01097	5.4245	5.81155e-08	1.73018e-06
ENSMUSG00000042364	Snx18	548.292	0.88688	0.163487	5.42478	5.80251e-08	1.73018e-06
ENSMUSG00000039304	Tnfsf10	365.716	1.08261	0.199851	5.41706	6.05883e-08	1.80058e-06
ENSMUSG00000019943	Atp2b1	740.042	0.989022	0.182879	5.40807	6.37091e-08	1.88996e-06
ENSMUSG00000029869	Ephb6	73.7844	-1.97578	0.365443	-5.40653	6.4256e-08	1.9028e-06
ENSMUSG00000037126	Psd	175.715	1.74331	0.322502	5.40559	6.45939e-08	1.90603e-06
ENSMUSG00000038481	Cdk19	1326.55	-0.72353	0.133843	-5.40582	6.45119e-08	1.90603e-06
ENSMUSG00000020577	Tspan13	4030.56	-0.572916	0.106034	-5.40314	6.54858e-08	1.92894e-06
ENSMUSG00000106219	RP23-192C21.3	235.397	-1.29498	0.239841	-5.39933	6.68887e-08	1.96679e-06
ENSMUSG00000066026	Dhrs3	270.225	-1.10291	0.204432	-5.39499	6.85291e-08	2.01147e-06
ENSMUSG00000019942	Cdk1	1391.75	0.602422	0.111755	5.39055	7.02425e-08	2.05814e-06
ENSMUSG00000092021	Gbp11	118.497	-1.78391	0.330991	-5.3896	7.06155e-08	2.06544e-06
ENSMUSG00000030064	Frmd4b	71.04	2.48361	0.46091	5.38848	7.10568e-08	2.07471e-06
ENSMUSG00000024975	Pdcd4	797.677	-0.718642	0.133414	-5.38656	7.18189e-08	2.09056e-06
ENSMUSG00000026728	Vim	7941.2	1.78379	0.331173	5.38629	7.19272e-08	2.09056e-06
ENSMUSG00000028270	Gbp2	1258.47	2.39172	0.444049	5.38617	7.19757e-08	2.09056e-06
ENSMUSG00000038121	Fam210a	1190.68	-0.705467	0.131045	-5.3834	7.30933e-08	2.11932e-06
ENSMUSG00000042379	Esm1	554.906	-0.931158	0.173286	-5.37353	7.72085e-08	2.23476e-06
ENSMUSG00000017493	Igfbp4	6603.35	-0.714774	0.133165	-5.36758	7.98009e-08	2.30579e-06
ENSMUSG00000049690	Nckap5	132.134	-1.67348	0.311957	-5.36445	8.11946e-08	2.342e-06
ENSMUSG00000017830	Dhx58	164.317	1.33177	0.248393	5.36157	8.2504e-08	2.37566e-06
ENSMUSG00000013236	Ptprs	985.252	-0.722805	0.134832	-5.36078	8.28649e-08	2.38194e-06
ENSMUSG00000027562	Car2	534.594	2.72404	0.508925	5.35253	8.67314e-08	2.48879e-06
ENSMUSG00000030161	Gabarapl1	697.731	-0.811693	0.151665	-5.35189	8.7039e-08	2.49332e-06
ENSMUSG00000033502	Cdc14a	333.196	1.00957	0.188824	5.34663	8.9607e-08	2.56248e-06
ENSMUSG00000042759	Apobr	91.7313	1.99122	0.372468	5.34602	8.99087e-08	2.56671e-06
ENSMUSG00000068129	Cst7	1736.02	-0.587381	0.10988	-5.34566	9.00884e-08	2.56744e-06
ENSMUSG00000039934	Gsap	71.6259	2.6866	0.502622	5.34517	9.03322e-08	2.57e-06
ENSMUSG00000041765	Ubac2	643.545	0.800494	0.149786	5.34425	9.07902e-08	2.57863e-06
ENSMUSG00000030104	Edem1	843.032	1.00978	0.189149	5.33855	9.36935e-08	2.65656e-06
ENSMUSG00000040732	Erg	701.72	-1.1504	0.215538	-5.33733	9.43272e-08	2.66999e-06
ENSMUSG00000039007	Cpq	56.6564	-2.4657	0.46269	-5.32906	9.87234e-08	2.78969e-06
ENSMUSG00000000318	Clec10a	139.205	1.96819	0.3696	5.32519	1.00847e-07	2.84486e-06
ENSMUSG00000017716	Birc5	1596.17	0.55211	0.103721	5.32303	1.02053e-07	2.87402e-06
ENSMUSG00000057135	Scimp	66.9904	3.44481	0.647236	5.32234	1.0244e-07	2.88007e-06
ENSMUSG00000031397	Tktl1	36.1983	3.47667	0.653636	5.31896	1.04362e-07	2.92917e-06
ENSMUSG00000028645	Slc2a1	517.204	0.936557	0.176105	5.31817	1.04819e-07	2.93703e-06
ENSMUSG00000024738	Pga5	17.9743	7.69083	1.44747	5.31328	1.07667e-07	3.01179e-06
ENSMUSG00000054091	1810037I17Rik	857.484	0.899737	0.169376	5.31207	1.08388e-07	3.02686e-06
ENSMUSG00000048148	Nwd1	229.026	-1.74026	0.328041	-5.30502	1.12662e-07	3.14098e-06
ENSMUSG00000026072	Il1r1	98.5037	1.91838	0.361676	5.30413	1.1321e-07	3.15098e-06
ENSMUSG00000031838	Ifi30	290.745	2.96855	0.559718	5.30366	1.13505e-07	3.15392e-06
ENSMUSG00000030465	Psd3	99.72	-1.71334	0.323374	-5.29832	1.16872e-07	3.24207e-06
ENSMUSG00000022639	5330426P16Rik	105.023	1.80777	0.341514	5.29339	1.20069e-07	3.32524e-06
ENSMUSG00000034101	Ctnnd1	14.6623	7.3955	1.39842	5.28848	1.2334e-07	3.41016e-06
ENSMUSG00000070803	Cited4	16.7563	7.58904	1.43652	5.28292	1.27143e-07	3.50949e-06
ENSMUSG00000020580	Rock2	1252.6	-0.597139	0.113068	-5.28122	1.28328e-07	3.53633e-06
ENSMUSG00000026872	Zeb2	575.191	-0.889344	0.168434	-5.28008	1.29126e-07	3.55126e-06
ENSMUSG00000056608	Chd9	1792.03	-0.563391	0.106706	-5.27984	1.29296e-07	3.55126e-06
ENSMUSG00000098243	Gm4258	1224.15	-1.02376	0.193949	-5.27848	1.30263e-07	3.57193e-06
ENSMUSG00000029413	Naaa	70.1179	1.8959	0.359419	5.27491	1.32819e-07	3.63605e-06
ENSMUSG00000061232	H2-K1	12048.9	0.640151	0.121372	5.27431	1.33259e-07	3.64212e-06
ENSMUSG00000038633	Degs1	478.805	0.891675	0.169238	5.26877	1.37338e-07	3.74747e-06
ENSMUSG00000032221	Mns1	491.906	0.836668	0.158993	5.26229	1.42272e-07	3.87575e-06
ENSMUSG00000024299	Adamts10	392.182	-1.14413	0.217805	-5.253	1.4964e-07	4.06982e-06
ENSMUSG00000056214	Pard6g	417.48	-1.01187	0.192648	-5.25245	1.50088e-07	4.07534e-06
ENSMUSG00000051618	Ubqln3	29.5496	-3.37173	0.642042	-5.25156	1.50812e-07	4.08836e-06
ENSMUSG00000107286	RP24-122N24.2	494.138	-0.838781	0.159734	-5.25112	1.51173e-07	4.09149e-06
ENSMUSG00000024507	Hsd17b4	400.958	1.07921	0.205601	5.24906	1.52881e-07	4.13102e-06
ENSMUSG00000102212	C230085N15Rik	349.99	-0.986305	0.18802	-5.24574	1.55656e-07	4.19919e-06
ENSMUSG00000030200	Bcl2l14	259.206	-1.16664	0.222615	-5.24061	1.60045e-07	4.3106e-06
ENSMUSG00000097365	C030034L19Rik	385.035	-1.39335	0.265964	-5.23889	1.61548e-07	4.34408e-06
ENSMUSG00000015709	Arnt2	186.975	1.31996	0.252099	5.23586	1.64222e-07	4.40886e-06
ENSMUSG00000079419	Ms4a6c	116.76	1.76085	0.336415	5.23418	1.65723e-07	4.442e-06
ENSMUSG00000031584	Gsr	502.827	0.810755	0.155072	5.22825	1.71123e-07	4.57941e-06
ENSMUSG00000027778	Ift80	1119.62	-0.709247	0.135673	-5.22762	1.71706e-07	4.58031e-06
ENSMUSG00000071713	Csf2rb	1764.66	3.14654	0.601893	5.22773	1.71601e-07	4.58031e-06
ENSMUSG00000042745	Id1	331.507	-1.06265	0.203296	-5.22712	1.72171e-07	4.58535e-06
ENSMUSG00000002944	Cd36	25.2401	6.32804	1.21122	5.22453	1.74596e-07	4.64252e-06
ENSMUSG00000074466	Gm15417	30.3797	3.8328	0.733831	5.22301	1.76041e-07	4.6735e-06
ENSMUSG00000028364	Tnc	26.0397	4.66769	0.894608	5.21759	1.8127e-07	4.80466e-06
ENSMUSG00000022216	Psme1	2797.02	0.669436	0.128334	5.21635	1.82487e-07	4.81395e-06
ENSMUSG00000037362	Nov	89.6127	1.86032	0.356604	5.21676	1.82076e-07	4.81395e-06
ENSMUSG00000044309	Apol7c	105.767	7.29274	1.39802	5.21647	1.82368e-07	4.81395e-06
ENSMUSG00000020023	Tmcc3	47.0906	9.07904	1.74111	5.2145	1.84311e-07	4.8544e-06
ENSMUSG00000097640	Gm20033	73.8999	-1.99721	0.383057	-5.21387	1.84945e-07	4.86342e-06
ENSMUSG00000034641	Cd300ld	14.531	7.38483	1.41753	5.20963	1.89221e-07	4.96802e-06
ENSMUSG00000027397	Slc20a1	968.507	0.745277	0.14321	5.20409	1.94953e-07	5.11048e-06
ENSMUSG00000027947	Il6ra	109.997	2.20331	0.423436	5.20341	1.95669e-07	5.12117e-06
ENSMUSG00000038304	Cd160	788.893	2.03457	0.391086	5.20236	1.96773e-07	5.142e-06
ENSMUSG00000028565	Nfia	161.796	-1.39012	0.267433	-5.19803	2.01412e-07	5.25499e-06
ENSMUSG00000003882	Il7r	805.74	1.11264	0.214121	5.19631	2.03283e-07	5.29182e-06
ENSMUSG00000064267	Hvcn1	127.299	1.99229	0.383417	5.19615	2.03458e-07	5.29182e-06
ENSMUSG00000059810	Rgs3	130.68	1.59126	0.306324	5.19469	2.05066e-07	5.32533e-06
ENSMUSG00000040314	Ctsg	224.868	-1.39509	0.268756	-5.19091	2.09268e-07	5.42599e-06
ENSMUSG00000033880	Lgals3bp	898.964	0.729466	0.140581	5.18894	2.11495e-07	5.47101e-06
ENSMUSG00000073889	Il11ra1	51.3977	-2.24229	0.432141	-5.18879	2.11661e-07	5.47101e-06
ENSMUSG00000004460	Dnajb11	712.898	0.770559	0.14892	5.17431	2.28751e-07	5.89448e-06
ENSMUSG00000048277	Syngr2	866.905	1.13667	0.219672	5.17441	2.28632e-07	5.89448e-06
ENSMUSG00000040998	Npnt	15.3252	7.45962	1.44263	5.17083	2.33057e-07	5.99619e-06
ENSMUSG00000022456	2003-09-01	197.587	1.8071	0.349603	5.16901	2.35335e-07	6.03616e-06
ENSMUSG00000054720	Lrrc8c	654.694	0.944388	0.182697	5.16915	2.35163e-07	6.03616e-06
ENSMUSG00000084302	Gm12194	43.3757	-3.32345	0.643553	-5.16421	2.41452e-07	6.18354e-06
ENSMUSG00000048521	Cxcr6	567.215	5.68074	1.10015	5.16361	2.42237e-07	6.19414e-06
ENSMUSG00000056724	Nbeal2	629.717	-0.801019	0.155223	-5.16043	2.46386e-07	6.29057e-06
ENSMUSG00000027570	Col9a3	88.7369	1.80657	0.350148	5.15946	2.47668e-07	6.31363e-06
ENSMUSG00000079523	Tmsb10	1479.21	0.834083	0.161733	5.15718	2.50701e-07	6.3812e-06
ENSMUSG00000021411	Pxdc1	16.0037	7.52478	1.45927	5.15653	2.51568e-07	6.39351e-06
ENSMUSG00000028273	Pdlim5	125.899	1.82434	0.353858	5.15558	2.52841e-07	6.41608e-06
ENSMUSG00000013663	Pten	2615.65	-0.523728	0.10161	-5.15428	2.54601e-07	6.45093e-06
ENSMUSG00000029875	Ccdc184	18.8644	7.75957	1.50615	5.15192	2.57832e-07	6.52287e-06
ENSMUSG00000047409	Ctdspl	91.5254	-1.90433	0.369711	-5.15086	2.5929e-07	6.54981e-06
ENSMUSG00000102224	4930447F24Rik	27.3984	6.44522	1.25162	5.14949	2.61192e-07	6.58788e-06
ENSMUSG00000037706	Cd81	121.636	-1.4438	0.28052	-5.14686	2.64876e-07	6.66065e-06
ENSMUSG00000099597	Gm28933	790.03	-0.871534	0.169324	-5.14713	2.64496e-07	6.66065e-06
ENSMUSG00000020190	Mknk2	1719.33	-0.565883	0.110006	-5.14412	2.6878e-07	6.73264e-06
ENSMUSG00000025557	Slc15a1	31.9661	3.64092	0.707757	5.1443	2.68517e-07	6.73264e-06
ENSMUSG00000037921	Ddx60	54.6477	2.31724	0.450474	5.144	2.6895e-07	6.73264e-06
ENSMUSG00000039239	Tgfb2	1095.27	-0.870456	0.169275	-5.14227	2.71445e-07	6.78491e-06
ENSMUSG00000070643	Sox13	162.481	-1.56373	0.30425	-5.13963	2.7528e-07	6.87047e-06
ENSMUSG00000037321	Tap1	1391.22	0.821908	0.159963	5.13813	2.77489e-07	6.91525e-06
ENSMUSG00000067341	H2-Eb2	24.3425	7.15545	1.39339	5.13526	2.81748e-07	7.01089e-06
ENSMUSG00000018770	Atp5g3	6718.56	0.455798	0.0888479	5.13009	2.89607e-07	7.18502e-06
ENSMUSG00000024937	Ehbp1l1	372.132	1.1509	0.224335	5.13028	2.89314e-07	7.18502e-06
ENSMUSG00000052270	Fpr2	26.6067	6.3594	1.24012	5.12806	2.92742e-07	7.25199e-06
ENSMUSG00000071337	Tia1	2572.11	-0.617289	0.120401	-5.12696	2.9445e-07	7.2835e-06
ENSMUSG00000017144	Rnd3	44.4892	2.74438	0.535381	5.12604	2.95896e-07	7.30841e-06
ENSMUSG00000029455	Aldh2	1570.74	-0.897836	0.175297	-5.12181	3.02618e-07	7.46338e-06
ENSMUSG00000041164	Zmiz2	831.495	0.717891	0.140261	5.11824	3.08403e-07	7.59483e-06
ENSMUSG00000023456	Tpi1	1208.25	0.853485	0.166799	5.11685	3.10677e-07	7.63954e-06
ENSMUSG00000022108	Itm2b	7031.31	0.648452	0.126742	5.1163	3.11591e-07	7.65072e-06
ENSMUSG00000030067	Foxp1	4783.53	-0.590959	0.115523	-5.11549	3.12934e-07	7.67242e-06
ENSMUSG00000047250	Ptgs1	120.652	5.90831	1.15562	5.11267	3.17638e-07	7.77631e-06
ENSMUSG00000016024	Lbp	38.3234	-3.01373	0.589611	-5.11139	3.19802e-07	7.81779e-06
ENSMUSG00000027200	Sema6d	25.4927	6.30086	1.23318	5.10943	3.23131e-07	7.88761e-06
ENSMUSG00000022500	Litaf	409.957	0.996407	0.195043	5.10866	3.24448e-07	7.89663e-06
ENSMUSG00000093507	Gm20627	21.8931	6.08338	1.19079	5.10869	3.24404e-07	7.89663e-06
ENSMUSG00000047368	Abhd17b	1669.06	-0.631292	0.123592	-5.10787	3.25805e-07	7.91811e-06
ENSMUSG00000026807	Ak8	38.9192	2.76619	0.541884	5.10476	3.31207e-07	8.03263e-06
ENSMUSG00000027332	Ivd	394.13	-0.844823	0.165502	-5.10461	3.31481e-07	8.03263e-06
ENSMUSG00000024065	Ehd3	102.977	1.57492	0.30877	5.1006	3.38573e-07	8.19258e-06
ENSMUSG00000091370	5730435O14Rik	14.1068	7.3402	1.43921	5.10017	3.39341e-07	8.19927e-06
ENSMUSG00000035314	Gdpd5	34.869	3.77794	0.740948	5.09879	3.41834e-07	8.24756e-06
ENSMUSG00000086236	5830418P13Rik	1003.75	-0.865354	0.169845	-5.09498	3.48787e-07	8.40315e-06
ENSMUSG00000039145	Camk1d	389.963	1.37681	0.270335	5.09298	3.52471e-07	8.47965e-06
ENSMUSG00000022901	Cd86	68.2956	9.61527	1.88834	5.09191	3.54469e-07	8.51544e-06
ENSMUSG00000025236	Adpgk	254.372	1.206	0.237379	5.08047	3.76512e-07	9.03195e-06
ENSMUSG00000105439	RP24-418J2.4	15.8055	7.50517	1.47741	5.07996	3.77513e-07	9.04296e-06
ENSMUSG00000026809	1700026L06Rik	58.3193	2.74867	0.541274	5.07815	3.81121e-07	9.10321e-06
ENSMUSG00000031073	Fgf15	24.7398	5.63783	1.11018	5.07831	3.80812e-07	9.10321e-06
ENSMUSG00000017607	Tns4	23.1795	6.23929	1.23002	5.0725	3.92614e-07	9.36103e-06
ENSMUSG00000103706	6820402A03Rik	113.46	-1.65587	0.326454	-5.0723	3.93037e-07	9.36103e-06
ENSMUSG00000022505	Emp2	16.4017	7.55885	1.49076	5.07045	3.96867e-07	9.43876e-06
ENSMUSG00000036054	Sugp2	546.159	-0.836097	0.165004	-5.06714	4.0384e-07	9.59092e-06
ENSMUSG00000042228	Lyn	808.993	0.793219	0.156659	5.06333	4.11991e-07	9.77057e-06
ENSMUSG00000042842	Serpinb6b	1071.59	0.873755	0.172615	5.06186	4.15186e-07	9.83237e-06
ENSMUSG00000052684	Jun	321.5	1.1369	0.224623	5.06138	4.16241e-07	9.84336e-06
ENSMUSG00000026389	Steap3	125.487	-1.61355	0.318821	-5.06098	4.171e-07	9.84971e-06
ENSMUSG00000026554	Dcaf8	1674.01	-0.578743	0.114362	-5.06061	4.17924e-07	9.85521e-06
ENSMUSG00000030217	Art4	78.01	-1.8856	0.372896	-5.05664	4.26697e-07	1.00479e-05
ENSMUSG00000008193	Spib	84.4517	1.77191	0.350787	5.05124	4.38941e-07	1.03216e-05
ENSMUSG00000081534	Slc48a1	1183.62	-0.633848	0.125497	-5.05072	4.40158e-07	1.03356e-05
ENSMUSG00000025498	Irf7	164.139	1.67336	0.331741	5.04417	4.55493e-07	1.06807e-05
ENSMUSG00000028677	Rnf220	1393.04	-0.618791	0.122851	-5.03691	4.73112e-07	1.10783e-05
ENSMUSG00000020205	Phlda1	89.2304	2.13548	0.424057	5.03582	4.75809e-07	1.11258e-05
ENSMUSG00000064023	Klk8	102.925	-1.69689	0.337151	-5.03304	4.82763e-07	1.12726e-05
ENSMUSG00000001334	Fndc5	27.8046	4.14197	0.823326	5.03078	4.88485e-07	1.13902e-05
ENSMUSG00000001542	Ell2	129.664	1.57447	0.313153	5.0278	4.96132e-07	1.15524e-05
ENSMUSG00000037972	Snn	569.451	-0.771836	0.153547	-5.02672	4.98951e-07	1.16018e-05
ENSMUSG00000085109	Gm15356	26.5758	3.46773	0.690489	5.02214	5.10982e-07	1.1865e-05
ENSMUSG00000065911	Gm24447	119.01	1.55339	0.309498	5.01906	5.19242e-07	1.20401e-05
ENSMUSG00000044867	Gimap1os	325.418	0.921779	0.183729	5.01706	5.24687e-07	1.21494e-05
ENSMUSG00000026239	Pde6d	135.447	1.43274	0.285807	5.01296	5.35987e-07	1.23939e-05
ENSMUSG00000053158	Fes	424.762	0.974545	0.194726	5.00471	5.59472e-07	1.2919e-05
ENSMUSG00000060791	Gmfg	2926.16	-0.668035	0.133569	-5.00142	5.69085e-07	1.31228e-05
ENSMUSG00000097971	Gm26917	1677.62	0.699732	0.139919	5.00098	5.70391e-07	1.31347e-05
ENSMUSG00000029275	Gfi1	291.844	-1.05553	0.211152	-4.99892	5.76535e-07	1.32397e-05
ENSMUSG00000035126	Wdr78	169.792	-1.33883	0.267809	-4.99918	5.75755e-07	1.32397e-05
ENSMUSG00000029102	Hgfac	74.1268	1.99208	0.398627	4.99734	5.81262e-07	1.33299e-05
ENSMUSG00000021365	Nedd9	606.285	0.80732	0.161597	4.9959	5.85621e-07	1.34114e-05
ENSMUSG00000029994	Anxa4	298.318	1.29753	0.259922	4.99201	5.97546e-07	1.3647e-05
ENSMUSG00000040524	Zfp609	168.435	-1.278	0.256007	-4.99206	5.97375e-07	1.3647e-05
ENSMUSG00000030103	Bhlhe40	629.379	1.07909	0.216328	4.9882	6.09437e-07	1.38995e-05
ENSMUSG00000022353	Mtss1	441.564	1.03278	0.207085	4.98721	6.12583e-07	1.39522e-05
ENSMUSG00000086862	Gm13546	91.4092	6.53161	1.3102	4.98521	6.18961e-07	1.40782e-05
ENSMUSG00000103883	Gm37010	383.421	-0.939557	0.18875	-4.97779	6.43136e-07	1.46081e-05
ENSMUSG00000066800	Rnasel	1157.48	-0.674211	0.135459	-4.97722	6.45045e-07	1.46315e-05
ENSMUSG00000044156	Hepacam2	14.6104	7.39183	1.48606	4.97412	6.55451e-07	1.48474e-05
ENSMUSG00000024776	Stambpl1	89.6215	-1.79737	0.361402	-4.97333	6.58135e-07	1.4888e-05
ENSMUSG00000017561	Crlf3	1520.52	-0.63869	0.128439	-4.9727	6.60266e-07	1.49159e-05
ENSMUSG00000036006	Fam65b	1531.48	-0.668378	0.134596	-4.96581	6.84156e-07	1.54347e-05
ENSMUSG00000022157	Mcpt8	186.122	1.87618	0.37817	4.96121	7.00569e-07	1.57836e-05
ENSMUSG00000022861	Dgkg	258.766	-1.5798	0.318462	-4.96071	7.02364e-07	1.58027e-05
ENSMUSG00000062127	Cttnbp2nl	21.3473	6.966	1.40488	4.95844	7.10622e-07	1.5967e-05
ENSMUSG00000025223	Ldb1	773.643	-1.04917	0.211686	-4.95626	7.18623e-07	1.6125e-05
ENSMUSG00000075010	AW112010	996.481	1.91788	0.387258	4.95247	7.32791e-07	1.64208e-05
ENSMUSG00000041460	Cacna2d4	68.2192	-2.04211	0.412462	-4.95102	7.38261e-07	1.65212e-05
ENSMUSG00000027708	Dcun1d1	1149.46	-0.693129	0.140014	-4.95041	7.40567e-07	1.65506e-05
ENSMUSG00000067750	Khdc1a	1400.56	-0.567182	0.114592	-4.94959	7.43717e-07	1.65987e-05
ENSMUSG00000014361	Mertk	13.7247	7.30085	1.47618	4.94578	7.58387e-07	1.69017e-05
ENSMUSG00000020419	Hormad2	46.5105	2.90194	0.58678	4.94554	7.59318e-07	1.69017e-05
ENSMUSG00000020315	Sptbn1	3413.22	-0.507468	0.102684	-4.94202	7.73186e-07	1.71874e-05
ENSMUSG00000024661	Fth1	8384.29	0.522393	0.105762	4.93934	7.83889e-07	1.74021e-05
ENSMUSG00000086534	Gm16758	46.4417	-2.44875	0.496144	-4.93557	7.9917e-07	1.77178e-05
ENSMUSG00000047735	Samd9l	399.754	1.18892	0.240909	4.93514	8.00923e-07	1.77331e-05
ENSMUSG00000033863	Klf9	192.229	1.33656	0.270997	4.93201	8.1389e-07	1.79962e-05
ENSMUSG00000042207	Kdm5b	1691.72	-0.669758	0.135856	-4.9299	8.22711e-07	1.81672e-05
ENSMUSG00000026875	Traf1	197.562	5.51412	1.11887	4.92832	8.29414e-07	1.8291e-05
ENSMUSG00000026980	Ly75	287.854	1.24349	0.252362	4.9274	8.33331e-07	1.83531e-05
ENSMUSG00000053007	Creb5	113.068	1.64988	0.335019	4.92472	8.44801e-07	1.85812e-05
ENSMUSG00000034647	Ankrd12	3850.69	-0.520568	0.10581	-4.91984	8.66148e-07	1.90256e-05
ENSMUSG00000025571	Tnrc6c	1060.4	-0.59696	0.121374	-4.91836	8.72724e-07	1.91309e-05
ENSMUSG00000043230	Fam124b	22.7818	5.08002	1.03289	4.91824	8.73239e-07	1.91309e-05
ENSMUSG00000034266	Batf	96.56	1.80439	0.367058	4.91582	8.84137e-07	1.93443e-05
ENSMUSG00000025529	Zfp711	52.4703	-2.4743	0.503893	-4.91037	9.09063e-07	1.98636e-05
ENSMUSG00000102744	5830444F18Rik	363.705	-0.894402	0.182183	-4.90936	9.13749e-07	1.99398e-05
ENSMUSG00000018500	Adora2b	53.8128	2.35597	0.480133	4.9069	9.25274e-07	2.01542e-05
ENSMUSG00000020780	Srp68	2322.04	-0.593013	0.120857	-4.90675	9.25989e-07	2.01542e-05
ENSMUSG00000066682	Pilrb2	20.2164	4.35226	0.88727	4.90523	9.33184e-07	2.02843e-05
ENSMUSG00000021242	Npc2	2419.69	-0.528495	0.107796	-4.90274	9.45073e-07	2.05068e-05
ENSMUSG00000074170	Plekhf1	57.9412	2.03326	0.414733	4.90258	9.45879e-07	2.05068e-05
ENSMUSG00000047810	Ccdc88b	386.099	1.01051	0.206196	4.90074	9.54749e-07	2.06655e-05
ENSMUSG00000070780	Rbm47	229.576	1.67319	0.341429	4.90055	9.55678e-07	2.06655e-05
ENSMUSG00000005087	Cd44	1448.62	0.79381	0.16213	4.89614	9.77385e-07	2.11075e-05
ENSMUSG00000025473	Adam8	980.234	2.00295	0.40935	4.89299	9.93134e-07	2.14198e-05
ENSMUSG00000074141	Il4i1	118.749	4.15068	0.848837	4.88985	1.00914e-06	2.1737e-05
ENSMUSG00000019188	H13	1896.8	-0.599858	0.122682	-4.88953	1.01077e-06	2.17439e-05
ENSMUSG00000090164	BC035044	944.269	-0.785908	0.160966	-4.88243	1.04784e-06	2.25124e-05
ENSMUSG00000064043	Trerf1	845.965	1.04626	0.214448	4.87887	1.06696e-06	2.28935e-05
ENSMUSG00000022742	Cpox	292.869	0.985966	0.202127	4.87795	1.07194e-06	2.29709e-05
ENSMUSG00000041773	Enc1	131.527	-1.37982	0.282972	-4.87618	1.08162e-06	2.31487e-05
ENSMUSG00000040616	Tmem51	122.535	1.60889	0.330066	4.87445	1.09111e-06	2.33217e-05
ENSMUSG00000038256	Bcl9	363.444	-0.857588	0.175989	-4.87297	1.09932e-06	2.34673e-05
ENSMUSG00000073002	Vamp5	546.869	-1.00883	0.207593	-4.85967	1.1758e-06	2.50676e-05
ENSMUSG00000030427	Lilra6	75.5422	5.56056	1.14504	4.85623	1.19643e-06	2.5475e-05
ENSMUSG00000024696	Lpxn	593.504	0.851649	0.175687	4.84754	1.25002e-06	2.65821e-05
ENSMUSG00000022793	B4galt4	63.0311	-1.87263	0.386859	-4.84061	1.29438e-06	2.74903e-05
ENSMUSG00000001143	Lman2l	478.698	-0.925168	0.191286	-4.83657	1.32101e-06	2.80202e-05
ENSMUSG00000021675	F2rl2	114.112	1.42227	0.294179	4.8347	1.33349e-06	2.82491e-05
ENSMUSG00000020978	Klhdc2	1122.34	0.58078	0.120193	4.83209	1.3511e-06	2.85133e-05
ENSMUSG00000035790	Cep19	352.314	-0.863728	0.178736	-4.83241	1.34887e-06	2.85133e-05
ENSMUSG00000052889	Prkcb	521.494	1.19469	0.247235	4.83222	1.35018e-06	2.85133e-05
ENSMUSG00000033237	Arid2	1777.84	-0.615238	0.127339	-4.83151	1.35505e-06	2.85605e-05
ENSMUSG00000085999	Gm13411	26.2977	3.81637	0.790013	4.83077	1.36003e-06	2.86292e-05
ENSMUSG00000028836	Slc30a2	11.9358	7.10146	1.47063	4.82885	1.37323e-06	2.88707e-05
ENSMUSG00000032336	Nptn	913.653	0.633166	0.131262	4.82367	1.40943e-06	2.95572e-05
ENSMUSG00000056290	Ms4a4b	1537.85	2.15843	0.447446	4.82389	1.40788e-06	2.95572e-05
ENSMUSG00000053477	Tcf4	2440.02	-0.543955	0.112777	-4.8233	1.41205e-06	2.95751e-05
ENSMUSG00000030336	Cd27	1561.85	-0.733509	0.152134	-4.82147	1.42506e-06	2.97567e-05
ENSMUSG00000032330	Cox7a2	2574.84	0.552424	0.114574	4.82155	1.42446e-06	2.97567e-05
ENSMUSG00000040829	Zmynd15	12.7556	7.19476	1.49228	4.82132	1.42608e-06	2.97567e-05
ENSMUSG00000045394	Epcam	38.1044	2.54503	0.527939	4.8207	1.43057e-06	2.98131e-05
ENSMUSG00000038914	Dido1	1517.34	-0.519604	0.107808	-4.81973	1.43755e-06	2.99211e-05
ENSMUSG00000051682	Treml4	25.645	4.39926	0.913612	4.81524	1.47021e-06	3.05628e-05
ENSMUSG00000015316	Slamf1	102.336	2.03782	0.423565	4.81112	1.50085e-06	3.11609e-05
ENSMUSG00000032480	Dhx30	690.999	-0.681057	0.141672	-4.80728	1.53e-06	3.17266e-05
ENSMUSG00000022148	Fyb	4289.42	0.477081	0.0992474	4.80699	1.53222e-06	3.17332e-05
ENSMUSG00000025964	Adam23	49.9146	9.16302	1.90722	4.80437	1.55236e-06	3.21104e-05
ENSMUSG00000046447	Camk2n1	43.264	2.58825	0.539019	4.80178	1.57263e-06	3.24894e-05
ENSMUSG00000095620	2010005H15Rik	63.393	9.50782	1.98229	4.79637	1.61564e-06	3.32953e-05
ENSMUSG00000106734	RP24-328P2.5	77.6365	2.64381	0.551184	4.79661	1.61374e-06	3.32953e-05
ENSMUSG00000003849	Nqo1	325.751	0.980893	0.204533	4.79578	1.62046e-06	3.33124e-05
ENSMUSG00000036961	Wnt8b	20.5182	4.02055	0.838319	4.79596	1.61895e-06	3.33124e-05
ENSMUSG00000018821	Avpi1	172.039	1.57072	0.327556	4.79528	1.6245e-06	3.33544e-05
ENSMUSG00000028664	Ephb2	401.779	-0.899768	0.187769	-4.7919	1.65212e-06	3.38796e-05
ENSMUSG00000039316	Rftn1	340.544	1.11915	0.233675	4.78935	1.67326e-06	3.4271e-05
ENSMUSG00000033777	Tlr13	13.5705	7.28537	1.52249	4.78515	1.70856e-06	3.4951e-05
ENSMUSG00000065954	Tacc1	2456.84	-0.526989	0.110143	-4.78458	1.71349e-06	3.5009e-05
ENSMUSG00000064337	mt-Rnr1	54639.1	-0.379684	0.079367	-4.78391	1.71922e-06	3.5083e-05
ENSMUSG00000021460	Auh	439.748	0.829603	0.173471	4.78237	1.73237e-06	3.53081e-05
ENSMUSG00000042476	Abcb4	37.7647	-2.56348	0.536441	-4.77869	1.76444e-06	3.59125e-05
ENSMUSG00000050108	Bpifc	272.955	-1.38811	0.290493	-4.77847	1.76633e-06	3.59125e-05
ENSMUSG00000040557	Wbscr27	279.876	-0.969843	0.203013	-4.77724	1.77717e-06	3.60889e-05
ENSMUSG00000039096	Rsad1	207.029	1.34679	0.281954	4.77664	1.7825e-06	3.61531e-05
ENSMUSG00000033161	Atp1a1	8823.46	-0.605213	0.126749	-4.77489	1.79806e-06	3.64245e-05
ENSMUSG00000077273	Gm22779	26.8881	3.24164	0.679152	4.77307	1.81441e-06	3.67109e-05
ENSMUSG00000044330	Gm9790	341.026	0.918225	0.192458	4.77105	1.8327e-06	3.70361e-05
ENSMUSG00000062300	Pvrl2	36.7761	3.06725	0.643727	4.76484	1.89008e-06	3.81494e-05
ENSMUSG00000004633	Chn2	262.522	1.37579	0.288876	4.76256	1.91149e-06	3.85349e-05
ENSMUSG00000033454	Zbtb1	782.793	-0.654985	0.137829	-4.75214	2.01277e-06	4.05276e-05
ENSMUSG00000028792	Ak2	2118.1	0.594958	0.125232	4.75085	2.0256e-06	4.07369e-05
ENSMUSG00000020182	Ddc	184.379	1.27223	0.268316	4.74155	2.1209e-06	4.2602e-05
ENSMUSG00000059639	Clec4a4	13.2807	7.25491	1.53037	4.74063	2.13059e-06	4.27452e-05
ENSMUSG00000074994	Qser1	630.132	-0.859556	0.181351	-4.73974	2.13998e-06	4.28818e-05
ENSMUSG00000023272	Creld2	193.066	1.1958	0.252498	4.73586	2.18123e-06	4.36561e-05
ENSMUSG00000003363	Pld3	255.618	1.25642	0.265477	4.7327	2.21554e-06	4.42896e-05
ENSMUSG00000060131	Atp8b4	4159.18	-0.531141	0.112371	-4.72668	2.28215e-06	4.55666e-05
ENSMUSG00000020263	Appl2	311.442	0.891229	0.18859	4.72574	2.29275e-06	4.57234e-05
ENSMUSG00000005947	Itgae	499.002	2.24997	0.476544	4.72143	2.34187e-06	4.66471e-05
ENSMUSG00000075269	Bex6	468.829	-0.943448	0.19986	-4.72055	2.35213e-06	4.67956e-05
ENSMUSG00000040483	Xaf1	104.362	1.41658	0.300307	4.7171	2.39229e-06	4.75378e-05
ENSMUSG00000033717	Adra2a	11.5899	7.05903	1.49856	4.71052	2.47081e-06	4.90397e-05
ENSMUSG00000048779	P2ry6	11.2835	7.01868	1.49275	4.70183	2.57836e-06	5.11134e-05
ENSMUSG00000070469	Adamtsl3	50.2059	2.57889	0.548529	4.70147	2.58295e-06	5.11437e-05
ENSMUSG00000076755	Tcrg-V1	643.411	0.779126	0.165788	4.69952	2.60775e-06	5.15734e-05
ENSMUSG00000022472	Desi1	976.908	-0.60879	0.129554	-4.69912	2.61287e-06	5.16135e-05
ENSMUSG00000005667	Mthfd2	1186.41	0.638804	0.1361	4.69365	2.6837e-06	5.29499e-05
ENSMUSG00000024197	Plin3	836.436	-0.664187	0.141519	-4.69326	2.68888e-06	5.29894e-05
ENSMUSG00000022024	Sugt1	1303.59	0.70168	0.149604	4.69026	2.72864e-06	5.37095e-05
ENSMUSG00000030468	Siglecg	156.547	4.21952	0.89976	4.68961	2.73733e-06	5.38169e-05
ENSMUSG00000021280	Exoc3l4	11.959	7.10123	1.51541	4.68602	2.7857e-06	5.47034e-05
ENSMUSG00000050014	Apol10b	36.4934	8.71146	1.85924	4.68549	2.79288e-06	5.47798e-05
ENSMUSG00000022673	Mcm4	1847.07	0.528365	0.112825	4.68303	2.82671e-06	5.53783e-05
ENSMUSG00000025810	Nrp1	213.092	1.02744	0.219419	4.68256	2.83315e-06	5.54393e-05
ENSMUSG00000033538	Casp4	206.265	1.19491	0.255214	4.68199	2.8411e-06	5.55297e-05
ENSMUSG00000036533	Cdc42ep3	657.12	-0.89185	0.190632	-4.67838	2.89146e-06	5.64478e-05
ENSMUSG00000001281	Itgb7	1428.58	0.774802	0.165674	4.67665	2.916e-06	5.68604e-05
ENSMUSG00000066687	Zbtb16	295.802	1.2614	0.269808	4.67519	2.93682e-06	5.71994e-05
ENSMUSG00000015305	Sash1	147.487	1.57642	0.337297	4.6737	2.95821e-06	5.75487e-05
ENSMUSG00000025279	Dnase1l3	27.1273	3.2406	0.693832	4.67059	3.00343e-06	5.83603e-05
ENSMUSG00000079173	Zan	29.8786	-2.78762	0.596999	-4.66939	3.02092e-06	5.86318e-05
ENSMUSG00000031488	Rab11fip1	170.331	1.43484	0.30763	4.66418	3.09853e-06	6.00682e-05
ENSMUSG00000037876	Jmjd1c	1428.66	-0.523373	0.112473	-4.65332	3.26635e-06	6.31747e-05
ENSMUSG00000041530	Ago1	474.616	-0.76999	0.165466	-4.65347	3.26402e-06	6.31747e-05
ENSMUSG00000029291	Rufy3	515.311	-0.762266	0.163865	-4.65178	3.29076e-06	6.3573e-05
ENSMUSG00000058624	Gda	28.2497	2.9537	0.635492	4.6479	3.35329e-06	6.47061e-05
ENSMUSG00000032402	Smad3	397.523	-0.953213	0.205189	-4.64555	3.39179e-06	6.53733e-05
ENSMUSG00000079071	Gm14085	190.244	-1.53374	0.330936	-4.63456	3.57706e-06	6.88645e-05
ENSMUSG00000066306	Numa1	1716.63	-0.551934	0.119098	-4.6343	3.58151e-06	6.88708e-05
ENSMUSG00000022479	Vdr	98.625	1.76341	0.380605	4.63318	3.60098e-06	6.91654e-05
ENSMUSG00000020572	Nampt	628.365	0.877956	0.189532	4.63222	3.6177e-06	6.94065e-05
ENSMUSG00000036503	Rnf13	899.621	-0.640098	0.138193	-4.63191	3.623e-06	6.94284e-05
ENSMUSG00000024399	Ltb	349.763	1.09399	0.23626	4.63044	3.64885e-06	6.98435e-05
ENSMUSG00000011589	Fsd1	10.3636	6.8967	1.48975	4.62943	3.66681e-06	7.00264e-05
ENSMUSG00000102808	5430420F09Rik	129.83	-1.44124	0.311308	-4.62965	3.66293e-06	7.00264e-05
ENSMUSG00000024867	Pip5k1b	65.6398	-2.10525	0.455118	-4.62572	3.73297e-06	7.12084e-05
ENSMUSG00000073728	Tmem51os1	10.6485	6.93634	1.49993	4.62445	3.7559e-06	7.15638e-05
ENSMUSG00000060166	Zdhhc8	1116.65	-0.811282	0.17546	-4.62375	3.76862e-06	7.17242e-05
ENSMUSG00000030257	Srgap3	209.565	1.36098	0.294868	4.61558	3.92007e-06	7.45216e-05
ENSMUSG00000022765	Snap29	409.087	0.763953	0.165537	4.61501	3.93084e-06	7.46412e-05
ENSMUSG00000028248	Pnisr	8354.09	-0.38319	0.0830401	-4.61451	3.94019e-06	7.47336e-05
ENSMUSG00000027508	Pag1	1612.26	-0.587834	0.127423	-4.61325	3.96423e-06	7.51041e-05
ENSMUSG00000099930	Gm2396	10.5438	6.91782	1.50032	4.6109	4.00938e-06	7.58733e-05
ENSMUSG00000036186	Fam69b	310.697	-1.18227	0.256445	-4.61025	4.0219e-06	7.60239e-05
ENSMUSG00000056498	Tmem154	318.95	1.00102	0.217307	4.60647	4.09564e-06	7.73302e-05
ENSMUSG00000020009	Ifngr1	927.511	0.858621	0.186411	4.60606	4.10379e-06	7.73963e-05
ENSMUSG00000072244	Trim6	93.1113	-1.62719	0.353347	-4.60509	4.12286e-06	7.76681e-05
ENSMUSG00000029417	Cxcl9	11.2766	7.01781	1.52421	4.60422	4.14005e-06	7.7904e-05
ENSMUSG00000062901	Klhl24	787.409	-0.837588	0.182012	-4.60182	4.18811e-06	7.87196e-05
ENSMUSG00000026390	Marco	10.5526	6.92256	1.50601	4.59663	4.29379e-06	8.0615e-05
ENSMUSG00000023034	Nr4a1	119.752	1.47968	0.321959	4.59588	4.30933e-06	8.08157e-05
ENSMUSG00000035868	3110052M02Rik	98.8112	1.8085	0.393665	4.59401	4.34802e-06	8.14497e-05
ENSMUSG00000044811	AF251705	29.3392	3.27238	0.7131	4.58895	4.45479e-06	8.3356e-05
ENSMUSG00000026024	Als2	195.229	-1.18709	0.258715	-4.58841	4.46628e-06	8.34774e-05
ENSMUSG00000031799	Tpm4	1394.61	0.904628	0.197274	4.58564	4.52595e-06	8.44035e-05
ENSMUSG00000035376	Hacd2	441.313	1.06476	0.232187	4.5858	4.52256e-06	8.44035e-05
ENSMUSG00000101892	9130401M01Rik	341.448	0.932794	0.203644	4.58051	4.63835e-06	8.64029e-05
ENSMUSG00000085786	Gm15987	75.3901	2.13561	0.466489	4.57805	4.6932e-06	8.73271e-05
ENSMUSG00000026094	Stk17b	1377.7	0.579827	0.126858	4.57068	4.86145e-06	9.03569e-05
ENSMUSG00000022123	Scel	15.9914	6.55028	1.43331	4.57004	4.87631e-06	9.05321e-05
ENSMUSG00000031021	Tmem9b	187.422	1.39721	0.305794	4.56912	4.89776e-06	9.08292e-05
ENSMUSG00000025997	Ikzf2	3045.77	0.52004	0.113856	4.56753	4.93497e-06	9.14176e-05
ENSMUSG00000000409	Lck	2603.3	-0.503985	0.110367	-4.56646	4.96029e-06	9.17846e-05
ENSMUSG00000024858	Adrbk1	1757.36	-0.468824	0.102707	-4.56466	5.00296e-06	9.24716e-05
ENSMUSG00000012889	Podnl1	294.808	1.03917	0.227705	4.56367	5.02677e-06	9.28087e-05
ENSMUSG00000034781	Gna11	334.528	0.847298	0.185781	4.56073	5.09749e-06	9.40104e-05
ENSMUSG00000027339	Rassf2	1211.95	-0.53296	0.116883	-4.55978	5.12074e-06	9.43349e-05
ENSMUSG00000072915	Gm12258	147.282	-1.40389	0.308025	-4.55772	5.17109e-06	9.51571e-05
ENSMUSG00000040618	Pck2	562.59	-0.704107	0.154542	-4.55608	5.21177e-06	9.58e-05
ENSMUSG00000003948	Mmd	369.259	1.06017	0.233027	4.54957	5.37559e-06	9.87024e-05
ENSMUSG00000022048	Dpysl2	976.678	0.720149	0.158309	4.549	5.39013e-06	9.88605e-05
ENSMUSG00000032413	Rasa2	433.552	0.793966	0.174558	4.54845	5.40424e-06	9.90104e-05
ENSMUSG00000053931	Cnn3	595.828	-1.03736	0.228109	-4.54764	5.42502e-06	9.92821e-05
ENSMUSG00000038805	Six3	48.3813	-2.00441	0.441318	-4.54186	5.57593e-06	0.000101932
ENSMUSG00000038502	Ptov1	612.3	-0.703671	0.155119	-4.53634	5.72377e-06	0.00010452
ENSMUSG00000019102	Aldh3a1	20.8702	5.99084	1.32088	4.53548	5.7472e-06	0.00010478
ENSMUSG00000022769	Sdf2l1	379.659	0.85394	0.188285	4.53536	5.75058e-06	0.00010478
ENSMUSG00000024544	Ldlrad4	400.441	-0.844997	0.186381	-4.53371	5.79563e-06	0.000105364
ENSMUSG00000030681	Mvp	172.401	1.47001	0.324255	4.53349	5.80157e-06	0.000105364
ENSMUSG00000034764	1700006J14Rik	9.82992	6.8186	1.50391	4.5339	5.79046e-06	0.000105364
ENSMUSG00000032946	Rasgrp2	2048.7	-1.65711	0.365603	-4.53255	5.8277e-06	0.000105723
ENSMUSG00000044150	A830080D01Rik	541.184	-0.767474	0.169357	-4.53168	5.85154e-06	0.00010604
ENSMUSG00000020901	Pik3r5	360.576	1.25094	0.276098	4.53079	5.87634e-06	0.000106374
ENSMUSG00000024334	H2-Oa	161.138	1.43496	0.317166	4.52432	6.05889e-06	0.00010956
ENSMUSG00000028341	Nr4a3	79.5187	5.29109	1.16981	4.52305	6.09561e-06	0.000110104
ENSMUSG00000026385	Dbi	1874.57	0.585474	0.129623	4.51676	6.27919e-06	0.000113297
ENSMUSG00000046731	Kctd11	98.5854	1.54775	0.342998	4.5124	6.40971e-06	0.000115527
ENSMUSG00000026921	Egfl7	73.0166	-1.77639	0.393731	-4.51169	6.43132e-06	0.000115792
ENSMUSG00000038604	Fam65a	1935.35	-0.785307	0.17409	-4.51092	6.45473e-06	0.000116088
ENSMUSG00000018169	Mfng	414.191	-0.831833	0.18444	-4.51006	6.48108e-06	0.000116436
ENSMUSG00000039191	Rbpj	1377.92	0.736574	0.163472	4.50582	6.6116e-06	0.000118653
ENSMUSG00000031101	Sash3	1248.81	-0.517537	0.114877	-4.50513	6.63337e-06	0.000118916
ENSMUSG00000014496	Ankrd28	393.355	-1.21561	0.27004	-4.50158	6.74507e-06	0.000120788
ENSMUSG00000029530	Ccr9	172.467	1.10163	0.244777	4.50055	6.77787e-06	0.000121245
ENSMUSG00000053559	Smagp	15.3883	6.49397	1.44417	4.49669	6.90193e-06	0.000123332
ENSMUSG00000059336	Slc14a1	620.824	-0.725711	0.161399	-4.49638	6.91211e-06	0.000123382
ENSMUSG00000042363	Lgalsl	13.99	6.35356	1.4139	4.49363	7.00192e-06	0.000124851
ENSMUSG00000031901	Dus2	108.562	1.83547	0.408759	4.49035	7.11052e-06	0.000126652
ENSMUSG00000059182	Skap2	643.891	0.955662	0.212853	4.48978	7.12953e-06	0.000126855
ENSMUSG00000087259	2610035D17Rik	170.718	-1.18855	0.264787	-4.48872	7.16534e-06	0.000127357
ENSMUSG00000035828	Pim3	428.784	0.850941	0.189638	4.48719	7.21693e-06	0.000128137
ENSMUSG00000028654	Mycl	26.9392	3.31545	0.739645	4.48249	7.37788e-06	0.000130735
ENSMUSG00000076441	Ass1	189.758	-1.04229	0.232527	-4.48245	7.37895e-06	0.000130735
ENSMUSG00000033107	Rnf125	149.893	1.19213	0.266032	4.48115	7.42403e-06	0.000131394
ENSMUSG00000074800	Gm4149	971.751	-0.636941	0.142166	-4.48027	7.45497e-06	0.000131802
ENSMUSG00000059714	Flot1	678.801	-0.683719	0.152681	-4.4781	7.53105e-06	0.000133006
ENSMUSG00000017737	Mmp9	17.639	4.14483	0.926232	4.47494	7.64334e-06	0.000134846
ENSMUSG00000051890	Klhdc1	155.134	-1.09646	0.245236	-4.47104	7.78403e-06	0.000137183
ENSMUSG00000085971	Gm15411	239.855	-1.28998	0.288707	-4.46813	7.8905e-06	0.000138913
ENSMUSG00000032290	Ptpn9	185.014	1.20224	0.269101	4.46761	7.90989e-06	0.000139107
ENSMUSG00000030852	Tacc2	219.903	-1.09688	0.245852	-4.46155	8.1369e-06	0.000142949
ENSMUSG00000025375	Aatk	58.7171	1.84465	0.4135	4.46106	8.1555e-06	0.000143125
ENSMUSG00000061119	Prcp	276.032	1.13827	0.255234	4.4597	8.20727e-06	0.000143882
ENSMUSG00000022013	Dnajc15	453.288	0.777683	0.174489	4.45691	8.315e-06	0.000145617
ENSMUSG00000027111	Itga6	1574.91	-0.765876	0.171849	-4.45667	8.32424e-06	0.000145626
ENSMUSG00000026074	Map4k4	3610.33	-0.415008	0.0932057	-4.45261	8.48336e-06	0.000148254
ENSMUSG00000069633	Pex11g	334.46	-0.88849	0.199669	-4.44981	8.59465e-06	0.000149885
ENSMUSG00000079852	Klra4	30.0024	2.71134	0.609303	4.44991	8.5908e-06	0.000149885
ENSMUSG00000105940	RP23-458G12.1	38.0616	-2.25072	0.506502	-4.44366	8.84431e-06	0.000154078
ENSMUSG00000026004	Kansl1l	337.489	-0.975811	0.219691	-4.44174	8.92337e-06	0.000155293
ENSMUSG00000022105	Rb1	409.285	0.869288	0.195803	4.43961	9.01208e-06	0.000156673
ENSMUSG00000038976	Ppp1r9b	502.644	-0.676596	0.152495	-4.43685	9.12839e-06	0.00015853
ENSMUSG00000004359	Spic	10.3496	6.89615	1.55559	4.43315	9.2865e-06	0.000161108
ENSMUSG00000005873	Reep5	665.241	0.829103	0.187061	4.43226	9.32489e-06	0.000161438
ENSMUSG00000024413	Npc1	617.263	-0.773547	0.174518	-4.43248	9.31571e-06	0.000161438
ENSMUSG00000022136	Dnajc3	1712.59	0.645459	0.145686	4.43049	9.40178e-06	0.0001626
ENSMUSG00000004814	Ccl24	67.3684	6.90157	1.55904	4.42681	9.5635e-06	0.000165226
ENSMUSG00000070323	Mmp27	9.9625	6.84176	1.54877	4.41755	9.98255e-06	0.000172109
ENSMUSG00000097119	B230354K17Rik	515.135	-0.699202	0.158274	-4.41765	9.97787e-06	0.000172109
ENSMUSG00000020476	Dbnl	1120.76	0.704128	0.15942	4.4168	1.00172e-05	0.000172527
ENSMUSG00000098120	Gm5914	233.733	-0.981141	0.222296	-4.41366	1.01638e-05	0.000174872
ENSMUSG00000059895	Ptp4a3	684.577	-0.659019	0.149502	-4.4081	1.0428e-05	0.000179232
ENSMUSG00000020474	Polm	52.2184	2.14225	0.486154	4.40652	1.05043e-05	0.000180083
ENSMUSG00000032193	Ldlr	1142.59	0.532845	0.120925	4.40641	1.05099e-05	0.000180083
ENSMUSG00000076757	Tcrg-C4	10715.1	-0.560667	0.127229	-4.40675	1.04934e-05	0.000180083
ENSMUSG00000049288	Lix1l	35.7982	-2.3794	0.54093	-4.39872	1.08891e-05	0.000186389
ENSMUSG00000047907	Tshz2	203.347	-1.20704	0.274481	-4.39753	1.0949e-05	0.000187222
ENSMUSG00000021709	Erbb2ip	2338.14	-0.665727	0.151403	-4.39704	1.09738e-05	0.000187415
ENSMUSG00000031304	Il2rg	1816.55	0.715881	0.162816	4.39686	1.09827e-05	0.000187415
ENSMUSG00000043065	Spice1	278.45	-0.862234	0.196127	-4.39631	1.10106e-05	0.000187697
ENSMUSG00000063524	Eno1	348.607	0.923052	0.209994	4.39562	1.10457e-05	0.000188104
ENSMUSG00000044468	Fam46c	11.7743	7.08097	1.61115	4.39498	1.10783e-05	0.000188467
ENSMUSG00000016427	Ndufa1	1147.65	0.6267	0.142607	4.39459	1.10983e-05	0.000188614
ENSMUSG00000027447	Cst3	3346.19	3.14241	0.715149	4.39407	1.1125e-05	0.000188876
ENSMUSG00000029471	Camkk2	2478.56	-0.447563	0.10188	-4.39303	1.11782e-05	0.000189393
ENSMUSG00000050600	Zfp831	286.723	-0.871362	0.198349	-4.39309	1.11752e-05	0.000189393
ENSMUSG00000032959	Pebp1	1006.65	-0.549283	0.125067	-4.39192	1.12354e-05	0.000190169
ENSMUSG00000069255	Dusp22	54.0116	2.27203	0.518326	4.3834	1.16841e-05	0.000197563
ENSMUSG00000106478	RP23-425N17.3	9.20271	6.72289	1.53502	4.37968	1.18854e-05	0.000200763
ENSMUSG00000015189	Casd1	319.408	-0.823808	0.188174	-4.37789	1.19831e-05	0.000202209
ENSMUSG00000022037	Clu	38.5246	2.64858	0.605544	4.37388	1.22055e-05	0.000205754
ENSMUSG00000084992	Gm13842	59.5286	-1.83933	0.421057	-4.36836	1.25184e-05	0.000210815
ENSMUSG00000042312	S100a13	639.205	0.77836	0.178246	4.36677	1.26095e-05	0.000212135
ENSMUSG00000042655	Fam159b	8.85166	6.66669	1.52797	4.36311	1.28227e-05	0.000215505
ENSMUSG00000026480	Ncf2	563.685	0.754546	0.173002	4.36149	1.29182e-05	0.00021689
ENSMUSG00000015092	Edf1	1344.32	0.637591	0.146235	4.36005	1.30035e-05	0.000218102
ENSMUSG00000103284	3110080O07Rik	342.309	-1.03316	0.237144	-4.35669	1.32046e-05	0.000221253
ENSMUSG00000020649	Rrm2	1014.14	0.524856	0.120481	4.35632	1.32266e-05	0.000221399
ENSMUSG00000020844	Nxn	375.729	0.805177	0.184897	4.35472	1.33237e-05	0.000222801
ENSMUSG00000000791	Il12rb1	279.781	1.03034	0.236666	4.35357	1.3394e-05	0.000223338
ENSMUSG00000035967	Ddx26b	536.972	-0.725076	0.166534	-4.35393	1.33719e-05	0.000223338
ENSMUSG00000040760	Appl1	1644.39	-0.465784	0.10699	-4.35353	1.3396e-05	0.000223338
ENSMUSG00000040329	Il7	11.3998	7.03251	1.61713	4.34877	1.36901e-05	0.000228013
ENSMUSG00000026308	Klhl30	174.427	-1.44796	0.333024	-4.3479	1.37448e-05	0.000228695
ENSMUSG00000030688	Stard10	213.222	-0.910237	0.209369	-4.34752	1.37686e-05	0.000228864
ENSMUSG00000032601	Prkar2a	507.843	0.97145	0.223657	4.34349	1.4024e-05	0.000232876
ENSMUSG00000035064	Eef2k	2033.4	-0.560963	0.129194	-4.34202	1.41178e-05	0.000234201
ENSMUSG00000039682	Lap3	523.883	0.708477	0.163188	4.34147	1.41532e-05	0.000234555
ENSMUSG00000086266	Igf2os	182.786	-1.09705	0.25288	-4.33824	1.43628e-05	0.000237793
ENSMUSG00000036117	Il5	9.51467	6.77498	1.5619	4.33766	1.44009e-05	0.000238186
ENSMUSG00000028214	Gem	26.5099	3.30138	0.761728	4.33406	1.46384e-05	0.000241875
ENSMUSG00000029723	Tsc22d4	1519.3	-0.566188	0.130644	-4.33383	1.46535e-05	0.000241884
ENSMUSG00000024338	Psmb8	4619.35	0.442662	0.102224	4.33032	1.4889e-05	0.000245529
ENSMUSG00000031347	Cetn2	679.934	0.597643	0.138078	4.32829	1.5027e-05	0.000247559
ENSMUSG00000024981	Acsl5	1085.32	0.594717	0.13747	4.32615	1.51736e-05	0.000249652
ENSMUSG00000025931	Paqr8	255.122	-0.927851	0.214482	-4.326	1.5184e-05	0.000249652
ENSMUSG00000001909	Trmt1	1093.1	-0.507298	0.117296	-4.32494	1.52576e-05	0.000250615
ENSMUSG00000021457	Syk	589.033	0.642348	0.148582	4.32318	1.53796e-05	0.00025237
ENSMUSG00000021065	Fut8	2419.44	-0.661772	0.15316	-4.32079	1.55473e-05	0.00025485
ENSMUSG00000057133	Chd6	1156.21	-0.589275	0.136388	-4.32059	1.55612e-05	0.00025485
ENSMUSG00000042265	Trem1	18.3134	4.57236	1.05859	4.31928	1.5654e-05	0.000256117
ENSMUSG00000100029	Gm29440	10.039	6.84891	1.58608	4.31814	1.57353e-05	0.000257194
ENSMUSG00000031309	Rps6ka3	864.671	0.540083	0.125099	4.31723	1.57998e-05	0.000257997
ENSMUSG00000026159	Agfg1	1187.67	0.543409	0.125902	4.31612	1.58795e-05	0.000259044
ENSMUSG00000032575	Manf	1199.71	0.566229	0.13121	4.31543	1.59291e-05	0.000259599
ENSMUSG00000037341	Slc9a7	39.1941	2.25736	0.523123	4.31515	1.59493e-05	0.000259675
ENSMUSG00000017756	Slc12a7	524.804	-0.692036	0.160434	-4.31354	1.60663e-05	0.000261323
ENSMUSG00000035004	Igsf6	34.241	2.92557	0.678793	4.30995	1.63289e-05	0.000265244
ENSMUSG00000055170	Ifng	16.047	5.72016	1.32724	4.30982	1.63391e-05	0.000265244
ENSMUSG00000011752	Pgam1	2349.38	0.53236	0.123844	4.29863	1.71858e-05	0.000278718
ENSMUSG00000025163	Cd7	1264.19	2.12453	0.494308	4.298	1.72349e-05	0.000279243
ENSMUSG00000036461	Elf1	3341.98	-0.573593	0.133505	-4.29642	1.7358e-05	0.000280964
ENSMUSG00000025135	Anapc11	856.698	0.661186	0.154111	4.29032	1.78412e-05	0.000288506
ENSMUSG00000030062	Rpn1	2816.82	0.44205	0.103047	4.28977	1.78854e-05	0.000288727
ENSMUSG00000041132	N4bp2l1	276.857	0.874365	0.203828	4.28972	1.78896e-05	0.000288727
ENSMUSG00000000751	Rpa1	1055.08	0.541279	0.126212	4.28864	1.79774e-05	0.000289864
ENSMUSG00000022779	Top3b	1146.04	-0.795023	0.185424	-4.28759	1.80619e-05	0.000290945
ENSMUSG00000037759	Ptger2	132.248	-1.14285	0.266619	-4.28645	1.81547e-05	0.000292158
ENSMUSG00000025153	Fasn	1262.03	0.503694	0.117518	4.28611	1.81833e-05	0.000292335
ENSMUSG00000079017	Ifi27l2a	235.499	3.10628	0.724913	4.28504	1.82706e-05	0.000293457
ENSMUSG00000008305	Tle1	168.114	-1.02452	0.239124	-4.28448	1.83171e-05	0.000293919
ENSMUSG00000059474	Mbtd1	3556.35	-0.477068	0.111377	-4.28338	1.84076e-05	0.000295088
ENSMUSG00000044827	Tlr1	14.0682	4.40171	1.02816	4.28115	1.85928e-05	0.00029777
ENSMUSG00000034160	Ogt	2292.06	-0.423692	0.0991091	-4.275	1.91135e-05	0.000305815
ENSMUSG00000038119	Cdon	15.9725	3.77256	0.883166	4.27163	1.94052e-05	0.000309888
ENSMUSG00000095041	PISD	1766.26	-0.438385	0.102626	-4.27166	1.94024e-05	0.000309888
ENSMUSG00000087131	Gm16152	161.133	-1.1888	0.278349	-4.27091	1.9468e-05	0.000310594
ENSMUSG00000015224	Cyp2j9	65.3263	-1.66305	0.389581	-4.26882	1.96511e-05	0.000313159
ENSMUSG00000047407	Tgif1	886.768	-0.747426	0.175097	-4.26865	1.96664e-05	0.000313159
ENSMUSG00000027378	Nphp1	56.5817	-2.00866	0.470779	-4.26667	1.98413e-05	0.000315644
ENSMUSG00000031996	Aplp2	135.091	1.38647	0.32504	4.26552	1.99435e-05	0.000316966
ENSMUSG00000036959	Bcorl1	315.365	-0.841884	0.197439	-4.26402	2.00784e-05	0.000318807
ENSMUSG00000024397	Aif1	69.0169	5.74617	1.34804	4.26261	2.02054e-05	0.000320518
ENSMUSG00000022848	Dirc2	23.6307	3.37826	0.792663	4.26192	2.02682e-05	0.000321106
ENSMUSG00000046480	Scn4b	78.6104	-2.04398	0.479607	-4.26177	2.0281e-05	0.000321106
ENSMUSG00000036181	Hist1h1c	519.331	0.822461	0.19301	4.26124	2.03293e-05	0.000321566
ENSMUSG00000039157	Fam102a	396.039	1.0103	0.237214	4.25902	2.05326e-05	0.000324474
ENSMUSG00000093930	Hmgcs1	2386.1	0.432793	0.101628	4.25857	2.05734e-05	0.000324811
ENSMUSG00000024620	Pdgfrb	554.027	-0.993392	0.233325	-4.25755	2.06675e-05	0.000325987
ENSMUSG00000020184	Mdm2	1210.88	0.492801	0.115844	4.254	2.09984e-05	0.000330893
ENSMUSG00000043079	Synpo	25.7875	2.83476	0.666558	4.25283	2.11084e-05	0.000332314
ENSMUSG00000099974	Bcl2a1d	40.2701	7.88704	1.85511	4.25153	2.12315e-05	0.000333936
ENSMUSG00000032724	Abtb2	211.428	-0.972022	0.228949	-4.24558	2.18029e-05	0.0003426
ENSMUSG00000002983	Relb	144.813	3.62146	0.853163	4.24475	2.18838e-05	0.000343547
ENSMUSG00000031770	Herpud1	814.37	0.627532	0.147994	4.24026	2.23261e-05	0.000350161
ENSMUSG00000026458	Ppfia4	26.3427	3.05718	0.72134	4.23819	2.25328e-05	0.00035307
ENSMUSG00000044894	Uqcrq	1916.58	0.477754	0.112752	4.23722	2.26308e-05	0.000354272
ENSMUSG00000048285	Frmd6	237.256	-1.03575	0.244535	-4.23559	2.27955e-05	0.000356516
ENSMUSG00000014686	Ceacam16	48.6661	1.83983	0.434905	4.23042	2.3326e-05	0.000364472
ENSMUSG00000020437	Myo1g	929.378	0.826859	0.195486	4.22976	2.33938e-05	0.000365188
ENSMUSG00000027942	4933434E20Rik	653.28	-0.581453	0.137485	-4.22922	2.34505e-05	0.000365731
ENSMUSG00000073821	8030451A03Rik	13.9174	4.78892	1.13417	4.22241	2.41702e-05	0.000376603
ENSMUSG00000029108	Pcdh7	267.383	-1.0934	0.259201	-4.21836	2.46084e-05	0.000383073
ENSMUSG00000020536	Llgl1	364.253	-0.725391	0.172051	-4.21614	2.48523e-05	0.000386509
ENSMUSG00000043939	A530064D06Rik	8.64773	6.63573	1.57474	4.21385	2.51051e-05	0.000390077
ENSMUSG00000020740	Gga3	790.472	-0.564051	0.133899	-4.21251	2.52544e-05	0.000392032
ENSMUSG00000023764	Sfi1	488.141	-0.685546	0.162767	-4.21183	2.53307e-05	0.00039285
ENSMUSG00000021779	Thrb	278.814	-1.03256	0.245604	-4.20416	2.62049e-05	0.00040603
ENSMUSG00000029649	Pomp	5907.18	0.403991	0.0961368	4.20225	2.64272e-05	0.000409094
ENSMUSG00000028163	Nfkb1	1595.61	0.531391	0.126526	4.19985	2.67096e-05	0.000413082
ENSMUSG00000015671	Psma2	4414.95	0.382063	0.0910137	4.19786	2.69451e-05	0.000416337
ENSMUSG00000076609	Igkc	17.2072	3.98879	0.950746	4.19543	2.72356e-05	0.000420437
ENSMUSG00000028655	Mfsd2a	19.8755	3.64964	0.870577	4.19221	2.76254e-05	0.000425845
ENSMUSG00000035459	Stab2	9.06735	6.70644	1.59978	4.19211	2.7637e-05	0.000425845
ENSMUSG00000025854	Fam20c	11.4435	6.05321	1.44548	4.18768	2.81815e-05	0.000433834
ENSMUSG00000026749	Nek6	175.37	1.28843	0.307746	4.18667	2.83081e-05	0.000435381
ENSMUSG00000023030	Slc11a2	203.755	1.02919	0.245961	4.18437	2.85955e-05	0.000439396
ENSMUSG00000024426	Atat1	320.794	-0.753836	0.180168	-4.18408	2.86329e-05	0.000439565
ENSMUSG00000042851	Zc3h6	412.307	-0.693883	0.16589	-4.1828	2.87946e-05	0.00044164
ENSMUSG00000040225	Prrc2c	9548.74	-0.343051	0.08203	-4.18202	2.8893e-05	0.000442742
ENSMUSG00000020300	Cpeb4	164.657	1.00972	0.242057	4.1714	3.02732e-05	0.000463466
ENSMUSG00000028076	Cd1d1	554.71	-0.701952	0.168302	-4.17078	3.03556e-05	0.000464301
ENSMUSG00000054717	Hmgb2	3221.34	0.412625	0.0990943	4.16396	3.12769e-05	0.000477954
ENSMUSG00000036158	Prickle1	348.823	-0.806346	0.193728	-4.16225	3.15126e-05	0.000481116
ENSMUSG00000036764	Dnajc12	38.7643	2.20931	0.530898	4.16147	3.16212e-05	0.000482331
ENSMUSG00000053080	2700081O15Rik	185.608	-1.07594	0.25872	-4.1587	3.2006e-05	0.000487755
ENSMUSG00000038943	Prc1	991.521	0.526169	0.126533	4.15835	3.20552e-05	0.000488058
ENSMUSG00000035165	Kcne3	25.0495	3.42062	0.823373	4.15441	3.26135e-05	0.000496106
ENSMUSG00000066152	Slc31a2	105.994	1.68561	0.405868	4.15311	3.27989e-05	0.000498471
ENSMUSG00000024910	Ctsw	421.845	0.91456	0.220264	4.15211	3.2942e-05	0.00050019
ENSMUSG00000058101	1700084J12Rik	8.60402	-6.48922	1.56347	-4.15053	3.31706e-05	0.000503202
ENSMUSG00000029561	Oasl2	251.126	1.34003	0.322914	4.1498	3.32766e-05	0.000504352
ENSMUSG00000105139	RP23-288B16.4	21.6142	3.24485	0.782249	4.14811	3.35235e-05	0.000507634
ENSMUSG00000028159	Dapp1	1389.35	-0.54953	0.13253	-4.14646	3.3765e-05	0.000510825
ENSMUSG00000029267	Mtf2	2433.01	-0.519413	0.125447	-4.14049	3.46558e-05	0.000523828
ENSMUSG00000000276	Dgke	410.528	-0.784243	0.18945	-4.13958	3.47936e-05	0.000525434
ENSMUSG00000034947	Tmem106a	49.6659	2.33543	0.56423	4.13915	3.48594e-05	0.000525952
ENSMUSG00000001627	Ifrd1	938.932	0.544113	0.131472	4.13862	3.49406e-05	0.0005267
ENSMUSG00000027952	Pmvk	226.162	1.1879	0.287149	4.13688	3.5206e-05	0.000530221
ENSMUSG00000021486	Prelid1	780.18	0.69537	0.16813	4.13591	3.5355e-05	0.000531985
ENSMUSG00000036905	C1qb	8.64318	6.63492	1.60505	4.13378	3.56848e-05	0.000536463
ENSMUSG00000055994	Nod2	32.8732	2.63448	0.637734	4.131	3.61186e-05	0.000542495
ENSMUSG00000032254	Kif23	897.087	0.550903	0.133373	4.13055	3.61903e-05	0.000543083
ENSMUSG00000061311	Rag1	376.135	1.09383	0.265036	4.12708	3.67392e-05	0.000550328
ENSMUSG00000069662	Marcks	9258.41	-0.359103	0.087009	-4.1272	3.67211e-05	0.000550328
ENSMUSG00000019866	Aim1	52.2041	2.37963	0.577669	4.11938	3.79901e-05	0.000568556
ENSMUSG00000038127	Ccdc50	1387.83	0.637122	0.154696	4.11855	3.81261e-05	0.000570079
ENSMUSG00000023175	Bsg	1269.34	0.556768	0.13521	4.11779	3.82519e-05	0.000571448
ENSMUSG00000030223	Ptpro	9.00296	6.695	1.62805	4.11227	3.9178e-05	0.000584236
ENSMUSG00000041272	Tox	1281.93	0.465745	0.113254	4.11238	3.91594e-05	0.000584236
ENSMUSG00000032580	Rbm5	2326.46	-0.410866	0.0999268	-4.11167	3.9281e-05	0.000585249
ENSMUSG00000064352	mt-Ts1	2939.5	-0.492368	0.11984	-4.10856	3.98137e-05	0.000592656
ENSMUSG00000035277	Arx	1078.59	-1.59367	0.387958	-4.10784	3.99384e-05	0.000593981
ENSMUSG00000016206	H2-M3	180.242	1.17094	0.285105	4.10704	4.00754e-05	0.000595023
ENSMUSG00000106205	RP23-326O2.2	209.099	-0.983382	0.239439	-4.10702	4.00798e-05	0.000595023
ENSMUSG00000029348	Asphd2	8.07922	6.53361	1.59129	4.10586	4.02807e-05	0.000597474
ENSMUSG00000032412	Atp1b3	4919.42	-0.45495	0.110855	-4.10402	4.06037e-05	0.000601729
ENSMUSG00000025260	Hsd17b10	765.376	-0.536376	0.130719	-4.10327	4.07358e-05	0.00060315
ENSMUSG00000053560	Ier2	1449.41	0.566917	0.138283	4.0997	4.13685e-05	0.000611974
ENSMUSG00000040297	Suco	1308.78	-0.47049	0.114784	-4.09892	4.15076e-05	0.000613488
ENSMUSG00000027589	Pcmtd2	535.025	-0.731444	0.178656	-4.09414	4.23736e-05	0.000625733
ENSMUSG00000032187	Smarca4	3542.94	-0.41654	0.101803	-4.09164	4.28325e-05	0.00063195
ENSMUSG00000022973	Synj1	639.901	0.776014	0.189718	4.09035	4.30726e-05	0.00063493
ENSMUSG00000029925	Tbxas1	415.737	-0.657783	0.160894	-4.08829	4.34556e-05	0.00064001
ENSMUSG00000044164	Rnf182	7.99716	-6.38657	1.56307	-4.08593	4.39011e-05	0.000646001
ENSMUSG00000032217	Rnf111	453.786	-0.674003	0.164997	-4.08494	4.40882e-05	0.000648181
ENSMUSG00000031066	Usp11	704.054	-0.596361	0.146018	-4.08416	4.42367e-05	0.000649793
ENSMUSG00000028093	Acp6	291.562	-0.783836	0.19194	-4.08375	4.43138e-05	0.000650352
ENSMUSG00000024006	Stk38	1585.72	-0.473431	0.115948	-4.08313	4.44332e-05	0.000651531
ENSMUSG00000038388	Mpp6	805.397	0.527639	0.129245	4.08246	4.45616e-05	0.000652326
ENSMUSG00000050592	Fam78a	324.85	-0.767662	0.18805	-4.08223	4.46049e-05	0.000652326
ENSMUSG00000073538	E330020D12Rik	94.35	3.84188	0.941097	4.08234	4.45838e-05	0.000652326
ENSMUSG00000031749	St3gal2	602.624	-0.6479	0.15884	-4.07894	4.52424e-05	0.00066107
ENSMUSG00000107061	RP23-329A21.3	828.041	-0.578116	0.141792	-4.07722	4.55778e-05	0.000665387
ENSMUSG00000048251	Bcl11b	8062.93	0.641158	0.157283	4.07645	4.57284e-05	0.000667002
ENSMUSG00000089672	Gp49a	399.253	1.12003	0.274828	4.0754	4.5935e-05	0.00066943
ENSMUSG00000040552	C3ar1	40.7848	2.69856	0.662206	4.07511	4.59918e-05	0.000669673
ENSMUSG00000023143	Nagpa	278.533	0.825391	0.202568	4.07464	4.60861e-05	0.000669875
ENSMUSG00000049571	Cfap46	18.194	-3.44988	0.846633	-4.07482	4.605e-05	0.000669875
ENSMUSG00000023010	Tmbim6	2146.82	0.478151	0.117375	4.0737	4.6273e-05	0.000672007
ENSMUSG00000026827	Gpd2	1456.95	0.499112	0.122605	4.07089	4.68344e-05	0.000679568
ENSMUSG00000022521	Crebbp	2939.73	-0.391396	0.0961706	-4.06981	4.70508e-05	0.000682114
ENSMUSG00000051735	Rinl	771.365	0.603503	0.148303	4.0694	4.71346e-05	0.000682735
ENSMUSG00000033826	Dnah8	138.811	-1.14835	0.282275	-4.0682	4.73769e-05	0.00068565
ENSMUSG00000033066	Gas7	86.1268	4.31748	1.06214	4.06488	4.80578e-05	0.0006949
ENSMUSG00000026131	Dst	271.557	-0.923023	0.227114	-4.06414	4.82103e-05	0.000696501
ENSMUSG00000032370	Lactb	656.22	0.67999	0.167409	4.06185	4.86857e-05	0.000702761
ENSMUSG00000040209	Zfp704	1124.97	-0.617417	0.152071	-4.06006	4.90609e-05	0.000707563
ENSMUSG00000026223	Itm2c	994.717	1.58241	0.390123	4.05618	4.9882e-05	0.000718784
ENSMUSG00000074149	Gm10634	7.51741	6.43279	1.58612	4.05568	4.99887e-05	0.000719699
ENSMUSG00000031431	Tsc22d3	332.005	-0.904629	0.223071	-4.05534	5.00615e-05	0.000720125
ENSMUSG00000030084	Plxna1	34.4096	2.4699	0.609116	4.05488	5.0159e-05	0.000720906
ENSMUSG00000083902	Gm15975	89.8943	1.29403	0.319157	4.05453	5.02359e-05	0.00072139
ENSMUSG00000079056	Kcnip3	15.4121	3.8639	0.953318	4.05311	5.05415e-05	0.000725152
ENSMUSG00000022657	Cd96	475.538	0.857265	0.211608	4.05119	5.09579e-05	0.000730499
ENSMUSG00000020227	Irak3	27.4856	2.67321	0.660323	4.04834	5.15827e-05	0.00073882
ENSMUSG00000001833	2007-09-01	3805.2	0.408905	0.10102	4.04774	5.17138e-05	0.000740062
ENSMUSG00000040652	Oaz2	550.51	-0.590353	0.145931	-4.04542	5.22297e-05	0.000746804
ENSMUSG00000025190	Got1	178.943	1.16796	0.288879	4.04309	5.27508e-05	0.000753609
ENSMUSG00000021575	Ahrr	139.611	3.87896	0.959571	4.04239	5.29082e-05	0.00075521
ENSMUSG00000040270	Bach2	574.348	-0.681323	0.168597	-4.04113	5.31944e-05	0.000758646
ENSMUSG00000097754	Ptgs2os2	7.56751	6.43894	1.59377	4.04007	5.34357e-05	0.000761436
ENSMUSG00000015133	Lrrk1	224.961	2.83958	0.702892	4.03985	5.34861e-05	0.000761503
ENSMUSG00000030096	Slc6a6	1306.54	0.557277	0.137981	4.03879	5.37286e-05	0.000763651
ENSMUSG00000054200	Ffar4	7.987	6.51626	1.61338	4.03889	5.37047e-05	0.000763651
ENSMUSG00000030638	Sh3gl3	45.8406	1.98185	0.491048	4.03597	5.43781e-05	0.000772225
ENSMUSG00000053310	Nrgn	6400.38	0.533494	0.13222	4.0349	5.46265e-05	0.000775092
ENSMUSG00000034158	Lrrc58	2434.37	0.531358	0.131722	4.03393	5.48509e-05	0.000777615
ENSMUSG00000056145	AI504432	935.164	-0.557158	0.138162	-4.03265	5.51506e-05	0.000781199
ENSMUSG00000079528	Clnkos	29.4202	3.11959	0.774332	4.02875	5.6075e-05	0.000793618
ENSMUSG00000044791	Setd2	2909.89	-0.376492	0.0934906	-4.02706	5.64787e-05	0.000798654
ENSMUSG00000037058	Paip2	3390.32	-0.624714	0.155176	-4.02584	5.67717e-05	0.000802117
ENSMUSG00000032649	Colgalt2	7.45846	6.41961	1.59613	4.02199	5.77082e-05	0.000814658
ENSMUSG00000029177	Cenpa	992.112	0.478038	0.118902	4.02044	5.80894e-05	0.000819345
ENSMUSG00000029426	Scarb2	973.157	-0.638661	0.15887	-4.02002	5.81926e-05	0.000820107
ENSMUSG00000044229	Nxpe4	7.71691	6.47028	1.6096	4.01981	5.82463e-05	0.00082017
ENSMUSG00000070305	Mpzl3	20.5474	3.84587	0.957573	4.01627	5.91263e-05	0.000831859
ENSMUSG00000034957	Cebpa	34.6888	-2.53209	0.630724	-4.01458	5.95529e-05	0.000837155
ENSMUSG00000034981	Parm1	122.693	-1.15752	0.288375	-4.01395	5.97114e-05	0.000838676
ENSMUSG00000034792	Gna15	300.181	0.921511	0.229636	4.01292	5.99714e-05	0.000841619
ENSMUSG00000041722	Khdc1c	92.8336	-1.29659	0.323153	-4.01232	6.01242e-05	0.000843053
ENSMUSG00000049723	Mmp12	386.589	7.81458	1.94841	4.01074	6.05293e-05	0.000848021
ENSMUSG00000007613	Tgfbr1	1120.65	0.554873	0.138397	4.0093	6.09001e-05	0.000852499
ENSMUSG00000068921	Dap3	599.318	-0.556646	0.139014	-4.00425	6.22145e-05	0.000870168
ENSMUSG00000026928	Card9	26.9404	3.5211	0.879781	4.00224	6.27447e-05	0.000876848
ENSMUSG00000045326	Fndc7	10.5024	5.9342	1.48378	3.99937	6.35102e-05	0.000886803
ENSMUSG00000078920	Ifi47	1798.63	0.587368	0.146912	3.9981	6.3853e-05	0.000890843
ENSMUSG00000057265	Ccdc176	74.6463	-1.39027	0.347993	-3.9951	6.46679e-05	0.000901457
ENSMUSG00000030107	Usp18	220.077	0.958421	0.239961	3.99408	6.49471e-05	0.000904593
ENSMUSG00000032420	Nt5e	50.6877	1.89461	0.474778	3.99051	6.59309e-05	0.000917529
ENSMUSG00000069862	Rps12-ps9	384.737	-0.801582	0.201235	-3.98331	6.79617e-05	0.000945002
ENSMUSG00000034881	Tbxa2r	100.266	-1.71678	0.431015	-3.98311	6.80201e-05	0.000945025
ENSMUSG00000041417	Pik3r1	2581.44	-0.429292	0.107823	-3.98144	6.84983e-05	0.000950877
ENSMUSG00000026107	Nabp1	540.439	0.83907	0.210756	3.98124	6.85557e-05	0.000950883
ENSMUSG00000026657	Frmd4a	658.414	-0.543955	0.136701	-3.97917	6.9156e-05	0.000958412
ENSMUSG00000022205	Sub1	6368.31	0.448284	0.112681	3.97836	6.93913e-05	0.000960873
ENSMUSG00000002847	Pla1a	123.47	3.73919	0.939992	3.97789	6.95288e-05	0.000961979
ENSMUSG00000034175	Rhbdd3	273.119	-0.805423	0.202506	-3.97729	6.97063e-05	0.000963635
ENSMUSG00000027965	Olfm3	7.73917	6.47178	1.62742	3.97671	6.98753e-05	0.000965171
ENSMUSG00000026581	Sell	3105.58	-0.659769	0.165938	-3.97599	7.00861e-05	0.000966481
ENSMUSG00000046841	Ckap4	244.701	-0.991228	0.249291	-3.97618	7.00304e-05	0.000966481
ENSMUSG00000036432	Siah2	163.313	1.00607	0.25307	3.97545	7.02457e-05	0.000967882
ENSMUSG00000022377	Asap1	639.171	0.846272	0.213118	3.9709	7.16007e-05	0.000985737
ENSMUSG00000083992	Gm11478	646.941	-0.666063	0.167778	-3.9699	7.1903e-05	0.000989081
ENSMUSG00000001847	Rac1	718.31	0.739414	0.186298	3.96898	7.21822e-05	0.000992104
ENSMUSG00000030345	Dyrk4	182.849	-0.976494	0.246139	-3.96725	7.27072e-05	0.000998496
ENSMUSG00000039208	Metrnl	69.5331	1.62835	0.41047	3.96703	7.27752e-05	0.000998607
ENSMUSG00000060802	B2m	31754.9	0.405881	0.102329	3.96644	7.29549e-05	0.000999428
ENSMUSG00000067870	Rpl31-ps8	811.566	-0.635398	0.16019	-3.96654	7.29241e-05	0.000999428
ENSMUSG00000080727	C920021L13Rik	148.618	-0.996921	0.251417	-3.96521	7.33327e-05	0.00100378
ENSMUSG00000074918	Inafm2	506.348	-0.638525	0.16108	-3.96402	7.36978e-05	0.00100795
ENSMUSG00000011179	Odc1	235.016	0.841077	0.212325	3.96127	7.45507e-05	0.00101878
ENSMUSG00000030742	Lat	993.966	-0.639273	0.161525	-3.95772	7.56671e-05	0.00103319
ENSMUSG00000040289	Hey1	511.116	0.787607	0.199023	3.95738	7.57774e-05	0.00103385
ENSMUSG00000015981	Stk32c	16.2353	3.93985	0.995659	3.95702	7.58895e-05	0.00103453
ENSMUSG00000000378	Ccm2	589.407	-0.723756	0.182946	-3.95611	7.61796e-05	0.00103764
ENSMUSG00000050022	Amz1	83.1792	1.50505	0.380497	3.95548	7.63809e-05	0.00103953
ENSMUSG00000073802	Cdkn2b	51.5888	2.41636	0.610988	3.95484	7.65861e-05	0.00104147
ENSMUSG00000004105	Angptl2	323.939	-0.863669	0.218416	-3.95423	7.67802e-05	0.00104326
ENSMUSG00000020423	Btg2	667.141	0.685217	0.173469	3.9501	7.81201e-05	0.00105974
ENSMUSG00000033721	Vav3	697.017	-0.620351	0.157044	-3.95017	7.80973e-05	0.00105974
ENSMUSG00000048440	Cyp4f16	219.443	2.40546	0.609271	3.9481	7.8774e-05	0.00106774
ENSMUSG00000087396	4933407K13Rik	49.4298	-1.70022	0.430808	-3.94658	7.92741e-05	0.00107365
ENSMUSG00000025577	Cbx2	340.739	-0.783017	0.19847	-3.94527	7.97101e-05	0.00107867
ENSMUSG00000027340	Slc23a2	153.565	0.958618	0.243064	3.9439	8.01673e-05	0.00108398
ENSMUSG00000056476	Med12l	365.385	-0.705151	0.178931	-3.9409	8.11765e-05	0.00109674
ENSMUSG00000032000	Birc3	365.574	1.04607	0.265489	3.94016	8.14287e-05	0.00109925
ENSMUSG00000046314	Stxbp6	569.143	0.590486	0.149996	3.93668	8.26183e-05	0.00111441
ENSMUSG00000103427	Gm37534	334.01	-0.963807	0.244969	-3.93441	8.34011e-05	0.00112406
ENSMUSG00000028868	Wasf2	2148.88	-0.406672	0.103458	-3.93078	8.46722e-05	0.00114027
ENSMUSG00000029007	Agtrap	528.154	-0.599402	0.152594	-3.92809	8.56244e-05	0.00115216
ENSMUSG00000030214	Plbd1	14.6362	3.85422	0.981497	3.92688	8.60538e-05	0.00115701
ENSMUSG00000025612	Bach1	293.199	-0.757847	0.193009	-3.92648	8.61983e-05	0.00115802
ENSMUSG00000085342	Gm12254	284.103	-4.36447	1.11175	-3.92577	8.64524e-05	0.00116049
ENSMUSG00000038543	BC028528	109.415	-1.30963	0.33381	-3.92326	8.7358e-05	0.00117171
ENSMUSG00000024989	Cep55	368.688	0.68053	0.173486	3.92269	8.75664e-05	0.00117356
ENSMUSG00000000386	Mx1	38.331	2.43906	0.621821	3.92246	8.7651e-05	0.00117375
ENSMUSG00000032727	Mier3	1064.5	-0.675908	0.172411	-3.92033	8.84278e-05	0.0011832
ENSMUSG00000026946	Nmi	557.133	0.599022	0.152974	3.91585	9.00853e-05	0.00120441
ENSMUSG00000074419	Gm15448	8.63635	6.63352	1.69448	3.91478	9.04855e-05	0.00120879
ENSMUSG00000047661	1600012P17Rik	7.43531	6.41813	1.6398	3.91397	9.07927e-05	0.00121193
ENSMUSG00000023915	Tnfrsf21	289.102	-0.810229	0.207117	-3.91195	9.15552e-05	0.00122113
ENSMUSG00000072769	Gm10419	41.5443	-2.22453	0.568863	-3.91049	9.211e-05	0.00122754
ENSMUSG00000052026	Slc6a7	7.12032	6.35544	1.62668	3.90699	9.34542e-05	0.00124446
ENSMUSG00000025278	Flnb	2365.15	0.405305	0.103752	3.9065	9.36441e-05	0.001246
ENSMUSG00000028961	Pgd	836.746	0.50039	0.128211	3.90287	9.50576e-05	0.00126355
ENSMUSG00000094302	Olfr644	7.16355	-6.23043	1.59643	-3.90273	9.5115e-05	0.00126355
ENSMUSG00000031075	Ano1	7.02569	6.33211	1.62351	3.90026	9.60909e-05	0.00127449
ENSMUSG00000032014	Oaf	265.241	-0.858552	0.220126	-3.90027	9.60839e-05	0.00127449
ENSMUSG00000045639	Zfp629	179.63	-0.979189	0.251111	-3.89942	9.64215e-05	0.00127785
ENSMUSG00000033016	Nfatc1	921.446	0.53405	0.137196	3.8926	9.91762e-05	0.00131332
ENSMUSG00000030619	Eed	761.995	0.560368	0.143996	3.89155	9.96045e-05	0.00131794
ENSMUSG00000056367	Actr3b	296.412	0.742208	0.190827	3.88942	0.000100483	0.00132852
ENSMUSG00000042506	Usp22	1387.18	-0.519737	0.133641	-3.88906	0.000100632	0.00132943
ENSMUSG00000048163	Selplg	1562.96	0.550215	0.141538	3.88741	0.000101321	0.00133746
ENSMUSG00000051437	Ubqlnl	24.092	-3.15796	0.812863	-3.88498	0.000102338	0.00134982
ENSMUSG00000037405	Icam1	344.216	0.91044	0.234418	3.88384	0.000102822	0.00135513
ENSMUSG00000021069	Pygl	81.7601	1.33071	0.342664	3.88342	0.000102996	0.0013558
ENSMUSG00000048497	Mmgt2	479.942	-0.62168	0.160089	-3.88333	0.000103035	0.0013558
ENSMUSG00000029093	Sorcs2	7.20094	-6.24165	1.60859	-3.88019	0.000104373	0.00137125
ENSMUSG00000106933	RP23-454A14.10	15.5416	4.49138	1.15747	3.88035	0.000104305	0.00137125
ENSMUSG00000031633	Slc25a4	2899.91	0.514535	0.132698	3.87747	0.000105546	0.00138556
ENSMUSG00000048621	Gm6377	12.7867	4.39628	1.13398	3.87686	0.000105811	0.00138795
ENSMUSG00000041135	Ripk2	88.0239	1.41355	0.364798	3.87489	0.000106675	0.00139818
ENSMUSG00000008859	Rala	1243.56	0.690764	0.178373	3.87257	0.000107692	0.00140995
ENSMUSG00000031112	Stk26	653.066	-0.705317	0.182137	-3.87246	0.000107742	0.00140995
ENSMUSG00000001761	Smo	728.399	-0.780596	0.20166	-3.87086	0.000108454	0.00141815
ENSMUSG00000020267	Hint1	5512.72	0.389688	0.100714	3.86927	0.000109161	0.00142628
ENSMUSG00000048154	Kmt2d	1088.1	-0.469523	0.121396	-3.86771	0.000109864	0.00143434
ENSMUSG00000021910	Nisch	1451.88	-0.426296	0.110293	-3.86513	0.000111028	0.00144841
ENSMUSG00000030824	Nucb1	582.187	-0.579153	0.149966	-3.8619	0.000112507	0.00146654
ENSMUSG00000053977	Cd8a	12.6353	5.25482	1.36075	3.8617	0.0001126	0.00146662
ENSMUSG00000026988	Wdsub1	197.351	-0.898457	0.232728	-3.86055	0.000113131	0.00147238
ENSMUSG00000038034	Igsf8	153.631	1.06518	0.276029	3.85893	0.000113886	0.00148106
ENSMUSG00000040093	Bmf	129.781	1.12018	0.29038	3.85762	0.000114498	0.00148785
ENSMUSG00000003992	Ssbp2	645.725	-0.615847	0.159724	-3.8557	0.000115398	0.00149837
ENSMUSG00000040899	Ccr6	65.5978	4.92795	1.27865	3.85401	0.000116197	0.00150757
ENSMUSG00000039115	Itga9	158.086	-1.16777	0.303072	-3.85312	0.000116621	0.0015119
ENSMUSG00000026594	Ralgps2	1373.97	-0.593976	0.154173	-3.85266	0.00011684	0.00151357
ENSMUSG00000018042	Cyb5r3	439.594	0.880441	0.228553	3.85224	0.000117041	0.00151426
ENSMUSG00000029060	Mib2	203.363	-0.885442	0.229855	-3.85217	0.000117075	0.00151426
ENSMUSG00000040247	Tbc1d10c	1534.7	-0.423449	0.109974	-3.85045	0.000117902	0.00152377
ENSMUSG00000024589	Nedd4l	601.977	0.576169	0.149655	3.84997	0.000118132	0.00152555
ENSMUSG00000026700	Tnfsf4	42.9314	2.3257	0.604145	3.84958	0.000118321	0.00152682
ENSMUSG00000083332	Gm7599	31.3027	-2.52864	0.657297	-3.84702	0.000119562	0.00154164
ENSMUSG00000021514	Zfp369	538.052	-0.605675	0.15746	-3.84653	0.000119805	0.00154358
ENSMUSG00000028522	Mier1	3980.36	-0.386283	0.100454	-3.84536	0.000120374	0.00154971
ENSMUSG00000027550	Lrrcc1	998.15	-0.494391	0.128638	-3.84328	0.000121403	0.00156176
ENSMUSG00000047146	Tet1	46.615	-1.94648	0.507142	-3.83814	0.000123969	0.00159291
ENSMUSG00000105149	RP24-230J14.9	14.1208	-3.92517	1.0227	-3.83805	0.000124016	0.00159291
ENSMUSG00000027762	Sucnr1	7.95259	6.5164	1.69909	3.83523	0.000125444	0.00161001
ENSMUSG00000100954	Gm10138	131.015	1.07753	0.281003	3.8346	0.000125766	0.0016129
ENSMUSG00000044066	Cep68	373.326	-0.923882	0.241349	-3.82799	0.000129193	0.00165558
ENSMUSG00000005779	Psmb4	2652.18	0.387603	0.101265	3.82759	0.000129404	0.001657
ENSMUSG00000002257	Def6	1644.76	-0.448082	0.117231	-3.82223	0.000132252	0.00169217
ENSMUSG00000004317	Clcn5	440.828	0.731939	0.19154	3.82133	0.000132731	0.00169701
ENSMUSG00000045991	Onecut2	361.782	7.31303	1.91583	3.81717	0.000134993	0.00172461
ENSMUSG00000053580	Tanc2	186.508	-1.05755	0.277249	-3.81446	0.000136483	0.00174231
ENSMUSG00000051439	Cd14	7.81837	6.49154	1.70294	3.81196	0.000137871	0.00175867
ENSMUSG00000074221	Zfp568	141.302	0.991139	0.260022	3.81174	0.00013799	0.00175884
ENSMUSG00000022849	Hspbap1	13.3169	3.9233	1.02934	3.81148	0.000138137	0.00175938
ENSMUSG00000051339	2900026A02Rik	309.233	0.725276	0.190408	3.80906	0.000139493	0.00177529
ENSMUSG00000045917	6330416G13Rik	196.257	0.940335	0.246888	3.80875	0.00013967	0.00177618
ENSMUSG00000022708	Zbtb20	2234.26	-0.383322	0.100682	-3.80727	0.000140509	0.00178549
ENSMUSG00000043832	Clec4a3	6.61771	6.24974	1.64207	3.80601	0.000141229	0.00179328
ENSMUSG00000024387	Csnk2b	1267.42	0.556613	0.146261	3.80562	0.000141447	0.00179468
ENSMUSG00000029359	Tesc	35.036	2.76495	0.726816	3.80419	0.000142269	0.0018021
ENSMUSG00000030114	Klrg1	11.5829	5.1193	1.34575	3.80404	0.000142356	0.0018021
ENSMUSG00000030147	Clec4b1	10.0966	5.87294	1.54373	3.80439	0.000142156	0.0018021
ENSMUSG00000097418	Gm26667	106.236	1.55386	0.40854	3.80344	0.000142698	0.00180505
ENSMUSG00000041313	Slc7a1	999.867	0.4486	0.117967	3.80275	0.000143098	0.00180874
ENSMUSG00000019935	Slc17a8	16.6153	3.38009	0.889292	3.80087	0.000144186	0.00182112
ENSMUSG00000021360	Gcnt2	101.784	3.25605	0.856893	3.79984	0.00014479	0.00182735
ENSMUSG00000006715	Gmnn	527.268	0.581216	0.153002	3.79874	0.000145432	0.00183408
ENSMUSG00000064369	mt-Te	780.504	-0.508073	0.133779	-3.79786	0.000145948	0.00183919
ENSMUSG00000027858	Tspan2	1623.74	-0.603676	0.159046	-3.79562	0.000147277	0.00185453
ENSMUSG00000086795	Gm11579	18.1339	-3.13339	0.825785	-3.79443	0.000147981	0.00186199
ENSMUSG00000026914	Psmd14	2156.91	0.385866	0.101711	3.79375	0.000148389	0.00186571
ENSMUSG00000024014	Pim1	6976.13	-0.453149	0.119467	-3.7931	0.000148777	0.00186918
ENSMUSG00000000552	Zfp385a	313.853	-0.748358	0.197324	-3.79253	0.000149123	0.00187087
ENSMUSG00000043008	Klhl6	1117.92	-0.586245	0.15458	-3.7925	0.000149136	0.00187087
ENSMUSG00000035835	Lppr3	81.1296	-1.8324	0.483223	-3.79203	0.000149421	0.00187304
ENSMUSG00000049225	Pdp1	122.321	1.06308	0.280381	3.79156	0.000149703	0.00187516
ENSMUSG00000006344	Ggt5	196.767	-0.922195	0.243262	-3.79096	0.000150068	0.00187833
ENSMUSG00000000303	Cdh1	356.204	2.0642	0.544583	3.79042	0.000150391	0.00188095
ENSMUSG00000027187	Cat	1064.36	-0.455205	0.120171	-3.78799	0.000151869	0.00189802
ENSMUSG00000021957	Tkt	1924.15	-0.407484	0.107734	-3.78231	0.000155382	0.00194047
ENSMUSG00000033177	Tmprss7	244.182	-1.04861	0.277411	-3.77999	0.000156833	0.00195713
ENSMUSG00000019850	Tnfaip3	136.323	1.09054	0.288743	3.77687	0.000158814	0.00198036
ENSMUSG00000034574	Daam1	140.967	1.02149	0.270523	3.77599	0.000159376	0.00198589
ENSMUSG00000058728	Cd300c	36.5762	2.36439	0.626227	3.77561	0.000159619	0.00198594
ENSMUSG00000070348	Ccnd1	258.113	2.36381	0.626067	3.77565	0.000159589	0.00198594
ENSMUSG00000003123	Lipe	166.345	1.06915	0.283211	3.77508	0.000159953	0.00198862
ENSMUSG00000024772	Ehd1	514.04	0.943566	0.250046	3.77358	0.000160923	0.00199822
ENSMUSG00000102941	Gm37552	65.2043	1.60406	0.425084	3.77351	0.000160965	0.00199822
ENSMUSG00000074813	Gm14005	27.605	2.44674	0.648905	3.77058	0.000162872	0.00202038
ENSMUSG00000036661	Dennd3	357.682	0.648662	0.17205	3.7702	0.000163119	0.00202194
ENSMUSG00000028837	Psmb2	983.871	0.583013	0.154739	3.76771	0.000164752	0.00204068
ENSMUSG00000026103	Gls	1952.17	-0.396603	0.105276	-3.76727	0.00016504	0.00204175
ENSMUSG00000037601	Nme1	1838.11	0.421843	0.111978	3.76721	0.000165084	0.00204175
ENSMUSG00000016319	Slc25a5	3285.36	0.415422	0.11036	3.76425	0.000167048	0.00206451
ENSMUSG00000000326	Comt	370.313	0.713355	0.189565	3.76311	0.00016781	0.00207239
ENSMUSG00000051950	B3glct	148.131	-1.11646	0.296775	-3.76196	0.000168587	0.00208045
ENSMUSG00000103715	4933431K14Rik	32.876	-2.03365	0.540657	-3.76144	0.00016894	0.00208326
ENSMUSG00000032216	Nedd4	6234.52	0.363284	0.0966605	3.75835	0.000171039	0.00210758
ENSMUSG00000071516	Hist1h2ai	45.8585	1.88786	0.502345	3.75811	0.000171205	0.00210807
ENSMUSG00000008845	Cd163	39.027	-2.1284	0.566448	-3.75746	0.000171648	0.00211197
ENSMUSG00000032745	Gpbp1	2409.48	-0.402496	0.107169	-3.75572	0.000172843	0.0021251
ENSMUSG00000041444	Arhgap32	422.507	-0.970382	0.258388	-3.75553	0.000172976	0.00212517
ENSMUSG00000032666	1700025G04Rik	766.127	-0.603662	0.160797	-3.75418	0.000173908	0.00213505
ENSMUSG00000043067	Dpy19l1	592.271	0.543333	0.144744	3.75376	0.000174202	0.00213709
ENSMUSG00000050621	Rps27rt	510.22	-0.588158	0.156742	-3.75239	0.000175154	0.00214719
ENSMUSG00000030314	Atg7	354.056	0.912728	0.243582	3.74711	0.000178882	0.00219127
ENSMUSG00000036986	Pml	603.388	-0.698237	0.186466	-3.74459	0.00018069	0.00221179
ENSMUSG00000066877	Nck2	1011.46	-0.57696	0.154098	-3.74411	0.000181033	0.00221437
ENSMUSG00000020330	Hmmr	818.502	0.535622	0.143098	3.74306	0.000181796	0.00222207
ENSMUSG00000021356	Irf4	56.2096	4.94733	1.32275	3.74019	0.000183884	0.00224594
ENSMUSG00000043811	Rtn4r	17.0745	-3.11309	0.832723	-3.73844	0.000185167	0.00225995
ENSMUSG00000029484	Anxa3	15.5393	3.62487	0.969801	3.73775	0.000185677	0.00226453
ENSMUSG00000103317	Gm38359	119.468	-1.09719	0.293684	-3.73596	0.000187002	0.00227902
ENSMUSG00000019876	Pkib	96.2559	3.96663	1.06257	3.73307	0.000189162	0.00230366
ENSMUSG00000038855	Itpkb	463.761	-0.597371	0.16017	-3.72961	0.000191779	0.00233382
ENSMUSG00000020787	P2rx1	67.634	1.60887	0.431488	3.72865	0.000192508	0.00234099
ENSMUSG00000030474	Siglece	22.7144	2.70487	0.72591	3.72618	0.0001944	0.00236227
ENSMUSG00000048118	Arid4a	3703.33	-0.365933	0.0982193	-3.72568	0.000194792	0.00236531
ENSMUSG00000020900	Myh10	141.415	-1.08235	0.29066	-3.72375	0.000196284	0.00238169
ENSMUSG00000044167	Foxo1	519.783	0.800799	0.215137	3.72228	0.000197434	0.0023939
ENSMUSG00000025034	Trim8	657.717	-0.555177	0.149226	-3.72037	0.000198929	0.00241027
ENSMUSG00000038599	Capn8	6.42783	6.20807	1.66947	3.71858	0.000200349	0.00242572
ENSMUSG00000022964	Tmem50b	246.382	0.878687	0.236401	3.71694	0.00020165	0.0024387
ENSMUSG00000034042	Gpbp1l1	772.889	-0.475197	0.127849	-3.71686	0.000201714	0.0024387
ENSMUSG00000031278	Acsl4	1196.7	0.441799	0.118895	3.71588	0.0002025	0.00244643
ENSMUSG00000024347	Psd2	10.2041	4.99899	1.34564	3.71495	0.00020324	0.0024536
ENSMUSG00000021983	Atp8a2	47.3135	-1.71159	0.460979	-3.71295	0.000204856	0.00247132
ENSMUSG00000049744	Arhgap15	1354.99	-0.441152	0.118885	-3.71074	0.000206658	0.00249126
ENSMUSG00000029771	Irf5	432.137	1.71392	0.462052	3.70937	0.000207779	0.00250296
ENSMUSG00000025862	Stag2	1800.88	-0.382973	0.103267	-3.70856	0.000208444	0.00250735
ENSMUSG00000038319	Kcnh2	25.3258	-2.66536	0.718691	-3.70863	0.000208382	0.00250735
ENSMUSG00000028885	Smpdl3b	43.6689	5.70309	1.53818	3.70768	0.000209164	0.00251412
ENSMUSG00000079603	Gm13218	18.1361	2.83099	0.763582	3.70751	0.000209309	0.00251412
ENSMUSG00000038486	Sv2a	146.798	-0.942958	0.254425	-3.70623	0.000210364	0.00252498
ENSMUSG00000027751	Supt20	921.755	-0.467177	0.126064	-3.70588	0.00021066	0.0025267
ENSMUSG00000023004	Tuba1b	3926.36	0.355754	0.0960353	3.7044	0.000211888	0.00253935
ENSMUSG00000024235	Map3k8	256.129	0.844919	0.228095	3.70425	0.000212019	0.00253935
ENSMUSG00000031155	Pim2	304.947	0.78819	0.212845	3.70311	0.000212971	0.00254893
ENSMUSG00000003161	Sri	2740.69	0.520717	0.140645	3.70236	0.000213606	0.00255469
ENSMUSG00000001918	Slc1a5	1068.64	0.466152	0.125934	3.70155	0.000214284	0.00256097
ENSMUSG00000037318	Traf3ip3	964.183	-0.457773	0.123725	-3.69992	0.000215664	0.00257561
ENSMUSG00000063354	Slc39a4	177.45	1.16515	0.314944	3.69953	0.000215996	0.00257773
ENSMUSG00000076752	Tcrg-C2	7992.02	-0.480507	0.129955	-3.6975	0.000217737	0.00259664
ENSMUSG00000033174	Mgll	10.8085	5.01239	1.35571	3.69724	0.000217959	0.00259744
ENSMUSG00000069266	Hist1h4b	76.7264	1.49475	0.404406	3.69616	0.000218881	0.00260656
ENSMUSG00000044629	Cnrip1	6.56639	-6.09983	1.65092	-3.69481	0.000220054	0.00261866
ENSMUSG00000038151	Prdm1	26.3877	3.20052	0.866734	3.69262	0.000221956	0.00263941
ENSMUSG00000028691	Prdx1	2909.4	0.417058	0.112988	3.69119	0.00022321	0.00265243
ENSMUSG00000037816	Fbxw17	127.181	1.07177	0.290452	3.69002	0.000224236	0.00266272
ENSMUSG00000027698	Nceh1	280.828	0.744411	0.201774	3.68934	0.000224836	0.00266737
ENSMUSG00000062070	Pgk1	2872.78	0.436035	0.118192	3.68921	0.000224947	0.00266737
ENSMUSG00000029204	Rhoh	1304.53	-0.463369	0.125608	-3.689	0.000225138	0.00266773
ENSMUSG00000032218	Ccnb2	919.384	0.531829	0.144315	3.68519	0.000228535	0.00270607
ENSMUSG00000038751	Ptk6	11.9818	4.54393	1.23326	3.68447	0.000229179	0.00271176
ENSMUSG00000041046	Ramp3	55.6973	1.98511	0.539216	3.68148	0.000231882	0.0027418
ENSMUSG00000066755	Tnfsf18	6.72815	6.27188	1.70381	3.68108	0.000232249	0.00274419
ENSMUSG00000035181	Heatr5a	323.582	-0.849193	0.23087	-3.67822	0.000234863	0.00277312
ENSMUSG00000020125	Elane	18.6076	-2.83844	0.77186	-3.6774	0.000235623	0.00278012
ENSMUSG00000037447	Arid5a	670.139	-0.513233	0.139681	-3.67432	0.000238481	0.00281185
ENSMUSG00000022824	Muc13	2387.91	-1.1343	0.308817	-3.67305	0.000239675	0.00282393
ENSMUSG00000015214	Mtmr1	242.209	0.797988	0.217352	3.6714	0.000241223	0.00284016
ENSMUSG00000063065	Mapk3	658.13	0.644066	0.175567	3.6685	0.00024398	0.0028706
ENSMUSG00000038612	Mcl1	2528.58	0.492466	0.134357	3.66536	0.000246988	0.00290394
ENSMUSG00000018548	Trim37	890.703	-0.562738	0.153648	-3.6625	0.000249764	0.00293451
ENSMUSG00000003545	Fosb	21.3208	2.64437	0.722081	3.66214	0.000250113	0.00293581
ENSMUSG00000039264	Gimap3	6.10271	6.12975	1.67387	3.66203	0.000250227	0.00293581
ENSMUSG00000025747	Tyms	903.436	0.460323	0.125711	3.66177	0.00025048	0.00293671
ENSMUSG00000030759	Far1	889.7	0.506582	0.138441	3.6592	0.000253	0.00296418
ENSMUSG00000090841	Myl6	1235.09	0.611341	0.167173	3.65694	0.000255239	0.00298621
ENSMUSG00000102600	Gm37266	55.432	-1.6595	0.453782	-3.65705	0.000255138	0.00298621
ENSMUSG00000039699	Batf2	6.7661	6.28183	1.71812	3.65623	0.000255952	0.00299245
ENSMUSG00000074796	Slc4a11	10.2237	5.89856	1.61342	3.65593	0.000256249	0.00299382
ENSMUSG00000027522	Stx16	1713.49	-0.407665	0.111536	-3.65502	0.000257158	0.00300234
ENSMUSG00000075596	B130006D01Rik	217.736	-0.808721	0.221282	-3.65471	0.000257473	0.00300391
ENSMUSG00000044694	2010007H06Rik	10.1472	5.05124	1.38222	3.65443	0.000257753	0.00300508
ENSMUSG00000098322	5830468F06Rik	224.755	-0.791152	0.216569	-3.65312	0.000259073	0.00301835
ENSMUSG00000041471	Fam35a	134.734	-0.980241	0.268411	-3.65201	0.000260197	0.00302933
ENSMUSG00000081051	Gm15427	6881.78	-0.359199	0.0983783	-3.6512	0.000261016	0.00303674
ENSMUSG00000008475	Arpc5	2964.33	0.482794	0.132239	3.65091	0.000261317	0.00303813
ENSMUSG00000048215	A630023P12Rik	8.74454	-5.52319	1.51354	-3.6492	0.000263061	0.00305627
ENSMUSG00000078763	Slfn1	6.7131	6.26887	1.71836	3.64817	0.000264118	0.00306642
ENSMUSG00000052013	Btla	66.14	3.84199	1.0536	3.64655	0.000265788	0.00308366
ENSMUSG00000085354	Gm2044	22.3449	3.53483	0.969471	3.64615	0.000266203	0.00308633
ENSMUSG00000040929	Rfx3	165.145	-1.1084	0.304184	-3.64386	0.000268584	0.00311176
ENSMUSG00000057841	Rpl32	22736.2	-0.300999	0.0826122	-3.64352	0.000268932	0.00311364
ENSMUSG00000027861	Casq2	15.51	3.24527	0.891001	3.64228	0.000270235	0.00312439
ENSMUSG00000097471	5830432E09Rik	180.988	-0.901525	0.247505	-3.64245	0.000270058	0.00312439
ENSMUSG00000036398	Ppp1r11	561.206	0.666156	0.18295	3.64119	0.000271381	0.00313546
ENSMUSG00000001472	Tcf25	5119.14	-0.389307	0.106959	-3.63977	0.000272885	0.0031445
ENSMUSG00000014543	Klra17	23.5	2.47803	0.680775	3.64001	0.00027263	0.0031445
ENSMUSG00000041959	S100a10	3777.51	0.555034	0.152491	3.63978	0.000272866	0.0031445
ENSMUSG00000063439	B9d2	520.386	-0.586504	0.161139	-3.63974	0.000272918	0.0031445
ENSMUSG00000001020	S100a4	5749.09	1.37028	0.376812	3.63652	0.000276348	0.00318182
ENSMUSG00000027459	Fam110a	273.522	-0.751528	0.206693	-3.63596	0.00027695	0.00318655
ENSMUSG00000000394	Gcg	19.1965	3.37235	0.927974	3.6341	0.00027895	0.00320292
ENSMUSG00000027865	Gdap2	215.609	0.847704	0.233253	3.63427	0.000278766	0.00320292
ENSMUSG00000032577	Mapkapk3	299.382	0.746612	0.205435	3.63429	0.000278749	0.00320292
ENSMUSG00000037266	Rsrp1	8987.84	-0.3214	0.0884622	-3.63319	0.000279935	0.00321203
ENSMUSG00000009876	Cox4i2	19.6523	-2.62536	0.722798	-3.63222	0.00028099	0.00322192
ENSMUSG00000007480	Mc5r	11.9441	-4.0092	1.1039	-3.63186	0.000281381	0.00322418
ENSMUSG00000055116	Arntl	141.266	0.996049	0.274284	3.63145	0.000281835	0.00322717
ENSMUSG00000023032	Slc4a8	14.9156	3.36889	0.927834	3.63091	0.000282421	0.00323165
ENSMUSG00000057531	Dtnbp1	1301.23	-0.645353	0.17788	-3.62803	0.000285589	0.00326567
ENSMUSG00000018585	Atox1	635.024	0.804746	0.221886	3.62685	0.000286898	0.00327838
ENSMUSG00000016664	Pacsin2	114.328	1.20436	0.332175	3.62567	0.000288214	0.00328892
ENSMUSG00000032436	Cmtm7	739.597	-0.57792	0.159393	-3.62574	0.000288131	0.00328892
ENSMUSG00000002111	Spi1	762.72	0.761228	0.210023	3.6245	0.00028952	0.00330156
ENSMUSG00000032812	Arap1	631.738	-0.606297	0.167343	-3.62308	0.000291113	0.00331746
ENSMUSG00000026944	Abca2	831.523	-0.498127	0.137494	-3.6229	0.000291316	0.0033175
ENSMUSG00000021701	Plk2	18.9261	2.98943	0.825344	3.62205	0.000292281	0.00332622
ENSMUSG00000000486	2001-09-01	645.834	-0.563761	0.155697	-3.6209	0.000293584	0.00333876
ENSMUSG00000023827	Agpat4	91.6117	1.19425	0.329847	3.62062	0.000293894	0.00334002
ENSMUSG00000038390	Gpr162	12.3092	4.58187	1.26588	3.6195	0.000295171	0.00335224
ENSMUSG00000018293	Pfn1	2654.81	0.452251	0.125049	3.6166	0.000298498	0.003386
ENSMUSG00000060519	Tor3a	120.826	1.32024	0.365055	3.61656	0.00029855	0.003386
ENSMUSG00000019998	Stx7	602.774	0.584951	0.161766	3.61604	0.000299148	0.00339048
ENSMUSG00000051790	Nlgn2	50.5867	-1.91656	0.530213	-3.61469	0.000300705	0.00340582
ENSMUSG00000003037	Rab8a	2074.78	0.479796	0.13281	3.61264	0.000303091	0.00342818
ENSMUSG00000008348	Ubc	3628.33	0.411319	0.113854	3.6127	0.000303027	0.00342818
ENSMUSG00000024393	Prrc2a	755.221	-0.508038	0.140637	-3.6124	0.000303371	0.00342902
ENSMUSG00000026315	Serpinb8	5.95799	6.09455	1.68722	3.61219	0.000303623	0.00342954
ENSMUSG00000030615	Tmem126a	263.781	0.698735	0.193466	3.61167	0.000304233	0.00343411
ENSMUSG00000029312	Klhl8	12.2621	5.27577	1.46112	3.61076	0.000305301	0.00344383
ENSMUSG00000036769	Wdr44	124.041	1.07879	0.298788	3.61056	0.000305532	0.00344411
ENSMUSG00000029545	Acads	539.247	-0.572056	0.158462	-3.61005	0.000306137	0.00344859
ENSMUSG00000040957	Cables1	124.178	1.46711	0.406811	3.60638	0.000310501	0.00349344
ENSMUSG00000054203	Ifi205	13.3655	3.33371	0.924402	3.60635	0.000310538	0.00349344
ENSMUSG00000025404	R3hdm2	873.746	-0.473002	0.131174	-3.60591	0.000311063	0.003497
ENSMUSG00000034858	Fam214a	124.071	-0.975164	0.270558	-3.60427	0.000313036	0.0035168
ENSMUSG00000051703	Tmem198	10.2984	4.94207	1.37162	3.60308	0.000314464	0.00353046
ENSMUSG00000050410	Tcf19	345.375	0.792661	0.22001	3.60284	0.000314761	0.00353142
ENSMUSG00000026321	Tnfrsf11a	38.5618	2.08496	0.578952	3.60127	0.000316666	0.00355041
ENSMUSG00000031508	Ankrd10	1460.83	-0.460358	0.127841	-3.60101	0.000316979	0.00355043
ENSMUSG00000033453	Adamts15	6.08045	6.12805	1.7018	3.60092	0.000317094	0.00355043
ENSMUSG00000021877	Arf4	1515.85	0.408907	0.113567	3.60059	0.000317495	0.00355254
ENSMUSG00000048807	Slc35e4	8.45697	-5.48003	1.52225	-3.59995	0.000318273	0.00355886
ENSMUSG00000040865	Ino80d	1180.21	0.422024	0.117261	3.59902	0.000319417	0.00356925
ENSMUSG00000015575	Atp6v0e	1730.75	0.536281	0.149039	3.59826	0.000320357	0.00357736
ENSMUSG00000037731	Themis2	41.4055	1.97417	0.548732	3.59769	0.000321051	0.0035827
ENSMUSG00000058297	Spock2	6.07555	-5.9953	1.66659	-3.59734	0.000321494	0.00358525
ENSMUSG00000004296	Il12b	28.7444	8.36685	2.32617	3.59684	0.000322112	0.00358758
ENSMUSG00000028100	Nudt17	15.0217	3.45253	0.959886	3.59682	0.000322133	0.00358758
ENSMUSG00000022584	Ly6c2	105.018	1.19001	0.330871	3.59659	0.000322413	0.0035883
ENSMUSG00000023972	Ptk7	336.429	-0.906793	0.252381	-3.59296	0.000326944	0.0036363
ENSMUSG00000024798	Htr7	22.9032	8.03928	2.23773	3.5926	0.000327394	0.00363645
ENSMUSG00000027692	Tnik	474.103	0.590122	0.16426	3.59261	0.000327381	0.00363645
ENSMUSG00000079227	Ccr5	25.2034	3.0231	0.841601	3.59208	0.000328048	0.00364129
ENSMUSG00000048490	Nrip1	2388.77	-0.415182	0.115635	-3.59047	0.000330083	0.00366143
ENSMUSG00000023495	Pcbp4	29.527	2.42961	0.676975	3.58892	0.000332049	0.00368079
ENSMUSG00000103432	6720464F23Rik	128.828	1.03302	0.288131	3.58523	0.00033678	0.00373076
ENSMUSG00000005370	Msh6	1175.87	-0.506598	0.14132	-3.58476	0.00033739	0.00373378
ENSMUSG00000024533	Spire1	89.491	1.40526	0.392018	3.58467	0.000337501	0.00373378
ENSMUSG00000004207	Psap	1507.34	0.668052	0.186428	3.58343	0.000339111	0.00374911
ENSMUSG00000009828	Ick	324.769	-0.756334	0.211131	-3.58229	0.000340593	0.003763
ENSMUSG00000097857	Gm26603	21.9159	2.52519	0.705021	3.58172	0.000341335	0.00376869
ENSMUSG00000064254	Ethe1	484.85	-0.595301	0.166223	-3.58135	0.000341822	0.00377158
ENSMUSG00000026027	Stradb	140.517	-0.998783	0.278973	-3.58021	0.000343315	0.00378555
ENSMUSG00000028649	Macf1	2295.83	-0.410086	0.114548	-3.58003	0.000343559	0.00378574
ENSMUSG00000023791	Pigx	643.743	-0.552488	0.154374	-3.57889	0.000345063	0.00379979
ENSMUSG00000072893	4933439C10Rik	221.377	-0.768504	0.214764	-3.57836	0.000345759	0.00380494
ENSMUSG00000039195	1110008P14Rik	94.2162	1.27204	0.355613	3.57705	0.000347497	0.00382156
ENSMUSG00000099858	Gm6652	15.0623	-3.27772	0.916442	-3.57657	0.00034813	0.00382598
ENSMUSG00000028932	Psmc2	1424.91	0.433489	0.121208	3.5764	0.000348364	0.00382603
ENSMUSG00000055322	Tns1	255.464	-0.883844	0.247187	-3.5756	0.000349421	0.00383512
ENSMUSG00000021214	Akr1c18	8.26701	5.57891	1.56185	3.572	0.000354267	0.00388575
ENSMUSG00000024053	Emilin2	1826.2	-0.641295	0.179557	-3.57155	0.000354881	0.00388993
ENSMUSG00000039774	Galnt12	255.74	0.836962	0.234365	3.57119	0.000355365	0.00389267
ENSMUSG00000047045	Tmem164	1035.44	-0.428555	0.120046	-3.56991	0.000357106	0.00390917
ENSMUSG00000003228	Grk5	16.5155	3.34189	0.93648	3.56856	0.000358947	0.00392674
ENSMUSG00000085148	Mir22hg	73.4521	1.60057	0.448859	3.56586	0.000362664	0.00396481
ENSMUSG00000034833	Tespa1	828.457	-0.545502	0.153118	-3.56262	0.000367174	0.00401149
ENSMUSG00000024952	Rps6ka4	94.5238	1.38207	0.388162	3.56055	0.000370083	0.00404062
ENSMUSG00000003032	Klf4	144.133	0.955692	0.268432	3.56027	0.00037047	0.0040422
ENSMUSG00000027381	Bcl2l11	1633.75	0.576967	0.162104	3.55924	0.000371926	0.00405543
ENSMUSG00000053841	Txlna	839.065	-0.453256	0.127406	-3.55756	0.000374315	0.00407881
ENSMUSG00000052353	Cemip	34.177	1.84522	0.518853	3.55634	0.00037606	0.00409515
ENSMUSG00000021868	Ppif	644.151	-0.599188	0.168518	-3.55563	0.000377076	0.00410353
ENSMUSG00000022885	St6gal1	436.428	-0.699239	0.196737	-3.55418	0.000379153	0.00412344
ENSMUSG00000035530	Eif1	3745.6	0.352187	0.0990972	3.55396	0.000379483	0.00412434
ENSMUSG00000020919	Stat5b	1763.1	-0.43652	0.122871	-3.55268	0.000381334	0.00414028
ENSMUSG00000062585	Cnr2	50.7597	1.62445	0.457256	3.5526	0.000381446	0.00414028
ENSMUSG00000005609	Ctr9	1097.34	-0.442232	0.124608	-3.549	0.000386695	0.0041918
ENSMUSG00000045826	Ptprcap	3059.16	-0.393565	0.110891	-3.54912	0.000386517	0.0041918
ENSMUSG00000022686	B3gnt5	316.689	-0.697262	0.196526	-3.54793	0.000388273	0.00420617
ENSMUSG00000037552	Plekhg2	156.749	-0.894409	0.252114	-3.54764	0.000388702	0.00420808
ENSMUSG00000022876	Samsn1	1299.28	0.567088	0.159919	3.54611	0.000390968	0.00422712
ENSMUSG00000027018	Hat1	932.894	0.497034	0.140158	3.54625	0.000390752	0.00422712
ENSMUSG00000071855	Ccdc112	160.977	0.932929	0.263146	3.54529	0.000392181	0.00423749
ENSMUSG00000022449	Adamts20	5.97178	6.10096	1.72132	3.54435	0.000393577	0.00424981
ENSMUSG00000045817	Zfp36l2	593.461	-0.742612	0.209599	-3.54302	0.000395576	0.00426864
ENSMUSG00000095079	Igha	8.2264	5.57214	1.57385	3.54046	0.000399428	0.00430741
ENSMUSG00000052160	Pld4	539.186	0.885303	0.250127	3.53941	0.000401016	0.00432175
ENSMUSG00000002332	Dhrs1	424.436	0.686764	0.194046	3.53918	0.000401366	0.00432273
ENSMUSG00000037926	Ssh2	2128.17	-0.446893	0.126291	-3.53859	0.000402272	0.00432968
ENSMUSG00000025132	Arhgdia	1106.79	0.567285	0.160328	3.53829	0.000402732	0.00433184
ENSMUSG00000039988	Ankrd13c	322.087	0.691415	0.195422	3.53806	0.000403073	0.00433271
ENSMUSG00000025044	Msr1	5.98456	6.10382	1.72591	3.53658	0.000405351	0.00435265
ENSMUSG00000035885	Cox8a	2485.86	0.490532	0.138705	3.53651	0.00040545	0.00435265
ENSMUSG00000097290	1300002E11Rik	152.981	-0.955935	0.270342	-3.53602	0.000406207	0.00435797
ENSMUSG00000050002	Idnk	405.326	0.732072	0.207175	3.5336	0.000409945	0.00439524
ENSMUSG00000005698	Ctcf	3402.6	-0.342793	0.0970989	-3.53034	0.000415021	0.0044468
ENSMUSG00000036912	Piwil4	46.2513	2.47988	0.702694	3.52911	0.000416965	0.00446477
ENSMUSG00000039686	Zer1	397.765	-0.790802	0.224362	-3.52468	0.000423997	0.00453715
ENSMUSG00000020099	Unc5b	5.61516	6.0088	1.70527	3.52367	0.000425613	0.00455152
ENSMUSG00000091512	Lamtor3	410.381	0.594172	0.168708	3.5219	0.00042846	0.00457903
ENSMUSG00000032740	Ccdc88a	4071.49	-0.344757	0.0979476	-3.51981	0.000431857	0.00461131
ENSMUSG00000050241	Klre1	19.0174	7.77107	2.20788	3.5197	0.000432034	0.00461131
ENSMUSG00000024294	Mib1	838.294	-0.473697	0.134654	-3.51789	0.000434985	0.00463984
ENSMUSG00000043932	Klri2	70.3851	6.19982	1.76424	3.51415	0.000441165	0.00470275
ENSMUSG00000018930	Ccl4	182.606	1.24339	0.354446	3.50797	0.000451538	0.00481024
ENSMUSG00000053168	9030619P08Rik	346.156	-2.43211	0.693454	-3.50724	0.000452786	0.00482046
ENSMUSG00000000028	Cdc45	402.194	0.615756	0.175756	3.50346	0.000459248	0.00487991
ENSMUSG00000032377	Plscr4	316.371	-0.733749	0.209418	-3.50375	0.000458755	0.00487991
ENSMUSG00000039982	Dtx4	596.616	-0.657928	0.187793	-3.50348	0.000459217	0.00487991
ENSMUSG00000078619	Smarcd2	1411.59	-0.389896	0.111305	-3.50295	0.000460131	0.00488618
ENSMUSG00000019852	Arfgef3	55.0689	1.54844	0.442098	3.50247	0.000460963	0.00488878
ENSMUSG00000022475	Hdac7	1176.43	-0.528335	0.150846	-3.50248	0.000460951	0.00488878
ENSMUSG00000070000	Fcho1	1006.28	-0.453922	0.129738	-3.49875	0.000467439	0.00495432
ENSMUSG00000039089	L3mbtl3	597.096	-0.501059	0.14322	-3.49854	0.000467817	0.00495517
ENSMUSG00000026832	Cytip	1156.1	1.58556	0.453364	3.49733	0.000469944	0.00497455
ENSMUSG00000021068	Nin	631.831	0.569965	0.162988	3.49698	0.000470552	0.00497782
ENSMUSG00000025468	Caly	6.32928	6.18683	1.76929	3.49679	0.000470886	0.0049782
ENSMUSG00000049313	Sorl1	137.715	1.28781	0.36849	3.49482	0.000474373	0.00501188
ENSMUSG00000026276	2002-09-01	1502.74	0.37298	0.106741	3.49425	0.000475398	0.00501953
ENSMUSG00000021277	Traf3	375.269	0.624882	0.178922	3.49247	0.000478568	0.0050498
ENSMUSG00000081564	Gm13717	84.3174	-1.20896	0.346233	-3.49177	0.000479832	0.00505993
ENSMUSG00000022114	Spry2	20.2596	2.51277	0.719761	3.49111	0.000481018	0.00506924
ENSMUSG00000028914	Casp9	244.081	0.753192	0.215816	3.48997	0.000483075	0.0050877
ENSMUSG00000055675	Kbtbd11	1229.65	-0.626286	0.179466	-3.48972	0.000483522	0.00508919
ENSMUSG00000022471	Xrcc6	907.661	-0.524763	0.150383	-3.4895	0.000483923	0.00509019
ENSMUSG00000054672	5830411N06Rik	237.27	-1.07961	0.309434	-3.48899	0.000484848	0.00509671
ENSMUSG00000079069	8430423G03Rik	7.9875	-5.39383	1.5465	-3.48776	0.00048708	0.00511695
ENSMUSG00000089829	Gm16565	46.0007	-1.55435	0.445774	-3.48686	0.000488722	0.00513097
ENSMUSG00000022663	Atg3	537.523	0.587308	0.168459	3.48635	0.000489667	0.00513766
ENSMUSG00000036223	Ska1	313.339	0.652439	0.187323	3.48296	0.00049591	0.00519988
ENSMUSG00000007458	M6pr	1100.28	0.522595	0.150195	3.47945	0.000502441	0.00526505
ENSMUSG00000100744	Gm17764	5.44818	5.96879	1.71594	3.47843	0.000504358	0.00528182
ENSMUSG00000025888	Casp1	373.265	0.659728	0.18976	3.47664	0.000507732	0.00531382
ENSMUSG00000027510	Rbm38	569.554	-0.569164	0.16373	-3.47623	0.000508514	0.00531866
ENSMUSG00000064372	mt-Tp	1895.76	-0.431586	0.124173	-3.47569	0.00050955	0.00532615
ENSMUSG00000028528	Dnajc6	224.232	-0.758415	0.218253	-3.47494	0.000510977	0.00533772
ENSMUSG00000024841	Eif1ad	841.482	0.452097	0.130116	3.47457	0.000511666	0.00534157
ENSMUSG00000062456	Rpl9-ps6	151.403	-0.938294	0.270088	-3.47403	0.000512712	0.00534914
ENSMUSG00000031860	Pbx4	182.804	-0.988368	0.284658	-3.47212	0.000516369	0.00538393
ENSMUSG00000059900	Tmem40	56.129	-1.5731	0.453171	-3.47131	0.00051793	0.00539683
ENSMUSG00000100392	Gm28935	11.3498	4.23195	1.21927	3.47088	0.000518751	0.00540201
ENSMUSG00000001700	Gramd3	27.8243	2.58482	0.744787	3.47055	0.000519393	0.00540532
ENSMUSG00000028873	Cdca8	1031.9	0.421787	0.121562	3.46973	0.000520983	0.00541849
ENSMUSG00000000915	Hip1r	334.356	0.857011	0.24757	3.46169	0.000536794	0.00557944
ENSMUSG00000021886	Gpr65	876.491	-0.538086	0.155554	-3.45915	0.000541876	0.00562876
ENSMUSG00000020897	Aurkb	425.722	0.607715	0.175708	3.45867	0.000542847	0.00563533
ENSMUSG00000015766	Eps8	6.23339	6.16379	1.7824	3.45813	0.000543933	0.00563958
ENSMUSG00000025085	Ablim1	1279.1	-0.546067	0.157906	-3.45818	0.000543837	0.00563958
ENSMUSG00000063179	Pstk	124.91	-0.944955	0.273394	-3.45638	0.00054748	0.00567283
ENSMUSG00000020617	1700012B07Rik	7.3859	5.4104	1.56663	3.45352	0.000553315	0.00572973
ENSMUSG00000026770	Il2ra	13312.8	-0.421104	0.121944	-3.45327	0.00055383	0.00573151
ENSMUSG00000024480	Ap3s1	166.462	0.949065	0.274884	3.4526	0.000555204	0.00574216
ENSMUSG00000032741	Tpcn1	375.193	-0.826416	0.239592	-3.44927	0.000562107	0.00580995
ENSMUSG00000032041	Tirap	27.9651	2.04226	0.592548	3.44658	0.000567739	0.00586452
ENSMUSG00000005683	Cs	1487.21	0.390258	0.113253	3.4459	0.00056916	0.00587262
ENSMUSG00000018209	Stk4	3694.79	-0.342004	0.0992552	-3.4457	0.00056958	0.00587262
ENSMUSG00000104276	Gm37866	12.2109	3.3553	0.973762	3.44571	0.000569553	0.00587262
ENSMUSG00000037519	Ppfia1	846.121	-0.479508	0.139335	-3.4414	0.000578716	0.00596314
ENSMUSG00000028098	Rnf115	779.79	0.45813	0.13317	3.4402	0.00058129	0.00598595
ENSMUSG00000024953	Prdx5	1032.7	0.450779	0.131075	3.4391	0.000583657	0.00600662
ENSMUSG00000039159	Ube2h	993.478	-0.492154	0.143255	-3.43551	0.000591448	0.00608043
ENSMUSG00000064138	Fam172a	727.597	-0.473104	0.137712	-3.43546	0.000591559	0.00608043
ENSMUSG00000090185	Gm15523	6.10562	6.13574	1.78654	3.43443	0.000593806	0.00609978
ENSMUSG00000031950	Gabarapl2	693.36	0.555418	0.161735	3.43414	0.000594444	0.00610257
ENSMUSG00000028745	Capzb	5112.43	0.366898	0.106847	3.43386	0.000595055	0.00610508
ENSMUSG00000031504	Rab20	18.2241	2.81779	0.820916	3.43249	0.000598065	0.00613219
ENSMUSG00000035168	Tanc1	252.453	-0.698002	0.20346	-3.43065	0.000602135	0.00616633
ENSMUSG00000074064	Mlycd	173.831	0.804387	0.234464	3.43075	0.000601908	0.00616633
ENSMUSG00000040268	Plekha1	271.585	0.982323	0.28636	3.43037	0.000602752	0.00616887
ENSMUSG00000097431	Gm26782	253.815	0.671	0.195649	3.4296	0.000604462	0.00618257
ENSMUSG00000029587	Zfp12	196.246	-0.761802	0.222159	-3.42908	0.000605623	0.00619065
ENSMUSG00000097636	5830416P10Rik	756.76	-0.579017	0.168877	-3.42863	0.000606634	0.00619718
ENSMUSG00000032437	Stt3b	1142.45	0.480966	0.140308	3.42793	0.000608195	0.00620932
ENSMUSG00000015745	Plekho1	791.157	-0.46931	0.136977	-3.42619	0.000612111	0.00624407
ENSMUSG00000066258	Trim12a	705.939	0.548869	0.160203	3.42609	0.000612347	0.00624407
ENSMUSG00000027227	Sord	1009.39	-0.65937	0.192476	-3.42572	0.000613171	0.00624453
ENSMUSG00000036817	Sun1	353.197	0.634196	0.185136	3.42557	0.000613516	0.00624453
ENSMUSG00000095115	Itpripl2	148.374	1.07836	0.31477	3.42589	0.000612799	0.00624453
ENSMUSG00000106856	RP23-458A10.4	281.267	0.641753	0.187358	3.42527	0.000614179	0.00624747
ENSMUSG00000007589	Tinf2	106.368	1.02016	0.297876	3.42478	0.000615292	0.00624841
ENSMUSG00000030126	Tmcc1	158.999	0.861485	0.251543	3.4248	0.000615243	0.00624841
ENSMUSG00000039232	Stx11	54.0919	5.44661	1.59037	3.42474	0.000615397	0.00624841
ENSMUSG00000027469	Tpx2	1270.48	0.394236	0.11514	3.42398	0.000617116	0.00626205
ENSMUSG00000051331	Cacna1c	28.3032	-2.18284	0.637589	-3.42358	0.000618009	0.00626731
ENSMUSG00000025089	Gfra1	52.3654	-1.54945	0.452636	-3.42316	0.000618973	0.00626945
ENSMUSG00000068240	Gm11808	94.9253	-1.43196	0.418309	-3.4232	0.000618892	0.00626945
ENSMUSG00000021361	Tmem14c	1355.02	0.42329	0.123687	3.42227	0.000620999	0.00628615
ENSMUSG00000009741	Ubp1	787.276	-0.483024	0.141153	-3.42198	0.000621667	0.0062891
ENSMUSG00000039095	En2	7.65119	5.46382	1.59751	3.42021	0.000625738	0.00632644
ENSMUSG00000029580	Actb	87588.9	0.416906	0.121936	3.41905	0.000628411	0.00634961
ENSMUSG00000075266	Cenpw	784.385	0.46435	0.135848	3.41816	0.000630468	0.00636654
ENSMUSG00000027665	Pik3ca	1359.35	-0.379665	0.111101	-3.4173	0.000632463	0.00638282
ENSMUSG00000006699	Cdc42	4670.61	0.352145	0.103061	3.41686	0.000633474	0.00638915
ENSMUSG00000032594	Ip6k1	1190.59	-0.431612	0.126336	-3.41639	0.000634574	0.00639252
ENSMUSG00000070526	Peg12	12.0167	-3.67732	1.07638	-3.41639	0.000634569	0.00639252
ENSMUSG00000029174	Tbc1d1	566.083	0.584095	0.170978	3.41619	0.000635033	0.00639328
ENSMUSG00000026842	Abl1	892.741	-0.49347	0.14448	-3.41549	0.00063668	0.00640355
ENSMUSG00000105889	RP24-404P10.9	5.74357	6.04567	1.77011	3.41543	0.000636821	0.00640355
ENSMUSG00000052760	A630001G21Rik	305.557	-0.753332	0.220645	-3.41423	0.000639616	0.00642777
ENSMUSG00000042489	Clspn	893.535	0.417585	0.122323	3.4138	0.000640626	0.00643405
ENSMUSG00000001552	Jup	53.6542	1.47054	0.430787	3.41363	0.000641046	0.00643437
ENSMUSG00000050147	F2rl3	99.8855	-1.17945	0.34553	-3.41346	0.00064143	0.00643437
ENSMUSG00000025245	Lztfl1	483.143	0.550794	0.161389	3.41283	0.000642913	0.00644536
ENSMUSG00000026604	Ptpn14	284.486	-0.770072	0.22568	-3.41222	0.000644354	0.00645206
ENSMUSG00000068134	Zfp120	462.949	0.581376	0.170373	3.41238	0.000643988	0.00645206
ENSMUSG00000028419	Chmp5	1152.74	0.4444	0.130292	3.41081	0.000647694	0.00648161
ENSMUSG00000023249	Parp3	194.093	1.1799	0.346001	3.4101	0.000649383	0.00649304
ENSMUSG00000028251	Tstd3	163.602	0.980215	0.287452	3.41001	0.000649615	0.00649304
ENSMUSG00000103175	Gm37169	67.2928	1.50425	0.441167	3.40972	0.000650298	0.00649596
ENSMUSG00000046546	Fam43a	32.2312	2.04022	0.598477	3.40901	0.000651981	0.00650888
ENSMUSG00000049401	Ogfr	464.402	0.67722	0.198712	3.40805	0.000654282	0.00652794
ENSMUSG00000017652	Cd40	63.9845	4.82966	1.41781	3.40643	0.000658177	0.00656287
ENSMUSG00000073236	2500004C02Rik	55.2342	-1.37039	0.402404	-3.4055	0.000660422	0.00658132
ENSMUSG00000027180	Fbxo3	1292.02	-0.416773	0.122448	-3.40367	0.000664879	0.00662178
ENSMUSG00000028150	Rorc	26.0964	2.697	0.792811	3.40181	0.000669406	0.00665891
ENSMUSG00000038936	Sccpdh	118.215	0.947378	0.278484	3.40191	0.000669163	0.00665891
ENSMUSG00000070315	4930581F22Rik	360.739	-0.650972	0.191539	-3.39863	0.000677236	0.00673278
ENSMUSG00000002325	Irf9	627.996	0.556918	0.163883	3.39827	0.000678129	0.00673764
ENSMUSG00000021794	Glud1	1648.46	0.405823	0.119431	3.39796	0.000678907	0.00674136
ENSMUSG00000100320	Gm29417	17.6969	-2.70526	0.796181	-3.39779	0.000679322	0.00674146
ENSMUSG00000044734	Serpinb1a	1716.09	-1.13607	0.334374	-3.39759	0.000679831	0.0067425
ENSMUSG00000030142	Clec4e	354.03	-0.83597	0.246277	-3.39443	0.000687712	0.00681661
ENSMUSG00000041440	Gk5	38.7539	-1.88389	0.55518	-3.3933	0.000690557	0.00684074
ENSMUSG00000029096	Htra3	13.6273	3.00659	0.886529	3.39142	0.000695311	0.00688374
ENSMUSG00000049436	Upk1b	5.25956	5.91445	1.74439	3.39055	0.000697534	0.00690166
ENSMUSG00000074211	Sdhaf1	191.913	0.823429	0.242918	3.38974	0.000699587	0.00691786
ENSMUSG00000098519	Gm27166	5.25045	5.91233	1.74478	3.38858	0.000702545	0.006943
ENSMUSG00000058603	Rpl28-ps1	559.814	-0.639341	0.188812	-3.38612	0.000708878	0.00700143
ENSMUSG00000040537	Adam22	18.1084	2.61403	0.772111	3.38556	0.000710323	0.00701155
ENSMUSG00000032802	Srxn1	39.1688	1.71722	0.50728	3.38515	0.000711402	0.00701804
ENSMUSG00000092274	Neat1	4301.94	0.455813	0.134673	3.38458	0.000712872	0.00702838
ENSMUSG00000025001	Hells	1370.68	0.403839	0.119348	3.38371	0.000715127	0.00704645
ENSMUSG00000022636	Alcam	492.339	0.898173	0.26546	3.38346	0.000715794	0.00704886
ENSMUSG00000103591	Gm38365	157.278	-0.830607	0.24558	-3.38223	0.00071901	0.00707635
ENSMUSG00000105637	RP23-458G12.3	49.1272	-1.44685	0.428084	-3.37983	0.000725316	0.0071342
ENSMUSG00000026767	Fam188a	264.764	0.665265	0.196883	3.37898	0.00072754	0.00715185
ENSMUSG00000016942	Tmprss6	5.22224	5.90882	1.74881	3.37877	0.000728114	0.00715328
ENSMUSG00000020709	Adap2	8.97525	4.80166	1.42139	3.37815	0.000729754	0.00716517
ENSMUSG00000104118	Gm37298	390.894	-0.795564	0.235539	-3.37763	0.000731142	0.00717457
ENSMUSG00000011257	Pabpc4	3720.79	-0.407253	0.120611	-3.37658	0.000733918	0.00719758
ENSMUSG00000007880	Arid1a	3138.18	-0.478563	0.141758	-3.37591	0.000735722	0.00721088
ENSMUSG00000030189	Ybx3	1607.07	-0.453529	0.134349	-3.37575	0.000736139	0.00721088
ENSMUSG00000041921	Metap1d	286.097	-0.722376	0.214126	-3.3736	0.000741921	0.00726324
ENSMUSG00000028152	Tspan5	262.792	-0.681936	0.202151	-3.3734	0.000742468	0.00726434
ENSMUSG00000072620	Slfn2	883.691	1.2784	0.379112	3.37209	0.000746006	0.00729467
ENSMUSG00000057137	Tmem140	102.703	-1.04091	0.308737	-3.37152	0.000747546	0.00730544
ENSMUSG00000052713	Zfp608	549.982	-0.542784	0.161034	-3.37063	0.000749975	0.00732489
ENSMUSG00000059586	Nsmce2	807.479	0.48281	0.143366	3.36767	0.000758075	0.00739966
ENSMUSG00000054342	Kcnn4	1114.96	-0.469387	0.139432	-3.36642	0.000761504	0.00742444
ENSMUSG00000070868	Skint3	15.3261	3.1147	0.925202	3.36651	0.000761264	0.00742444
ENSMUSG00000021614	Vcan	19.4271	3.03809	0.902946	3.36465	0.00076642	0.00746801
ENSMUSG00000041781	Cpsf2	1191.39	-0.447187	0.132929	-3.36411	0.000767909	0.00747814
ENSMUSG00000040466	Blvrb	54.0218	1.6531	0.491502	3.36335	0.000770013	0.00748988
ENSMUSG00000080839	Gm11625	5.381	5.94851	1.76857	3.36346	0.000769718	0.00748988
ENSMUSG00000033478	Fam160b1	415.398	-0.682943	0.203087	-3.36282	0.000771519	0.00750015
ENSMUSG00000029714	Gigyf1	1000.13	-0.452239	0.134493	-3.36254	0.000772296	0.00750333
ENSMUSG00000029798	Herc6	305.208	0.834973	0.248341	3.3622	0.000773245	0.00750818
ENSMUSG00000075284	Wipf1	1513.36	0.368265	0.10954	3.36194	0.000773982	0.00751096
ENSMUSG00000021608	Lpcat1	52.6388	1.90914	0.568085	3.36066	0.00077757	0.00754
ENSMUSG00000027203	Dut	2444.98	0.366357	0.109017	3.36055	0.000777879	0.00754
ENSMUSG00000041859	Mcm3	3067.24	0.353372	0.105168	3.36007	0.000779219	0.0075486
ENSMUSG00000062372	Otof	5.10079	5.87391	1.74892	3.35859	0.000783413	0.00758482
ENSMUSG00000011884	Gltp	890.353	0.470906	0.140306	3.35628	0.000789989	0.00764405
ENSMUSG00000047539	Fbxo28	416.614	0.583035	0.173789	3.35484	0.000794105	0.00767942
ENSMUSG00000038718	Pbx3	77.1917	1.24167	0.370319	3.35296	0.000799516	0.00772726
ENSMUSG00000104145	D130019J16Rik	306.821	-0.923418	0.275514	-3.35162	0.000803402	0.00776033
ENSMUSG00000000673	Haao	203.229	-0.732106	0.218475	-3.35098	0.000805257	0.00776924
ENSMUSG00000024570	Rbfa	288.353	-0.72842	0.217367	-3.35111	0.000804896	0.00776924
ENSMUSG00000040785	Ttc3	5214.2	-0.305008	0.0910405	-3.35024	0.000807408	0.00778548
ENSMUSG00000102423	Gm37465	319.585	-0.698126	0.208423	-3.34957	0.000809375	0.00779994
ENSMUSG00000001999	Blvra	284.066	0.651472	0.194517	3.34919	0.000810488	0.00780165
ENSMUSG00000026358	Rgs1	421.67	1.88057	0.561492	3.34924	0.000810328	0.00780165
ENSMUSG00000007817	Zmiz1	1860.95	-0.340507	0.101702	-3.34808	0.00081374	0.00782466
ENSMUSG00000032942	Ucp3	5.4774	5.97595	1.7849	3.34805	0.000813817	0.00782466
ENSMUSG00000053819	Camk2d	1116.15	-0.516237	0.154328	-3.34507	0.000822614	0.00790468
ENSMUSG00000022337	Emc2	475.631	0.569743	0.17037	3.34415	0.00082534	0.00792631
ENSMUSG00000025041	Nt5c2	378.773	-0.555955	0.166306	-3.34296	0.000828906	0.00795597
ENSMUSG00000074151	Nlrc5	663.584	0.540375	0.161654	3.34279	0.000829396	0.00795609
ENSMUSG00000054871	Tmem158	74.087	1.52142	0.45516	3.34261	0.000829957	0.0079569
ENSMUSG00000030083	Abtb1	274.461	-0.695083	0.208225	-3.33814	0.000843409	0.00808122
ENSMUSG00000042894	Olfr1260	5.13685	5.88332	1.76264	3.33779	0.000844467	0.00808671
ENSMUSG00000031367	Ap1s2	196.797	0.890887	0.266936	3.33746	0.000845482	0.00809178
ENSMUSG00000026222	Sp100	543.231	0.7292	0.218517	3.33704	0.000846768	0.00809944
ENSMUSG00000037526	Atg14	233.384	-0.746428	0.223767	-3.33574	0.000850722	0.00813259
ENSMUSG00000037606	Osbpl5	179.446	0.782794	0.234807	3.33378	0.00085675	0.00818552
ENSMUSG00000030921	Trim30a	1470.16	0.42763	0.128285	3.33343	0.000857817	0.00818963
ENSMUSG00000048327	Ckap2l	706.447	0.510751	0.153226	3.33332	0.000858162	0.00818963
ENSMUSG00000027360	Hdc	24.2968	2.80151	0.841764	3.32814	0.000874276	0.00833863
ENSMUSG00000031447	Lamp1	1731.94	0.481578	0.144723	3.32758	0.000876048	0.00835075
ENSMUSG00000027379	Bub1	295.014	0.657417	0.197616	3.32675	0.000878658	0.00837085
ENSMUSG00000021451	Sema4d	856.224	0.478634	0.143911	3.32589	0.000881359	0.00839179
ENSMUSG00000004085	Zak	68.8413	1.55861	0.468872	3.32417	0.000886819	0.00843896
ENSMUSG00000034422	Parp14	582.71	0.544451	0.163795	3.32397	0.000887452	0.00844016
ENSMUSG00000048997	Atxn7l2	110.529	-0.961452	0.289284	-3.32355	0.000888781	0.0084434
ENSMUSG00000086060	Gm16084	61.7584	-1.47091	0.442572	-3.32355	0.000888805	0.0084434
ENSMUSG00000020914	Top2a	7305.72	0.288616	0.0868649	3.32259	0.000891873	0.00846771
ENSMUSG00000022468	Endou	419.047	-0.672448	0.202423	-3.32199	0.000893782	0.008481
ENSMUSG00000024056	Ndc80	572.945	0.510391	0.153667	3.32141	0.000895625	0.00849107
ENSMUSG00000085958	A930019D19Rik	105.892	-0.987491	0.297317	-3.32134	0.000895861	0.00849107
ENSMUSG00000025544	Tm9sf2	1837.88	0.434702	0.130917	3.32045	0.000898734	0.00851346
ENSMUSG00000004347	Pde1c	5.06474	5.86434	1.76662	3.31952	0.000901716	0.00853686
ENSMUSG00000048756	Foxo3	747.018	-0.525417	0.158299	-3.31915	0.000902935	0.00854354
ENSMUSG00000029577	Ube3b	491.461	-0.543115	0.163703	-3.31768	0.000907678	0.00858356
ENSMUSG00000074733	5830428H23Rik	766.123	-0.446781	0.134683	-3.31728	0.000908993	0.00859112
ENSMUSG00000022517	Mgrn1	201.468	-0.762564	0.230007	-3.31539	0.000915162	0.00864452
ENSMUSG00000020530	Ggnbp2	5002.12	-0.396505	0.119649	-3.31391	0.00092002	0.00868478
ENSMUSG00000022469	Rapgef3	354.213	-0.714018	0.21548	-3.31362	0.000920971	0.00868478
ENSMUSG00000032382	Snx1	1191.81	0.390882	0.117968	3.31346	0.000921507	0.00868478
ENSMUSG00000054889	Dsp	18.0829	3.13555	0.946281	3.31355	0.000921191	0.00868478
ENSMUSG00000020092	Pald1	16.1303	3.1311	0.945465	3.3117	0.000927301	0.00873444
ENSMUSG00000039168	Dap	1961.12	-0.439261	0.132676	-3.31078	0.000930352	0.00875823
ENSMUSG00000026450	Chit1	13.2859	-3.11946	0.942316	-3.31042	0.000931559	0.00876464
ENSMUSG00000006273	Atp6v1b2	1037.12	0.447866	0.135328	3.30949	0.000934665	0.0087889
ENSMUSG00000030798	Cd37	888.411	-0.543564	0.164274	-3.30888	0.000936692	0.008803
ENSMUSG00000045031	Cetn4	18.5991	3.06542	0.92654	3.30846	0.000938102	0.00881129
ENSMUSG00000061518	Cox5b	1817.37	0.358933	0.108515	3.30768	0.000940713	0.00883084
ENSMUSG00000032481	Smarcc1	5095.46	-0.444299	0.13434	-3.30726	0.000942131	0.00883918
ENSMUSG00000040675	Mthfd1l	642.314	0.501241	0.151622	3.30587	0.000946831	0.00887827
ENSMUSG00000044147	Arf6	3289.9	0.335332	0.10146	3.30507	0.000949512	0.00889841
ENSMUSG00000058318	Phf21a	1077.46	-0.432063	0.130772	-3.30393	0.000953403	0.00892985
ENSMUSG00000022255	Mtdh	9686.35	-0.302169	0.0914949	-3.30257	0.000958016	0.00896802
ENSMUSG00000027715	Ccna2	600.929	0.467232	0.141634	3.29886	0.00097078	0.0090824
ENSMUSG00000024309	Pfdn6	970.486	0.421773	0.127862	3.29867	0.000971433	0.00908342
ENSMUSG00000090086	AI480526	410.803	-0.61573	0.18671	-3.29778	0.00097452	0.00910717
ENSMUSG00000038525	Armc10	757.311	-0.556931	0.168905	-3.29729	0.000976209	0.00911785
ENSMUSG00000049625	Tifab	29.0083	2.13473	0.647475	3.297	0.00097722	0.00912218
ENSMUSG00000033610	Pank1	377.713	-0.661187	0.200663	-3.29501	0.000984189	0.0091821
ENSMUSG00000037499	Nenf	50.4255	1.56819	0.476032	3.29429	0.000986712	0.00920048
ENSMUSG00000021054	Sgpp1	164.686	0.889015	0.269924	3.29358	0.000989192	0.00921846
ENSMUSG00000074480	Mex3a	1270.38	-0.574777	0.174571	-3.29252	0.000992934	0.00924816
ENSMUSG00000030677	Kif22	476.004	0.506282	0.153795	3.29194	0.000995006	0.00926228
ENSMUSG00000027030	Stk39	72.4451	1.7474	0.530968	3.29096	0.000998451	0.00928916
ENSMUSG00000022090	Pdlim2	751.754	0.433949	0.131903	3.28991	0.00100219	0.00931873
ENSMUSG00000055799	Tcf7l1	30.4577	2.2145	0.673516	3.28797	0.00100912	0.00937792
ENSMUSG00000036718	Micall2	87.8084	-1.08756	0.330787	-3.2878	0.00100973	0.00937835
ENSMUSG00000075122	Cd80	51.033	5.72759	1.74233	3.28733	0.00101144	0.00938903
ENSMUSG00000004952	Rasa4	340.401	0.614787	0.1871	3.28587	0.0010167	0.00943258
ENSMUSG00000064210	Ano6	431.439	-0.58368	0.177669	-3.2852	0.00101908	0.00944947
ENSMUSG00000028693	Nasp	1707.59	0.40518	0.123397	3.28355	0.00102508	0.00949976
ENSMUSG00000030541	Idh2	1919.74	-0.440925	0.134335	-3.28229	0.00102969	0.00953723
ENSMUSG00000041779	Tram2	150.836	-0.856561	0.261015	-3.28166	0.00103199	0.0095532
ENSMUSG00000078919	Dpm1	182.524	-0.746384	0.227458	-3.28141	0.00103289	0.00955623
ENSMUSG00000028931	Kcnab2	626.716	-0.453671	0.138342	-3.27933	0.00104052	0.0096215
ENSMUSG00000010142	Tnfrsf13b	987.119	-0.437229	0.133371	-3.2783	0.00104436	0.0096516
ENSMUSG00000076866	Trdv2-2	5.04338	-5.72291	1.74683	-3.27616	0.00105228	0.00971942
ENSMUSG00000081550	Gm15877	4.88434	5.80824	1.7733	3.27539	0.00105516	0.00974064
ENSMUSG00000026942	Traf2	118.814	1.08132	0.330186	3.27489	0.00105702	0.00975243
ENSMUSG00000042524	Sun2	2741.78	-0.344449	0.105233	-3.2732	0.00106338	0.00980566
ENSMUSG00000025316	Banp	845.967	-0.429735	0.131336	-3.27202	0.00106783	0.00984124
ENSMUSG00000041975	Mettl8	246.675	-0.774378	0.236747	-3.27091	0.00107203	0.00987456
ENSMUSG00000025880	Smad7	187.532	-0.888136	0.271609	-3.26991	0.00107582	0.00990396
ENSMUSG00000057580	Gm10012	1204.54	0.375481	0.114948	3.26654	0.0010887	0.010017
ENSMUSG00000048329	Mfsd6l	5.0173	5.85182	1.79281	3.26406	0.00109829	0.0100996
ENSMUSG00000015843	Rxrg	5.22907	5.91013	1.8126	3.26059	0.00111181	0.0102183
ENSMUSG00000039741	Bahcc1	308.214	-0.724754	0.22229	-3.2604	0.00111256	0.0102197
ENSMUSG00000035696	Rnf38	643.969	-0.452004	0.138735	-3.25803	0.0011219	0.0102995
ENSMUSG00000058443	Rpl10-ps3	827.49	-0.543351	0.166781	-3.25788	0.00112249	0.0102995
ENSMUSG00000017778	Cox7c	2121.42	0.342906	0.105377	3.25408	0.00113761	0.0104325
ENSMUSG00000079111	Kdelr2	745.45	0.469887	0.144448	3.25298	0.00114202	0.0104624
ENSMUSG00000097160	A630072L19Rik	8.77111	4.07093	1.25146	3.25295	0.00114213	0.0104624
ENSMUSG00000014867	Surf4	458.355	0.578264	0.177806	3.25222	0.00114507	0.0104836
ENSMUSG00000030774	Pak1	235.637	0.914883	0.281345	3.25182	0.0011467	0.0104925
ENSMUSG00000105378	RP23-293K21.7	151.714	-0.891423	0.274143	-3.25167	0.0011473	0.0104925
ENSMUSG00000045328	Cenpe	2355.51	0.324613	0.0998366	3.25144	0.0011482	0.010495
ENSMUSG00000098008	A930001A20Rik	10.637	4.97802	1.53172	3.24995	0.00115425	0.0105444
ENSMUSG00000027805	Pfn2	55.2599	-1.5179	0.467338	-3.24796	0.00116237	0.0106128
ENSMUSG00000063193	Cd300lb	57.6831	1.43147	0.440871	3.24691	0.00116666	0.0106462
ENSMUSG00000026114	Cnga3	5.35785	5.94611	1.83159	3.24642	0.00116867	0.0106586
ENSMUSG00000059923	Grb2	2118.83	-0.332653	0.102474	-3.24623	0.00116946	0.01066
ENSMUSG00000036278	Macrod1	103.941	-1.05081	0.323728	-3.24597	0.00117053	0.010664
ENSMUSG00000025724	Sec11a	1127.15	0.411631	0.126856	3.24487	0.00117504	0.0106992
ENSMUSG00000033031	C330027C09Rik	993.785	0.404566	0.124688	3.24461	0.00117611	0.0107031
ENSMUSG00000014232	Cluap1	366.138	-0.564225	0.174045	-3.24184	0.00118761	0.0108013
ENSMUSG00000020399	Havcr2	184.336	-0.839157	0.258863	-3.2417	0.0011882	0.0108013
ENSMUSG00000027306	Nusap1	1665.41	0.361379	0.111516	3.2406	0.00119279	0.0108372
ENSMUSG00000070796	Psg21	8.51934	4.80601	1.48367	3.23927	0.00119837	0.010882
ENSMUSG00000001910	Nacc1	289.036	-0.615079	0.189927	-3.2385	0.00120158	0.0109052
ENSMUSG00000052310	Slc39a1	350.019	0.654365	0.202116	3.23757	0.00120554	0.0109351
ENSMUSG00000066357	Wdr6	143.097	-0.908571	0.280821	-3.23541	0.00121467	0.011012
ENSMUSG00000052040	Klf13	1551.11	0.347958	0.107563	3.23491	0.00121679	0.0110252
ENSMUSG00000021719	Rgs7bp	55.1407	-1.46119	0.451877	-3.2336	0.00122239	0.0110699
ENSMUSG00000001025	S100a6	260.412	2.02685	0.626991	3.23265	0.00122646	0.0111007
ENSMUSG00000020279	Il9r	30.1202	2.07852	0.64329	3.23108	0.00123322	0.0111534
ENSMUSG00000020642	Rnf144a	1076.64	-0.595445	0.184294	-3.23095	0.00123382	0.0111534
ENSMUSG00000026896	Ifih1	244.91	0.756317	0.234103	3.2307	0.00123486	0.0111534
ENSMUSG00000037679	Inf2	234.276	0.676942	0.209535	3.23068	0.00123496	0.0111534
ENSMUSG00000048100	Taf13	266.974	0.745143	0.230688	3.23009	0.00123752	0.0111705
ENSMUSG00000078942	Naip6	22.7516	2.25727	0.698859	3.22993	0.0012382	0.0111706
ENSMUSG00000026727	Rsu1	569.721	-0.491112	0.152122	-3.22842	0.00124478	0.0112238
ENSMUSG00000027602	Map1lc3a	23.6971	2.1706	0.672498	3.22767	0.00124802	0.0112324
ENSMUSG00000032328	Tmem30a	1428.05	0.440007	0.136324	3.22765	0.00124812	0.0112324
ENSMUSG00000042302	Ehbp1	4.80452	5.78659	1.79286	3.22758	0.00124842	0.0112324
ENSMUSG00000060470	Adgrg3	2971.2	-1.04212	0.322867	-3.2277	0.00124792	0.0112324
ENSMUSG00000066894	Vsig10	10.5169	3.89012	1.20555	3.22683	0.00125168	0.0112556
ENSMUSG00000054008	Ndst1	885.176	0.456961	0.141658	3.2258	0.00125623	0.0112905
ENSMUSG00000015149	Sirt2	522.099	0.566449	0.175615	3.22552	0.00125743	0.0112952
ENSMUSG00000030105	Arl8b	955.83	0.498561	0.154608	3.22468	0.00126112	0.0113222
ENSMUSG00000060962	Dmkn	4.94093	-5.69231	1.76553	-3.22414	0.00126352	0.0113377
ENSMUSG00000074671	Tspyl3	307.711	-0.647401	0.200809	-3.22397	0.00126427	0.0113383
ENSMUSG00000052296	Ppp6r1	1189.83	-0.380761	0.118132	-3.22317	0.00126779	0.0113637
ENSMUSG00000061132	Blnk	6.43055	5.21681	1.61948	3.22129	0.00127613	0.0114324
ENSMUSG00000025870	Arl10	100.328	1.06294	0.330016	3.22088	0.00127797	0.0114427
ENSMUSG00000025510	Cd151	312.844	-0.596975	0.185363	-3.22058	0.00127932	0.0114487
ENSMUSG00000000983	Wfdc18	13.8467	-3.61573	1.12288	-3.22004	0.00128174	0.0114641
ENSMUSG00000018920	Cxcl16	33.7404	2.13436	0.66294	3.21954	0.00128397	0.0114762
ENSMUSG00000106317	RP24-500I24.6	240.597	-0.646935	0.200947	-3.21943	0.00128447	0.0114762
ENSMUSG00000035637	Grhpr	370.433	0.67205	0.208932	3.2166	0.00129719	0.0115837
ENSMUSG00000034064	Poglut1	340.368	0.623147	0.193788	3.2156	0.00130171	0.0116178
ENSMUSG00000028599	Tnfrsf1b	591.301	0.578551	0.179949	3.21508	0.00130408	0.0116327
ENSMUSG00000050914	Ankrd37	86.8429	1.23798	0.38515	3.21427	0.00130775	0.0116593
ENSMUSG00000004552	Ctse	78.0945	-1.08574	0.337868	-3.21351	0.00131121	0.0116839
ENSMUSG00000050382	Kif7	56.0963	-1.56826	0.488526	-3.21018	0.00132652	0.0118139
ENSMUSG00000021687	Scamp1	148.17	-0.876858	0.273176	-3.20987	0.00132796	0.0118205
ENSMUSG00000062822	4833420G17Rik	1063.76	-0.374551	0.116781	-3.20729	0.00133991	0.0119205
ENSMUSG00000057329	Bcl2	8286.34	-0.301746	0.0941201	-3.20597	0.00134608	0.011969
ENSMUSG00000022303	Dcstamp	4.73836	5.76812	1.7993	3.20575	0.00134711	0.0119718
ENSMUSG00000030134	Rasgef1a	7.90731	4.69578	1.46537	3.2045	0.00135298	0.0120175
ENSMUSG00000029910	Mad2l1	458.314	0.573695	0.179129	3.2027	0.00136148	0.0120865
ENSMUSG00000026740	Dnajc1	1704.75	0.400616	0.125137	3.20143	0.00136748	0.0121269
ENSMUSG00000097353	A430046D13Rik	259.794	-0.78642	0.245641	-3.2015	0.00136713	0.0121269
ENSMUSG00000057895	Zfp105	4.83589	5.79108	1.80957	3.20025	0.00137306	0.01217
ENSMUSG00000063646	Jakmip1	607.597	-0.482802	0.150977	-3.19785	0.00138457	0.0122655
ENSMUSG00000007656	Arpp19	1650.16	0.408761	0.127839	3.19747	0.00138641	0.0122752
ENSMUSG00000002058	Unc119	246.389	0.730128	0.22836	3.19726	0.00138738	0.0122773
ENSMUSG00000006127	Inpp5k	422.614	-0.526934	0.164817	-3.19708	0.00138826	0.0122785
ENSMUSG00000079808	AC168977.1	66.7531	1.37004	0.428551	3.19691	0.00138907	0.0122792
ENSMUSG00000037685	Atp8a1	1584.09	0.523072	0.163657	3.19615	0.00139272	0.012305
ENSMUSG00000100215	Gm8292	102.324	-1.03251	0.32319	-3.19475	0.00139951	0.0123584
ENSMUSG00000069892	9930111J21Rik2	169.713	0.903129	0.282841	3.19306	0.00140775	0.0124246
ENSMUSG00000005566	Trim28	2580.71	-0.379757	0.11897	-3.19205	0.00141269	0.0124615
ENSMUSG00000030330	Ing4	779.855	-0.415767	0.130317	-3.19042	0.00142066	0.0125253
ENSMUSG00000049502	Dtx3l	1127.75	0.492584	0.154419	3.18991	0.00142316	0.0125407
ENSMUSG00000049532	Sall2	35.3761	-1.65822	0.519923	-3.18936	0.0014259	0.012553
ENSMUSG00000101013	A630072M18Rik	163.076	-0.756664	0.237249	-3.18932	0.00142607	0.012553
ENSMUSG00000017670	Elmo2	233.771	0.692677	0.217262	3.18821	0.00143158	0.0125949
ENSMUSG00000047412	Zbtb44	694.296	-0.525022	0.164685	-3.18804	0.00143243	0.0125957
ENSMUSG00000008999	Bmp7	6.31822	5.18954	1.62808	3.18753	0.00143496	0.0126113
ENSMUSG00000026544	Dusp23	193.569	-0.850708	0.266909	-3.18726	0.00143627	0.0126161
ENSMUSG00000039960	Rhou	15.9773	3.15185	0.989274	3.18602	0.00144244	0.0126637
ENSMUSG00000017167	Cntnap1	15.3	2.6767	0.840298	3.18542	0.00144546	0.0126835
ENSMUSG00000051998	Lax1	167.096	-0.894548	0.280847	-3.18518	0.00144665	0.0126873
ENSMUSG00000032047	Acat1	1252.47	0.375991	0.1181	3.18365	0.00145431	0.0127477
ENSMUSG00000020828	Pld2	10.0195	4.97422	1.56268	3.18312	0.00145697	0.0127576
ENSMUSG00000033871	Ppargc1b	152.987	-0.808037	0.253846	-3.18318	0.00145669	0.0127576
ENSMUSG00000022094	Slc39a14	60.2497	1.22289	0.384255	3.18251	0.00146006	0.012778
ENSMUSG00000041775	Mapk1ip1	288.575	-0.703099	0.220953	-3.18212	0.001462	0.0127883
ENSMUSG00000029290	Zfp326	923.484	-0.459934	0.14465	-3.17964	0.0014746	0.012888
ENSMUSG00000079298	Klrb1b	244.603	6.55571	2.06182	3.17957	0.00147494	0.012888
ENSMUSG00000029705	Cux1	4233.15	-0.381234	0.119924	-3.17896	0.00147807	0.0129017
ENSMUSG00000059305	Vpreb1	43.294	-1.47042	0.462546	-3.17897	0.00147798	0.0129017
ENSMUSG00000025795	Rassf3	58.0865	1.68494	0.530224	3.1778	0.00148399	0.0129331
ENSMUSG00000025959	Klf7	682.846	0.608507	0.191475	3.178	0.00148297	0.0129331
ENSMUSG00000066892	Fbxl12	689.202	-0.563964	0.177465	-3.17788	0.00148355	0.0129331
ENSMUSG00000086372	Gm16246	24.3358	-1.93743	0.609746	-3.17743	0.00148585	0.0129426
ENSMUSG00000037313	Tacc3	841.319	0.420765	0.132445	3.1769	0.00148859	0.0129597
ENSMUSG00000031207	Msn	4441.77	0.353089	0.111164	3.17629	0.0014917	0.0129732
ENSMUSG00000037174	Elf2	522.302	-0.473188	0.148972	-3.17635	0.0014914	0.0129732
ENSMUSG00000032089	Il10ra	483.571	-0.497947	0.156811	-3.17546	0.001496	0.0130038
ENSMUSG00000037533	Rapgef6	980.553	0.425389	0.134033	3.17377	0.00150471	0.0130727
ENSMUSG00000017309	Cd300lg	4.7233	5.76384	1.81683	3.17246	0.00151151	0.0131249
ENSMUSG00000059534	Uqcr10	1653.64	0.377871	0.119168	3.17092	0.00151957	0.0131881
ENSMUSG00000021190	Lgmn	42.6931	1.70078	0.536471	3.1703	0.00152281	0.0132093
ENSMUSG00000064370	mt-Cytb	84072.7	-0.274391	0.0866	-3.16849	0.00153235	0.0132852
ENSMUSG00000016257	Slmo2	587.435	0.507856	0.160299	3.16817	0.001534	0.0132925
ENSMUSG00000025323	Sp4	329.856	0.689314	0.217585	3.16801	0.00153484	0.0132929
ENSMUSG00000044456	Rin3	348.246	0.638298	0.201515	3.1675	0.00153757	0.0133096
ENSMUSG00000021890	Eaf1	371.595	0.724319	0.228742	3.16653	0.00154269	0.0133471
ENSMUSG00000040272	Accs	202.986	-0.775971	0.245098	-3.16597	0.00154568	0.013366
ENSMUSG00000020167	Tcf3	1274.2	-0.4091	0.12923	-3.16566	0.0015473	0.0133731
ENSMUSG00000029322	Plac8	17269.7	-0.481158	0.152111	-3.1632	0.00156044	0.0134796
ENSMUSG00000045065	9930022D16Rik	9.02976	4.73019	1.49562	3.16269	0.00156317	0.0134962
ENSMUSG00000005824	Tnfsf14	144.755	0.960255	0.303672	3.16214	0.00156612	0.0135147
ENSMUSG00000037815	Ctnna1	901.358	0.63675	0.201386	3.16184	0.00156776	0.0135218
ENSMUSG00000020323	Prss57	585.107	-0.543745	0.171989	-3.1615	0.00156957	0.0135304
ENSMUSG00000052369	Tmem106c	160.787	-0.808943	0.255964	-3.16037	0.00157568	0.0135761
ENSMUSG00000016756	Cmah	403.594	-1.53776	0.486685	-3.15966	0.00157954	0.0136023
ENSMUSG00000098274	Rpl24	1899.8	-0.371515	0.117591	-3.15938	0.00158103	0.0136081
ENSMUSG00000002379	Ndufa11	763.656	0.430141	0.136179	3.15865	0.00158502	0.013631
ENSMUSG00000039384	Dusp10	50.3789	1.33747	0.423439	3.15859	0.00158532	0.013631
ENSMUSG00000079853	Klra1	86.3932	1.03498	0.327874	3.15663	0.00159603	0.013716
ENSMUSG00000099881	2810013P06Rik	468.434	-0.51648	0.163665	-3.15571	0.00160106	0.0137521
ENSMUSG00000020661	Dnmt3a	1571.19	0.427082	0.135355	3.15527	0.00160352	0.0137662
ENSMUSG00000015837	Sqstm1	2027.5	0.372687	0.118183	3.15346	0.00161347	0.0138445
ENSMUSG00000022307	Oxr1	973.547	-0.434013	0.137651	-3.15299	0.00161605	0.0138595
ENSMUSG00000018372	Cep95	429.218	-0.549891	0.174438	-3.15236	0.00161956	0.0138753
ENSMUSG00000041439	Mfsd6	442.81	0.793291	0.251644	3.15243	0.00161919	0.0138753
ENSMUSG00000070858	Gm1673	18.1487	-2.43717	0.773473	-3.15094	0.00162748	0.013936
ENSMUSG00000006050	Sra1	471.502	0.517559	0.164369	3.14876	0.00163966	0.014033
ENSMUSG00000091694	Apol11b	4.48952	5.68796	1.80693	3.14787	0.00164467	0.0140687
ENSMUSG00000023828	Slc22a3	147.713	-1.01845	0.323591	-3.14734	0.00164765	0.0140814
ENSMUSG00000025780	Itih5	269.141	-0.777596	0.247067	-3.1473	0.00164784	0.0140814
ENSMUSG00000001288	Rarg	35.9617	1.85546	0.590056	3.14456	0.00166338	0.0141941
ENSMUSG00000063273	Naa15	3930.37	-0.297677	0.0946598	-3.1447	0.00166257	0.0141941
ENSMUSG00000097233	Gm17552	161.112	-0.922616	0.293404	-3.14452	0.00166359	0.0141941
ENSMUSG00000009210	2310007L24Rik	4.5023	5.69175	1.81026	3.14416	0.00166563	0.0142043
ENSMUSG00000010453	Kansl3	741.617	-0.414179	0.131748	-3.14373	0.00166808	0.0142179
ENSMUSG00000025241	Fyco1	309.609	0.669751	0.213101	3.14288	0.00167294	0.0142521
ENSMUSG00000056032	BC018473	7.83432	4.68696	1.49148	3.1425	0.00167513	0.0142634
ENSMUSG00000031714	Gab1	25.2803	-1.89518	0.603356	-3.14106	0.00168336	0.0143261
ENSMUSG00000016757	Ttll12	280.963	-0.607335	0.193467	-3.13922	0.00169397	0.0144091
ENSMUSG00000028312	Smc2	3464.63	0.302938	0.0965333	3.13817	0.00170004	0.0144533
ENSMUSG00000099517	Hist1h3g	30.1007	1.82404	0.58148	3.13688	0.00170754	0.0145097
ENSMUSG00000026068	Il18rap	852.266	1.2254	0.390663	3.13671	0.00170855	0.0145109
ENSMUSG00000004530	Coro1c	396.891	0.644154	0.205388	3.13629	0.00171102	0.0145245
ENSMUSG00000021936	Mapk8	540.942	-0.577024	0.184127	-3.13383	0.0017254	0.0146392
ENSMUSG00000009549	Srp14	2182.44	0.332888	0.106246	3.13317	0.00172927	0.0146571
ENSMUSG00000026201	Stk16	1018.91	-0.444389	0.141829	-3.13327	0.00172868	0.0146571
ENSMUSG00000004865	Srpk1	1454.72	-0.337528	0.107744	-3.13268	0.00173217	0.0146741
ENSMUSG00000057729	Prtn3	70.3336	-1.27159	0.406152	-3.13083	0.00174313	0.0147595
ENSMUSG00000061393	Acvr2b	106.366	-1.0549	0.336993	-3.13032	0.00174617	0.0147777
ENSMUSG00000059463	Spag11b	38.4919	-1.62858	0.520327	-3.12991	0.00174861	0.0147909
ENSMUSG00000059256	Gzmd	5.03868	5.85407	1.87121	3.1285	0.00175703	0.0148546
ENSMUSG00000041220	Elovl6	1069.53	-0.452723	0.144742	-3.12778	0.00176131	0.0148832
ENSMUSG00000024164	C3	25.744	2.63149	0.841775	3.12612	0.00177131	0.0149601
ENSMUSG00000034591	Slc41a2	26.3551	2.08867	0.668216	3.12573	0.00177362	0.014972
ENSMUSG00000038615	Nfe2l1	347.008	0.637223	0.203989	3.12381	0.00178526	0.0150617
ENSMUSG00000099767	Gm28884	7.91393	5.51275	1.76482	3.12368	0.00178604	0.0150617
ENSMUSG00000063019	Manbal	158.962	0.752035	0.240768	3.12348	0.00178725	0.0150642
ENSMUSG00000021693	Kif2a	1443.21	-0.355189	0.113754	-3.12244	0.00179357	0.0151099
ENSMUSG00000033938	Ndufb7	1247.28	0.379101	0.121426	3.12208	0.00179577	0.0151208
ENSMUSG00000002233	Rhoc	81.6174	1.39267	0.446175	3.12136	0.00180017	0.0151501
ENSMUSG00000026062	Slc9a2	70.7168	-1.17893	0.377935	-3.11939	0.00181228	0.0152443
ENSMUSG00000082826	Mif-ps3	205.907	0.705835	0.226363	3.11816	0.00181984	0.0153002
ENSMUSG00000084986	Gm16224	22.6612	2.31345	0.741989	3.1179	0.00182144	0.015306
ENSMUSG00000023048	Prr13	3032.36	0.357924	0.114867	3.11599	0.00183328	0.0153963
ENSMUSG00000040322	Slc25a24	372.81	0.801929	0.257382	3.11572	0.00183496	0.0153963
ENSMUSG00000042590	Ipo11	451.389	-0.530993	0.17042	-3.1158	0.00183447	0.0153963
ENSMUSG00000020941	Map3k14	226.876	0.871499	0.280088	3.11151	0.00186132	0.0156096
ENSMUSG00000046718	Bst2	348.485	-0.5532	0.177814	-3.11112	0.0018638	0.0156226
ENSMUSG00000028843	Sh3bgrl3	949.944	0.63561	0.204329	3.11072	0.00186632	0.0156358
ENSMUSG00000032294	Pkm	3441.07	0.367873	0.118277	3.11026	0.00186924	0.0156524
ENSMUSG00000037989	Wnk2	4.5569	-5.57691	1.7933	-3.10986	0.00187179	0.0156659
ENSMUSG00000032353	Tmed3	399.344	-0.533281	0.171571	-3.10823	0.00188213	0.0157445
ENSMUSG00000028796	Phc2	639.174	0.512751	0.165035	3.10693	0.00189044	0.0158062
ENSMUSG00000036896	C1qc	4.40831	5.66373	1.8231	3.10665	0.00189222	0.0158131
ENSMUSG00000026384	Ptpn4	190.158	0.681398	0.219352	3.10641	0.00189376	0.015818
ENSMUSG00000028223	Decr1	173.538	0.795213	0.25604	3.10582	0.00189752	0.0158415
ENSMUSG00000037824	Tspan14	716.725	-0.51479	0.165758	-3.10567	0.00189849	0.0158417
ENSMUSG00000026525	Opn3	41.3729	1.98026	0.637743	3.1051	0.00190212	0.015864
[truncated: 44,081 more rows]

## Sheet: Spi1_vs_Ctrl
	gene	baseMean	log2FoldChange	lfcSE	stat	pvalue	padj
ENSMUSG00000056054	S100a8	1515.62	5.06891	0.149002	34.0192	1.16071e-253	1.80468e-249
ENSMUSG00000025461	Cd163l1	3034.86	2.22722	0.076358	29.1681	4.92032e-187	3.82506e-183
ENSMUSG00000099413	Gm17767	621.932	3.38742	0.158344	21.3928	1.5582e-101	8.07563e-98
ENSMUSG00000023132	Gzma	8851.87	1.65614	0.0799779	20.7074	2.97073e-95	1.15472e-91
ENSMUSG00000056071	S100a9	1304.25	5.09577	0.258812	19.6891	2.67586e-86	8.32084e-83
ENSMUSG00000055435	Maf	449.058	3.34349	0.177413	18.8457	3.18496e-79	8.2533e-76
ENSMUSG00000063856	Gpx1	5155.05	-1.16568	0.0625532	-18.6351	1.66828e-77	3.7055e-74
ENSMUSG00000016494	Cd34	1089.76	-2.04786	0.113356	-18.0658	5.92984e-73	1.15247e-69
ENSMUSG00000022309	Angpt1	2177.82	-1.56309	0.0877102	-17.821	4.85434e-71	8.38613e-68
ENSMUSG00000034438	Gbp8	2006.68	1.32765	0.075364	17.6166	1.83857e-69	2.85861e-66
ENSMUSG00000079363	Gbp4	1490.73	1.89109	0.110009	17.1902	3.14275e-66	4.44213e-63
ENSMUSG00000033446	Lpar6	2420.32	1.54879	0.091409	16.9435	2.14899e-64	2.78438e-61
ENSMUSG00000026313	Hdac4	1437.52	1.61668	0.0965683	16.7413	6.55397e-63	7.83855e-60
ENSMUSG00000029322	Plac8	15513.1	-0.903619	0.0551806	-16.3756	2.8545e-60	3.17013e-57
ENSMUSG00000020009	Ifngr1	1639.57	1.98303	0.122421	16.1984	5.17635e-59	5.36546e-56
ENSMUSG00000029247	Paics	5003.48	-1.0711	0.0664149	-16.1274	1.63682e-58	1.59058e-55
ENSMUSG00000038418	Egr1	1175.29	-4.49714	0.284163	-15.8259	2.06084e-56	1.88482e-53
ENSMUSG00000020125	Elane	277.171	3.98833	0.253813	15.7137	1.21875e-55	1.05273e-52
ENSMUSG00000057113	Npm1	7415.71	-0.861647	0.0548809	-15.7003	1.50467e-55	1.23129e-52
ENSMUSG00000024677	Ms4a6b	1978.71	1.5607	0.100755	15.4901	4.04707e-54	3.14619e-51
ENSMUSG00000056290	Ms4a4b	1252.97	1.78122	0.117529	15.1556	6.96206e-52	5.15458e-49
ENSMUSG00000053310	Nrgn	3621.68	-1.40371	0.0926537	-15.15	7.57118e-52	5.35076e-49
ENSMUSG00000040253	Gbp7	4757.49	0.979921	0.0654256	14.9776	1.02801e-50	6.94934e-48
ENSMUSG00000029530	Ccr9	442.667	2.81501	0.188607	14.9252	2.2587e-50	1.46326e-47
ENSMUSG00000054072	Iigp1	324.481	3.415	0.228979	14.914	2.67082e-50	1.66104e-47
ENSMUSG00000031129	Slc9a9	1524	1.36939	0.0920093	14.8832	4.24007e-50	2.53556e-47
ENSMUSG00000054435	Gimap4	193.8	3.77354	0.253943	14.8598	6.01215e-50	3.46211e-47
ENSMUSG00000025362	Rps26	34074	-0.773657	0.0528914	-14.6273	1.88194e-48	1.04501e-45
ENSMUSG00000038400	Pmepa1	398.988	2.28314	0.15688	14.5534	5.5565e-48	2.97905e-45
ENSMUSG00000022468	Endou	1115.39	1.73146	0.120048	14.423	3.70744e-47	1.92144e-44
ENSMUSG00000032094	Cd3d	976.257	2.13635	0.152277	14.0293	1.03139e-44	5.17291e-42
ENSMUSG00000019960	Dusp6	444.516	-2.40942	0.171889	-14.0173	1.22127e-44	5.93384e-42
ENSMUSG00000060063	Alox5ap	1050.69	-1.79275	0.128572	-13.9436	3.4405e-44	1.62099e-41
ENSMUSG00000066621	Tecpr1	1509.36	1.37537	0.0993247	13.8472	1.32238e-43	6.04718e-41
ENSMUSG00000028522	Mier1	6940.89	1.04556	0.0777964	13.4397	3.54094e-41	1.57298e-38
ENSMUSG00000075269	Bex6	346.101	-3.11954	0.234959	-13.2769	3.14973e-40	1.36034e-37
ENSMUSG00000038037	Socs1	878.704	1.45781	0.109839	13.2722	3.35522e-40	1.40992e-37
ENSMUSG00000019907	Ppp1r12a	3509.48	1.12662	0.0850973	13.2392	5.20722e-40	2.13057e-37
ENSMUSG00000020120	Plek	303.137	-2.46495	0.188077	-13.1061	3.03955e-39	1.21177e-36
ENSMUSG00000048251	Bcl11b	9640.44	1.03352	0.0789731	13.087	3.90779e-39	1.51896e-36
ENSMUSG00000029178	Klf3	2461.09	1.32015	0.101295	13.0327	7.97173e-39	3.02303e-36
ENSMUSG00000032503	Arpp21	4400.91	1.05658	0.0811821	13.0149	1.0061e-38	3.72448e-36
ENSMUSG00000071561	BC100530	154.521	6.35466	0.493633	12.8732	6.36723e-38	2.30227e-35
ENSMUSG00000034349	Smc4	21335.1	0.771172	0.0604127	12.7651	2.56944e-37	9.07947e-35
ENSMUSG00000043505	Gimap5	846.557	1.56359	0.123372	12.6738	8.26165e-37	2.85449e-34
ENSMUSG00000049103	Ccr2	557.19	1.76397	0.139542	12.6411	1.25239e-36	4.23307e-34
ENSMUSG00000079018	Ly6c1	186.559	3.13074	0.247767	12.6358	1.33981e-36	4.4322e-34
ENSMUSG00000000861	Bcl11a	252.512	-2.95524	0.23417	-12.6201	1.63653e-36	5.30101e-34
ENSMUSG00000001911	Nfix	2093.51	-1.03395	0.0819864	-12.6112	1.83249e-36	5.8146e-34
ENSMUSG00000051314	Ffar2	498.742	-1.91468	0.152317	-12.5704	3.07232e-36	9.55368e-34
ENSMUSG00000015619	Gata3	2000.86	1.22503	0.0981672	12.479	9.71589e-36	2.96201e-33
ENSMUSG00000064262	Gimap8	300.892	2.99596	0.242669	12.3459	5.12831e-35	1.53337e-32
ENSMUSG00000000078	Klf6	1195.14	1.17454	0.0953996	12.3118	7.82455e-35	2.2954e-32
ENSMUSG00000054672	5830411N06Rik	849.685	2.09196	0.170552	12.2658	1.38277e-34	3.98136e-32
ENSMUSG00000031074	Fgf3	1445.49	-1.32379	0.108404	-12.2116	2.69481e-34	7.61798e-32
ENSMUSG00000052684	Jun	451.118	1.79575	0.147104	12.2074	2.83964e-34	7.88406e-32
ENSMUSG00000079597	Gm5483	119.009	4.62179	0.382377	12.087	1.2371e-33	3.37447e-31
ENSMUSG00000022106	Rcbtb2	2270.59	1.12703	0.0934217	12.0639	1.63818e-33	4.39145e-31
ENSMUSG00000030104	Edem1	965.649	1.28388	0.106686	12.0342	2.34971e-33	6.1921e-31
ENSMUSG00000024053	Emilin2	1558.17	-1.34729	0.112312	-11.996	3.73079e-33	9.66772e-31
ENSMUSG00000053113	Socs3	685.892	1.38942	0.116384	11.9382	7.48696e-33	1.90832e-30
ENSMUSG00000037652	Phc3	2485.03	1.14292	0.0958465	11.9245	8.81956e-33	2.21172e-30
ENSMUSG00000044533	Rps2	7893.32	-0.86102	0.0724174	-11.8897	1.33926e-32	3.3052e-30
ENSMUSG00000015950	Ncf1	833.523	-1.82499	0.153755	-11.8695	1.70497e-32	4.14201e-30
ENSMUSG00000011257	Pabpc4	3345.61	-0.812039	0.0686749	-11.8244	2.92002e-32	6.98468e-30
ENSMUSG00000054892	Txk	631.871	1.64927	0.140218	11.7622	6.11381e-32	1.44027e-29
ENSMUSG00000031355	Arhgap6	315.42	-2.1504	0.183854	-11.6963	1.332e-31	3.09103e-29
ENSMUSG00000024986	Hhex	661.163	-1.52311	0.131616	-11.5724	5.68975e-31	1.30094e-28
ENSMUSG00000029925	Tbxas1	315.728	-2.08421	0.181261	-11.4984	1.34371e-30	3.02782e-28
ENSMUSG00000026357	Rgs18	586.063	-1.59941	0.141079	-11.337	8.60602e-30	1.91152e-27
ENSMUSG00000057329	Bcl2	11742.8	0.636778	0.056303	11.3098	1.17316e-29	2.56904e-27
ENSMUSG00000034634	Ly6d	4828.27	0.864739	0.0764989	11.3039	1.25451e-29	2.70904e-27
ENSMUSG00000026104	Stat1	1103.97	1.56867	0.139171	11.2715	1.81427e-29	3.86414e-27
ENSMUSG00000024013	Fgd2	414.156	-2.12126	0.189272	-11.2075	3.7466e-29	7.87191e-27
ENSMUSG00000028965	Tnfrsf9	211.301	2.68972	0.240859	11.1672	5.90267e-29	1.22366e-26
ENSMUSG00000032035	Ets1	1531.45	1.35091	0.121847	11.0869	1.45186e-28	2.9702e-26
ENSMUSG00000034041	Lyl1	788.384	-1.3909	0.126109	-11.0293	2.75859e-28	5.57021e-26
ENSMUSG00000027778	Ift80	2019.22	0.922338	0.0837887	11.0079	3.50061e-28	6.97787e-26
ENSMUSG00000028544	Slc5a9	197.367	2.50735	0.227808	11.0064	3.55968e-28	7.00581e-26
ENSMUSG00000031785	Adgrg1	5959.74	-0.695623	0.0633629	-10.9784	4.85433e-28	9.43438e-26
ENSMUSG00000051124	Gimap9	2623.5	0.863839	0.0788671	10.9531	6.42082e-28	1.23248e-25
ENSMUSG00000034613	Ppm1h	785.637	1.69313	0.155335	10.8999	1.1538e-27	2.18771e-25
ENSMUSG00000061983	Rps12	11901.1	-0.585017	0.0544143	-10.7512	5.8524e-27	1.0963e-24
ENSMUSG00000034765	Dusp5	1479.52	-1.243	0.115967	-10.7186	8.32752e-27	1.54139e-24
ENSMUSG00000003161	Sri	3072.95	0.779578	0.0728788	10.6969	1.05237e-26	1.92496e-24
ENSMUSG00000025245	Lztfl1	687.972	1.31675	0.12318	10.6897	1.13769e-26	2.05683e-24
ENSMUSG00000016559	H3f3b	5049.96	-0.733571	0.0690231	-10.6279	2.21028e-26	3.95005e-24
ENSMUSG00000022584	Ly6c2	208.849	2.4571	0.231489	10.6143	2.55596e-26	4.51591e-24
ENSMUSG00000016756	Cmah	1059.01	1.33027	0.126233	10.5382	5.76076e-26	1.00638e-23
ENSMUSG00000092021	Gbp11	378.052	1.6263	0.15473	10.5106	7.72277e-26	1.33415e-23
ENSMUSG00000041954	Tnfrsf18	487.167	1.45809	0.138792	10.5056	8.14395e-26	1.39145e-23
ENSMUSG00000022283	Pabpc1	14712.7	-0.659986	0.0628677	-10.498	8.82246e-26	1.491e-23
ENSMUSG00000028832	Stmn1	2974.6	-0.934995	0.089076	-10.4966	8.95477e-26	1.49708e-23
ENSMUSG00000047867	Gimap6	447.498	1.54832	0.147855	10.4719	1.16292e-25	1.92351e-23
ENSMUSG00000020564	Atxn7l1	1825.79	0.959909	0.091838	10.4522	1.43165e-25	2.34308e-23
ENSMUSG00000009927	Rps25	10153.3	-0.600621	0.0574694	-10.4512	1.44757e-25	2.34445e-23
ENSMUSG00000020689	Itgb3	249.546	2.16811	0.207493	10.4491	1.47894e-25	2.34903e-23
ENSMUSG00000030287	Itpr2	3809.99	0.806415	0.0771762	10.449	1.48061e-25	2.34903e-23
ENSMUSG00000048163	Selplg	1822.77	0.895171	0.0858114	10.4318	1.77416e-25	2.78633e-23
ENSMUSG00000051506	Wdfy4	811.191	-1.57802	0.15225	-10.3647	3.58873e-25	5.57976e-23
ENSMUSG00000053560	Ier2	785.549	-1.55793	0.151049	-10.314	6.08885e-25	9.37321e-23
ENSMUSG00000032518	Rpsa	5284.89	-0.729017	0.0706933	-10.3124	6.1936e-25	9.44099e-23
ENSMUSG00000045328	Cenpe	1632.86	-0.85295	0.0828442	-10.2958	7.35819e-25	1.11073e-22
ENSMUSG00000061787	Rps17	9837.81	-0.745868	0.0725833	-10.276	9.03715e-25	1.35105e-22
ENSMUSG00000097476	Gm26583	176.631	2.73324	0.267263	10.2268	1.5044e-24	2.22766e-22
ENSMUSG00000044867	Gimap1os	444.817	1.55526	0.152697	10.1853	2.30753e-24	3.38467e-22
ENSMUSG00000058624	Gda	94.0846	4.79833	0.471639	10.1737	2.59737e-24	3.7742e-22
ENSMUSG00000019122	Ccl9	235.431	-2.31788	0.228003	-10.166	2.81187e-24	4.04805e-22
ENSMUSG00000024431	Nr3c1	1818.62	1.15346	0.113563	10.157	3.08473e-24	4.40013e-22
ENSMUSG00000026011	Ctla4	1081.22	1.3961	0.13754	10.1505	3.29536e-24	4.65784e-22
ENSMUSG00000034361	Cpne2	1690.37	0.980979	0.0972818	10.0839	6.50949e-24	9.11798e-22
ENSMUSG00000022472	Desi1	1662.97	0.853889	0.0849948	10.0464	9.53094e-24	1.3231e-21
ENSMUSG00000040760	Appl1	2526.3	0.710404	0.0710657	9.99645	1.57966e-23	2.17349e-21
ENSMUSG00000057841	Rpl32	21082	-0.573773	0.0574611	-9.98542	1.76547e-23	2.40786e-21
ENSMUSG00000047907	Tshz2	513.997	1.38382	0.138613	9.98335	1.80272e-23	2.43727e-21
ENSMUSG00000073555	Gm4951	258.031	2.06429	0.207932	9.92772	3.15382e-23	4.22721e-21
ENSMUSG00000027478	Dnmt3b	933.637	-1.00219	0.100961	-9.92653	3.19172e-23	4.24144e-21
ENSMUSG00000021728	Emb	1096.76	1.18582	0.119543	9.91958	3.42195e-23	4.50885e-21
ENSMUSG00000058799	Nap1l1	4473.65	-0.693537	0.0699839	-9.90995	3.76832e-23	4.92351e-21
ENSMUSG00000032228	Tcf12	4012.99	0.670961	0.0678397	9.8904	4.5821e-23	5.93687e-21
ENSMUSG00000025967	Eef1b2	12955.9	-0.546888	0.0553636	-9.87812	5.17964e-23	6.65562e-21
ENSMUSG00000005087	Cd44	691.368	-1.74833	0.177097	-9.87219	5.49494e-23	7.0029e-21
ENSMUSG00000034586	Hid1	409.058	1.57304	0.15986	9.84008	7.5649e-23	9.56253e-21
ENSMUSG00000025085	Ablim1	2134.69	0.845552	0.0859648	9.83602	7.87615e-23	9.87568e-21
ENSMUSG00000022419	Deptor	2152.25	-0.964193	0.0982993	-9.80874	1.0325e-22	1.28427e-20
ENSMUSG00000050108	Bpifc	250.316	-1.92597	0.196879	-9.78254	1.33804e-22	1.6511e-20
ENSMUSG00000075602	Ly6a	2028.64	0.851048	0.0870677	9.77456	1.44789e-22	1.77258e-20
ENSMUSG00000032399	Rpl4	27684.2	-0.539394	0.0552264	-9.76697	1.56053e-22	1.89556e-20
ENSMUSG00000021624	Cd180	140.385	-3.72861	0.383213	-9.72987	2.24879e-22	2.68955e-20
ENSMUSG00000047675	Rps8	8127.18	-0.587728	0.0605701	-9.70326	2.92003e-22	3.46569e-20
ENSMUSG00000032280	Tle3	2158.75	0.781595	0.0806599	9.69001	3.325e-22	3.91645e-20
ENSMUSG00000000276	Dgke	844.661	1.16343	0.120149	9.68323	3.553e-22	4.15353e-20
ENSMUSG00000047139	Cd24a	3563.48	0.809945	0.0836606	9.68132	3.62023e-22	4.20055e-20
ENSMUSG00000027203	Dut	1700.97	-0.77363	0.0799805	-9.67273	3.93748e-22	4.53481e-20
ENSMUSG00000020644	Id2	1843.13	0.898468	0.0935227	9.60695	7.47278e-22	8.54315e-20
ENSMUSG00000026576	Atp1b1	222.761	1.98766	0.207385	9.5844	9.29939e-22	1.05538e-19
ENSMUSG00000041836	Ptpre	3355.84	-0.652432	0.0682945	-9.55322	1.25728e-21	1.41654e-19
ENSMUSG00000005125	Ndrg1	1203.04	1.04914	0.110074	9.53121	1.55462e-21	1.73893e-19
ENSMUSG00000066892	Fbxl12	1261.82	1.03812	0.109566	9.47485	2.67144e-21	2.96682e-19
ENSMUSG00000030541	Idh2	1767.36	-0.757574	0.0799694	-9.47331	2.71125e-21	2.98968e-19
ENSMUSG00000097640	Gm20033	265.938	1.79796	0.190934	9.41666	4.65654e-21	5.09858e-19
ENSMUSG00000053168	9030619P08Rik	368.24	-1.97789	0.210234	-9.40807	5.05314e-21	5.49415e-19
ENSMUSG00000026353	Ubxn4	5511.03	0.572593	0.0609403	9.39597	5.66956e-21	6.12155e-19
ENSMUSG00000006360	Crip1	8688.45	0.554145	0.0590636	9.38218	6.46232e-21	6.92939e-19
ENSMUSG00000052837	Junb	508.882	-1.59942	0.170633	-9.37344	7.02093e-21	7.4768e-19
ENSMUSG00000029430	Ran	3407.32	-0.772641	0.0825097	-9.36424	7.65986e-21	8.10173e-19
ENSMUSG00000019942	Cdk1	828.922	-1.02239	0.109503	-9.33672	9.93686e-21	1.04391e-18
ENSMUSG00000021200	Asb2	172.724	2.33894	0.251015	9.31792	1.18647e-20	1.23807e-18
ENSMUSG00000000031	H19	541.405	1.36408	0.146858	9.2884	1.56626e-20	1.62348e-18
ENSMUSG00000026107	Nabp1	717.026	1.42548	0.154186	9.24518	2.3485e-20	2.41817e-18
ENSMUSG00000035126	Wdr78	484.489	1.57123	0.17012	9.23602	2.55829e-20	2.61686e-18
ENSMUSG00000026395	Ptprc	7940.94	0.540967	0.0587095	9.2143	3.13304e-20	3.18383e-18
ENSMUSG00000022982	Sod1	7209.56	-0.513096	0.0557231	-9.20795	3.32408e-20	3.35602e-18
ENSMUSG00000104876	Trdc	10325.9	0.702564	0.0768292	9.14449	5.99097e-20	6.00953e-18
ENSMUSG00000001143	Lman2l	920.14	0.941827	0.103947	9.06063	1.29705e-19	1.29273e-17
ENSMUSG00000020914	Top2a	5464.12	-0.613871	0.0678104	-9.05275	1.39413e-19	1.38063e-17
ENSMUSG00000079641	Rpl39	10935.8	-0.578393	0.0640777	-9.02643	1.77363e-19	1.74534e-17
ENSMUSG00000027368	Dusp2	2628.76	-1.88213	0.208538	-9.02535	1.79128e-19	1.75163e-17
ENSMUSG00000051285	Pcmtd1	3093.5	0.621476	0.0692172	8.97864	2.74133e-19	2.66389e-17
ENSMUSG00000053332	Gas5	9120.19	-0.623116	0.069548	-8.95952	3.26096e-19	3.14916e-17
ENSMUSG00000071644	Eef1g	4409.96	-0.620317	0.069478	-8.92825	4.32813e-19	4.15394e-17
ENSMUSG00000026048	Ercc5	645.238	1.08038	0.121041	8.92573	4.42773e-19	4.19771e-17
ENSMUSG00000067274	Rplp0	8829.02	-0.554496	0.0621204	-8.92615	4.41088e-19	4.19771e-17
ENSMUSG00000033577	Myo6	92.5303	3.70889	0.415591	8.92438	4.48203e-19	4.22343e-17
ENSMUSG00000022148	Fyb	4756.84	0.713873	0.0800767	8.91487	4.88381e-19	4.57431e-17
ENSMUSG00000044786	Zfp36	207.007	-2.02926	0.227734	-8.91062	5.0746e-19	4.72455e-17
ENSMUSG00000039081	Zfp503	222.98	-1.9407	0.217841	-8.90881	5.15818e-19	4.77378e-17
ENSMUSG00000060470	Adgrg3	3269.17	-0.67417	0.0761906	-8.84847	8.87294e-19	8.1631e-17
ENSMUSG00000025980	Hspd1	1150.64	-0.848403	0.0960571	-8.83228	1.02562e-18	9.38018e-17
ENSMUSG00000037754	Ppp1r16b	1091.19	0.871362	0.0987098	8.82751	1.07029e-18	9.73148e-17
ENSMUSG00000085971	Gm15411	579.41	1.25885	0.142682	8.82276	1.11668e-18	1.00943e-16
ENSMUSG00000098112	Bin2	1677.85	-1.07141	0.12146	-8.82109	1.13352e-18	1.01873e-16
ENSMUSG00000032238	Rora	2523.97	1.69716	0.192638	8.81013	1.25006e-18	1.11701e-16
ENSMUSG00000003882	Il7r	828.139	1.16164	0.132088	8.79444	1.4376e-18	1.27725e-16
ENSMUSG00000031004	Mki67	2042.08	-0.819802	0.0932555	-8.79093	1.48333e-18	1.31039e-16
ENSMUSG00000037940	Inpp4b	312.539	1.82132	0.207276	8.78697	1.53645e-18	1.34965e-16
ENSMUSG00000003363	Pld3	315.677	1.66174	0.189418	8.77286	1.74189e-18	1.52059e-16
ENSMUSG00000030579	Tyrobp	332.182	-1.99606	0.227542	-8.77229	1.75061e-18	1.52059e-16
ENSMUSG00000032187	Smarca4	5169.36	0.623509	0.0711036	8.76901	1.80238e-18	1.55685e-16
ENSMUSG00000040723	Rcsd1	2871.97	0.607485	0.0693129	8.76438	1.87803e-18	1.61324e-16
ENSMUSG00000000409	Lck	3869.72	0.607471	0.0694608	8.74552	2.21989e-18	1.89642e-16
ENSMUSG00000056394	Lig1	2519	-0.641813	0.0735601	-8.72501	2.66162e-18	2.26136e-16
ENSMUSG00000040225	Prrc2c	13130.5	0.533804	0.0612254	8.71866	2.81511e-18	2.37877e-16
ENSMUSG00000051391	Ywhag	1863.28	-0.735173	0.0846105	-8.68891	3.65941e-18	3.07549e-16
ENSMUSG00000027347	Rasgrp1	823.368	1.06461	0.122723	8.67492	4.13826e-18	3.45923e-16
ENSMUSG00000040054	Baz2a	2294.56	0.631499	0.072821	8.67194	4.24837e-18	3.53228e-16
ENSMUSG00000021474	Sfxn1	2011.21	-0.729768	0.0849015	-8.59547	8.29264e-18	6.85819e-16
ENSMUSG00000028234	Rps20	21041.1	-0.534317	0.0624144	-8.56079	1.12094e-17	9.22137e-16
ENSMUSG00000020395	Itk	338.241	1.57216	0.184189	8.53553	1.39511e-17	1.14164e-15
ENSMUSG00000026360	Rgs2	2342.04	-0.732108	0.0859449	-8.51834	1.61851e-17	1.31752e-15
ENSMUSG00000092341	Malat1	39036.3	0.600796	0.0707947	8.48645	2.13037e-17	1.72515e-15
ENSMUSG00000073412	Lst1	348.137	-1.51478	0.17893	-8.46578	2.54435e-17	2.04971e-15
ENSMUSG00000038900	Rpl12	11000.7	-0.473358	0.0560664	-8.44282	3.09783e-17	2.48274e-15
ENSMUSG00000030742	Lat	1699.81	0.842684	0.0998288	8.44129	3.13842e-17	2.50237e-15
ENSMUSG00000106205	RP23-326O2.2	477.014	1.27485	0.151137	8.43504	3.31103e-17	2.62652e-15
ENSMUSG00000027692	Tnik	592.922	1.0828	0.128481	8.42767	3.52607e-17	2.78291e-15
ENSMUSG00000026656	Fcgr2b	203.784	-2.11385	0.250925	-8.42422	3.63148e-17	2.85163e-15
ENSMUSG00000012848	Rps5	18002.7	-0.445228	0.0528637	-8.42217	3.6956e-17	2.8874e-15
ENSMUSG00000019820	Utrn	3325.47	0.82144	0.0976446	8.41255	4.0118e-17	3.10325e-15
ENSMUSG00000049866	Arl4c	1144.11	0.86975	0.103384	8.41277	4.00432e-17	3.10325e-15
ENSMUSG00000003541	Ier3	1132.3	-1.10161	0.131231	-8.39441	4.68244e-17	3.60409e-15
ENSMUSG00000063109	Dgkeos	119.098	2.46466	0.293765	8.38991	4.86494e-17	3.72611e-15
ENSMUSG00000039637	Coro7	2283.36	0.776134	0.0927227	8.37048	5.73816e-17	4.37338e-15
ENSMUSG00000030530	Furin	573.463	1.19041	0.142233	8.36947	5.78802e-17	4.38986e-15
ENSMUSG00000023952	Gtpbp2	1244.39	0.927545	0.111621	8.30978	9.58801e-17	7.23662e-15
ENSMUSG00000030536	Iqgap1	4742.26	0.504398	0.060792	8.29711	1.06671e-16	8.01219e-15
ENSMUSG00000015355	Cd48	1826.98	-0.702087	0.0847779	-8.28149	1.21639e-16	9.09249e-15
ENSMUSG00000038604	Fam65a	1984.81	-0.707337	0.0855602	-8.26713	1.37218e-16	1.0208e-14
ENSMUSG00000026308	Klhl30	148.058	-2.70862	0.327773	-8.2637	1.41224e-16	1.0456e-14
ENSMUSG00000008668	Rps18	8694.42	-0.521358	0.0631303	-8.25845	1.47574e-16	1.08743e-14
ENSMUSG00000106037	RP23-235E15.1	9964.43	-0.636652	0.0771093	-8.25648	1.50026e-16	1.10028e-14
ENSMUSG00000078193	Gm2000	7512.81	-0.486566	0.0591108	-8.23142	1.85007e-16	1.35046e-14
ENSMUSG00000035891	Cerk	769.09	0.953911	0.115911	8.22971	1.87664e-16	1.36346e-14
ENSMUSG00000027677	Ttc14	2501.43	0.603515	0.0733861	8.22383	1.97106e-16	1.4254e-14
ENSMUSG00000029771	Irf5	115.412	-2.83896	0.345235	-8.22326	1.98046e-16	1.42556e-14
ENSMUSG00000043931	Gimap7	128.801	2.16561	0.264203	8.19676	2.46962e-16	1.76948e-14
ENSMUSG00000028639	Ybx1	7091.03	-0.496584	0.0607082	-8.17985	2.84194e-16	2.0269e-14
ENSMUSG00000026355	Mcm6	2445.31	-0.69822	0.0854602	-8.17013	3.0807e-16	2.18715e-14
ENSMUSG00000017716	Birc5	1001.63	-0.888189	0.108749	-8.16734	3.15261e-16	2.22803e-14
ENSMUSG00000001403	Ube2c	608.43	-1.0193	0.125146	-8.14488	3.79656e-16	2.67099e-14
ENSMUSG00000040459	Arglu1	7382.81	0.491702	0.0604018	8.14052	3.93576e-16	2.74409e-14
ENSMUSG00000041481	Serpina3g	355.435	-1.74965	0.214919	-8.14099	3.92062e-16	2.74409e-14
ENSMUSG00000041187	Prkd2	506.244	1.26642	0.155802	8.1284	4.34982e-16	3.01924e-14
ENSMUSG00000030744	Rps3	16076.4	-0.461552	0.0568045	-8.12527	4.4637e-16	3.08452e-14
ENSMUSG00000056145	AI504432	1521.64	0.784632	0.0965821	8.12399	4.51116e-16	3.10352e-14
ENSMUSG00000030189	Ybx3	1440.59	-0.8814	0.108656	-8.11187	4.98467e-16	3.41417e-14
ENSMUSG00000024538	Ppic	514.73	-1.05381	0.130021	-8.10487	5.28e-16	3.60059e-14
ENSMUSG00000029924	Slc37a3	215.536	1.70275	0.21058	8.08601	6.16519e-16	4.18587e-14
ENSMUSG00000073940	Hbb-bt	4155.44	-2.64777	0.327653	-8.08102	6.42272e-16	4.34176e-14
ENSMUSG00000046480	Scn4b	277.476	1.75415	0.217286	8.07299	6.85959e-16	4.61701e-14
ENSMUSG00000027435	Cd93	1708.98	-0.857799	0.106371	-8.06424	7.36935e-16	4.93874e-14
ENSMUSG00000023004	Tuba1b	2868.73	-0.605721	0.0755827	-8.01402	1.11018e-15	7.40818e-14
ENSMUSG00000032298	Neil1	320.733	1.37337	0.171571	8.00466	1.19799e-15	7.96001e-14
ENSMUSG00000075289	Carns1	578.742	1.12015	0.140029	7.99938	1.25049e-15	8.27348e-14
ENSMUSG00000031749	St3gal2	553.921	-1.00139	0.125433	-7.98348	1.42261e-15	9.37234e-14
ENSMUSG00000026012	Cd28	684.999	1.11968	0.140351	7.9777	1.49079e-15	9.7801e-14
ENSMUSG00000038872	Zfhx3	419.48	-1.25927	0.158026	-7.96878	1.60252e-15	1.04689e-13
ENSMUSG00000025491	Ifitm1	21203.4	-0.596249	0.0749271	-7.95773	1.75226e-15	1.13993e-13
ENSMUSG00000041235	Chd7	52.2729	4.07249	0.512833	7.94116	2.00295e-15	1.29758e-13
ENSMUSG00000025794	Rpl14	9845.38	-0.547464	0.0690123	-7.93284	2.1419e-15	1.38184e-13
ENSMUSG00000031765	Mt1	1911.72	-0.853855	0.107799	-7.9208	2.3599e-15	1.51619e-13
ENSMUSG00000037805	Rpl10a	7518.84	-0.602109	0.0761925	-7.90247	2.73437e-15	1.74955e-13
ENSMUSG00000011752	Pgam1	1471.3	-0.928924	0.117644	-7.89604	2.87914e-15	1.83462e-13
ENSMUSG00000049717	Lig4	329.348	1.58074	0.200387	7.88845	3.0596e-15	1.94166e-13
ENSMUSG00000038252	Ncapd2	1771.35	-0.801188	0.101643	-7.88234	3.21307e-15	2.03076e-13
ENSMUSG00000055093	Gm8430	3353.32	-0.688441	0.087482	-7.86951	3.56031e-15	2.24112e-13
ENSMUSG00000020372	Gnb2l1	20494.9	-0.402448	0.0511442	-7.86889	3.57808e-15	2.24323e-13
ENSMUSG00000052384	Nrros	2533.87	-0.632174	0.0804118	-7.8617	3.78947e-15	2.36621e-13
ENSMUSG00000044734	Serpinb1a	1967.21	-0.599784	0.0767286	-7.81696	5.41155e-15	3.36555e-13
ENSMUSG00000025357	Dgka	445.006	1.0967	0.140837	7.78703	6.86031e-15	4.24957e-13
ENSMUSG00000002111	Spi1	372.805	-1.69039	0.217103	-7.78613	6.90908e-15	4.26279e-13
ENSMUSG00000034593	Myo5a	400.659	-1.20455	0.154819	-7.78037	7.23133e-15	4.44398e-13
ENSMUSG00000031295	Phka2	355.955	-1.29805	0.166914	-7.77676	7.44081e-15	4.53685e-13
ENSMUSG00000042745	Id1	312.866	-1.36567	0.175599	-7.77721	7.41426e-15	4.53685e-13
ENSMUSG00000026070	Il18r1	266.419	1.76751	0.227425	7.77184	7.73526e-15	4.69796e-13
ENSMUSG00000037999	Arap2	798.917	-0.869232	0.111875	-7.76968	7.86832e-15	4.76018e-13
ENSMUSG00000006728	Cdk4	1709.53	-0.753791	0.0972341	-7.75233	9.02189e-15	5.43691e-13
ENSMUSG00000025203	Scd2	2350.52	-0.598255	0.0773048	-7.73891	1.00272e-14	6.01943e-13
ENSMUSG00000029823	Luc7l2	5911.38	0.45341	0.0586689	7.72827	1.09014e-14	6.51906e-13
ENSMUSG00000090272	Mndal	5237.36	0.464305	0.0601021	7.72527	1.11617e-14	6.64914e-13
ENSMUSG00000028337	Coro2a	972.434	-0.841774	0.109017	-7.72148	1.14982e-14	6.82346e-13
ENSMUSG00000034342	Cbl	1303.97	0.762682	0.0988425	7.71613	1.19913e-14	7.08898e-13
ENSMUSG00000029648	Flt1	330.712	-1.30595	0.169418	-7.70843	1.27376e-14	7.50165e-13
ENSMUSG00000076617	Ighm	658.333	1.04481	0.135573	7.70656	1.2925e-14	7.58333e-13
ENSMUSG00000002028	Kmt2a	6938.84	0.538875	0.0700088	7.69724	1.3904e-14	8.12702e-13
ENSMUSG00000001472	Tcf25	6810.15	0.41713	0.0542597	7.68766	1.49848e-14	8.726e-13
ENSMUSG00000023944	Hsp90ab1	33366.4	-0.400712	0.0521297	-7.68683	1.50828e-14	8.75025e-13
ENSMUSG00000029672	Fam3c	754.832	-0.915952	0.119222	-7.68273	1.55739e-14	9.00157e-13
ENSMUSG00000028657	Ppt1	1539.87	0.850582	0.110998	7.66302	1.81611e-14	1.04581e-12
ENSMUSG00000059923	Grb2	1968.47	-0.602425	0.0786506	-7.6595	1.86653e-14	1.07088e-12
ENSMUSG00000020901	Pik3r5	363.917	1.26218	0.164929	7.65287	1.9655e-14	1.12352e-12
ENSMUSG00000028044	Cks1b	1356.16	-0.845347	0.110515	-7.64918	2.02261e-14	1.15192e-12
ENSMUSG00000054604	Cggbp1	1448.01	-0.729073	0.0953861	-7.64339	2.11581e-14	1.20061e-12
ENSMUSG00000022708	Zbtb20	3100.84	0.526304	0.0689234	7.63607	2.2395e-14	1.26617e-12
ENSMUSG00000061315	Naca	5664.49	-0.554041	0.0726253	-7.62877	2.3701e-14	1.33516e-12
ENSMUSG00000005583	Mef2c	229.454	-1.85786	0.243709	-7.6233	2.47275e-14	1.38795e-12
ENSMUSG00000039697	Ncoa7	1211.29	-0.795685	0.104528	-7.61219	2.69487e-14	1.50719e-12
ENSMUSG00000033177	Tmprss7	212.466	-1.81851	0.238993	-7.60904	2.76137e-14	1.53885e-12
ENSMUSG00000050732	Vamp8	486.144	-1.05334	0.138449	-7.6081	2.78153e-14	1.54455e-12
ENSMUSG00000035835	Lppr3	72.1944	-2.8751	0.378717	-7.59169	3.15753e-14	1.74709e-12
ENSMUSG00000064373	Sepp1	1585.79	-0.655226	0.0863328	-7.58954	3.21049e-14	1.7701e-12
ENSMUSG00000020577	Tspan13	5718.15	0.444642	0.0586339	7.58336	3.36725e-14	1.84996e-12
ENSMUSG00000020460	Rps27a	5514.69	-0.623103	0.0822115	-7.57927	3.47499e-14	1.90243e-12
ENSMUSG00000033295	Ptprf	423.911	1.25238	0.165327	7.57516	3.58698e-14	1.95686e-12
ENSMUSG00000003573	Homer3	762.58	-0.847942	0.112088	-7.56497	3.87951e-14	2.1017e-12
ENSMUSG00000026483	Fam129a	422.679	1.27988	0.169181	7.56514	3.87437e-14	2.1017e-12
ENSMUSG00000103662	Gm34294	220.996	1.83713	0.243289	7.55123	4.31173e-14	2.32774e-12
ENSMUSG00000020614	Fam20a	2004.28	0.629586	0.0835037	7.53962	4.71349e-14	2.53583e-12
ENSMUSG00000031264	Btk	250.048	-1.71758	0.228168	-7.52769	5.16469e-14	2.76899e-12
ENSMUSG00000073411	H2-D1	7318.56	0.431892	0.0574321	7.52005	5.4755e-14	2.92553e-12
ENSMUSG00000024290	Rock1	6411.48	0.46419	0.0617551	7.51662	5.6211e-14	2.99126e-12
ENSMUSG00000030365	Clec2i	533.639	1.24139	0.165161	7.51625	5.63699e-14	2.99126e-12
ENSMUSG00000028496	Mllt3	1784.15	0.795819	0.106172	7.49557	6.60114e-14	3.49097e-12
ENSMUSG00000039646	Vasn	470.684	1.34721	0.180016	7.48382	7.21919e-14	3.80488e-12
ENSMUSG00000026605	Cenpf	1400.57	-0.715433	0.0957786	-7.46966	8.04046e-14	4.22342e-12
ENSMUSG00000002204	Napsa	2319.33	-0.617365	0.0826799	-7.46693	8.20848e-14	4.28273e-12
ENSMUSG00000073010	Gm5127	60.3076	3.27911	0.439134	7.46723	8.19e-14	4.28273e-12
ENSMUSG00000018168	Ikzf3	47.5668	6.19492	0.8309	7.45567	8.94102e-14	4.64933e-12
ENSMUSG00000022010	Tsc22d1	3340.75	0.505844	0.0678907	7.45085	9.27392e-14	4.80636e-12
ENSMUSG00000000682	Cd52	2082.35	-0.649728	0.0873525	-7.438	1.02224e-13	5.28034e-12
ENSMUSG00000062070	Pgk1	1929.67	-0.803324	0.108022	-7.43666	1.0326e-13	5.31619e-12
ENSMUSG00000004266	Ptpn6	1257.72	-0.812094	0.109222	-7.43526	1.0436e-13	5.3551e-12
ENSMUSG00000016194	Hsd11b1	431.241	1.17043	0.157441	7.43412	1.05267e-13	5.38384e-12
ENSMUSG00000054766	Set	4916.18	-0.560608	0.0755406	-7.42128	1.15992e-13	5.91295e-12
ENSMUSG00000066877	Nck2	1594.87	0.697811	0.094095	7.41602	1.2069e-13	6.13229e-12
ENSMUSG00000028211	Trp53inp1	2741.82	0.733644	0.0989692	7.41285	1.23613e-13	6.26039e-12
ENSMUSG00000086610	Gm15408	158.224	1.8601	0.250961	7.41191	1.24492e-13	6.28443e-12
ENSMUSG00000030199	Etv6	3219.91	-0.503327	0.0682662	-7.373	1.66831e-13	8.39447e-12
ENSMUSG00000073274	Gm14636	385.213	-1.1624	0.157693	-7.37131	1.68964e-13	8.47436e-12
ENSMUSG00000026748	Plxdc2	956.903	0.84486	0.114711	7.3651	1.7702e-13	8.84988e-12
ENSMUSG00000025790	Slco3a1	587.166	-1.18998	0.161597	-7.36385	1.78675e-13	8.90399e-12
ENSMUSG00000048249	Crebrf	1437.38	0.713316	0.0968833	7.36263	1.80328e-13	8.95765e-12
ENSMUSG00000026626	Ppp2r5a	1694.71	0.619045	0.0841865	7.35326	1.93428e-13	9.57777e-12
ENSMUSG00000027160	Ccdc34	1504.26	-0.682342	0.092844	-7.34934	1.99193e-13	9.83191e-12
ENSMUSG00000016319	Slc25a5	2352.38	-0.593113	0.0807141	-7.34833	2.00703e-13	9.84396e-12
ENSMUSG00000047534	Mis18bp1	822.869	-0.872653	0.118752	-7.34854	2.00391e-13	9.84396e-12
ENSMUSG00000033107	Rnf125	192.899	1.68133	0.22904	7.34077	2.12366e-13	1.03832e-11
ENSMUSG00000028312	Smc2	2649.91	-0.51355	0.070163	-7.3194	2.49091e-13	1.21407e-11
ENSMUSG00000029177	Cenpa	624.533	-1.00388	0.13756	-7.29777	2.92573e-13	1.42154e-11
ENSMUSG00000017493	Igfbp4	6934.01	-0.552778	0.0757914	-7.29342	3.02194e-13	1.46371e-11
ENSMUSG00000047454	Gphn	712.316	0.907631	0.125166	7.25142	4.12413e-13	1.99137e-11
ENSMUSG00000046985	Tapt1	1873.54	0.666134	0.0919316	7.24598	4.29332e-13	2.06664e-11
ENSMUSG00000024590	Lmnb1	1869.37	-0.673752	0.0932201	-7.22755	4.91803e-13	2.36005e-11
ENSMUSG00000029622	Arpc1b	10280.8	-0.437335	0.0606607	-7.20954	5.61433e-13	2.68589e-11
ENSMUSG00000026832	Cytip	818.409	0.860966	0.119456	7.20737	5.70429e-13	2.72056e-11
ENSMUSG00000037905	Bri3bp	1129.5	-0.776417	0.107883	-7.19684	6.16231e-13	2.93002e-11
ENSMUSG00000041841	Rpl37	26616.3	-0.362406	0.0503943	-7.19141	6.41278e-13	3.03981e-11
ENSMUSG00000034171	Faah	151.913	2.26057	0.314458	7.18877	6.53779e-13	3.08965e-11
ENSMUSG00000025068	Gsto1	860.612	-0.758741	0.10566	-7.18094	6.92334e-13	3.26194e-11
ENSMUSG00000040204	2810417H13Rik	2037.98	-0.765865	0.106826	-7.16929	7.53903e-13	3.54129e-11
ENSMUSG00000056220	Pla2g4a	196.143	-1.66766	0.232771	-7.16436	7.81489e-13	3.65982e-11
ENSMUSG00000090164	BC035044	946.075	-0.79745	0.111401	-7.15839	8.16313e-13	3.81142e-11
ENSMUSG00000060036	Rpl3	3854.18	-0.599152	0.0838197	-7.1481	8.79859e-13	4.09582e-11
ENSMUSG00000023150	Ivns1abp	3421.71	-0.527068	0.0738189	-7.14001	9.33211e-13	4.33121e-11
ENSMUSG00000050965	Prkca	2304.55	0.522139	0.0731491	7.13801	9.46887e-13	4.38161e-11
ENSMUSG00000039013	Siglecf	200.97	-1.77201	0.248659	-7.12628	1.03121e-12	4.75766e-11
ENSMUSG00000071713	Csf2rb	246.374	-1.44025	0.202247	-7.12125	1.06952e-12	4.91978e-11
ENSMUSG00000028332	Hemgn	265.72	-1.83012	0.257375	-7.11073	1.15435e-12	5.29432e-11
ENSMUSG00000061311	Rag1	444.194	1.42635	0.200603	7.11031	1.15783e-12	5.29467e-11
ENSMUSG00000027227	Sord	983.707	-0.773671	0.108824	-7.10937	1.16573e-12	5.29966e-11
ENSMUSG00000027985	Lef1	105.906	2.36012	0.331964	7.10958	1.16398e-12	5.29966e-11
ENSMUSG00000057729	Prtn3	215.344	1.72321	0.242438	7.10782	1.17887e-12	5.34376e-11
ENSMUSG00000054871	Tmem158	135.724	2.59958	0.36613	7.10015	1.24623e-12	5.63265e-11
ENSMUSG00000074733	5830428H23Rik	1142.97	0.654501	0.0921975	7.0989	1.25757e-12	5.66744e-11
ENSMUSG00000024074	Crim1	476.141	1.18485	0.16729	7.08262	1.41449e-12	6.35623e-11
ENSMUSG00000034160	Ogt	3185.06	0.499912	0.0705954	7.08137	1.42733e-12	6.3954e-11
ENSMUSG00000068735	Trp53i11	968.016	0.827974	0.117079	7.07192	1.52806e-12	6.8271e-11
ENSMUSG00000040990	Sh3kbp1	1653.89	0.616033	0.0873495	7.05251	1.75717e-12	7.82823e-11
ENSMUSG00000049517	Rps23	5880.6	-0.641591	0.0910776	-7.04444	1.86207e-12	8.27186e-11
ENSMUSG00000024338	Psmb8	4611.44	0.426861	0.0606165	7.04201	1.89492e-12	8.39379e-11
ENSMUSG00000031328	Flna	1186.53	-0.677081	0.0964611	-7.01921	2.23126e-12	9.7999e-11
ENSMUSG00000035539	E230008N13Rik	63.8972	-3.30268	0.470508	-7.01939	2.22845e-12	9.7999e-11
ENSMUSG00000027074	Slc43a3	344.476	-1.26587	0.180656	-7.0071	2.43317e-12	1.06566e-10
ENSMUSG00000046364	Rpl27a	6341.59	-0.542726	0.077465	-7.00608	2.45089e-12	1.07041e-10
ENSMUSG00000079555	Haus3	1394.29	0.616592	0.0881964	6.99112	2.72705e-12	1.18768e-10
ENSMUSG00000073702	Rpl31	10169	-0.444462	0.0635805	-6.99053	2.73846e-12	1.18932e-10
ENSMUSG00000027472	Pdrg1	2555.36	0.504675	0.0723261	6.97777	2.999e-12	1.29884e-10
ENSMUSG00000020267	Hint1	4031.4	-0.553869	0.0794571	-6.97067	3.15431e-12	1.36231e-10
ENSMUSG00000027423	Snx5	2288.87	-0.536947	0.0770511	-6.96871	3.19855e-12	1.37759e-10
ENSMUSG00000021457	Syk	330.153	-1.21686	0.174777	-6.96236	3.34615e-12	1.43718e-10
ENSMUSG00000004099	Dnmt1	1482.03	-0.611822	0.0879009	-6.96037	3.39384e-12	1.45365e-10
ENSMUSG00000080810	Gm11737	95.61	2.41513	0.347074	6.95854	3.43817e-12	1.46859e-10
ENSMUSG00000042351	Grap2	180.759	1.92802	0.277349	6.95161	3.61148e-12	1.53839e-10
ENSMUSG00000031762	Mt2	999.794	-0.932606	0.134177	-6.95056	3.63837e-12	1.54561e-10
ENSMUSG00000029291	Rufy3	936.563	0.905301	0.130294	6.94812	3.70197e-12	1.56408e-10
ENSMUSG00000044167	Foxo1	570.404	0.995093	0.143215	6.94823	3.69897e-12	1.56408e-10
ENSMUSG00000035569	Ankrd11	7460.45	0.434856	0.0626192	6.94444	3.79954e-12	1.60095e-10
ENSMUSG00000025428	Atp5a1	5312.44	-0.429199	0.0618146	-6.94333	3.82972e-12	1.60931e-10
ENSMUSG00000074607	Tox2	88.7878	2.33821	0.337061	6.93705	4.00372e-12	1.67789e-10
ENSMUSG00000032397	Tipin	976.814	-0.786794	0.113599	-6.92607	4.32692e-12	1.80847e-10
ENSMUSG00000031758	Cdyl2	832.036	0.793936	0.114766	6.91786	4.58509e-12	1.91123e-10
ENSMUSG00000041831	Sytl3	1022.63	0.687345	0.0997356	6.89167	5.5143e-12	2.29242e-10
ENSMUSG00000035042	Ccl5	831.233	-1.13293	0.164402	-6.8912	5.53233e-12	2.29378e-10
ENSMUSG00000018446	C1qbp	2106.7	-0.600579	0.0871653	-6.89012	5.57462e-12	2.30517e-10
ENSMUSG00000038301	Snx10	720.424	-0.859747	0.12487	-6.88512	5.77384e-12	2.38093e-10
ENSMUSG00000097194	9330175E14Rik	63.3469	2.72692	0.39608	6.88476	5.78847e-12	2.38093e-10
ENSMUSG00000030867	Plk1	499.083	-0.989324	0.143741	-6.88268	5.87351e-12	2.40954e-10
ENSMUSG00000032218	Ccnb2	566.802	-1.00015	0.145367	-6.88019	5.97727e-12	2.44565e-10
ENSMUSG00000059064	Gm10059	3920.7	-0.586599	0.0852747	-6.87894	6.03007e-12	2.46077e-10
ENSMUSG00000026526	Fh1	780.635	-0.778745	0.113224	-6.87791	6.0739e-12	2.47217e-10
ENSMUSG00000003746	Man1a	288.276	1.20202	0.175232	6.85957	6.90691e-12	2.80388e-10
ENSMUSG00000024399	Ltb	369.311	1.19715	0.174641	6.85493	7.13473e-12	2.88882e-10
ENSMUSG00000034892	Rps29	9775.12	-0.536923	0.0783532	-6.8526	7.25194e-12	2.92866e-10
ENSMUSG00000041859	Mcm3	2243.8	-0.604616	0.0884471	-6.83591	8.14884e-12	3.28234e-10
ENSMUSG00000039156	Stim2	1173.15	0.693434	0.101815	6.81075	9.70882e-12	3.90059e-10
ENSMUSG00000005057	Sh2b2	107.433	-2.34645	0.344752	-6.8062	1.00207e-11	4.01551e-10
ENSMUSG00000041390	Mdfic	389.648	1.07011	0.157302	6.80288	1.02549e-11	4.09881e-10
ENSMUSG00000040713	Creg1	1475.01	-0.597185	0.0878124	-6.80069	1.04116e-11	4.15075e-10
ENSMUSG00000026434	Nucks1	8464.07	-0.383152	0.0563913	-6.79453	1.08666e-11	4.32108e-10
ENSMUSG00000031827	Cotl1	796.739	-0.820195	0.12084	-6.78745	1.14134e-11	4.52694e-10
ENSMUSG00000028717	Tal1	177.221	-1.55347	0.22891	-6.78638	1.14986e-11	4.54911e-10
ENSMUSG00000079435	Rpl36a	17033.1	-0.398057	0.0586595	-6.78589	1.15374e-11	4.55288e-10
ENSMUSG00000024456	Diap1	4696.57	0.43793	0.0645625	6.78304	1.17671e-11	4.63179e-10
ENSMUSG00000026131	Dst	507.824	0.883796	0.130451	6.7749	1.24491e-11	4.88784e-10
ENSMUSG00000026815	Gfi1b	77.63	-2.82309	0.416952	-6.77079	1.28084e-11	5.01623e-10
ENSMUSG00000037300	Ttc13	766.281	0.790669	0.117029	6.7562	1.41654e-11	5.51988e-10
ENSMUSG00000099757	BE692007	276.763	1.29952	0.192337	6.75648	1.41386e-11	5.51988e-10
ENSMUSG00000074604	Mgst2	1356.68	0.80806	0.119751	6.74783	1.50068e-11	5.83313e-10
ENSMUSG00000076749	Tcrg-C1	8738.85	0.424499	0.0629902	6.73912	1.5935e-11	6.1785e-10
ENSMUSG00000030924	2610020H08Rik	1099.47	0.681584	0.101155	6.738	1.60579e-11	6.21064e-10
ENSMUSG00000092274	Neat1	4328.15	0.459068	0.068279	6.72342	1.77509e-11	6.8484e-10
ENSMUSG00000034024	Cct2	3172.92	-0.50813	0.0755954	-6.7217	1.79619e-11	6.90007e-10
ENSMUSG00000051748	Wfdc21	52.6927	3.392	0.504642	6.7216	1.79736e-11	6.90007e-10
ENSMUSG00000074578	1500012F01Rik	2268.82	-0.556654	0.0828239	-6.72093	1.80568e-11	6.91494e-10
ENSMUSG00000030978	Rrm1	1313.65	-0.615446	0.0915807	-6.72026	1.81402e-11	6.92983e-10
ENSMUSG00000030432	Rpl28	4628.18	-0.575721	0.0857923	-6.71063	1.93785e-11	7.38472e-10
ENSMUSG00000050921	P2ry10	1581.48	0.73228	0.109301	6.69966	2.08907e-11	7.94154e-10
ENSMUSG00000032202	Rab27a	1567.15	0.79768	0.119137	6.69547	2.14982e-11	8.15255e-10
ENSMUSG00000012405	Rpl15	861.94	-0.773868	0.115701	-6.68852	2.25442e-11	8.52839e-10
ENSMUSG00000029267	Mtf2	3451.38	0.483329	0.0723232	6.6829	2.34256e-11	8.84032e-10
ENSMUSG00000040447	Spns2	110.112	-2.03371	0.304459	-6.67976	2.3934e-11	9.0103e-10
ENSMUSG00000024197	Plin3	1332.78	0.665276	0.0996282	6.67759	2.42908e-11	9.12255e-10
ENSMUSG00000059878	Zfp422	1212.16	-0.700974	0.104994	-6.67633	2.45004e-11	9.17911e-10
ENSMUSG00000019841	Rev3l	947.333	0.726594	0.108914	6.67126	2.53615e-11	9.47888e-10
ENSMUSG00000022469	Rapgef3	661.85	0.99923	0.149819	6.66959	2.56512e-11	9.56414e-10
ENSMUSG00000020297	Nsg2	374.775	1.55431	0.23326	6.66343	2.67503e-11	9.95008e-10
ENSMUSG00000029455	Aldh2	1673.67	-0.668123	0.100357	-6.65745	2.78625e-11	1.03391e-09
ENSMUSG00000026480	Ncf2	304.733	-1.17115	0.175982	-6.65493	2.83439e-11	1.04926e-09
ENSMUSG00000051695	Pcbp1	3323.08	-0.557832	0.0840607	-6.63607	3.22159e-11	1.18977e-09
ENSMUSG00000039316	Rftn1	335.996	1.08017	0.1629	6.63085	3.33756e-11	1.22968e-09
ENSMUSG00000020330	Hmmr	489.572	-1.12582	0.169826	-6.62925	3.37391e-11	1.24013e-09
ENSMUSG00000031320	Rps4x	2740.42	-0.576852	0.0870307	-6.62814	3.39941e-11	1.24656e-09
ENSMUSG00000058558	Rpl5	13754.5	-0.475339	0.0717784	-6.62231	3.53627e-11	1.29369e-09
ENSMUSG00000006169	Clint1	2265.78	0.505821	0.0764439	6.61689	3.6684e-11	1.33888e-09
ENSMUSG00000061119	Prcp	111.36	-1.81364	0.274358	-6.61048	3.83089e-11	1.39491e-09
ENSMUSG00000029298	Gbp9	395.489	1.1406	0.172738	6.60307	4.02734e-11	1.46081e-09
ENSMUSG00000051335	Gfod1	465.88	-1.00286	0.151881	-6.60295	4.03066e-11	1.46081e-09
ENSMUSG00000037266	Rsrp1	11695.4	0.413304	0.0626445	6.59762	4.17821e-11	1.51076e-09
ENSMUSG00000031397	Tktl1	45.9167	3.84844	0.583432	6.59621	4.21808e-11	1.52164e-09
ENSMUSG00000022698	Naa50	1190.75	-0.622377	0.0944783	-6.58752	4.47243e-11	1.60966e-09
ENSMUSG00000029447	Cct6a	2616.31	-0.536921	0.0815399	-6.58476	4.55626e-11	1.63605e-09
ENSMUSG00000015217	Hmgb3	1082.45	-0.85393	0.129763	-6.5807	4.68241e-11	1.67747e-09
ENSMUSG00000024277	Mapre2	371.82	-1.06513	0.162048	-6.57289	4.93468e-11	1.76378e-09
ENSMUSG00000036305	Rpl39-ps	7163.9	-0.492964	0.0751159	-6.56271	5.28368e-11	1.88419e-09
ENSMUSG00000043993	2900052L18Rik	246.476	1.24708	0.190271	6.55426	5.59199e-11	1.98957e-09
ENSMUSG00000021996	Esd	1185.75	-0.639702	0.0976522	-6.55081	5.72246e-11	2.03134e-09
ENSMUSG00000043279	Trim56	1622.34	0.572427	0.087484	6.54323	6.02053e-11	2.13228e-09
ENSMUSG00000083878	Gm12034	1104.57	-0.701534	0.107313	-6.53726	6.2657e-11	2.21407e-09
ENSMUSG00000062647	Rpl7a	3617.72	-0.628189	0.0961046	-6.53652	6.29682e-11	2.22002e-09
ENSMUSG00000027533	Fabp5	272.091	-1.16255	0.177972	-6.53224	6.4794e-11	2.27923e-09
ENSMUSG00000024222	Fkbp5	2837.96	0.609083	0.093277	6.52983	6.5843e-11	2.3109e-09
ENSMUSG00000023951	Vegfa	685.605	0.876251	0.134217	6.5286	6.63852e-11	2.31945e-09
ENSMUSG00000043716	Rpl7	5421.15	-0.38564	0.0590671	-6.52886	6.62742e-11	2.31945e-09
ENSMUSG00000086291	Gm15513	75.9054	2.56334	0.392862	6.5248	6.80946e-11	2.37384e-09
ENSMUSG00000037475	Thoc2	6619.18	0.381572	0.0585575	6.5162	7.21125e-11	2.50829e-09
ENSMUSG00000061330	Gm11361	7571.49	-0.391843	0.0601527	-6.51413	7.31126e-11	2.5374e-09
ENSMUSG00000027108	Ola1	1353.82	-0.588974	0.0905106	-6.50724	7.65449e-11	2.6506e-09
ENSMUSG00000037860	Aim2	607.479	0.825371	0.127218	6.48784	8.7074e-11	3.0085e-09
ENSMUSG00000059657	Stfa2l1	38.2416	6.29826	0.971635	6.48213	9.0436e-11	3.11774e-09
ENSMUSG00000022108	Itm2b	6695.11	0.519125	0.0802491	6.46892	9.87067e-11	3.39533e-09
ENSMUSG00000054717	Hmgb2	2334.19	-0.554821	0.085853	-6.46245	1.03021e-10	3.53592e-09
ENSMUSG00000005410	Mcm5	920.479	-0.843589	0.130571	-6.46078	1.04167e-10	3.56736e-09
ENSMUSG00000045679	Pqlc3	622.895	0.981196	0.15214	6.44929	1.12372e-10	3.83991e-09
ENSMUSG00000033952	Aspm	796.516	-0.749177	0.11624	-6.4451	1.15528e-10	3.93909e-09
ENSMUSG00000058794	Nfe2	912.267	-0.685649	0.106511	-6.43735	1.21575e-10	4.13622e-09
ENSMUSG00000024640	Psat1	740.925	-0.914851	0.142348	-6.42685	1.30276e-10	4.42256e-09
ENSMUSG00000021270	Hsp90aa1	4394.6	-0.481184	0.0750357	-6.41273	1.42937e-10	4.84178e-09
ENSMUSG00000090862	Rps13	10335.8	-0.379568	0.0592648	-6.40462	1.50746e-10	5.09521e-09
ENSMUSG00000040018	Cox15	434.421	-0.933452	0.145875	-6.39898	1.56418e-10	5.27547e-09
ENSMUSG00000073676	Hspe1	2273.93	-0.699481	0.109521	-6.38675	1.69451e-10	5.70265e-09
ENSMUSG00000026701	Prdx6	2294.48	-0.463908	0.0726507	-6.38545	1.70892e-10	5.73873e-09
ENSMUSG00000030144	Clec4d	380.305	-1.0011	0.156801	-6.38455	1.71907e-10	5.76037e-09
ENSMUSG00000062867	Impdh2	985.178	-0.666818	0.104449	-6.38413	1.7237e-10	5.76347e-09
ENSMUSG00000034028	Cd226	38.0707	3.61513	0.566615	6.38023	1.7682e-10	5.89957e-09
ENSMUSG00000030156	Cd69	186.297	-1.79444	0.281358	-6.37778	1.79676e-10	5.98202e-09
ENSMUSG00000105601	RP23-477N9.3	107.895	1.9355	0.303666	6.37378	1.84424e-10	6.12698e-09
ENSMUSG00000020590	Snx13	364.299	1.03471	0.16273	6.35845	2.03798e-10	6.73567e-09
ENSMUSG00000032750	Gab3	667.681	0.768337	0.120835	6.35858	2.03625e-10	6.73567e-09
ENSMUSG00000048490	Nrip1	3353.4	0.53159	0.0836061	6.35826	2.04045e-10	6.73567e-09
ENSMUSG00000045273	Cenph	595.854	-0.942718	0.14846	-6.34997	2.1536e-10	7.09412e-09
ENSMUSG00000017132	Cyth1	353.402	1.28566	0.202523	6.34823	2.1781e-10	7.15964e-09
ENSMUSG00000033192	Lpcat2	319.275	-1.26785	0.199919	-6.34179	2.27115e-10	7.44975e-09
ENSMUSG00000054905	Stfa3	41.5802	7.04411	1.11348	6.32623	2.5123e-10	8.22341e-09
ENSMUSG00000041849	Card6	172.189	1.56169	0.247293	6.31513	2.69937e-10	8.81718e-09
ENSMUSG00000029833	Trim24	811.669	0.725418	0.114998	6.30809	2.825e-10	9.20819e-09
ENSMUSG00000093674	Rpl41	2510.19	-0.6654	0.105548	-6.30425	2.89599e-10	9.41985e-09
ENSMUSG00000059751	Rps3a3	2797.58	-0.551743	0.0875615	-6.30121	2.95336e-10	9.58639e-09
ENSMUSG00000026721	Rabgap1l	4644.3	0.401914	0.0637925	6.30034	2.96995e-10	9.62017e-09
ENSMUSG00000029552	Tes	1782.43	-0.573776	0.0910857	-6.2993	2.99002e-10	9.66503e-09
ENSMUSG00000062997	Rpl35	2072.7	-0.573469	0.09116	-6.29079	3.15848e-10	1.01884e-08
ENSMUSG00000060143	Gm10076	7690.5	-0.444331	0.0707023	-6.28454	3.28825e-10	1.0585e-08
ENSMUSG00000060636	Rpl35a	6779.42	-0.444963	0.0708644	-6.27908	3.40589e-10	1.09411e-08
ENSMUSG00000015656	Hspa8	4623.67	-0.472796	0.0753064	-6.27829	3.42309e-10	1.09736e-08
ENSMUSG00000089764	Gm16580	1119.47	-0.646065	0.102997	-6.27267	3.54919e-10	1.13545e-08
ENSMUSG00000031539	Ap3m2	300.103	1.03156	0.164663	6.26469	3.73564e-10	1.19264e-08
ENSMUSG00000028081	Rps3a1	3894.91	-0.553207	0.0883341	-6.26266	3.78456e-10	1.20579e-08
ENSMUSG00000004207	Psap	1454.16	0.571501	0.0912612	6.26225	3.79454e-10	1.20649e-08
ENSMUSG00000034007	Scaper	803.228	0.675062	0.107805	6.2619	3.80324e-10	1.20679e-08
ENSMUSG00000055322	Tns1	230.318	-1.37919	0.220302	-6.26049	3.83778e-10	1.21527e-08
ENSMUSG00000006442	Srm	491.923	-0.941294	0.150564	-6.25178	4.05793e-10	1.28237e-08
ENSMUSG00000054387	Mdm4	2436.26	0.454098	0.0726726	6.24855	4.1429e-10	1.30657e-08
ENSMUSG00000034647	Ankrd12	5521.24	0.5081	0.0813901	6.24278	4.29874e-10	1.35297e-08
ENSMUSG00000040242	Fgfr1op2	3557.95	0.414679	0.0664381	6.24159	4.33157e-10	1.3584e-08
ENSMUSG00000063646	Jakmip1	933.386	0.70045	0.112224	6.24152	4.33346e-10	1.3584e-08
ENSMUSG00000054792	Klhl18	581.735	-0.833398	0.133632	-6.23649	4.47487e-10	1.39991e-08
ENSMUSG00000024513	Mbd2	1653.57	0.612099	0.0982934	6.22727	4.74626e-10	1.48182e-08
ENSMUSG00000007892	Rplp1	9311.13	-0.53092	0.0853457	-6.22082	4.94564e-10	1.54098e-08
ENSMUSG00000042613	Pbxip1	2346.72	0.562184	0.0903868	6.21975	4.97932e-10	1.54837e-08
ENSMUSG00000034330	Plcg2	1048.31	-0.667689	0.107439	-6.21461	5.14531e-10	1.59679e-08
ENSMUSG00000075266	Cenpw	494.953	-1.01333	0.163222	-6.2083	5.35612e-10	1.6589e-08
ENSMUSG00000104713	Gbp6	126.999	1.84131	0.297039	6.19889	5.68643e-10	1.75771e-08
ENSMUSG00000021495	Fam193b	1825.18	0.551439	0.0890391	6.19322	5.89488e-10	1.81611e-08
ENSMUSG00000107012	RP23-353E8.7	140.335	1.85156	0.298971	6.19311	5.89875e-10	1.81611e-08
ENSMUSG00000042462	Dctpp1	495.36	-0.996738	0.161204	-6.18307	6.28662e-10	1.93171e-08
ENSMUSG00000022999	Lmbr1l	358.369	0.973372	0.157453	6.18197	6.33065e-10	1.9414e-08
ENSMUSG00000106499	RP23-447N11.3	1180	-0.692981	0.112118	-6.1808	6.37767e-10	1.95197e-08
ENSMUSG00000029705	Cux1	5592.2	0.404918	0.0655856	6.17389	6.66308e-10	2.03532e-08
ENSMUSG00000053580	Tanc2	391.398	1.06546	0.172611	6.17259	6.71821e-10	2.04813e-08
ENSMUSG00000058470	Gm8369	105.313	1.79596	0.291262	6.16613	6.99831e-10	2.12935e-08
ENSMUSG00000025432	Avil	39.7677	4.40983	0.715645	6.16203	7.18164e-10	2.18086e-08
ENSMUSG00000036622	Atp13a2	516.29	-0.813395	0.132122	-6.15641	7.44127e-10	2.2553e-08
ENSMUSG00000020077	Srgn	5994.72	-0.380312	0.0618019	-6.15372	7.56862e-10	2.28943e-08
ENSMUSG00000071562	Stfa1	213.609	4.34741	0.706634	6.15228	7.63791e-10	2.30591e-08
ENSMUSG00000027715	Ccna2	378.578	-1.02333	0.166459	-6.14762	7.86537e-10	2.36998e-08
ENSMUSG00000094344	Gm11942	15909.9	-0.309885	0.0504141	-6.14678	7.90692e-10	2.37789e-08
ENSMUSG00000036362	P2ry13	50.4595	-3.44329	0.560438	-6.14393	8.05035e-10	2.41635e-08
ENSMUSG00000024097	Srsf7	2421.27	-0.455187	0.0740937	-6.1434	8.07721e-10	2.41974e-08
ENSMUSG00000086236	5830418P13Rik	1743.16	0.746292	0.121574	6.13858	8.3265e-10	2.48962e-08
ENSMUSG00000025613	Cct8	2749	-0.414477	0.0675751	-6.13358	8.59251e-10	2.56423e-08
ENSMUSG00000078853	Igtp	852.576	0.679449	0.11084	6.12999	8.78868e-10	2.61775e-08
ENSMUSG00000028495	Rps6	852.907	-0.739065	0.120673	-6.12455	9.09425e-10	2.70358e-08
ENSMUSG00000021109	Hif1a	1010.36	0.770041	0.125747	6.12373	9.14115e-10	2.71234e-08
ENSMUSG00000026158	Ogfrl1	447.108	-0.92262	0.150715	-6.12162	9.26272e-10	2.74318e-08
ENSMUSG00000027858	Tspan2	2479.71	0.60528	0.0989056	6.11978	9.37068e-10	2.76987e-08
ENSMUSG00000032092	Mpzl2	567.18	1.2026	0.196553	6.11847	9.44787e-10	2.78739e-08
ENSMUSG00000026573	Xcl1	55.16	2.7322	0.4466	6.11777	9.48934e-10	2.79203e-08
ENSMUSG00000034614	Pik3ip1	2405.45	0.501784	0.0820231	6.1176	9.49952e-10	2.79203e-08
ENSMUSG00000032410	Xrn1	2475.23	0.433592	0.0709173	6.11405	9.71328e-10	2.84947e-08
ENSMUSG00000006678	Pola1	797.213	-0.68735	0.112447	-6.11263	9.79999e-10	2.8695e-08
ENSMUSG00000007739	Cct4	2315.02	-0.55632	0.0910833	-6.10781	1.01008e-09	2.95203e-08
ENSMUSG00000027306	Nusap1	1219.44	-0.589485	0.0965671	-6.1044	1.03185e-09	3.00997e-08
ENSMUSG00000021213	Akr1c13	3282.5	-0.46234	0.0757648	-6.1023	1.04551e-09	3.04412e-08
ENSMUSG00000002578	Ikzf4	573.902	0.783978	0.128554	6.09844	1.07106e-09	3.11268e-08
ENSMUSG00000047230	Cldn2	67.2768	-2.39812	0.393257	-6.09811	1.07328e-09	3.11331e-08
ENSMUSG00000063457	Rps15	7390.39	-0.409851	0.0672191	-6.09724	1.07912e-09	3.12443e-08
ENSMUSG00000024298	Zfp871	1203.78	0.665296	0.10913	6.09638	1.08497e-09	3.13551e-08
ENSMUSG00000028873	Cdca8	707.157	-0.748464	0.122953	-6.08741	1.14755e-09	3.31024e-08
ENSMUSG00000051978	Erich1	450.993	0.851892	0.139972	6.08614	1.15666e-09	3.33033e-08
ENSMUSG00000043858	Nup62	1107	-0.58516	0.096264	-6.07871	1.21156e-09	3.48194e-08
ENSMUSG00000030220	Arhgdib	2665.03	-0.426428	0.0701919	-6.07517	1.23859e-09	3.55305e-08
ENSMUSG00000091996	BC049352	287.37	1.33184	0.219284	6.07358	1.25087e-09	3.58169e-08
ENSMUSG00000002055	Spag5	286.445	-1.1133	0.183972	-6.05143	1.43567e-09	4.10328e-08
ENSMUSG00000041997	Tlk1	830.084	0.649975	0.107507	6.04591	1.48569e-09	4.23845e-08
ENSMUSG00000017756	Slc12a7	861.806	0.720114	0.119119	6.04532	1.49115e-09	4.24622e-08
ENSMUSG00000006333	Rps9	25439.6	-0.33797	0.0559306	-6.04267	1.51587e-09	4.30872e-08
ENSMUSG00000033355	Rtp4	382.438	0.949205	0.157267	6.03561	1.58359e-09	4.493e-08
ENSMUSG00000006304	Arpc2	7744.75	-0.330216	0.0547271	-6.03387	1.60082e-09	4.53363e-08
ENSMUSG00000021427	Ssr1	2050.84	-0.465238	0.0773658	-6.01348	1.81577e-09	5.13301e-08
ENSMUSG00000027763	Mbnl1	8336.83	0.356683	0.0593189	6.01297	1.82154e-09	5.13998e-08
ENSMUSG00000002718	Cse1l	931.641	-0.639655	0.106452	-6.00886	1.86835e-09	5.26252e-08
ENSMUSG00000041966	Dcaf17	1078.64	0.591986	0.0986157	6.00296	1.93755e-09	5.44757e-08
ENSMUSG00000040732	Erg	779.571	-0.729485	0.121735	-5.9924	2.06763e-09	5.80279e-08
ENSMUSG00000103089	Gm38118	122.485	1.62917	0.272065	5.98818	2.122e-09	5.94465e-08
ENSMUSG00000025364	Pa2g4	3935.92	-0.396582	0.0662334	-5.98764	2.1291e-09	5.94984e-08
ENSMUSG00000038039	Gcc2	1668.23	0.559718	0.0934819	5.98745	2.1315e-09	5.94984e-08
ENSMUSG00000038121	Fam210a	1776.27	0.480608	0.0802895	5.98594	2.1515e-09	5.9949e-08
ENSMUSG00000018189	Uchl5	1054.26	-0.629232	0.105193	-5.98172	2.208e-09	6.14131e-08
ENSMUSG00000025014	Dntt	957.092	1.65529	0.276841	5.97922	2.24209e-09	6.225e-08
ENSMUSG00000024014	Pim1	7034.5	-0.441491	0.0739185	-5.97267	2.33405e-09	6.46877e-08
ENSMUSG00000014195	Dnajc7	1457.96	0.723875	0.121219	5.97164	2.34877e-09	6.49798e-08
ENSMUSG00000027381	Bcl2l11	1602.83	0.519987	0.0871237	5.96838	2.39615e-09	6.61729e-08
ENSMUSG00000024177	Nme4	520.393	-0.954456	0.159949	-5.96726	2.41271e-09	6.6512e-08
ENSMUSG00000021998	Lcp1	5716.73	-0.34167	0.0572695	-5.966	2.43137e-09	6.6873e-08
ENSMUSG00000037474	Dtl	970.904	-0.688093	0.11534	-5.9658	2.4344e-09	6.6873e-08
ENSMUSG00000034786	Gpsm3	734.545	0.660419	0.110778	5.96164	2.49711e-09	6.83541e-08
ENSMUSG00000039630	Hnrnpu	4016.62	-0.412432	0.0691785	-5.96185	2.49405e-09	6.83541e-08
ENSMUSG00000073002	Vamp5	565.527	-0.883593	0.148457	-5.95185	2.65124e-09	7.24454e-08
ENSMUSG00000076754	Trgv2	1169.83	0.847523	0.142436	5.95018	2.67849e-09	7.30617e-08
ENSMUSG00000030200	Bcl2l14	262.099	-1.14036	0.192024	-5.93862	2.87428e-09	7.82649e-08
ENSMUSG00000020897	Aurkb	242.381	-1.21487	0.204639	-5.93664	2.90924e-09	7.90785e-08
ENSMUSG00000052949	Rnf157	809.84	0.643136	0.108366	5.93488	2.94062e-09	7.97919e-08
ENSMUSG00000030559	Rab38	350.386	-0.931801	0.157083	-5.93189	2.99475e-09	8.11192e-08
ENSMUSG00000026994	Galnt3	132.88	1.51927	0.256362	5.92626	3.0991e-09	8.37998e-08
ENSMUSG00000032870	Smap2	1538.11	0.486263	0.0821793	5.91709	3.27677e-09	8.84502e-08
ENSMUSG00000057863	Rpl36	4895.32	-0.441688	0.0746743	-5.91485	3.32168e-09	8.93522e-08
ENSMUSG00000071415	Rpl23	16368.2	-0.359578	0.0607915	-5.91494	3.32003e-09	8.93522e-08
ENSMUSG00000040481	Bptf	6999.2	0.348405	0.0589299	5.9122	3.37574e-09	9.06494e-08
ENSMUSG00000026319	2310035C23Rik	1168.68	0.677679	0.114633	5.91174	3.38502e-09	9.06594e-08
ENSMUSG00000036172	Cd200r3	22.359	7.9925	1.352	5.91161	3.38778e-09	9.06594e-08
ENSMUSG00000028248	Pnisr	10780.7	0.344171	0.0582317	5.91036	3.41359e-09	9.11932e-08
ENSMUSG00000026822	Lcn2	32.9832	4.09726	0.693401	5.90894	3.44325e-09	9.1828e-08
ENSMUSG00000034994	Eef2	17719.6	-0.292026	0.0494486	-5.90565	3.5126e-09	9.3517e-08
ENSMUSG00000028339	Col15a1	125.731	1.65829	0.280953	5.90236	3.58337e-09	9.52381e-08
ENSMUSG00000052997	Uba2	724.566	-0.661024	0.112016	-5.90118	3.609e-09	9.57556e-08
ENSMUSG00000002297	Dbf4	1057.97	-0.581269	0.0986066	-5.89483	3.75074e-09	9.93468e-08
ENSMUSG00000064065	Ipcef1	1107.45	0.571407	0.0969471	5.89401	3.76933e-09	9.96694e-08
ENSMUSG00000025508	Rplp2	17205.4	-0.323279	0.0548901	-5.88957	3.87195e-09	1.02209e-07
ENSMUSG00000004897	Hdgf	5088.59	-0.374888	0.0637427	-5.88127	4.0712e-09	1.07287e-07
ENSMUSG00000024921	Smarca2	1881.97	0.527023	0.0897331	5.87324	4.27369e-09	1.12432e-07
ENSMUSG00000042851	Zc3h6	679.382	0.72751	0.124107	5.86196	4.57447e-09	1.20142e-07
ENSMUSG00000028936	Rpl22	11040.1	-0.360247	0.06148	-5.85958	4.64049e-09	1.2167e-07
ENSMUSG00000003031	Cdkn1b	2060.38	0.541523	0.0924543	5.85719	4.7076e-09	1.23222e-07
ENSMUSG00000021250	Fos	66.628	-2.17181	0.370832	-5.85658	4.7249e-09	1.23467e-07
ENSMUSG00000040731	Eif4h	2291.4	-0.435918	0.0745525	-5.84713	5.00141e-09	1.30473e-07
ENSMUSG00000021065	Fut8	2593.12	-0.431548	0.0738255	-5.84551	5.05026e-09	1.31527e-07
ENSMUSG00000034480	Diap2	1880.9	0.528728	0.0905032	5.84209	5.15504e-09	1.34031e-07
ENSMUSG00000022033	Pbk	335.149	-0.979787	0.167815	-5.83851	5.26711e-09	1.36716e-07
ENSMUSG00000059070	Rpl18	7105.25	-0.425116	0.0728209	-5.83782	5.28868e-09	1.37047e-07
ENSMUSG00000104369	Gm38082	620.06	0.823542	0.141079	5.83746	5.3003e-09	1.3712e-07
ENSMUSG00000104960	Snhg8	1985.62	-0.516771	0.0885899	-5.8333	5.43423e-09	1.40351e-07
ENSMUSG00000041220	Elovl6	1513.77	0.524014	0.0898551	5.83177	5.48437e-09	1.41411e-07
ENSMUSG00000025241	Fyco1	358.543	0.988792	0.169826	5.82238	5.80137e-09	1.49337e-07
ENSMUSG00000020453	Patz1	2052.61	0.49074	0.0843511	5.81783	5.96175e-09	1.53212e-07
ENSMUSG00000032666	1700025G04Rik	724.144	-0.841586	0.144705	-5.81586	6.03243e-09	1.54773e-07
ENSMUSG00000032484	Ngp	419.063	6.84433	1.17695	5.8153	6.05262e-09	1.55035e-07
ENSMUSG00000018583	G3bp1	4571.31	-0.413606	0.0711932	-5.80964	6.26091e-09	1.60106e-07
ENSMUSG00000021892	Sh3bp5	1498.04	0.521208	0.0897619	5.80656	6.37699e-09	1.62807e-07
ENSMUSG00000005615	Pcyt1a	496.458	-0.914477	0.157693	-5.7991	6.66699e-09	1.69932e-07
ENSMUSG00000005846	Rsl1d1	2681.76	-0.406868	0.0701818	-5.79735	6.73704e-09	1.71436e-07
ENSMUSG00000058064	Gm10036	4329.17	-0.438424	0.0758319	-5.78153	7.4026e-09	1.88065e-07
ENSMUSG00000035181	Heatr5a	307.28	-1.08333	0.187472	-5.77861	7.53211e-09	1.91043e-07
ENSMUSG00000036155	Mgat5	1718.41	-0.522468	0.090495	-5.77345	7.76666e-09	1.96671e-07
ENSMUSG00000064109	Hcst	631.378	0.784801	0.136002	5.77051	7.90308e-09	1.998e-07
ENSMUSG00000050592	Fam78a	563.112	0.800471	0.138737	5.76968	7.9422e-09	2.00463e-07
ENSMUSG00000052821	Cysltr1	473.408	1.22848	0.212942	5.76908	7.97044e-09	2.0085e-07
ENSMUSG00000004264	Phb2	1958.16	-0.45892	0.0795943	-5.76575	8.12968e-09	2.04531e-07
ENSMUSG00000025647	Shisa5	3073.69	0.429403	0.0745231	5.76202	8.31152e-09	2.08768e-07
ENSMUSG00000026069	Il1rl1	34.5981	3.76958	0.65485	5.7564	8.59276e-09	2.15484e-07
ENSMUSG00000032549	Rab6b	408.382	0.925265	0.160756	5.7557	8.62851e-09	2.16032e-07
ENSMUSG00000025921	Rdh10	597.595	0.98108	0.170813	5.74359	9.26897e-09	2.31694e-07
ENSMUSG00000031097	Tnni2	43.9829	-2.79405	0.48656	-5.74246	9.33084e-09	2.32522e-07
ENSMUSG00000060550	H2-Q7	851.935	0.704465	0.122677	5.74244	9.33198e-09	2.32522e-07
ENSMUSG00000026600	Soat1	621.618	0.74441	0.129738	5.73778	9.59243e-09	2.38629e-07
ENSMUSG00000022346	Myc	529.828	-0.929281	0.161978	-5.73707	9.63278e-09	2.3925e-07
ENSMUSG00000048578	Mlec	1900.81	-0.432503	0.0754735	-5.73053	1.00118e-08	2.48267e-07
ENSMUSG00000029407	Uso1	1599.14	0.556941	0.0973114	5.72329	1.0448e-08	2.58672e-07
ENSMUSG00000085434	Gm11725	78.9999	1.97035	0.344342	5.72208	1.05229e-08	2.60111e-07
ENSMUSG00000061477	Rps7	5463.41	-0.401625	0.0702454	-5.71745	1.08133e-08	2.66865e-07
ENSMUSG00000076870	Trdj1	171.443	1.30095	0.227616	5.71554	1.09359e-08	2.69463e-07
ENSMUSG00000104699	Rps4x-ps	1993.19	-0.576033	0.100792	-5.71508	1.09652e-08	2.69759e-07
ENSMUSG00000041890	Git2	2577.4	0.474974	0.083113	5.7148	1.09836e-08	2.69783e-07
ENSMUSG00000025240	Sacm1l	661.541	0.782109	0.136887	5.71352	1.10663e-08	2.71385e-07
ENSMUSG00000037922	Bank1	26.5212	3.96767	0.694773	5.71075	1.12482e-08	2.75413e-07
ENSMUSG00000076490	Trbc1	19072.5	0.30976	0.0542599	5.70882	1.13763e-08	2.7811e-07
ENSMUSG00000008682	Rpl10	5451.88	-0.362328	0.0635234	-5.70386	1.17127e-08	2.85887e-07
ENSMUSG00000035649	Zcchc7	2602.65	0.456208	0.0800477	5.6992	1.20369e-08	2.93337e-07
ENSMUSG00000030774	Pak1	104.433	-1.8696	0.32811	-5.69808	1.21162e-08	2.94348e-07
ENSMUSG00000081769	Gm12216	449.35	0.936441	0.164338	5.69825	1.21044e-08	2.94348e-07
ENSMUSG00000028053	Ash1l	2732.68	0.405689	0.0712069	5.69733	1.21697e-08	2.95186e-07
ENSMUSG00000030789	Itgax	158.284	-1.62473	0.285689	-5.68705	1.29252e-08	3.13023e-07
ENSMUSG00000015501	Hivep2	772.452	0.759009	0.133564	5.68274	1.32557e-08	3.2003e-07
ENSMUSG00000037725	Ckap2	205.414	-1.31046	0.230602	-5.6828	1.32509e-08	3.2003e-07
ENSMUSG00000027326	Casc5	778.759	-0.653585	0.115084	-5.67921	1.35315e-08	3.26182e-07
ENSMUSG00000026803	Ttf1	959.139	0.659368	0.116125	5.67808	1.36215e-08	3.27843e-07
ENSMUSG00000036371	Serbp1	19289	-0.304346	0.0536417	-5.67368	1.39766e-08	3.35869e-07
ENSMUSG00000067194	Eif1ax	1274.15	-0.531046	0.0938505	-5.65842	1.52771e-08	3.66557e-07
ENSMUSG00000021221	Dpf3	147.497	1.55665	0.275206	5.65631	1.54658e-08	3.69943e-07
ENSMUSG00000029616	Erp29	951.387	-0.586057	0.103611	-5.65633	1.54646e-08	3.69943e-07
ENSMUSG00000032344	Mb21d1	187.129	-1.21187	0.214564	-5.64807	1.62259e-08	3.87011e-07
ENSMUSG00000086266	Igf2os	383.38	1.04737	0.18544	5.64804	1.62292e-08	3.87011e-07
ENSMUSG00000012443	Kif11	424.852	-0.883851	0.156521	-5.64684	1.63425e-08	3.89118e-07
ENSMUSG00000097636	5830416P10Rik	1183.42	0.678628	0.120185	5.64654	1.6371e-08	3.892e-07
ENSMUSG00000026914	Psmd14	1600.5	-0.508841	0.0902162	-5.64024	1.69816e-08	4.03098e-07
ENSMUSG00000057278	Snrpg	3456.2	-0.467828	0.0830124	-5.63565	1.74403e-08	4.13356e-07
ENSMUSG00000022450	Ndufa6	3049.57	-0.385919	0.0684956	-5.63422	1.75854e-08	4.16161e-07
ENSMUSG00000031432	Prps1	533.931	-0.796719	0.14145	-5.6325	1.77615e-08	4.1969e-07
ENSMUSG00000029621	Arpc1a	1106.2	-0.56303	0.0999684	-5.63208	1.78047e-08	4.20071e-07
ENSMUSG00000003812	Dnase2a	358.722	-1.02663	0.1823	-5.63154	1.78609e-08	4.20759e-07
ENSMUSG00000026009	Icos	106.055	1.61874	0.287601	5.62845	1.81841e-08	4.27726e-07
ENSMUSG00000022604	Cep97	1049.52	0.604382	0.107421	5.62628	1.84138e-08	4.32475e-07
ENSMUSG00000071172	Srsf3	4020.53	-0.418872	0.0745174	-5.62112	1.8972e-08	4.44913e-07
ENSMUSG00000023505	Cdca3	388.3	-0.86552	0.154018	-5.61961	1.91393e-08	4.4816e-07
ENSMUSG00000029468	P2rx7	438.844	0.975819	0.17374	5.61654	1.94824e-08	4.55506e-07
ENSMUSG00000027514	Zbp1	81.8425	2.28721	0.407644	5.6108	2.01394e-08	4.70161e-07
ENSMUSG00000028249	Sdcbp	3377.86	-0.404493	0.0721143	-5.60905	2.03438e-08	4.74221e-07
ENSMUSG00000093661	Eif4e3	852.713	0.625165	0.111546	5.60457	2.0877e-08	4.85922e-07
ENSMUSG00000014353	Tmem87b	474.154	0.769141	0.137348	5.59993	2.14433e-08	4.98356e-07
ENSMUSG00000035247	Hectd1	6223.35	-0.339228	0.0606113	-5.59677	2.1838e-08	5.06773e-07
ENSMUSG00000024660	Incenp	805.446	-0.678693	0.121297	-5.59531	2.20226e-08	5.10294e-07
ENSMUSG00000038943	Prc1	664.737	-0.670307	0.119941	-5.58863	2.28864e-08	5.29521e-07
ENSMUSG00000021127	Zfp36l1	549.606	0.702636	0.125854	5.58294	2.36488e-08	5.46348e-07
ENSMUSG00000020649	Rrm2	674.757	-0.704377	0.126369	-5.57398	2.48989e-08	5.74374e-07
ENSMUSG00000105504	Gbp5	185.176	1.30693	0.234563	5.57177	2.52167e-08	5.80844e-07
ENSMUSG00000087201	Gm15261	104.482	-1.91612	0.344111	-5.5683	2.57235e-08	5.91641e-07
ENSMUSG00000007080	Pole	349.933	-0.910296	0.16372	-5.56006	2.69676e-08	6.17514e-07
ENSMUSG00000027367	Stard7	751.577	-0.677779	0.121894	-5.5604	2.69161e-08	6.17514e-07
ENSMUSG00000029484	Anxa3	26.6028	4.46896	0.803732	5.56025	2.69384e-08	6.17514e-07
ENSMUSG00000048327	Ckap2l	456.335	-0.836842	0.150713	-5.55256	2.81511e-08	6.43666e-07
ENSMUSG00000021556	Golm1	88.5705	-1.84807	0.333209	-5.54628	2.91816e-08	6.66248e-07
ENSMUSG00000104235	Gm37589	95.781	1.65999	0.299569	5.54127	3.00292e-08	6.84596e-07
ENSMUSG00000024190	Dusp1	130.087	-1.68393	0.30434	-5.53306	3.14701e-08	7.15346e-07
ENSMUSG00000030671	Pde3b	3968.98	0.371418	0.0671253	5.53321	3.14424e-08	7.15346e-07
ENSMUSG00000008450	Nutf2	426.915	-0.801396	0.144882	-5.53136	3.17749e-08	7.2122e-07
ENSMUSG00000042700	Sipa1l1	1970.52	0.60398	0.109259	5.52795	3.23994e-08	7.34324e-07
ENSMUSG00000106106	Rn18s-rs5	907.829	0.929389	0.168152	5.52709	3.25577e-08	7.36837e-07
ENSMUSG00000076911	Traj18	39.926	2.77923	0.5035	5.51983	3.39329e-08	7.66844e-07
ENSMUSG00000000001	Gnai3	1728.19	0.502966	0.0912499	5.51196	3.54854e-08	7.99604e-07
ENSMUSG00000047126	Cltc	3030.74	-0.416009	0.0754721	-5.5121	3.54586e-08	7.99604e-07
ENSMUSG00000041117	Ccdc8	352.519	-0.861594	0.156359	-5.51035	3.58129e-08	8.05816e-07
ENSMUSG00000026249	Serpine2	110.11	1.67185	0.303555	5.50758	3.63806e-08	8.17407e-07
ENSMUSG00000020423	Btg2	672.717	0.694245	0.126208	5.50081	3.78042e-08	8.48167e-07
ENSMUSG00000039987	Phtf2	260.101	-1.05016	0.190947	-5.49976	3.80312e-08	8.5203e-07
ENSMUSG00000058715	Fcer1g	355.328	-1.08989	0.198198	-5.49899	3.81967e-08	8.54507e-07
ENSMUSG00000057406	Whsc1	2864.53	0.435979	0.0793418	5.49495	3.90813e-08	8.73041e-07
ENSMUSG00000001482	Def8	499.583	-0.816985	0.148933	-5.48557	4.12129e-08	9.19337e-07
ENSMUSG00000032525	Nktr	4340.21	0.364757	0.0664977	5.48526	4.12868e-08	9.19667e-07
ENSMUSG00000091955	Gm9844	3028.75	0.439296	0.0801639	5.47998	4.25381e-08	9.46183e-07
ENSMUSG00000022141	Nipbl	5190.59	0.411104	0.0750303	5.47917	4.27328e-08	9.49157e-07
ENSMUSG00000000184	Ccnd2	10386.7	0.301984	0.0551802	5.47268	4.43278e-08	9.8318e-07
ENSMUSG00000039774	Galnt12	281.445	1.03711	0.189517	5.47241	4.43957e-08	9.83284e-07
ENSMUSG00000003992	Ssbp2	990.277	0.607652	0.111071	5.47084	4.47908e-08	9.90623e-07
ENSMUSG00000040865	Ino80d	1238.25	0.529211	0.0968145	5.46624	4.59688e-08	1.01523e-06
ENSMUSG00000028693	Nasp	1258.65	-0.504597	0.0924633	-5.45727	4.83511e-08	1.06633e-06
ENSMUSG00000029649	Pomp	4529.93	-0.37171	0.0681838	-5.45159	4.99228e-08	1.09943e-06
ENSMUSG00000034006	Pqlc1	355.293	-0.937764	0.172082	-5.44952	5.05064e-08	1.11071e-06
ENSMUSG00000034401	Spata6	448.779	0.808175	0.148333	5.44839	5.08265e-08	1.11617e-06
ENSMUSG00000035232	Pdk3	542.611	-0.775239	0.142406	-5.44387	5.21365e-08	1.14333e-06
ENSMUSG00000031756	Cenpn	143.058	-1.32752	0.243934	-5.44212	5.26496e-08	1.15218e-06
ENSMUSG00000036111	Lmo1	100.353	-1.59258	0.292646	-5.44199	5.26887e-08	1.15218e-06
ENSMUSG00000020402	Vdac1	2349.21	-0.45486	0.0836329	-5.43877	5.36507e-08	1.17157e-06
ENSMUSG00000048922	Cdca2	435.279	-0.764305	0.140591	-5.43636	5.43805e-08	1.18585e-06
ENSMUSG00000082896	Gm5844	1061.01	-0.584843	0.107634	-5.43361	5.52248e-08	1.20257e-06
ENSMUSG00000028173	Wls	2011.03	0.489294	0.0901255	5.42903	5.66624e-08	1.23215e-06
ENSMUSG00000005732	Ranbp1	2329.97	-0.540214	0.0996066	-5.42348	5.84502e-08	1.26925e-06
ENSMUSG00000015305	Sash1	42.616	-2.8296	0.522342	-5.41714	6.05603e-08	1.31324e-06
ENSMUSG00000057531	Dtnbp1	1282.15	-0.719961	0.133005	-5.41305	6.19594e-08	1.34171e-06
ENSMUSG00000058600	Rpl30	5010.4	-0.458038	0.0846679	-5.40982	6.30865e-08	1.36421e-06
ENSMUSG00000002477	Snrpd1	2556.82	-0.486303	0.0899351	-5.40726	6.39951e-08	1.38008e-06
ENSMUSG00000037313	Tacc3	587.365	-0.678074	0.125401	-5.40726	6.39979e-08	1.38008e-06
ENSMUSG00000083899	Gm12346	1938.99	-0.424549	0.0785268	-5.40642	6.42986e-08	1.38465e-06
ENSMUSG00000038393	Txnip	3101.92	0.492251	0.0912438	5.3949	6.85614e-08	1.4744e-06
ENSMUSG00000020385	Clk4	896.61	0.619757	0.114986	5.38986	7.05145e-08	1.5124e-06
ENSMUSG00000026782	Abi2	568.469	-0.716347	0.132912	-5.38963	7.06043e-08	1.5124e-06
ENSMUSG00000045128	Rpl18a	2777.62	-0.510964	0.0948058	-5.38959	7.06204e-08	1.5124e-06
ENSMUSG00000029614	Rpl6	10937.7	-0.354495	0.0657842	-5.38875	7.095e-08	1.51737e-06
ENSMUSG00000026950	Neb	114.196	1.9106	0.354695	5.3866	7.18041e-08	1.53353e-06
ENSMUSG00000059142	Zfp945	461.287	0.82691	0.153626	5.38262	7.34094e-08	1.56566e-06
ENSMUSG00000031403	Dkc1	3423.09	-0.352729	0.0655523	-5.38088	7.41216e-08	1.57869e-06
ENSMUSG00000014226	Cacybp	1139.86	-0.58865	0.109467	-5.37744	7.55537e-08	1.60699e-06
ENSMUSG00000002010	Idh3g	938.98	-0.53328	0.0992657	-5.37225	7.77587e-08	1.65163e-06
ENSMUSG00000005947	Itgae	469.724	2.13658	0.39786	5.37019	7.86544e-08	1.66837e-06
ENSMUSG00000024661	Fth1	6058.38	-0.411516	0.0767827	-5.35948	8.34599e-08	1.76789e-06
ENSMUSG00000021707	Dhfr	593.654	-0.702179	0.131067	-5.35741	8.44216e-08	1.78583e-06
ENSMUSG00000045962	Wnk1	4888.5	0.38068	0.0710881	5.35505	8.55337e-08	1.8069e-06
ENSMUSG00000029772	Ahcyl2	1131.66	1.34297	0.250886	5.35291	8.65501e-08	1.82589e-06
ENSMUSG00000021745	Ptprg	32.3434	3.3745	0.63093	5.34844	8.8714e-08	1.869e-06
ENSMUSG00000005566	Trim28	2573.23	-0.405508	0.0758242	-5.348	8.89313e-08	1.87105e-06
ENSMUSG00000003949	Hlf	23.8948	4.30195	0.804922	5.34456	9.06379e-08	1.90438e-06
ENSMUSG00000017002	Slpi	22.2695	7.02075	1.31372	5.34419	9.08216e-08	1.90566e-06
ENSMUSG00000052914	Cyp2j6	208.773	1.13804	0.21299	5.34314	9.13503e-08	1.91417e-06
ENSMUSG00000104291	A130071D04Rik	1384.24	0.478478	0.0895707	5.3419	9.19776e-08	1.92472e-06
ENSMUSG00000028152	Tspan5	240.981	-1.05676	0.19806	-5.33556	9.52479e-08	1.99048e-06
ENSMUSG00000017499	Cdc6	316.047	-0.934159	0.175101	-5.33497	9.55618e-08	1.99436e-06
ENSMUSG00000066037	Hnrnpr	2623.73	0.373381	0.0701353	5.32372	1.01669e-07	2.11897e-06
ENSMUSG00000060938	Rpl26	8616.85	-0.347248	0.0652406	-5.32256	1.02314e-07	2.12956e-06
ENSMUSG00000090019	Gimap1	1516.98	0.522905	0.0982506	5.32216	1.02543e-07	2.13147e-06
ENSMUSG00000028378	Ptgr1	129.078	-1.58403	0.297724	-5.32047	1.03498e-07	2.14845e-06
ENSMUSG00000001248	Gramd1a	651.535	-0.621735	0.116892	-5.31888	1.04409e-07	2.16447e-06
ENSMUSG00000042524	Sun2	3539.48	0.375387	0.0706274	5.31504	1.06632e-07	2.20761e-06
ENSMUSG00000102051	I830127L07Rik	28.172	4.1524	0.781704	5.31198	1.08442e-07	2.24209e-06
ENSMUSG00000029632	Ndufa4	946.678	-0.574943	0.108261	-5.31071	1.09201e-07	2.25478e-06
ENSMUSG00000104101	Gm37881	622.639	0.825062	0.155432	5.30818	1.10723e-07	2.28318e-06
ENSMUSG00000026020	Nop58	4271.66	-0.376702	0.0711238	-5.29643	1.18087e-07	2.43181e-06
ENSMUSG00000086841	2410006H16Rik	2260.7	-0.431534	0.0814826	-5.29603	1.18349e-07	2.43399e-06
ENSMUSG00000060703	Cd302	114.909	1.59651	0.301731	5.29119	1.21525e-07	2.49309e-06
ENSMUSG00000097769	Snhg4	1016.22	-0.741526	0.140144	-5.29116	1.21544e-07	2.49309e-06
ENSMUSG00000050310	Rictor	943.552	0.618592	0.116925	5.29052	1.2197e-07	2.49854e-06
ENSMUSG00000037601	Nme1	1343.33	-0.510834	0.0966042	-5.28791	1.23722e-07	2.5311e-06
ENSMUSG00000024899	Papss2	59.606	2.2342	0.423162	5.27979	1.29335e-07	2.63897e-06
ENSMUSG00000035623	Rsf1	2077.56	0.425272	0.0805454	5.2799	1.29251e-07	2.63897e-06
ENSMUSG00000098120	Gm5914	436.6	0.850571	0.161121	5.27908	1.29831e-07	2.64563e-06
ENSMUSG00000029634	Rnf6	877.602	0.58434	0.110716	5.27782	1.3073e-07	2.66046e-06
ENSMUSG00000069662	Marcks	11560.2	0.276985	0.0526358	5.2623	1.42267e-07	2.89146e-06
ENSMUSG00000043336	Filip1l	1280.59	0.533111	0.101397	5.25769	1.45879e-07	2.961e-06
ENSMUSG00000097536	2610037D02Rik	277.458	1.00064	0.190424	5.2548	1.48184e-07	3.00387e-06
ENSMUSG00000049606	Zfp644	2324.55	0.396941	0.0755672	5.25282	1.49789e-07	3.03246e-06
ENSMUSG00000022711	Pmm2	430.168	0.808622	0.15407	5.24841	1.53419e-07	3.09595e-06
ENSMUSG00000023972	Ptk7	325.017	-1.07779	0.205343	-5.24873	1.53152e-07	3.09595e-06
ENSMUSG00000062328	Rpl17	11158.1	-0.271797	0.0517879	-5.24828	1.53523e-07	3.09595e-06
ENSMUSG00000014470	Rnf166	1365.5	0.541558	0.1032	5.24766	1.54047e-07	3.10248e-06
ENSMUSG00000008333	Snrpb2	3854.66	-0.322939	0.0615585	-5.24606	1.55388e-07	3.12546e-06
ENSMUSG00000041431	Ccnb1	326.618	-1.18744	0.226483	-5.24294	1.58034e-07	3.17457e-06
ENSMUSG00000001525	Tubb5	7752.34	-0.295677	0.0564599	-5.23694	1.63262e-07	3.27536e-06
ENSMUSG00000047215	Rpl9	4227.34	-0.407143	0.077764	-5.23562	1.64434e-07	3.29461e-06
ENSMUSG00000004552	Ctse	181.069	1.25656	0.240024	5.23514	1.64864e-07	3.29897e-06
ENSMUSG00000003970	Rpl8	11613.9	-0.349991	0.0668656	-5.23424	1.65665e-07	3.3065e-06
ENSMUSG00000018102	Hist1h2bc	161.626	-1.29179	0.246789	-5.23441	1.65511e-07	3.3065e-06
ENSMUSG00000004446	Bid	182.597	-1.20831	0.231143	-5.22752	1.71797e-07	3.42449e-06
ENSMUSG00000002083	Bbc3	558.708	0.684122	0.130892	5.22663	1.72631e-07	3.43671e-06
ENSMUSG00000021236	Entpd5	641.655	0.799176	0.153068	5.22104	1.77921e-07	3.53749e-06
ENSMUSG00000021218	Gdi2	3907.85	-0.373572	0.0715939	-5.21793	1.80936e-07	3.59283e-06
ENSMUSG00000038213	Tapbpl	304.836	0.89642	0.171919	5.21419	1.8462e-07	3.66132e-06
ENSMUSG00000032097	Ddx6	3311.02	0.377662	0.0724805	5.21053	1.88299e-07	3.72477e-06
ENSMUSG00000072769	Gm10419	39.7512	-2.67105	0.512606	-5.21073	1.88102e-07	3.72477e-06
ENSMUSG00000025534	Gusb	484.505	-0.77991	0.149782	-5.20698	1.91936e-07	3.7919e-06
ENSMUSG00000048118	Arid4a	4846.73	0.393561	0.0756678	5.20116	1.98044e-07	3.9076e-06
ENSMUSG00000006585	Cdt1	709.516	-0.590917	0.113643	-5.19978	1.99523e-07	3.93178e-06
ENSMUSG00000021771	Vdac2	1968.13	-0.403999	0.077729	-5.19754	2.01946e-07	3.97451e-06
ENSMUSG00000050587	Lrrc4c	24.561	-3.88632	0.748399	-5.19284	2.07108e-07	4.07094e-06
ENSMUSG00000030659	Nucb2	41.8789	2.91669	0.562305	5.18703	2.13679e-07	4.1948e-06
ENSMUSG00000041272	Tox	1314.74	0.51599	0.0995317	5.18418	2.16963e-07	4.25389e-06
ENSMUSG00000024669	Cd5	103.213	-1.51819	0.293149	-5.1789	2.23202e-07	4.37071e-06
ENSMUSG00000058099	Nfam1	144.059	-1.63131	0.315136	-5.17654	2.26036e-07	4.42064e-06
ENSMUSG00000037563	Rps16	18689.2	-0.314304	0.0607269	-5.17569	2.27068e-07	4.43525e-06
ENSMUSG00000022500	Litaf	201.516	-1.10539	0.21364	-5.17408	2.29039e-07	4.46813e-06
ENSMUSG00000041607	Mbp	1257.15	0.606058	0.117227	5.16996	2.34144e-07	4.56199e-06
ENSMUSG00000000673	Haao	181.568	-1.2368	0.239487	-5.16435	2.41273e-07	4.68913e-06
ENSMUSG00000026103	Gls	2560.85	0.376059	0.0728269	5.16374	2.4207e-07	4.69876e-06
ENSMUSG00000032422	Snx14	956.32	-0.53963	0.104515	-5.16318	2.42788e-07	4.70682e-06
ENSMUSG00000037095	Lrg1	14.2772	7.35121	1.42434	5.16112	2.45471e-07	4.75291e-06
ENSMUSG00000004709	Cd244	426.967	-0.837475	0.162283	-5.16058	2.46191e-07	4.76092e-06
ENSMUSG00000062380	Tubb3	195.74	1.18501	0.22979	5.1569	2.51073e-07	4.8493e-06
ENSMUSG00000037936	Scarb1	239.581	-0.977565	0.189678	-5.15381	2.55243e-07	4.92372e-06
ENSMUSG00000003037	Rab8a	2054.94	0.444636	0.0863193	5.15106	2.5902e-07	4.99039e-06
ENSMUSG00000029299	Abcg3	299.85	1.02433	0.199178	5.14278	2.70699e-07	5.20894e-06
ENSMUSG00000024486	Hbegf	118.502	-1.46486	0.284862	-5.14237	2.71288e-07	5.21384e-06
ENSMUSG00000058655	Eif4b	1750.64	-0.440833	0.0857408	-5.14146	2.72617e-07	5.2329e-06
ENSMUSG00000042249	Adrbk2	468.723	-0.825117	0.160553	-5.13923	2.75874e-07	5.28888e-06
ENSMUSG00000027035	Cers6	400.083	-0.800863	0.155846	-5.13881	2.76481e-07	5.294e-06
ENSMUSG00000006344	Ggt5	188.326	-1.14239	0.222624	-5.13146	2.87497e-07	5.49816e-06
ENSMUSG00000059796	Eif4a1	2320.04	-0.470555	0.0917155	-5.1306	2.88826e-07	5.51678e-06
ENSMUSG00000102277	A130050O07Rik	1026.41	0.525336	0.102507	5.12488	2.97726e-07	5.67982e-06
ENSMUSG00000025058	5430427O19Rik	244.622	-1.02596	0.200356	-5.12066	3.04463e-07	5.80121e-06
ENSMUSG00000035561	Aldh1b1	1023.34	-0.530821	0.103684	-5.1196	3.0619e-07	5.82698e-06
ENSMUSG00000083496	Gm11263	1821.75	-0.532115	0.104099	-5.11163	3.1939e-07	6.07075e-06
ENSMUSG00000020265	Sumo3	3185.37	-0.378743	0.0741041	-5.11096	3.20523e-07	6.08484e-06
ENSMUSG00000027875	Hmgcs2	33.6327	2.7601	0.540108	5.11028	3.21685e-07	6.09945e-06
ENSMUSG00000028086	Fbxw7	1586.21	0.458584	0.0897878	5.10743	3.26575e-07	6.18464e-06
ENSMUSG00000038811	Gngt2	340.745	0.86133	0.168944	5.09831	3.42703e-07	6.48217e-06
ENSMUSG00000040084	Bub1b	339.332	-1.06814	0.209608	-5.09589	3.47105e-07	6.55745e-06
ENSMUSG00000052142	Rasal3	935.977	0.519436	0.101957	5.09467	3.49356e-07	6.59198e-06
ENSMUSG00000057637	Prdm2	635.494	0.734039	0.144092	5.09425	3.50128e-07	6.59854e-06
ENSMUSG00000024844	Banf1	1763.97	-0.4937	0.0970091	-5.08922	3.59547e-07	6.76784e-06
ENSMUSG00000024353	Mzb1	155.753	1.2389	0.243467	5.08859	3.60735e-07	6.78198e-06
ENSMUSG00000019998	Stx7	382.747	-0.785035	0.154302	-5.08766	3.62512e-07	6.80716e-06
ENSMUSG00000026565	Pou2f1	1068.92	0.571897	0.112579	5.07996	3.7751e-07	7.08025e-06
ENSMUSG00000022811	Zfp148	1586.81	0.409257	0.0805799	5.0789	3.79624e-07	7.11132e-06
ENSMUSG00000042606	Hirip3	436.879	-0.806978	0.158995	-5.07549	3.86506e-07	7.23152e-06
ENSMUSG00000042228	Lyn	477.344	-0.727824	0.14351	-5.07157	3.94542e-07	7.373e-06
ENSMUSG00000002804	Nudt14	180.189	1.31244	0.2588	5.07125	3.95202e-07	7.37647e-06
ENSMUSG00000045441	Gprin3	158.255	1.2199	0.240604	5.07017	3.97453e-07	7.40959e-06
ENSMUSG00000034724	Cnot6l	3615.02	0.363909	0.0717872	5.06927	3.99343e-07	7.4359e-06
ENSMUSG00000032763	Ilvbl	345.511	0.847084	0.167295	5.06343	4.11785e-07	7.65842e-06
ENSMUSG00000031304	Il2rg	1641.01	0.459267	0.0907457	5.06103	4.16996e-07	7.74606e-06
ENSMUSG00000027469	Tpx2	937.433	-0.515465	0.101859	-5.06058	4.17972e-07	7.75493e-06
ENSMUSG00000026872	Zeb2	620.989	-0.61218	0.121061	-5.05678	4.26406e-07	7.90197e-06
ENSMUSG00000027342	Pcna	731.526	-0.67417	0.133337	-5.05615	4.27805e-07	7.91847e-06
ENSMUSG00000040407	Akap9	3488.01	0.369164	0.0730705	5.05215	4.36853e-07	8.07633e-06
ENSMUSG00000043987	Cep164	480.367	0.812681	0.161189	5.04178	4.61231e-07	8.51689e-06
ENSMUSG00000057219	Armc7	75.5598	1.82961	0.363035	5.03975	4.66139e-07	8.59731e-06
ENSMUSG00000021134	Srsf5	2472.87	-0.386935	0.0767953	-5.03852	4.69136e-07	8.64233e-06
ENSMUSG00000069833	Ahnak	136.568	1.2773	0.253623	5.03622	4.74818e-07	8.73665e-06
ENSMUSG00000086470	Gm12580	12.5704	7.16377	1.42315	5.03375	4.80984e-07	8.83965e-06
ENSMUSG00000039157	Fam102a	392.51	0.981525	0.195043	5.03236	4.84487e-07	8.89352e-06
ENSMUSG00000074918	Inafm2	784.147	0.614807	0.122265	5.02849	4.94369e-07	9.06422e-06
ENSMUSG00000040270	Bach2	890.774	0.590859	0.117541	5.02682	4.98681e-07	9.13251e-06
ENSMUSG00000021868	Ppif	630.985	-0.693567	0.138044	-5.02423	5.05463e-07	9.24582e-06
ENSMUSG00000029840	Mtpn	2026.59	-0.401255	0.0800004	-5.01567	5.28499e-07	9.65581e-06
ENSMUSG00000019961	Tmpo	2002.37	-0.436858	0.0871114	-5.01494	5.30509e-07	9.68116e-06
ENSMUSG00000035530	Eif1	2933.05	-0.369585	0.0737095	-5.01408	5.32871e-07	9.71288e-06
ENSMUSG00000103358	Gm37593	240.861	1.07942	0.215298	5.01359	5.3425e-07	9.7266e-06
ENSMUSG00000000552	Zfp385a	304.48	-0.890616	0.177696	-5.01203	5.38598e-07	9.79429e-06
ENSMUSG00000020189	Osbpl8	1162.1	-0.456833	0.091156	-5.01155	5.39936e-07	9.80716e-06
ENSMUSG00000015759	Cnih1	751.127	-0.611255	0.122124	-5.00521	5.58011e-07	1.01236e-05
ENSMUSG00000026827	Gpd2	1023.39	-0.541467	0.108282	-5.00054	5.71699e-07	1.03599e-05
ENSMUSG00000034152	Exoc3	364.388	1.08325	0.216713	4.99856	5.77596e-07	1.04339e-05
ENSMUSG00000039001	Rps21	21852.7	-0.311968	0.0624114	-4.99857	5.77575e-07	1.04339e-05
ENSMUSG00000072082	Ccnf	162.919	-1.34119	0.268319	-4.99849	5.77796e-07	1.04339e-05
ENSMUSG00000021779	Thrb	496.643	0.71191	0.142536	4.99459	5.89617e-07	1.06337e-05
ENSMUSG00000037270	4932438A13Rik	1824.89	0.451863	0.0904741	4.99439	5.90227e-07	1.06337e-05
ENSMUSG00000034563	Ccpg1	215.348	1.1618	0.232643	4.99394	5.91589e-07	1.06459e-05
ENSMUSG00000037355	Uvssa	837.653	0.615964	0.123358	4.99331	5.93524e-07	1.06683e-05
ENSMUSG00000027508	Pag1	2224.05	0.3638	0.0728878	4.99124	5.99934e-07	1.07711e-05
ENSMUSG00000079853	Klra1	32.0037	-2.99432	0.600257	-4.9884	6.08818e-07	1.0918e-05
ENSMUSG00000007880	Arid1a	3272.46	-0.352359	0.0706924	-4.9844	6.21537e-07	1.11333e-05
ENSMUSG00000029591	Ung	460.225	-0.852987	0.171253	-4.98086	6.33025e-07	1.1326e-05
ENSMUSG00000068129	Cst7	1784.07	-0.508481	0.102119	-4.9793	6.38148e-07	1.14045e-05
ENSMUSG00000039219	Arid4b	5535.3	0.406225	0.0816174	4.97718	6.45159e-07	1.15166e-05
ENSMUSG00000001739	Cldn15	12.1066	7.11089	1.42901	4.9761	6.48766e-07	1.15677e-05
ENSMUSG00000047959	Kcna3	57.7981	2.07481	0.417	4.97557	6.5056e-07	1.15864e-05
ENSMUSG00000022057	Adamdec1	31.9466	-3.4893	0.701776	-4.9721	6.62321e-07	1.17823e-05
ENSMUSG00000020422	Tns3	977.2	-0.519458	0.104494	-4.97118	6.6545e-07	1.18245e-05
ENSMUSG00000042508	Dmtf1	680.809	0.606068	0.122001	4.96774	6.77388e-07	1.20229e-05
ENSMUSG00000041328	Pcf11	1294.25	0.444692	0.0895426	4.96626	6.82548e-07	1.21006e-05
ENSMUSG00000008540	Mgst1	12.5374	7.1671	1.44324	4.96599	6.83521e-07	1.21041e-05
ENSMUSG00000029007	Agtrap	827.814	0.6669	0.1343	4.96575	6.8436e-07	1.21052e-05
ENSMUSG00000054702	Ap1s3	207.227	-1.10651	0.223	-4.96191	6.98027e-07	1.23329e-05
ENSMUSG00000038708	Golga4	1978.03	0.391551	0.0790834	4.95111	7.3791e-07	1.30227e-05
ENSMUSG00000062006	Rpl34	11983.7	-0.272998	0.0551794	-4.94745	7.51912e-07	1.32548e-05
ENSMUSG00000030180	Kdm5a	3796.35	0.318526	0.0645058	4.93795	7.89474e-07	1.39012e-05
ENSMUSG00000032011	Thy1	295.336	1.09397	0.221645	4.93569	7.98695e-07	1.40476e-05
ENSMUSG00000102423	Gm37465	524.372	0.71749	0.145397	4.93471	8.02706e-07	1.41022e-05
ENSMUSG00000026770	Il2ra	16793.1	0.254922	0.0516959	4.93118	8.17329e-07	1.43429e-05
ENSMUSG00000030161	Gabarapl1	705.468	-0.784795	0.159193	-4.92984	8.22968e-07	1.44256e-05
ENSMUSG00000084796	Mir142hg	1800.62	0.427236	0.086788	4.92276	8.53331e-07	1.4941e-05
ENSMUSG00000039477	Tnrc18	1506.83	0.508833	0.103463	4.918	8.74312e-07	1.52911e-05
ENSMUSG00000018750	Zbtb4	377.424	0.854419	0.173835	4.91513	8.87246e-07	1.54999e-05
ENSMUSG00000022814	Umps	324.562	-0.861145	0.175528	-4.90604	9.29354e-07	1.62069e-05
ENSMUSG00000095041	PISD	2343.89	0.374368	0.076309	4.90594	9.29802e-07	1.62069e-05
ENSMUSG00000036501	Fam13b	447.315	0.72929	0.148687	4.90487	9.34915e-07	1.62778e-05
ENSMUSG00000035208	Slfn8	414.937	0.718962	0.146589	4.90461	9.36149e-07	1.6281e-05
ENSMUSG00000021595	Nsun2	1318.91	-0.481855	0.0982656	-4.9036	9.40983e-07	1.63468e-05
ENSMUSG00000029580	Actb	69094.2	-0.26325	0.0536893	-4.90321	9.42822e-07	1.63605e-05
ENSMUSG00000092060	Bend4	119.3	-1.47405	0.300646	-4.90294	9.44141e-07	1.63651e-05
ENSMUSG00000020393	Kremen1	265.488	0.946854	0.193396	4.89594	9.78374e-07	1.69396e-05
ENSMUSG00000061577	Adgrg5	690.14	-0.628574	0.128396	-4.89557	9.80202e-07	1.69524e-05
ENSMUSG00000032481	Smarcc1	5326.14	-0.312727	0.0639438	-4.89066	1.00498e-06	1.73488e-05
ENSMUSG00000054006	D630008O14Rik	267.62	1.00696	0.205898	4.89059	1.00536e-06	1.73488e-05
ENSMUSG00000025464	Paox	300.197	-1.09784	0.224634	-4.88725	1.02256e-06	1.76261e-05
ENSMUSG00000028756	Pink1	921.126	0.530548	0.108574	4.88651	1.02638e-06	1.76723e-05
ENSMUSG00000046330	Rpl37a	12243.6	-0.332147	0.0679865	-4.88549	1.03174e-06	1.7745e-05
ENSMUSG00000018474	Chd3	1946.94	0.428314	0.0876975	4.884	1.03957e-06	1.78599e-05
ENSMUSG00000002870	Mcm2	655.149	-0.680966	0.139435	-4.88375	1.04087e-06	1.78625e-05
ENSMUSG00000036781	Rps27l	3147.72	-0.398081	0.0815164	-4.88345	1.04248e-06	1.78704e-05
ENSMUSG00000070493	Chchd2	9630.56	-0.303442	0.0622827	-4.87202	1.10466e-06	1.89154e-05
ENSMUSG00000030779	Rbbp6	4931.41	0.312903	0.0642602	4.86932	1.11985e-06	1.91545e-05
ENSMUSG00000027828	Ssr3	1570.25	-0.40879	0.0840224	-4.86524	1.14315e-06	1.95316e-05
ENSMUSG00000000740	Rpl13	8727.79	-0.390902	0.0803924	-4.86242	1.15957e-06	1.97904e-05
ENSMUSG00000097195	Snhg5	608.054	-0.655367	0.134799	-4.86179	1.16328e-06	1.98319e-05
ENSMUSG00000020863	Luc7l3	8448.83	0.253467	0.0521544	4.85993	1.17425e-06	1.9997e-05
ENSMUSG00000023940	Sgol1	411.048	-0.810259	0.166957	-4.8531	1.21544e-06	2.06759e-05
ENSMUSG00000021391	Cenpp	127.858	-1.24897	0.257414	-4.85198	1.22236e-06	2.07708e-05
ENSMUSG00000018770	Atp5g3	5130.17	-0.31844	0.065646	-4.85087	1.22919e-06	2.0864e-05
ENSMUSG00000024981	Acsl5	726.599	-0.574844	0.118518	-4.85026	1.23297e-06	2.08942e-05
ENSMUSG00000034163	Zfc3h1	2240.23	0.431148	0.0888936	4.85015	1.23366e-06	2.08942e-05
ENSMUSG00000026003	Acadl	3006.67	0.390502	0.0805358	4.8488	1.24209e-06	2.09913e-05
ENSMUSG00000103126	Gm37387	32.3088	2.73735	0.56452	4.84898	1.24097e-06	2.09913e-05
ENSMUSG00000062270	Morf4l1	1064.37	0.486956	0.100519	4.84444	1.26966e-06	2.1434e-05
ENSMUSG00000070476	Fam217b	52.7523	-2.30358	0.475541	-4.84412	1.27176e-06	2.14462e-05
ENSMUSG00000079470	Utp14b	240.833	-1.01238	0.209021	-4.84344	1.27612e-06	2.14963e-05
ENSMUSG00000029313	Aff1	1047.87	0.506941	0.104768	4.83872	1.3068e-06	2.19894e-05
ENSMUSG00000026669	Mcm10	245.035	-1.06448	0.220052	-4.83744	1.31525e-06	2.21076e-05
ENSMUSG00000025220	Mgea5	2402.4	0.349926	0.072379	4.83464	1.33384e-06	2.23959e-05
ENSMUSG00000040952	Rps19	18390.9	-0.262967	0.0543949	-4.8344	1.3355e-06	2.23995e-05
ENSMUSG00000078247	Airn	187.239	1.4015	0.289951	4.83357	1.34104e-06	2.24682e-05
ENSMUSG00000003808	Farsa	1637.28	-0.527407	0.10913	-4.83284	1.34601e-06	2.25272e-05
ENSMUSG00000021719	Rgs7bp	50.4417	-2.06286	0.427315	-4.82749	1.38264e-06	2.31153e-05
ENSMUSG00000022186	Oxct1	1037.17	-0.473946	0.0982381	-4.82446	1.40384e-06	2.34446e-05
ENSMUSG00000067288	Rps28	9162.83	-0.281816	0.0584238	-4.82365	1.40953e-06	2.35143e-05
ENSMUSG00000050600	Zfp831	282.705	-0.952233	0.197593	-4.81917	1.44156e-06	2.40151e-05
ENSMUSG00000063445	Nmral1	226.372	-0.976767	0.20269	-4.81902	1.44264e-06	2.40151e-05
ENSMUSG00000024511	Rab27b	105.288	1.46181	0.303487	4.81673	1.45933e-06	2.42671e-05
ENSMUSG00000045302	Preb	877.774	0.542033	0.112673	4.81067	1.50422e-06	2.49868e-05
ENSMUSG00000025218	Poll	123.388	-1.3565	0.282016	-4.81004	1.50904e-06	2.504e-05
ENSMUSG00000020739	Nup85	935.057	-0.531425	0.11052	-4.80842	1.52129e-06	2.52164e-05
ENSMUSG00000034664	Itga2b	159.87	-1.49443	0.311322	-4.80026	1.58462e-06	2.62382e-05
ENSMUSG00000026004	Kansl1l	600.603	0.744963	0.155279	4.79759	1.60586e-06	2.65615e-05
ENSMUSG00000063273	Naa15	4951.33	0.348868	0.0727647	4.79447	1.63107e-06	2.695e-05
ENSMUSG00000003429	Rps11	4676.72	-0.436833	0.0912031	-4.78968	1.67048e-06	2.75426e-05
ENSMUSG00000027248	Pdia3	2500.42	0.395056	0.082478	4.78983	1.66919e-06	2.75426e-05
ENSMUSG00000046207	Pik3r6	30.8676	-2.81201	0.587386	-4.78733	1.69013e-06	2.7837e-05
ENSMUSG00000049502	Dtx3l	1138.72	0.504316	0.105379	4.78572	1.70373e-06	2.80313e-05
ENSMUSG00000039542	Ncam1	43.2762	2.64878	0.553525	4.78529	1.70743e-06	2.80624e-05
ENSMUSG00000025393	Atp5b	5815.02	-0.289139	0.060426	-4.78501	1.70981e-06	2.8072e-05
ENSMUSG00000020111	Micu1	145.684	-1.21905	0.254849	-4.78342	1.7234e-06	2.82652e-05
ENSMUSG00000041126	H2afv	3815.55	-0.324516	0.0678567	-4.78237	1.73241e-06	2.83831e-05
ENSMUSG00000042106	Fam212a	235.498	-1.05821	0.2215	-4.77746	1.77526e-06	2.90545e-05
ENSMUSG00000021643	Serf1	280.916	-0.887496	0.185794	-4.77677	1.78132e-06	2.9123e-05
ENSMUSG00000026385	Dbi	1320.8	-0.40894	0.0856441	-4.77487	1.7982e-06	2.9368e-05
ENSMUSG00000070034	Sp110	393.609	0.695867	0.145771	4.77369	1.80881e-06	2.95103e-05
ENSMUSG00000024120	Lrpprc	538.315	-0.688662	0.144277	-4.77319	1.81327e-06	2.95521e-05
ENSMUSG00000033910	Gucy1a3	123.793	-1.77206	0.371293	-4.77266	1.81811e-06	2.96e-05
ENSMUSG00000047446	Arl4a	666.056	0.560301	0.117464	4.77	1.8423e-06	2.99624e-05
ENSMUSG00000022475	Hdac7	1608.92	0.38442	0.0806123	4.76875	1.85373e-06	3.01168e-05
ENSMUSG00000061904	Slc25a3	3838.25	-0.326233	0.0684208	-4.76804	1.86028e-06	3.01917e-05
ENSMUSG00000046027	Stard5	473.937	0.772846	0.16211	4.76742	1.86602e-06	3.02217e-05
ENSMUSG00000055541	Lair1	412.088	-0.713283	0.14961	-4.76763	1.8641e-06	3.02217e-05
ENSMUSG00000028161	Ppp3ca	3231.93	0.363995	0.0764123	4.76357	1.90194e-06	3.07715e-05
ENSMUSG00000022652	Morc1	107.335	1.76912	0.371715	4.75935	1.94222e-06	3.13904e-05
ENSMUSG00000060639	Hist1h4i	427.633	-0.805066	0.169228	-4.75729	1.96212e-06	3.16792e-05
ENSMUSG00000000594	Gm2a	1686.57	-0.499909	0.105105	-4.75628	1.97195e-06	3.18049e-05
ENSMUSG00000007415	Gatad1	786.833	-0.509406	0.107124	-4.7553	1.9815e-06	3.19258e-05
ENSMUSG00000032946	Rasgrp2	2721.34	-0.433077	0.091096	-4.75407	1.99357e-06	3.20656e-05
ENSMUSG00000061536	Sec22c	170.9	1.03243	0.217171	4.754	1.99431e-06	3.20656e-05
ENSMUSG00000032370	Lactb	400.798	-0.779926	0.164103	-4.75265	2.00768e-06	3.22474e-05
ENSMUSG00000028367	Txn1	3266.75	-0.40855	0.0860295	-4.74895	2.04472e-06	3.28084e-05
ENSMUSG00000023104	Rfc2	889.373	-0.640363	0.134882	-4.74758	2.05862e-06	3.29973e-05
ENSMUSG00000086534	Gm16758	48.6376	-2.09346	0.441233	-4.74456	2.0896e-06	3.34594e-05
ENSMUSG00000046865	Fbl	978.499	-0.517077	0.109067	-4.7409	2.12773e-06	3.40349e-05
ENSMUSG00000026088	Mitd1	747.417	0.542579	0.114559	4.73626	2.17699e-06	3.47871e-05
ENSMUSG00000020808	Fam64a	178.962	-1.09402	0.231004	-4.73592	2.18059e-06	3.48089e-05
ENSMUSG00000034640	Tiparp	393.744	0.981566	0.207304	4.7349	2.19164e-06	3.49493e-05
ENSMUSG00000041219	Arhgap11a	373.819	-0.760747	0.160697	-4.73403	2.20103e-06	3.50632e-05
ENSMUSG00000026034	Clk1	2779.19	0.358929	0.0758573	4.73163	2.22721e-06	3.54439e-05
ENSMUSG00000025492	Ifitm3	7125.7	-0.316805	0.0670548	-4.72456	2.30613e-06	3.66623e-05
ENSMUSG00000084978	Gm11655	877.4	0.723676	0.153194	4.72392	2.31338e-06	3.674e-05
ENSMUSG00000031825	Crispld2	18.6204	4.46694	0.946097	4.72145	2.34173e-06	3.71523e-05
ENSMUSG00000031668	Eif2ak3	149.832	1.22544	0.259622	4.7201	2.35726e-06	3.73605e-05
ENSMUSG00000031822	Gse1	261.826	0.849309	0.179962	4.71937	2.36572e-06	3.74564e-05
ENSMUSG00000002748	Baz1b	5062.75	0.326592	0.0692154	4.71849	2.37606e-06	3.75818e-05
ENSMUSG00000040557	Wbscr27	481.93	0.668058	0.141627	4.71704	2.393e-06	3.78114e-05
ENSMUSG00000033307	Mif	847.709	-0.754543	0.160072	-4.71376	2.43188e-06	3.83866e-05
ENSMUSG00000040028	Elavl1	1183.7	-0.509452	0.108087	-4.71337	2.4365e-06	3.84207e-05
ENSMUSG00000037533	Rapgef6	1009.1	0.483802	0.102654	4.71293	2.44186e-06	3.8466e-05
ENSMUSG00000027130	Slc12a6	722.765	-0.592969	0.12584	-4.7121	2.45172e-06	3.85823e-05
ENSMUSG00000023927	Satb1	4060.4	0.35543	0.0754568	4.71038	2.47257e-06	3.88711e-05
ENSMUSG00000056608	Chd9	2508.39	0.418802	0.0889157	4.7101	2.47595e-06	3.88849e-05
ENSMUSG00000032783	Troap	84.6054	-1.57219	0.334101	-4.70573	2.52962e-06	3.96878e-05
ENSMUSG00000025780	Itih5	253.482	-1.04519	0.222211	-4.70361	2.55604e-06	4.00617e-05
ENSMUSG00000059291	Rpl11	10333.1	-0.295395	0.0628166	-4.7025	2.56994e-06	4.02391e-05
ENSMUSG00000022528	Hes1	1339.83	0.475159	0.101157	4.69724	2.63701e-06	4.12477e-05
ENSMUSG00000023827	Agpat4	107.713	1.51123	0.321982	4.69351	2.68552e-06	4.19643e-05
ENSMUSG00000028266	Lmo4	1241.13	0.586746	0.125063	4.69158	2.71097e-06	4.23195e-05
ENSMUSG00000036046	5031439G07Rik	183.193	-1.25928	0.268445	-4.69102	2.7184e-06	4.23929e-05
ENSMUSG00000026192	Atic	561.708	-0.596232	0.127114	-4.69054	2.72481e-06	4.24502e-05
ENSMUSG00000025153	Fasn	892.496	-0.511815	0.109139	-4.68957	2.73779e-06	4.26098e-05
ENSMUSG00000038357	Camp	120.231	5.97798	1.27482	4.68927	2.74183e-06	4.263e-05
ENSMUSG00000030357	Fkbp4	1069.19	-0.68038	0.145123	-4.68829	2.75498e-06	4.27771e-05
ENSMUSG00000039193	Nlrc4	47.2619	-2.21789	0.473083	-4.68815	2.75679e-06	4.27771e-05
ENSMUSG00000021025	Nfkbia	1159.1	0.444144	0.094924	4.67895	2.88351e-06	4.46987e-05
ENSMUSG00000084302	Gm12194	143.055	1.39139	0.297606	4.67528	2.93551e-06	4.54595e-05
ENSMUSG00000032883	Acsl3	529.427	-0.63279	0.135406	-4.67327	2.96437e-06	4.58607e-05
ENSMUSG00000031788	Kifc3	83.5583	1.49018	0.318973	4.6718	2.98578e-06	4.6146e-05
ENSMUSG00000104145	D130019J16Rik	523.277	0.676231	0.144874	4.66772	3.04557e-06	4.70234e-05
ENSMUSG00000037466	4930427A07Rik	987.817	0.532704	0.114184	4.66533	3.08127e-06	4.75274e-05
ENSMUSG00000028426	Rad23b	2420.84	-0.346624	0.0743235	-4.66372	3.10544e-06	4.78526e-05
ENSMUSG00000052397	Ezr	3454.69	0.303587	0.0651305	4.66121	3.14348e-06	4.8391e-05
ENSMUSG00000037795	N4bp2	1422.82	0.401355	0.0861175	4.66055	3.15364e-06	4.84993e-05
ENSMUSG00000019850	Tnfaip3	148.292	1.25623	0.269577	4.65998	3.16241e-06	4.85861e-05
ENSMUSG00000063875	Rps6-ps1	992.714	-0.589131	0.126607	-4.65322	3.26786e-06	5.01566e-05
ENSMUSG00000046434	Hnrnpa1	208.926	-0.971044	0.208716	-4.65246	3.27993e-06	5.02923e-05
ENSMUSG00000097042	Gm17491	282.113	0.903017	0.194127	4.65169	3.29226e-06	5.04316e-05
ENSMUSG00000032254	Kif23	555.843	-0.94108	0.202645	-4.64399	3.41741e-06	5.22972e-05
ENSMUSG00000037234	Hook3	1035.94	0.440749	0.0949147	4.64363	3.42337e-06	5.23369e-05
ENSMUSG00000024462	Gabbr1	259.163	0.956106	0.205987	4.64158	3.45754e-06	5.28074e-05
ENSMUSG00000031634	Ufsp2	620.609	-0.648177	0.139655	-4.64128	3.46252e-06	5.28314e-05
ENSMUSG00000081051	Gm15427	7088.47	-0.278667	0.0600497	-4.6406	3.47404e-06	5.29553e-05
ENSMUSG00000097290	1300002E11Rik	289.147	0.892423	0.192327	4.64013	3.48185e-06	5.30224e-05
ENSMUSG00000034377	Tulp4	406.621	0.817778	0.176284	4.63898	3.50132e-06	5.32666e-05
ENSMUSG00000000753	Serpinf1	77.7563	-2.26983	0.489545	-4.63661	3.54164e-06	5.37749e-05
ENSMUSG00000045382	Cxcr4	1717.32	0.482859	0.104139	4.63668	3.54044e-06	5.37749e-05
ENSMUSG00000006398	Cdc20	268.017	-0.953606	0.206006	-4.62903	3.67388e-06	5.57283e-05
ENSMUSG00000076882	Traj49	34.0069	2.49271	0.539447	4.62086	3.82157e-06	5.79121e-05
ENSMUSG00000027215	Cd82	234.605	0.993637	0.215335	4.61438	3.94263e-06	5.96884e-05
ENSMUSG00000060802	B2m	30342.1	0.276325	0.0598881	4.61402	3.9496e-06	5.97358e-05
ENSMUSG00000028565	Nfia	329.233	0.850373	0.184348	4.61288	3.97133e-06	6.00061e-05
ENSMUSG00000042594	Sh2b3	374.205	-0.738755	0.160163	-4.61251	3.97828e-06	6.00528e-05
ENSMUSG00000057265	Ccdc176	165.764	1.03943	0.225484	4.60979	4.03077e-06	6.07861e-05
ENSMUSG00000037868	Egr2	32.4687	-3.09983	0.672765	-4.60759	4.07368e-06	6.13737e-05
ENSMUSG00000036223	Ska1	183.118	-1.00975	0.219243	-4.60563	4.11217e-06	6.18935e-05
ENSMUSG00000008496	Pou2f2	319.642	-0.808157	0.175509	-4.60466	4.13138e-06	6.21225e-05
ENSMUSG00000056763	Cspp1	1400.79	0.439874	0.0955962	4.60137	4.19721e-06	6.30515e-05
ENSMUSG00000021468	Sptlc1	606.369	0.594893	0.129308	4.60059	4.21294e-06	6.32266e-05
ENSMUSG00000060131	Atp8b4	5561.76	0.324798	0.0706075	4.60005	4.22389e-06	6.33298e-05
ENSMUSG00000059182	Skap2	341.222	-0.859808	0.187005	-4.59779	4.26997e-06	6.39591e-05
ENSMUSG00000022015	Tnfsf11	281.006	0.873589	0.190102	4.59536	4.31993e-06	6.46452e-05
ENSMUSG00000031255	Sytl4	56.4734	-1.82376	0.396902	-4.59499	4.32769e-06	6.4699e-05
ENSMUSG00000042444	Fam63b	859.229	0.508253	0.110619	4.59463	4.33525e-06	6.47498e-05
ENSMUSG00000008200	Fnbp4	1363.15	0.469721	0.1023	4.5916	4.39866e-06	6.56337e-05
ENSMUSG00000027067	Ssrp1	3098.51	-0.314692	0.0685493	-4.59075	4.41662e-06	6.58385e-05
ENSMUSG00000021990	Spata13	1393.19	0.401316	0.0874869	4.58716	4.49323e-06	6.69164e-05
ENSMUSG00000024696	Lpxn	558.681	0.701527	0.152962	4.58629	4.51184e-06	6.71293e-05
ENSMUSG00000022018	Rgcc	917.557	0.542849	0.118391	4.58523	4.53489e-06	6.74077e-05
ENSMUSG00000029516	Cit	866.689	-0.470481	0.102655	-4.58312	4.58082e-06	6.80254e-05
ENSMUSG00000052749	Trim30b	22.7788	-3.38681	0.739286	-4.58119	4.62336e-06	6.85916e-05
ENSMUSG00000032673	Prorsd1	492.813	-0.649512	0.141827	-4.57961	4.65839e-06	6.90454e-05
ENSMUSG00000082536	Gm13456	565.37	-0.668103	0.145919	-4.57858	4.68132e-06	6.93192e-05
ENSMUSG00000028270	Gbp2	555.955	0.805219	0.176035	4.57419	4.7806e-06	7.07219e-05
ENSMUSG00000002458	Rgs19	699.589	-0.589203	0.128897	-4.57113	4.85101e-06	7.16953e-05
ENSMUSG00000059631	1500035N22Rik	48.0884	2.03346	0.445028	4.56929	4.8937e-06	7.22576e-05
ENSMUSG00000030224	Strap	1130.9	-0.443589	0.0970915	-4.56877	4.90583e-06	7.2368e-05
ENSMUSG00000043252	Tmem64	439.82	0.819266	0.1794	4.56669	4.95492e-06	7.30228e-05
ENSMUSG00000097923	Gm26577	9.56802	6.77286	1.48326	4.56621	4.96622e-06	7.31201e-05
ENSMUSG00000038486	Sv2a	141.46	-1.12427	0.246554	-4.55995	5.11663e-06	7.52634e-05
ENSMUSG00000043241	Upf2	1632.73	0.373937	0.0820517	4.55733	5.18071e-06	7.61339e-05
ENSMUSG00000018501	Ncor1	8370.51	0.263409	0.0578202	4.55566	5.22223e-06	7.66716e-05
ENSMUSG00000103427	Gm37534	591.543	0.739291	0.162393	4.55248	5.30174e-06	7.77655e-05
ENSMUSG00000030284	Creld1	312.724	0.804191	0.17676	4.54963	5.37399e-06	7.8751e-05
ENSMUSG00000032216	Nedd4	4929.12	-0.323396	0.0711126	-4.54767	5.42436e-06	7.94143e-05
ENSMUSG00000039396	Neil3	155.507	-1.15417	0.253955	-4.5448	5.49886e-06	8.04292e-05
ENSMUSG00000064326	Siva1	952.328	-0.576093	0.126779	-4.54407	5.51773e-06	8.06294e-05
ENSMUSG00000030788	Rnf141	233.855	-0.921406	0.203038	-4.5381	5.67634e-06	8.28692e-05
ENSMUSG00000028702	Rad54l	469.971	-0.661565	0.145816	-4.53698	5.70669e-06	8.31561e-05
ENSMUSG00000048458	Fam212b	111.117	1.3123	0.28924	4.53706	5.7045e-06	8.31561e-05
ENSMUSG00000040681	Hmgn1	2602.18	-0.362291	0.0798948	-4.5346	5.77138e-06	8.402e-05
ENSMUSG00000006782	Cnp	1185.72	0.497509	0.109733	4.5338	5.79314e-06	8.41732e-05
ENSMUSG00000024781	Lipa	399.283	0.737592	0.162698	4.53352	5.801e-06	8.41732e-05
ENSMUSG00000027712	Anxa5	328.999	-0.79962	0.17637	-4.53375	5.79444e-06	8.41732e-05
ENSMUSG00000074129	Rpl13a	15328.7	-0.293008	0.0646328	-4.53342	5.80356e-06	8.41732e-05
ENSMUSG00000085741	5430405H02Rik	237.057	0.865627	0.191013	4.53177	5.84927e-06	8.47572e-05
ENSMUSG00000020070	Rufy2	419.814	0.766189	0.169272	4.52639	5.99993e-06	8.67786e-05
ENSMUSG00000023456	Tpi1	689.12	-0.753102	0.166375	-4.52654	5.99581e-06	8.67786e-05
ENSMUSG00000067148	Polr1c	575.559	-0.603838	0.133413	-4.52608	6.00876e-06	8.68254e-05
ENSMUSG00000029090	Adgra3	355.302	-0.769254	0.170126	-4.52168	6.13512e-06	8.85583e-05
ENSMUSG00000061232	H2-K1	10464.8	0.276707	0.061198	4.52151	6.14008e-06	8.85583e-05
ENSMUSG00000038664	Herc1	1055.5	0.501253	0.110877	4.52081	6.16026e-06	8.87671e-05
ENSMUSG00000021242	Npc2	2536.24	-0.384999	0.0851814	-4.51976	6.19103e-06	8.91279e-05
ENSMUSG00000041460	Cacna2d4	169.932	1.05566	0.233764	4.51594	6.30375e-06	9.06667e-05
ENSMUSG00000019982	Myb	7824.86	0.254881	0.0564485	4.51528	6.32329e-06	9.08637e-05
ENSMUSG00000021413	Prpf4b	4399.25	0.284213	0.06296	4.51419	6.35584e-06	9.1247e-05
ENSMUSG00000036022	Fam122b	317.628	-0.749618	0.166083	-4.51351	6.37622e-06	9.14552e-05
ENSMUSG00000079184	Mphosph8	2193.03	0.355945	0.0788932	4.51173	6.43014e-06	9.21435e-05
ENSMUSG00000034656	Cacna1a	223.915	-1.04712	0.23228	-4.508	6.54414e-06	9.36133e-05
ENSMUSG00000037235	Mxd4	1163.19	0.502933	0.111565	4.50798	6.54474e-06	9.36133e-05
ENSMUSG00000022533	Atp13a3	1336.09	0.428565	0.0951224	4.5054	6.62465e-06	9.46692e-05
ENSMUSG00000014313	Cox6c	4272.76	-0.317664	0.0705444	-4.50303	6.69902e-06	9.56441e-05
ENSMUSG00000031231	Cox7b	3210.48	-0.340837	0.0756972	-4.50263	6.71178e-06	9.57383e-05
ENSMUSG00000037572	Wdhd1	504.858	-0.661569	0.147015	-4.50002	6.79473e-06	9.68328e-05
ENSMUSG00000003814	Calr	3988.17	-0.296507	0.0659013	-4.49926	6.81897e-06	9.70891e-05
ENSMUSG00000035697	Hmha1	4250.12	0.296188	0.0658344	4.49898	6.82789e-06	9.71273e-05
ENSMUSG00000106375	RP23-407I6.4	268.163	-0.927449	0.206202	-4.49778	6.86681e-06	9.75915e-05
ENSMUSG00000003824	Syce2	674.956	-0.528065	0.117542	-4.49258	7.0365e-06	9.98734e-05
ENSMUSG00000073236	2500004C02Rik	132.428	1.21014	0.26937	4.49247	7.04021e-06	9.98734e-05
ENSMUSG00000018379	Srsf1	4418.88	-0.270957	0.060327	-4.49147	7.0733e-06	0.000100251
ENSMUSG00000031068	Glrx3	2005.86	-0.380437	0.0847165	-4.49071	7.09877e-06	0.000100439
ENSMUSG00000069729	Arid1b	1799.82	-0.371767	0.0827864	-4.49068	7.09948e-06	0.000100439
ENSMUSG00000042675	Ypel3	1664.77	0.372957	0.0830704	4.48965	7.13398e-06	0.000100744
ENSMUSG00000052942	Glis3	51.6934	2.08277	0.463901	4.48968	7.13301e-06	0.000100744
ENSMUSG00000029714	Gigyf1	1379	0.460134	0.102553	4.48678	7.2308e-06	0.000102019
ENSMUSG00000037070	Rbmxl1	209.713	-0.982713	0.219169	-4.48382	7.33179e-06	0.00010335
ENSMUSG00000043091	Tuba1c	619.322	-0.609851	0.136023	-4.48344	7.34505e-06	0.000103443
ENSMUSG00000020589	Fam49a	85.0068	-1.53475	0.342624	-4.47941	7.48508e-06	0.000105312
ENSMUSG00000039841	Zfp800	2044.18	0.407152	0.0908977	4.47923	7.49132e-06	0.000105312
ENSMUSG00000029722	Agfg2	822.076	0.559732	0.125016	4.47727	7.56039e-06	0.000106187
ENSMUSG00000028093	Acp6	481.858	0.678576	0.151678	4.4738	7.68428e-06	0.00010783
ENSMUSG00000026778	Prkcq	639.402	0.570148	0.12766	4.46615	7.96386e-06	0.000111652
ENSMUSG00000005233	Spc25	328.98	-0.767351	0.17184	-4.46549	7.98843e-06	0.000111896
ENSMUSG00000025395	Prim1	547.513	-0.620386	0.13894	-4.46515	8.00122e-06	0.000111974
ENSMUSG00000041697	Cox6a1	2688.95	-0.362342	0.0812342	-4.46047	8.17818e-06	0.000114347
ENSMUSG00000022540	Rogdi	61.9741	-1.65391	0.370925	-4.45889	8.2386e-06	0.000115089
ENSMUSG00000021377	Dek	4725.19	-0.334118	0.0749932	-4.45531	8.37725e-06	0.000116921
ENSMUSG00000090602	Gm5611	413.874	-0.738296	0.165734	-4.45471	8.40073e-06	0.000117143
ENSMUSG00000057914	Cacnb2	213.099	-0.941158	0.211437	-4.45124	8.53763e-06	0.000118945
ENSMUSG00000001056	Nhp2	459.782	-0.788903	0.177252	-4.45075	8.55724e-06	0.000119112
ENSMUSG00000027323	Rad51	290.384	-0.795134	0.178696	-4.44964	8.6014e-06	0.000119566
ENSMUSG00000038274	Fau	11380.5	-0.228711	0.0514009	-4.44955	8.60521e-06	0.000119566
ENSMUSG00000064127	Med14	439.071	0.65781	0.148037	4.44355	8.84869e-06	0.000122839
ENSMUSG00000026234	Ncl	12829.4	-0.279687	0.0629456	-4.44331	8.85861e-06	0.000122867
ENSMUSG00000005483	Dnajb1	1070.43	-0.458667	0.103325	-4.43907	9.035e-06	0.000125202
ENSMUSG00000044068	Zrsr1	454.906	0.664307	0.149747	4.43619	9.15671e-06	0.000126775
ENSMUSG00000066362	Rps13-ps1	3598.52	-0.395543	0.0891674	-4.43596	9.16614e-06	0.000126793
ENSMUSG00000025358	Cdk2	617.201	-0.600482	0.135439	-4.43361	9.26703e-06	0.000128074
ENSMUSG00000010608	Rbm25	11046.2	0.242946	0.054852	4.42912	9.46204e-06	0.000130653
ENSMUSG00000022234	Cct5	2172.54	-0.437279	0.0987454	-4.42835	9.49586e-06	0.000131004
ENSMUSG00000025503	Taldo1	2139.34	-0.373511	0.084418	-4.42454	9.66474e-06	0.000133216
ENSMUSG00000064147	Rab44	903.366	-0.569604	0.128749	-4.42414	9.68271e-06	0.000133345
ENSMUSG00000044456	Rin3	210.569	-0.894244	0.202171	-4.4232	9.725e-06	0.000133809
ENSMUSG00000057322	Rpl38	10955.7	-0.263358	0.0596359	-4.41609	1.00502e-05	0.000138162
ENSMUSG00000058392	Rrp1b	1100.16	-0.491031	0.11124	-4.41414	1.01412e-05	0.000139289
ENSMUSG00000022914	Brwd1	732.822	0.52353	0.118665	4.41184	1.02498e-05	0.000140656
ENSMUSG00000045731	Pnoc	15.0198	4.45651	1.01066	4.40948	1.03619e-05	0.000142069
ENSMUSG00000029152	Ociad1	1353.57	-0.409869	0.0930022	-4.40709	1.04768e-05	0.000143519
ENSMUSG00000038384	Setd1b	2344.98	0.32459	0.0736597	4.40661	1.05e-05	0.000143653
ENSMUSG00000040016	Ptger3	16.5114	-4.24696	0.963835	-4.40632	1.05144e-05	0.000143653
ENSMUSG00000051234	Rnf7	516.619	-0.625755	0.142009	-4.40645	1.05078e-05	0.000143653
ENSMUSG00000028862	Map3k6	39.873	-2.27382	0.516216	-4.40479	1.05887e-05	0.000144542
ENSMUSG00000034329	Brip1	516.481	-0.67825	0.15402	-4.40366	1.06438e-05	0.000145167
ENSMUSG00000035277	Arx	1865.2	0.368599	0.0837581	4.40075	1.07876e-05	0.000146999
ENSMUSG00000027170	Eif3m	578.424	-0.656729	0.149249	-4.40022	1.08141e-05	0.000147231
ENSMUSG00000046841	Ckap4	258.243	-0.78698	0.178878	-4.39954	1.08481e-05	0.000147564
ENSMUSG00000084788	Gm11342	193.726	0.919422	0.209074	4.39759	1.0946e-05	0.000148767
ENSMUSG00000045694	Gm4997	466.989	-0.641342	0.145861	-4.39692	1.09797e-05	0.000149093
ENSMUSG00000074476	Spc24	221.968	-1.03805	0.236106	-4.39653	1.09996e-05	0.000149233
ENSMUSG00000039911	Spsb1	29.6637	2.50971	0.571254	4.39334	1.11625e-05	0.000151311
ENSMUSG00000017376	Nlk	727.551	0.534362	0.121651	4.3926	1.12002e-05	0.000151559
ENSMUSG00000052738	Suclg1	1644.55	-0.371639	0.0846037	-4.3927	1.11952e-05	0.000151559
ENSMUSG00000024791	Cdca5	152.654	-1.20701	0.274875	-4.39112	1.1277e-05	0.000152464
ENSMUSG00000027293	Ehd4	392.706	-0.762919	0.173783	-4.39007	1.13314e-05	0.000153067
ENSMUSG00000052040	Klf13	1587.54	0.394307	0.089832	4.38938	1.13677e-05	0.000153424
ENSMUSG00000103774	Gm36932	134.953	1.08542	0.247439	4.38662	1.15126e-05	0.000155245
ENSMUSG00000085667	Gm12992	123.543	1.26427	0.288339	4.38466	1.16168e-05	0.000156514
ENSMUSG00000104432	A430027C01Rik	269.925	0.814484	0.185783	4.38407	1.16482e-05	0.000156802
ENSMUSG00000030007	Cct7	3090.88	-0.299136	0.0682442	-4.38331	1.16888e-05	0.000157212
ENSMUSG00000030677	Kif22	314.911	-0.755305	0.172449	-4.37988	1.18744e-05	0.000159571
ENSMUSG00000027599	Armc1	992.27	-0.45342	0.103585	-4.37727	1.20173e-05	0.000161351
ENSMUSG00000040247	Tbc1d10c	2014.18	0.356464	0.081547	4.37127	1.23528e-05	0.000165713
ENSMUSG00000103594	A430034D21Rik	60.7189	1.77693	0.406523	4.37105	1.23648e-05	0.000165732
ENSMUSG00000038342	Mlxip	701.567	0.539887	0.123571	4.36903	1.24799e-05	0.00016713
ENSMUSG00000059461	Gm7331	2169.64	-0.435108	0.0996092	-4.36815	1.25306e-05	0.000167664
ENSMUSG00000023977	Ubr2	2131.99	0.326461	0.0747448	4.36768	1.25574e-05	0.000167878
ENSMUSG00000005803	Sqrdl	9.60506	6.77447	1.55114	4.36742	1.25725e-05	0.000167936
ENSMUSG00000005763	Cd247	1709.78	0.542463	0.124324	4.36331	1.28107e-05	0.00017097
ENSMUSG00000035235	Trim13	194.708	-0.968219	0.222118	-4.35903	1.30639e-05	0.0001742
ENSMUSG00000027133	Nop10	2047.79	-0.401434	0.0921148	-4.35797	1.31273e-05	0.000174895
ENSMUSG00000039474	Wfs1	39.0545	2.03691	0.467453	4.35747	1.31574e-05	0.000175147
ENSMUSG00000024583	Txnl1	1040.14	-0.480283	0.110228	-4.35719	1.31744e-05	0.000175223
ENSMUSG00000038732	Mboat1	379.388	0.857448	0.1969	4.35473	1.33232e-05	0.00017705
ENSMUSG00000105071	RP24-555M20.3	177.756	-1.08533	0.249331	-4.35297	1.34303e-05	0.000178321
ENSMUSG00000085603	Gm11346	384.304	0.68941	0.158419	4.35181	1.3502e-05	0.00017912
ENSMUSG00000002325	Irf9	634.043	0.568082	0.13057	4.35078	1.35652e-05	0.000179806
ENSMUSG00000040675	Mthfd1l	435.427	-0.667135	0.153473	-4.34691	1.38066e-05	0.000182849
ENSMUSG00000047409	Ctdspl	95.9382	-1.63088	0.375583	-4.34227	1.41019e-05	0.000186601
ENSMUSG00000031262	Cenpi	88.6256	-1.3379	0.308133	-4.34197	1.41208e-05	0.000186692
ENSMUSG00000087523	Gm12319	133.8	1.14652	0.264309	4.33782	1.43902e-05	0.000190093
ENSMUSG00000040229	Gpr34	74.8096	1.60311	0.369776	4.33535	1.4553e-05	0.00019208
ENSMUSG00000026150	Mff	1164.13	-0.437886	0.10106	-4.33294	1.47133e-05	0.00019403
ENSMUSG00000035765	Dym	470.109	-0.633976	0.146325	-4.33266	1.47318e-05	0.00019411
ENSMUSG00000053565	Eif3k	2516.78	-0.322252	0.0743901	-4.33192	1.47815e-05	0.000194601
ENSMUSG00000053553	3110082I17Rik	230.094	-0.968706	0.223647	-4.33141	1.48159e-05	0.000194888
ENSMUSG00000025212	Sfxn3	562.51	0.583413	0.134707	4.33097	1.48452e-05	0.000195108
ENSMUSG00000041112	Elmo1	1302.89	-0.422368	0.0975479	-4.32985	1.49211e-05	0.00019594
ENSMUSG00000026019	Wdr12	1477.02	-0.469299	0.108425	-4.32831	1.50257e-05	0.000197148
ENSMUSG00000022462	Slc38a2	2353.77	-0.322385	0.0745913	-4.32202	1.54607e-05	0.000202513
ENSMUSG00000063439	B9d2	506.947	-0.696668	0.161186	-4.32214	1.54524e-05	0.000202513
ENSMUSG00000044471	Lincpint	95.4811	1.37644	0.318488	4.32179	1.54768e-05	0.000202553
ENSMUSG00000024457	Trim26	262.774	0.783946	0.181455	4.32034	1.55789e-05	0.000203718
ENSMUSG00000036769	Wdr44	147.449	1.42592	0.330068	4.3201	1.55962e-05	0.000203772
ENSMUSG00000017291	Taok1	3494.8	0.33703	0.0780328	4.31908	1.5668e-05	0.000204539
ENSMUSG00000027288	Zfp106	1511.34	-0.386128	0.0894466	-4.31685	1.5827e-05	0.000206441
ENSMUSG00000032384	Csnk1g1	938.16	0.442759	0.10258	4.31624	1.58708e-05	0.000206839
ENSMUSG00000052428	Tmco1	971.75	-0.490541	0.113666	-4.31561	1.59161e-05	0.000207256
ENSMUSG00000020155	Kcnmb1	41.6116	2.00077	0.464181	4.31032	1.63016e-05	0.000211921
ENSMUSG00000020717	Pecam1	1543.2	0.419326	0.0972807	4.31048	1.62903e-05	0.000211921
ENSMUSG00000052676	Zmat1	308.017	0.772634	0.179299	4.30919	1.63851e-05	0.000212828
ENSMUSG00000026987	Baz2b	5686.21	0.335727	0.0779189	4.30868	1.64233e-05	0.000212968
ENSMUSG00000051359	Ncald	103.918	1.31646	0.305534	4.30873	1.64191e-05	0.000212968
ENSMUSG00000061143	Maml3	1588.1	0.429203	0.0996337	4.30781	1.64882e-05	0.000213632
ENSMUSG00000022322	Shcbp1	123.491	-1.1669	0.270913	-4.30728	1.65273e-05	0.000213961
ENSMUSG00000036309	Skp1a	3596.19	-0.317436	0.0737161	-4.3062	1.66083e-05	0.000214831
ENSMUSG00000021891	Mettl6	729.376	0.546942	0.12719	4.30018	1.70657e-05	0.000220564
ENSMUSG00000004319	Clcn3	910.031	0.677287	0.157547	4.29894	1.71614e-05	0.000221616
ENSMUSG00000090553	Snrpe	2491.28	-0.356987	0.0830658	-4.29764	1.72629e-05	0.000222741
ENSMUSG00000044150	A830080D01Rik	569.071	-0.597605	0.139186	-4.29358	1.75819e-05	0.000226669
ENSMUSG00000052812	Atad2b	1223.58	0.394294	0.0918703	4.29185	1.7719e-05	0.000228248
ENSMUSG00000057649	Brd9	922.776	0.444162	0.103497	4.29153	1.77445e-05	0.000228386
ENSMUSG00000028478	Clta	2221.97	-0.322568	0.0751998	-4.28948	1.79093e-05	0.000230317
ENSMUSG00000021040	Slirp	947.769	-0.497138	0.115905	-4.2892	1.7932e-05	0.000230419
ENSMUSG00000019689	1110001J03Rik	623.442	-0.58106	0.135515	-4.28778	1.80467e-05	0.000231701
ENSMUSG00000022439	Parvg	1973.44	-0.483303	0.112746	-4.28664	1.81397e-05	0.000232703
ENSMUSG00000004040	Stat3	3166.32	-0.295445	0.0690121	-4.28106	1.86006e-05	0.000238419
ENSMUSG00000024043	Arhgap28	18.5279	-3.45807	0.808359	-4.27789	1.88673e-05	0.000241439
ENSMUSG00000037876	Jmjd1c	1927.53	0.353084	0.0825368	4.2779	1.88669e-05	0.000241439
ENSMUSG00000020455	Trim11	947.865	0.428325	0.100184	4.27539	1.90805e-05	0.000243966
ENSMUSG00000006800	Sulf2	189.859	-0.93599	0.219032	-4.2733	1.92604e-05	0.000246065
ENSMUSG00000039753	Fbxl5	412.563	0.891464	0.208657	4.27238	1.93399e-05	0.000246877
ENSMUSG00000097971	Gm26917	1094.66	-0.508776	0.119103	-4.27172	1.93969e-05	0.000247401
ENSMUSG00000028633	Ctps	173.584	-0.973878	0.228122	-4.26911	1.96253e-05	0.00025011
ENSMUSG00000031311	Nono	2845.34	-0.315003	0.0737904	-4.26888	1.96453e-05	0.00025016
ENSMUSG00000042354	Gnl3	2003.99	-0.376342	0.0881795	-4.26791	1.97315e-05	0.000251051
ENSMUSG00000004609	Cd33	30.9155	-2.38489	0.558888	-4.2672	1.97945e-05	0.000251236
ENSMUSG00000039159	Ube2h	1391.91	0.47205	0.110622	4.26723	1.97916e-05	0.000251236
ENSMUSG00000085795	Zfp703	195.464	-0.87932	0.20606	-4.26731	1.97845e-05	0.000251236
ENSMUSG00000022673	Mcm4	1297.56	-0.50058	0.117352	-4.26562	1.99348e-05	0.00025281
ENSMUSG00000018442	Derl2	607.823	0.540035	0.126622	4.26494	1.99956e-05	0.000253376
ENSMUSG00000034422	Parp14	601.927	0.612222	0.143596	4.26349	2.01258e-05	0.000254817
ENSMUSG00000026594	Ralgps2	1946.94	0.428439	0.100585	4.25948	2.04901e-05	0.000259219
ENSMUSG00000035236	Scai	509.624	0.571164	0.134347	4.25141	2.12431e-05	0.000268526
ENSMUSG00000059456	Ptk2b	625.734	-0.646084	0.152049	-4.24917	2.14561e-05	0.000270999
ENSMUSG00000032294	Pkm	2638.4	-0.419518	0.0987792	-4.24702	2.16629e-05	0.000273388
ENSMUSG00000063239	Grm4	89.2481	-1.29314	0.304599	-4.24539	2.18215e-05	0.000275167
ENSMUSG00000058761	Rnf169	865.735	0.484919	0.114285	4.24307	2.20483e-05	0.000277801
ENSMUSG00000022021	Diap3	306.058	-0.724579	0.170811	-4.242	2.21541e-05	0.000278909
ENSMUSG00000078671	Chd2	3021.71	0.354132	0.0834984	4.24119	2.22341e-05	0.000279689
ENSMUSG00000062248	Cks2	336.338	-0.813666	0.191861	-4.24092	2.22604e-05	0.000279793
ENSMUSG00000028896	Rcc1	534.768	-0.809607	0.190926	-4.24043	2.23095e-05	0.000280185
ENSMUSG00000105199	RP23-38L11.1	128.813	-1.13696	0.268164	-4.2398	2.23721e-05	0.000280744
ENSMUSG00000002797	Ggct	110.714	-1.1921	0.281391	-4.23644	2.27095e-05	0.000284748
ENSMUSG00000087107	AI662270	6931.29	-0.260614	0.0615821	-4.23197	2.3165e-05	0.000290225
ENSMUSG00000023828	Slc22a3	147.889	-1.02842	0.243039	-4.2315	2.32135e-05	0.000290599
ENSMUSG00000029338	Antxr2	66.5425	-1.69616	0.401847	-4.22091	2.43321e-05	0.000304357
ENSMUSG00000041133	Smc1a	5237.43	-0.265821	0.0630287	-4.21746	2.47072e-05	0.0003088
ENSMUSG00000033732	Sf3b3	912.345	-0.425362	0.100953	-4.21347	2.5148e-05	0.000314057
ENSMUSG00000084771	A230072E10Rik	45.3944	1.86295	0.442707	4.2081	2.57532e-05	0.000321357
ENSMUSG00000064348	mt-Tn	166.073	-0.93315	0.221815	-4.20688	2.58919e-05	0.000322828
ENSMUSG00000086782	E130102H24Rik	149.171	1.02609	0.243943	4.20626	2.59631e-05	0.000323457
ENSMUSG00000002500	Rpl3l	153.155	0.979466	0.232877	4.20593	2.6001e-05	0.000323669
ENSMUSG00000029657	Hsph1	373.083	-0.864952	0.205789	-4.20311	2.63272e-05	0.000326945
ENSMUSG00000032496	Ltf	23.2398	2.91128	0.692642	4.20315	2.63224e-05	0.000326945
ENSMUSG00000053510	Nrd1	1089.27	0.452021	0.107541	4.20326	2.63103e-05	0.000326945
ENSMUSG00000028884	Rpa2	1187.96	-0.448964	0.10687	-4.20104	2.65692e-05	0.000329687
ENSMUSG00000019920	Lims1	1406.84	-0.406486	0.0968151	-4.19859	2.68587e-05	0.000333013
ENSMUSG00000048000	Gigyf2	982.248	0.423963	0.101003	4.19754	2.69835e-05	0.000334294
ENSMUSG00000024034	Tmprss3	40.5292	-2.01298	0.479867	-4.19486	2.73038e-05	0.000337993
ENSMUSG00000049932	H2afx	1021.53	-0.467875	0.11163	-4.19131	2.77343e-05	0.000342776
ENSMUSG00000097176	Gm26830	121.027	1.12807	0.269143	4.19135	2.77296e-05	0.000342776
ENSMUSG00000008318	Relt	91.3862	-1.29981	0.310815	-4.18194	2.89032e-05	0.000356939
ENSMUSG00000096054	Syne1	224.928	0.8428	0.201598	4.1806	2.90745e-05	0.00035877
ENSMUSG00000097882	0610038B21Rik	58.7264	1.66422	0.398174	4.17964	2.91972e-05	0.000359998
ENSMUSG00000026553	Copa	2621.54	-0.346798	0.0829882	-4.17888	2.92951e-05	0.00036092
ENSMUSG00000043439	E130012A19Rik	152.401	-0.992885	0.237613	-4.17857	2.93343e-05	0.000361116
ENSMUSG00000037685	Atp8a1	1594.83	0.529597	0.126972	4.17099	3.03285e-05	0.000373059
ENSMUSG00000032841	Prr5l	21.3027	3.18449	0.764072	4.16779	3.07564e-05	0.000378024
ENSMUSG00000020899	Pfas	373.989	-0.666103	0.159849	-4.16709	3.08513e-05	0.00037889
ENSMUSG00000062604	Srpk2	3590.94	0.299986	0.0720676	4.16256	3.14706e-05	0.000386192
ENSMUSG00000087233	4930594C11Rik	58.9183	1.63852	0.393989	4.1588	3.19928e-05	0.000392291
ENSMUSG00000030747	Dgat2	14.5575	4.40411	1.05915	4.15814	3.20843e-05	0.000393102
ENSMUSG00000056201	Cfl1	6018.94	-0.33054	0.079499	-4.15779	3.21336e-05	0.000393396
ENSMUSG00000021453	Gadd45g	141.226	1.04503	0.251373	4.1573	3.22031e-05	0.000393885
ENSMUSG00000084992	Gm13842	60.5683	-1.74115	0.418833	-4.15715	3.22242e-05	0.000393885
ENSMUSG00000028528	Dnajc6	362.743	0.642094	0.154568	4.15413	3.26522e-05	0.000398803
ENSMUSG00000038538	Ubn2	2658.23	0.32107	0.0773037	4.15337	3.27619e-05	0.000399828
ENSMUSG00000021585	Cast	489.272	0.664246	0.159988	4.15184	3.29809e-05	0.000402186
ENSMUSG00000048154	Kmt2d	1450.02	0.361714	0.0871386	4.15102	3.30998e-05	0.000403319
ENSMUSG00000005142	Man2b1	1278.42	-0.469323	0.113095	-4.1498	3.32765e-05	0.000404522
ENSMUSG00000044447	Dock5	123.662	-1.14401	0.275666	-4.14999	3.32491e-05	0.000404522
ENSMUSG00000069565	Dazap1	1576.37	-0.349461	0.0842107	-4.14984	3.32707e-05	0.000404522
ENSMUSG00000090733	Rps27	7802.48	-0.290071	0.0699092	-4.14925	3.33569e-05	0.000405183
ENSMUSG00000072663	Spef2	93.4147	1.31445	0.316837	4.14865	3.34438e-05	0.00040592
ENSMUSG00000056305	Usp39	312.911	-0.71949	0.173477	-4.14746	3.36183e-05	0.000407721
ENSMUSG00000024785	Rcl1	910.847	-0.432383	0.104311	-4.14514	3.39606e-05	0.000411231
ENSMUSG00000037287	Tbcel	1066.83	0.43155	0.104106	4.14529	3.39389e-05	0.000411231
ENSMUSG00000069439	Gm8444	88.7486	-1.28728	0.310611	-4.14436	3.40759e-05	0.000412305
ENSMUSG00000045414	1190002N15Rik	347.33	0.683135	0.164936	4.14183	3.4455e-05	0.000416567
ENSMUSG00000037447	Arid5a	925.793	0.420526	0.101548	4.14114	3.45585e-05	0.000417495
ENSMUSG00000005883	Spo11	174.154	1.00773	0.243672	4.13558	3.54058e-05	0.000427399
ENSMUSG00000042682	Selk	1234.5	-0.409278	0.0990345	-4.13268	3.58558e-05	0.000432494
ENSMUSG00000102374	Gm38387	128.763	1.33916	0.324497	4.12687	3.67728e-05	0.000443212
ENSMUSG00000015437	Gzmb	1711.89	-0.498006	0.120686	-4.12645	3.68412e-05	0.000443692
ENSMUSG00000035762	Tmem161b	528.846	0.564508	0.136838	4.12536	3.70151e-05	0.000445442
ENSMUSG00000048874	Phf3	2356.83	0.332829	0.0807046	4.12404	3.7229e-05	0.00044767
ENSMUSG00000027454	Gins1	181.376	-1.01225	0.245486	-4.12345	3.73236e-05	0.000448114
ENSMUSG00000079065	BC005561	1140.43	0.433736	0.105187	4.12349	3.7318e-05	0.000448114
ENSMUSG00000051355	Commd1	246.492	-0.771802	0.187415	-4.11815	3.81929e-05	0.000458197
ENSMUSG00000024334	H2-Oa	140.054	1.14133	0.277172	4.11779	3.82529e-05	0.000458563
ENSMUSG00000032580	Rbm5	3028.78	0.346325	0.0841745	4.11436	3.88249e-05	0.000465061
ENSMUSG00000025574	Tk1	438.211	-0.629443	0.153199	-4.10866	3.97967e-05	0.000476335
ENSMUSG00000024235	Map3k8	258.087	0.850271	0.207053	4.10653	4.01646e-05	0.000480251
ENSMUSG00000056531	Ccdc18	768.925	0.546014	0.132966	4.10641	4.01857e-05	0.000480251
ENSMUSG00000040093	Bmf	136.103	1.21124	0.295071	4.10491	4.0447e-05	0.000482632
ENSMUSG00000074629	4930518I15Rik	137.239	1.05965	0.258139	4.10496	4.0439e-05	0.000482632
ENSMUSG00000005672	Kit	3134.98	-0.304506	0.0741908	-4.10437	4.0542e-05	0.000483395
ENSMUSG00000032582	Rbm6	1699.98	0.329695	0.0803856	4.10141	4.10635e-05	0.000488864
ENSMUSG00000054309	Cpsf3	848.325	-0.542734	0.132328	-4.10143	4.10613e-05	0.000488864
ENSMUSG00000107336	RP24-544J6.5	82.2571	1.48279	0.361675	4.09979	4.13526e-05	0.000491928
ENSMUSG00000020886	Dlg4	177.816	0.896452	0.218816	4.09684	4.18832e-05	0.000497479
ENSMUSG00000030647	Ndufc2	1977.73	-0.323652	0.078999	-4.09692	4.18691e-05	0.000497479
ENSMUSG00000020978	Klhdc2	770.575	-0.501382	0.122414	-4.09579	4.20739e-05	0.000499362
ENSMUSG00000020741	Cluh	711.629	-0.545505	0.133227	-4.09456	4.22965e-05	0.000501621
ENSMUSG00000033047	Eif3l	1494.38	-0.388628	0.0949368	-4.09355	4.2482e-05	0.000503437
ENSMUSG00000002014	Ssr4	2014.97	-0.332614	0.0812912	-4.09163	4.28346e-05	0.000506844
ENSMUSG00000075270	Pde11a	100.171	1.25292	0.306211	4.09169	4.28239e-05	0.000506844
ENSMUSG00000025144	Stra13	175.128	-1.02754	0.251335	-4.08833	4.34494e-05	0.000513337
ENSMUSG00000055762	Eef1d	1689.29	-0.343587	0.0840385	-4.08845	4.34261e-05	0.000513337
ENSMUSG00000095588	Gm12350	422.432	-0.6816	0.166799	-4.08637	4.38183e-05	0.000517302
ENSMUSG00000103515	9330133O14Rik	213.788	0.993143	0.243109	4.08517	4.40437e-05	0.000519569
ENSMUSG00000026919	Lcn4	327.028	-0.901319	0.220668	-4.08451	4.41706e-05	0.000520671
ENSMUSG00000052087	Rgs14	60.8632	1.57613	0.386012	4.08312	4.44345e-05	0.000523385
ENSMUSG00000026728	Vim	4012.41	0.304452	0.074568	4.08287	4.44823e-05	0.000523551
ENSMUSG00000028159	Dapp1	1475.75	-0.358563	0.0878269	-4.08262	4.45317e-05	0.000523736
ENSMUSG00000040747	Cd53	2353.34	0.447017	0.109498	4.08242	4.45695e-05	0.000523784
ENSMUSG00000026974	Zmynd19	255.352	-0.731952	0.179303	-4.0822	4.46111e-05	0.000523877
ENSMUSG00000031843	Mphosph6	368.056	-0.654968	0.160476	-4.0814	4.47649e-05	0.000525287
ENSMUSG00000040658	Dnph1	80.8573	-1.35271	0.331735	-4.07767	4.54887e-05	0.000533377
ENSMUSG00000035268	Pkig	231.694	-0.770481	0.189007	-4.07647	4.5725e-05	0.000535744
ENSMUSG00000039671	Zmynd8	3245.52	0.26998	0.0663374	4.0698	4.7054e-05	0.0005509
ENSMUSG00000079339	Gm14446	222.585	0.849399	0.208726	4.06946	4.71232e-05	0.000551296
ENSMUSG00000030451	Herc2	1541.33	0.376457	0.0925159	4.0691	4.71941e-05	0.00055171
ENSMUSG00000006715	Gmnn	341.592	-0.718502	0.176662	-4.0671	4.76015e-05	0.000556054
ENSMUSG00000106926	RP23-151G22.1	2337.68	-0.420285	0.10338	-4.06543	4.79432e-05	0.000559625
ENSMUSG00000031683	Lsm6	1140.94	-0.388454	0.0955743	-4.06442	4.8152e-05	0.000561641
ENSMUSG00000072620	Slfn2	661.19	0.63304	0.155786	4.06353	4.83359e-05	0.000563363
ENSMUSG00000033610	Pank1	369.531	-0.758142	0.186629	-4.0623	4.85909e-05	0.000565911
ENSMUSG00000054520	Sh3bp2	108.423	-1.42431	0.350697	-4.06138	4.87829e-05	0.000567722
ENSMUSG00000034845	Plvap	14.8975	-4.079	1.00525	-4.05767	4.95638e-05	0.000576378
ENSMUSG00000009876	Cox4i2	18.3639	-3.63282	0.895352	-4.05742	4.96175e-05	0.000576572
ENSMUSG00000027544	Nfatc2	374.854	0.767417	0.189255	4.05495	5.01458e-05	0.000582276
ENSMUSG00000050377	Il31ra	138.946	-1.31025	0.323246	-4.0534	5.04779e-05	0.000585695
ENSMUSG00000044770	Scml4	120.994	1.21836	0.30069	4.05187	5.08101e-05	0.000589109
ENSMUSG00000076902	Traj27	7.78062	6.48059	1.60035	4.04948	5.13322e-05	0.000594719
ENSMUSG00000026835	Fcnb	15.2462	4.12567	1.01961	4.04632	5.2029e-05	0.000602191
ENSMUSG00000074071	Fam169b	674.015	0.600407	0.148388	4.04621	5.20546e-05	0.000602191
ENSMUSG00000057596	Trim30d	302.627	0.714272	0.176552	4.04568	5.21715e-05	0.000603095
ENSMUSG00000000631	Myo18a	1020.25	0.446445	0.110573	4.03757	5.40081e-05	0.000623862
ENSMUSG00000032349	Elovl5	2513.88	0.304505	0.0754854	4.03396	5.48439e-05	0.000633046
ENSMUSG00000037419	Endod1	91.9752	-1.36227	0.337953	-4.03094	5.55553e-05	0.000640782
ENSMUSG00000036918	Ttc7	599.242	-0.496639	0.123233	-4.03008	5.57573e-05	0.000642608
ENSMUSG00000047193	Dync2h1	831.809	0.47293	0.117355	4.02992	5.57963e-05	0.000642608
ENSMUSG00000030337	Vamp1	473.817	0.671262	0.166617	4.02877	5.60688e-05	0.000645268
ENSMUSG00000002033	Cd3g	2372.64	1.21257	0.301067	4.02758	5.63542e-05	0.000647641
ENSMUSG00000048924	Ccdc125	418.178	0.601393	0.149319	4.02756	5.63583e-05	0.000647641
ENSMUSG00000075330	A930003A15Rik	589.434	0.634833	0.157698	4.02562	5.68244e-05	0.000652516
ENSMUSG00000015605	Srf	638.083	-0.623788	0.155144	-4.02069	5.80272e-05	0.000665836
ENSMUSG00000022246	Rai14	44.9023	-1.86079	0.462885	-4.01999	5.81994e-05	0.000667319
ENSMUSG00000024579	Pcyox1l	286.98	-0.818684	0.203676	-4.01954	5.83128e-05	0.000668127
ENSMUSG00000029655	N4bp2l2	1537.27	0.345711	0.086014	4.01923	5.83877e-05	0.000668491
ENSMUSG00000024208	Uqcc2	386.377	-0.666034	0.165841	-4.01611	5.91669e-05	0.000676915
ENSMUSG00000045969	Ing1	2778.31	0.330266	0.0822626	4.01478	5.95021e-05	0.00067975
ENSMUSG00000060019	Gm10073	112.196	-1.09824	0.273548	-4.01481	5.94938e-05	0.00067975
ENSMUSG00000027752	Exosc8	602.401	-0.573287	0.142884	-4.01226	6.01409e-05	0.000686543
ENSMUSG00000038055	Dexi	611.727	0.568864	0.141815	4.0113	6.03864e-05	0.000688839
ENSMUSG00000005161	Prdx2	2861.38	-0.282752	0.0705086	-4.01018	6.06726e-05	0.000691596
ENSMUSG00000030162	Olr1	17.6885	3.82677	0.954393	4.00963	6.08127e-05	0.000692686
ENSMUSG00000020918	Kat2a	405.717	0.603996	0.150667	4.00883	6.10211e-05	0.000694276
ENSMUSG00000051517	Arhgef39	178.581	-0.941062	0.234752	-4.00875	6.10416e-05	0.000694276
ENSMUSG00000017830	Dhx58	147.298	1.09383	0.272885	4.00839	6.11329e-05	0.000694805
ENSMUSG00000053317	Sec61b	3281.93	-0.325213	0.0811369	-4.0082	6.11829e-05	0.000694867
ENSMUSG00000054823	Whsc1l1	2200.1	0.345829	0.0862897	4.00777	6.1295e-05	0.000695632
ENSMUSG00000074024	4632427E13Rik	914.02	0.431748	0.107785	4.00564	6.18506e-05	0.000701424
ENSMUSG00000050002	Idnk	385.358	0.600366	0.149892	4.00532	6.19333e-05	0.00070185
ENSMUSG00000026773	Pfkfb3	527.993	-0.676518	0.168943	-4.00441	6.21717e-05	0.000703767
ENSMUSG00000080775	Gm6368	580.487	-0.586758	0.146536	-4.00418	6.22317e-05	0.000703767
ENSMUSG00000097589	Dleu2	502.049	0.628101	0.156862	4.00416	6.22382e-05	0.000703767
ENSMUSG00000019726	Lyst	230.373	0.874773	0.218531	4.00298	6.25504e-05	0.000706783
ENSMUSG00000059775	Rps26-ps1	144.472	-1.03344	0.258244	-4.0018	6.28636e-05	0.000709807
ENSMUSG00000049036	Tmem121	744.354	0.526567	0.131602	4.00121	6.30191e-05	0.000711046
ENSMUSG00000032712	2810474O19Rik	5175.32	0.269951	0.0674718	4.00095	6.30897e-05	0.000711326
ENSMUSG00000102142	Gm26930	981.208	0.51225	0.128043	4.00061	6.31792e-05	0.000711819
ENSMUSG00000022848	Dirc2	21.4603	3.22158	0.806105	3.99648	6.42922e-05	0.00072331
ENSMUSG00000026110	Mgat4a	896.841	0.448588	0.112241	3.99664	6.42482e-05	0.00072331
ENSMUSG00000037111	Setd7	1368.22	0.381622	0.095504	3.99588	6.44557e-05	0.000724626
ENSMUSG00000103085	Gm38120	286.528	0.707786	0.17716	3.99519	6.46423e-05	0.000726199
ENSMUSG00000021102	Glrx5	1005.22	-0.423796	0.106086	-3.99482	6.47434e-05	0.000726809
ENSMUSG00000065750	Gm23346	40.8032	2.04262	0.511635	3.99234	6.54231e-05	0.00073391
ENSMUSG00000023994	Nfya	257.6	-0.778087	0.194971	-3.99079	6.58547e-05	0.000738218
ENSMUSG00000004837	Grap	342.918	0.673328	0.168733	3.9905	6.59355e-05	0.000738592
ENSMUSG00000027502	Rtfdc1	902.326	0.425986	0.106765	3.98995	6.60883e-05	0.00073977
ENSMUSG00000068243	Gm7079	756.152	-0.599412	0.150364	-3.9864	6.70835e-05	0.000750369
ENSMUSG00000015176	Nolc1	1311.68	-0.362919	0.0910546	-3.98573	6.72723e-05	0.000751941
ENSMUSG00000071379	Hpcal1	710.502	0.490716	0.123153	3.98461	6.759e-05	0.000754949
ENSMUSG00000021048	Mthfd1	388.751	-0.627441	0.1575	-3.98375	6.78368e-05	0.000757161
ENSMUSG00000020516	Rps6kb1	1449.1	0.372825	0.0936113	3.9827	6.81378e-05	0.000759976
ENSMUSG00000027475	Kif3b	601.554	0.519705	0.130569	3.98031	6.88245e-05	0.000766536
ENSMUSG00000102600	Gm37266	140.568	1.20766	0.303407	3.98033	6.88185e-05	0.000766536
ENSMUSG00000020277	Pfkl	511.56	-0.693423	0.17437	-3.97673	6.98697e-05	0.000777619
ENSMUSG00000022272	Myo10	490.748	0.618977	0.155705	3.97532	7.02842e-05	0.000781673
ENSMUSG00000026155	Smap1	646.441	0.469359	0.118127	3.97335	7.08678e-05	0.000787601
ENSMUSG00000052146	Rps10	8723.29	-0.229979	0.0578945	-3.97239	7.11556e-05	0.000790108
ENSMUSG00000078920	Ifi47	1670.6	0.392688	0.0988576	3.97226	7.11951e-05	0.000790108
ENSMUSG00000024521	Pmaip1	147.294	-0.957291	0.241151	-3.96967	7.19719e-05	0.000798159
ENSMUSG00000072618	Gm10384	298.956	-0.673936	0.170037	-3.96345	7.38731e-05	0.00081866
ENSMUSG00000024795	Kif20b	1344.02	-0.409845	0.103434	-3.9624	7.41991e-05	0.000821686
ENSMUSG00000020840	Blmh	988.653	-0.401678	0.101388	-3.9618	7.43877e-05	0.000823188
ENSMUSG00000046532	Ar	119.212	1.14408	0.289024	3.95843	7.54427e-05	0.000834269
ENSMUSG00000059005	Hnrnpa3	968.561	-0.455309	0.115174	-3.95323	7.71043e-05	0.000852038
ENSMUSG00000037169	Mycn	182.553	-1.15128	0.291367	-3.9513	7.77291e-05	0.000858332
ENSMUSG00000058290	Espl1	175.302	-0.932203	0.235939	-3.95104	7.78127e-05	0.000858646
ENSMUSG00000042590	Ipo11	444.593	-0.601987	0.152435	-3.94914	7.84309e-05	0.000864854
ENSMUSG00000030346	Rad51ap1	280.522	-0.831909	0.210774	-3.94692	7.91633e-05	0.000872311
ENSMUSG00000026032	Ndufb3	1946.89	-0.351848	0.0891956	-3.94468	7.99082e-05	0.000879685
ENSMUSG00000068606	Gm4841	16.1514	3.67839	0.932522	3.94456	7.99456e-05	0.000879685
ENSMUSG00000030720	Cln3	456.368	0.618166	0.156749	3.94368	8.02416e-05	0.000882317
ENSMUSG00000107320	RP23-23C4.5	349.815	0.720801	0.182882	3.94134	8.10263e-05	0.000890316
ENSMUSG00000056708	Ier5	522.53	-0.531696	0.134943	-3.94015	8.14319e-05	0.00089414
ENSMUSG00000048058	Ldlrad3	81.2253	-1.30148	0.330862	-3.9336	8.36831e-05	0.000918211
ENSMUSG00000029204	Rhoh	1732.87	0.356608	0.0907012	3.93168	8.43538e-05	0.000924917
ENSMUSG00000030062	Rpn1	2155.59	-0.328756	0.0836235	-3.93138	8.4458e-05	0.000925407
ENSMUSG00000029363	Rfc5	339.392	-0.626797	0.159443	-3.93115	8.45388e-05	0.000925641
ENSMUSG00000002129	Sf3a1	936.637	-0.408656	0.104001	-3.92935	8.51756e-05	0.000931956
ENSMUSG00000048612	Myof	482.506	0.554008	0.141089	3.92666	8.6132e-05	0.000941759
ENSMUSG00000017843	Ppp2r5c	2268.33	0.286142	0.0728912	3.92561	8.65109e-05	0.000945236
ENSMUSG00000024349	Tmem173	973.446	-0.434035	0.110572	-3.92535	8.66039e-05	0.000945588
ENSMUSG00000062866	Phactr2	205.022	-0.836996	0.213241	-3.92512	8.66876e-05	0.000945838
ENSMUSG00000056938	Acbd4	104.851	1.12825	0.287472	3.92472	8.68313e-05	0.000946741
ENSMUSG00000026219	Trip12	2532.16	0.3371	0.0858952	3.92454	8.68944e-05	0.000946765
ENSMUSG00000066677	Pydc3	75.7593	1.48284	0.378232	3.92045	8.83834e-05	0.000962315
ENSMUSG00000002728	Naa20	488.841	0.583572	0.148958	3.91768	8.94045e-05	0.000971392
ENSMUSG00000031985	Gnpat	576.944	-0.553291	0.141223	-3.91785	8.93418e-05	0.000971392
ENSMUSG00000037321	Tap1	1167.72	0.390529	0.0996796	3.91784	8.93463e-05	0.000971392
ENSMUSG00000028212	Ccne2	247.549	-0.76695	0.195838	-3.91625	8.9938e-05	0.000976506
ENSMUSG00000005506	Celf1	2910.59	0.27201	0.0694706	3.91547	9.02272e-05	0.000978962
ENSMUSG00000054364	Rhob	136.039	-0.939147	0.23992	-3.91442	9.06204e-05	0.000982542
ENSMUSG00000025959	Klf7	646.225	0.461643	0.11799	3.91257	9.13199e-05	0.000989437
ENSMUSG00000001767	Crnkl1	847.683	0.41074	0.104988	3.91227	9.1432e-05	0.000989962
ENSMUSG00000021115	Vrk1	949.428	-0.426088	0.108942	-3.91114	9.18615e-05	0.000992538
ENSMUSG00000031858	Mau2	716.837	0.458863	0.117321	3.91117	9.18513e-05	0.000992538
ENSMUSG00000039783	Kmo	57.0509	-1.67343	0.427832	-3.91142	9.1756e-05	0.000992538
ENSMUSG00000073102	Drc1	83.5868	1.40288	0.358708	3.91092	9.19435e-05	0.000992734
ENSMUSG00000020782	Llgl2	19.7378	2.71634	0.694763	3.90973	9.23991e-05	0.000996961
ENSMUSG00000001416	Cct3	2096.37	-0.357412	0.0914648	-3.90765	9.31976e-05	0.00100488
ENSMUSG00000060992	Copz1	1549.73	-0.364296	0.0932373	-3.9072	9.33734e-05	0.00100608
ENSMUSG00000039158	Akna	402.768	-0.599802	0.153528	-3.90679	9.35307e-05	0.00100707
ENSMUSG00000024240	Epc1	844.47	0.410694	0.105148	3.90587	9.38889e-05	0.00101023
ENSMUSG00000027374	Mrps5	952.142	0.4186	0.107225	3.90393	9.46418e-05	0.00101763
ENSMUSG00000058318	Phf21a	1422.47	0.36547	0.093642	3.90284	9.507e-05	0.00102153
ENSMUSG00000056342	Usp34	2503.65	0.294171	0.0753826	3.90238	9.52527e-05	0.00102278
ENSMUSG00000026639	Lamb3	174.859	0.827607	0.212097	3.90201	9.53967e-05	0.00102362
ENSMUSG00000097583	6430590A07Rik	240.608	0.780977	0.200157	3.90181	9.54751e-05	0.00102376
ENSMUSG00000022336	Eif3e	3663.23	-0.282518	0.0724154	-3.90135	9.56563e-05	0.00102402
ENSMUSG00000064372	mt-Tp	2547.57	0.411032	0.105359	3.90125	9.56974e-05	0.00102402
ENSMUSG00000104388	Gm37033	482.295	0.57743	0.148005	3.90143	9.56271e-05	0.00102402
ENSMUSG00000030142	Clec4e	375.392	-0.627624	0.160951	-3.89947	9.6405e-05	0.00103088
ENSMUSG00000042605	Atxn2	884.713	0.422604	0.108388	3.89898	9.65979e-05	0.00103224
ENSMUSG00000085028	Slc2a4rg-ps	179.769	0.955373	0.245065	3.89844	9.68147e-05	0.00103384
ENSMUSG00000018340	Anxa6	2212.79	0.332176	0.085257	3.89618	9.7723e-05	0.00104283
ENSMUSG00000013663	Pten	3400.54	0.256099	0.0657792	3.89331	9.88848e-05	0.0010545
ENSMUSG00000040296	Ddx58	467.148	0.590083	0.151605	3.89225	9.93181e-05	0.0010584
ENSMUSG00000028664	Ephb2	438.288	-0.584265	0.150126	-3.89184	9.94868e-05	0.00105947
ENSMUSG00000056413	Adap1	34.9419	-2.17595	0.559133	-3.89165	9.95641e-05	0.00105956
ENSMUSG00000041297	Cdk13	948.945	0.439029	0.112844	3.89059	0.0001	0.00106275
ENSMUSG00000052539	Magi3	436.566	0.590524	0.151776	3.89075	9.99344e-05	0.00106275
ENSMUSG00000034663	Bmp2k	1228.24	-0.450609	0.115827	-3.89035	0.000100098	0.00106307
ENSMUSG00000032040	Dcps	465.188	-0.719575	0.185063	-3.88827	0.000100961	0.00107149
ENSMUSG00000096199	Ptrhd1	201.151	-0.859161	0.221006	-3.8875	0.000101283	0.00107418
ENSMUSG00000023367	Tmem176a	575.154	0.555482	0.142921	3.88663	0.000101644	0.00107727
ENSMUSG00000084349	Rpl3-ps1	1990.83	-0.82087	0.211265	-3.8855	0.000102117	0.00108155
ENSMUSG00000012889	Podnl1	267.657	0.819087	0.210822	3.88522	0.000102239	0.00108211
ENSMUSG00000026223	Itm2c	604.373	0.499612	0.128615	3.88455	0.000102522	0.00108436
ENSMUSG00000030557	Mef2a	467.984	0.573765	0.147719	3.88416	0.000102684	0.00108533
ENSMUSG00000095620	2010005H15Rik	6.84495	6.2892	1.61979	3.88272	0.000103296	0.00109106
ENSMUSG00000042210	Abhd14a	86.4882	-1.25277	0.322898	-3.87978	0.00010455	0.00110355
ENSMUSG00000033379	Atp6v0b	528.54	-0.551944	0.142281	-3.87924	0.000104783	0.00110527
ENSMUSG00000047361	Gm973	16.4743	3.56066	0.917947	3.87893	0.000104916	0.00110592
ENSMUSG00000032413	Rasa2	394.867	0.563631	0.145322	3.87849	0.000105108	0.00110719
ENSMUSG00000022587	Ly6e	7900.76	0.270515	0.0697519	3.87824	0.000105215	0.00110757
ENSMUSG00000037674	Rfx7	2717.72	0.372977	0.0963369	3.87159	0.000108129	0.00113747
ENSMUSG00000055612	Cdca7	497.385	-0.562884	0.145396	-3.87138	0.000108222	0.00113768
ENSMUSG00000034168	Irf2bpl	268.063	0.776136	0.200588	3.8693	0.000109149	0.00114665
ENSMUSG00000031513	Leprotl1	1189.42	0.381638	0.0986697	3.86783	0.000109806	0.00115278
ENSMUSG00000002625	Akap8l	580.794	0.495346	0.12815	3.86536	0.000110926	0.00116375
ENSMUSG00000004880	Lbr	512.603	0.619356	0.160266	3.86455	0.000111294	0.00116683
ENSMUSG00000035064	Eef2k	2684.35	0.26858	0.0695174	3.8635	0.000111775	0.00117107
ENSMUSG00000072621	Slfn10-ps	902.518	0.43496	0.112596	3.86302	0.000111995	0.00117259
ENSMUSG00000030662	Ipo5	799.029	-0.459684	0.119018	-3.86231	0.000112322	0.00117522
ENSMUSG00000032599	Ip6k2	876.882	0.470164	0.121845	3.8587	0.000113991	0.00119108
ENSMUSG00000041515	Irf8	152.702	-1.09836	0.284641	-3.85875	0.000113966	0.00119108
ENSMUSG00000051343	Rab11fip5	38.9132	-2.37668	0.616003	-3.85823	0.00011421	0.00119257
ENSMUSG00000020101	4632428N05Rik	302.901	0.804804	0.208667	3.85688	0.000114845	0.0011984
ENSMUSG00000040339	Fam102b	1204.56	-0.421568	0.109323	-3.85615	0.000115186	0.00120115
ENSMUSG00000028362	Tnfsf8	82.4219	1.41627	0.367367	3.85518	0.000115645	0.00120432
ENSMUSG00000031386	Hcfc1	1150.34	-0.448062	0.116223	-3.8552	0.000115635	0.00120432
ENSMUSG00000022353	Mtss1	368.166	0.609703	0.15823	3.85327	0.000116552	0.00121295
ENSMUSG00000022111	Uchl3	461.2	-0.531817	0.138067	-3.85186	0.000117222	0.00121911
ENSMUSG00000026102	Inpp1	414.497	0.54625	0.141938	3.84852	0.000118833	0.00123504
ENSMUSG00000025059	Gyk	208.174	-0.786961	0.204495	-3.84831	0.000118934	0.00123526
ENSMUSG00000040462	Os9	1151.2	0.366674	0.0953571	3.84527	0.000120419	0.00124823
ENSMUSG00000053541	Gm4759	1290.38	0.430379	0.11192	3.84541	0.000120353	0.00124823
ENSMUSG00000056999	Ide	969.57	-0.429577	0.111716	-3.84526	0.000120424	0.00124823
ENSMUSG00000030844	Rgs10	102.034	-1.4226	0.37042	-3.84051	0.000122778	0.00127178
ENSMUSG00000023015	Racgap1	595.167	-0.571467	0.148843	-3.83938	0.000123343	0.00127574
ENSMUSG00000026463	Atp2b4	1830.53	-0.314751	0.0819759	-3.83956	0.000123256	0.00127574
ENSMUSG00000075232	Amd1	268.355	-0.781793	0.203631	-3.83926	0.000123405	0.00127574
ENSMUSG00000069769	Msi2	1980.46	0.37183	0.0968856	3.83783	0.000124127	0.00128234
ENSMUSG00000061665	Cd2ap	416.867	0.606915	0.158189	3.83665	0.000124722	0.00128764
ENSMUSG00000031010	Usp9x	457.658	0.532066	0.138708	3.83586	0.000125126	0.00129095
ENSMUSG00000106744	Riok2	466.334	-0.5257	0.137116	-3.83399	0.000126084	0.00129997
ENSMUSG00000031666	Rbl2	433.629	0.62302	0.162521	3.83347	0.00012635	0.00130185
ENSMUSG00000021079	Timm9	548.647	-0.488016	0.127321	-3.83296	0.000126613	0.00130369
ENSMUSG00000039682	Lap3	325.557	-0.668753	0.174618	-3.82982	0.000128239	0.00131956
ENSMUSG00000024758	Rtn3	1925.5	-0.31091	0.0811984	-3.82902	0.000128656	0.00132297
ENSMUSG00000022360	Atad2	979.744	-0.401694	0.104915	-3.82876	0.000128791	0.00132349
ENSMUSG00000021108	Prkch	2449.16	0.312987	0.0818371	3.8245	0.000131035	0.00134566
ENSMUSG00000032554	Trf	121.565	-1.22141	0.319592	-3.82179	0.000132486	0.00135967
ENSMUSG00000000708	Kat2b	674.085	0.56689	0.148372	3.82074	0.000133053	0.00136459
ENSMUSG00000081382	Rpl18-ps1	1026.39	-0.507774	0.132908	-3.8205	0.000133181	0.00136499
ENSMUSG00000021819	Zswim8	401.847	0.653173	0.171002	3.81968	0.000133623	0.00136772
ENSMUSG00000036104	Rab3gap1	1376.01	0.367754	0.0962769	3.81975	0.000133585	0.00136772
ENSMUSG00000018899	Irf1	1969.11	0.363548	0.0951884	3.81924	0.000133863	0.00136928
ENSMUSG00000058979	Cecr5	249.038	0.889118	0.232833	3.8187	0.000134158	0.00137139
ENSMUSG00000034243	Golgb1	1889.83	0.359518	0.0941688	3.8178	0.000134648	0.0013755
ENSMUSG00000013707	Tnfaip8l2	65.4438	-1.54363	0.40445	-3.81663	0.000135287	0.00138111
ENSMUSG00000027984	Hadh	590.324	-0.502956	0.131799	-3.81609	0.000135584	0.00138174
ENSMUSG00000045349	Sh2d5	1916.24	0.38553	0.101029	3.81603	0.000135615	0.00138174
ENSMUSG00000066258	Trim12a	708.945	0.548978	0.143855	3.81619	0.000135527	0.00138174
ENSMUSG00000033032	Afap1l1	183.018	-0.928124	0.243358	-3.81382	0.000136837	0.00139328
ENSMUSG00000047989	Ino80c	690.561	-0.441886	0.115872	-3.81355	0.000136985	0.00139387
ENSMUSG00000052751	Repin1	841.61	0.427998	0.112243	3.81315	0.000137206	0.00139521
ENSMUSG00000032314	Etfa	545.991	-0.643817	0.16892	-3.81137	0.000138201	0.00140441
ENSMUSG00000034165	Ccnd3	378.163	0.60365	0.158404	3.81082	0.000138508	0.00140661
ENSMUSG00000032010	Usp2	265.978	0.878245	0.230821	3.80487	0.000141879	0.0014399
ENSMUSG00000040710	St8sia4	931.249	-0.394226	0.103636	-3.80395	0.000142409	0.00144435
ENSMUSG00000011158	Brf1	785.39	0.435057	0.114425	3.80213	0.00014346	0.00145405
ENSMUSG00000103983	Gm20045	142.456	0.996251	0.26216	3.80016	0.000144601	0.00146466
ENSMUSG00000067219	Nipal1	49.9842	2.31103	0.608834	3.79583	0.000147152	0.00148953
ENSMUSG00000049092	Gpr137c	18.6456	3.05899	0.806129	3.79467	0.000147841	0.00149553
ENSMUSG00000028517	Ppap2b	95.6456	1.24601	0.328415	3.79401	0.000148235	0.00149854
ENSMUSG00000022489	Pde1b	630.659	0.495641	0.130721	3.79159	0.000149685	0.00151222
ENSMUSG00000031155	Pim2	293.539	0.68976	0.181955	3.79082	0.000150149	0.00151592
ENSMUSG00000040331	Nsmce4a	648.23	-0.439918	0.116061	-3.79041	0.0001504	0.00151746
ENSMUSG00000034708	Grn	716.973	-0.425783	0.112446	-3.78656	0.00015275	0.00154018
ENSMUSG00000018932	Map2k3	693.779	-0.487749	0.128838	-3.78575	0.000153246	0.00154418
ENSMUSG00000010406	Mrpl52	896.062	0.404677	0.106934	3.78435	0.000154109	0.00155187
ENSMUSG00000048442	Smim5	70.8501	-1.30999	0.346236	-3.78352	0.000154626	0.00155606
ENSMUSG00000038388	Mpp6	564.786	-0.508791	0.134564	-3.78104	0.000156177	0.00157066
ENSMUSG00000022216	Psme1	2411.87	0.290519	0.0769021	3.77777	0.000158238	0.00159036
ENSMUSG00000054404	Slfn5	85.706	1.21923	0.322879	3.77612	0.000159288	0.00159988
ENSMUSG00000010663	Fads1	445.082	-0.615695	0.163089	-3.77522	0.000159869	0.00160468
ENSMUSG00000022801	Lrch3	351.433	0.637577	0.16893	3.77421	0.000160516	0.00161013
ENSMUSG00000000791	Il12rb1	262.173	0.877157	0.232452	3.7735	0.000160974	0.00161368
ENSMUSG00000034252	Senp6	2386.21	0.264529	0.0701188	3.77258	0.00016157	0.00161861
ENSMUSG00000029478	Ncor2	379.522	-0.556488	0.147523	-3.7722	0.000161813	0.00162
ENSMUSG00000034973	Dopey1	252.756	0.768837	0.203968	3.76939	0.000163644	0.00163658
ENSMUSG00000039016	Timm8b	499.396	-0.505075	0.133995	-3.76934	0.000163679	0.00163658
ENSMUSG00000054428	Atpif1	3063.39	-0.30958	0.0821702	-3.76754	0.000164861	0.00164734
ENSMUSG00000026095	Asnsd1	412.65	-0.628411	0.166827	-3.76683	0.000165331	0.00165098
ENSMUSG00000044950	Pwwp2a	1075.29	0.367697	0.0976214	3.76656	0.000165511	0.00165171
ENSMUSG00000024055	Cyp4f13	124.659	0.980352	0.260331	3.76578	0.000166029	0.00165582
ENSMUSG00000030795	Fus	4750.54	-0.358969	0.0953436	-3.76501	0.000166545	0.00165989
ENSMUSG00000024308	Tapbp	1480.9	0.348744	0.092653	3.76397	0.000167235	0.0016657
ENSMUSG00000021133	Susd6	283.714	0.834637	0.221754	3.76379	0.000167356	0.00166585
ENSMUSG00000039952	Dag1	238.947	-0.719678	0.191356	-3.76093	0.000169285	0.00168397
ENSMUSG00000026842	Abl1	908.636	-0.448212	0.119222	-3.75948	0.000170268	0.00169267
ENSMUSG00000040818	Dennd6a	280.169	-0.735401	0.195623	-3.75928	0.0001704	0.00169289
ENSMUSG00000021559	Dapk1	362.069	0.704346	0.187383	3.75886	0.000170692	0.00169471
ENSMUSG00000025381	Cnpy2	1391.4	-0.344822	0.0917442	-3.75851	0.000170925	0.00169594
ENSMUSG00000028413	B4galt1	771.556	0.436847	0.116243	3.75805	0.000171245	0.00169804
ENSMUSG00000021281	Tnfaip2	19.6811	2.76077	0.734758	3.75739	0.000171697	0.00170143
ENSMUSG00000107136	RP23-130C18.2	176.414	0.970604	0.258606	3.75322	0.000174578	0.00172888
ENSMUSG00000023030	Slc11a2	189.639	0.860549	0.229334	3.75238	0.000175162	0.00173356
ENSMUSG00000020186	Csrp2	15.6814	-3.68688	0.98272	-3.75171	0.000175635	0.00173603
ENSMUSG00000020440	Arf5	1416.78	0.422427	0.112592	3.75184	0.00017554	0.00173603
ENSMUSG00000057191	AB124611	248.443	-0.733397	0.195619	-3.74911	0.000177461	0.00175296
ENSMUSG00000001707	Eef1e1	162.871	-0.87688	0.233905	-3.74887	0.000177632	0.00175353
ENSMUSG00000021211	Akr1c12	969.992	-0.433378	0.115612	-3.74856	0.00017785	0.00175457
ENSMUSG00000035365	Parpbp	47.0924	-1.56423	0.417494	-3.74671	0.000179171	0.00176649
ENSMUSG00000036112	Metap2	3861.43	0.233595	0.0623534	3.74632	0.000179449	0.00176811
ENSMUSG00000006587	Snai3	17.1304	3.22376	0.860907	3.74461	0.000180673	0.00177904
ENSMUSG00000052331	Ankrd44	1526.72	-0.307211	0.0820911	-3.74232	0.000182329	0.00179421
ENSMUSG00000024312	Wdr46	307.384	-0.715201	0.191172	-3.74115	0.000183183	0.00180147
ENSMUSG00000021929	Kpna3	1013.43	-0.457127	0.122254	-3.73916	0.000184639	0.00181465
ENSMUSG00000092203	1110038B12Rik	1068.53	-0.450449	0.120474	-3.73898	0.000184768	0.00181476
ENSMUSG00000029422	Rsrc2	2986.83	0.285946	0.0764825	3.73871	0.000184965	0.00181555
ENSMUSG00000071072	Ptges3	1362.44	-0.381215	0.102074	-3.73468	0.000187956	0.00184375
ENSMUSG00000046179	E2f8	196.649	-0.80695	0.216176	-3.73284	0.000189336	0.00185611
ENSMUSG00000028759	Hp1bp3	8253.71	0.226249	0.0606332	3.73144	0.000190388	0.00186525
ENSMUSG00000002052	Supt6	723.435	0.424204	0.113713	3.73049	0.000191105	0.0018711
ENSMUSG00000017692	Rhbdl3	34.4898	1.89921	0.509133	3.73028	0.000191265	0.00187148
ENSMUSG00000020290	Xpo1	1289.46	-0.362353	0.0971545	-3.72966	0.000191739	0.00187422
ENSMUSG00000022824	Muc13	2975.52	-0.313311	0.0840066	-3.7296	0.000191786	0.00187422
ENSMUSG00000048965	Mrgpre	139.136	1.02876	0.275923	3.72842	0.000192682	0.00188179
ENSMUSG00000081992	Gm13408	578.936	-0.594079	0.15937	-3.72767	0.000193261	0.00188627
ENSMUSG00000032966	Fkbp1a	2248.59	-0.30797	0.0827023	-3.72383	0.00019622	0.00191394
ENSMUSG00000001228	Uhrf1	915.807	-0.408099	0.109609	-3.72324	0.000196684	0.00191727
ENSMUSG00000009013	Dynll1	1036.01	-0.482296	0.129576	-3.72211	0.000197561	0.00192461
ENSMUSG00000071984	Fndc1	41.3568	-2.08391	0.559924	-3.72176	0.000197835	0.00192608
ENSMUSG00000036264	Fstl4	158.259	0.928241	0.249519	3.72013	0.000199124	0.00193741
ENSMUSG00000032698	Lmo2	146.821	-0.97337	0.262213	-3.71213	0.000205522	0.00199841
ENSMUSG00000019256	Ahr	132.071	0.974745	0.26263	3.71148	0.000206055	0.00200234
ENSMUSG00000031532	Saraf	2541.15	0.299153	0.0806321	3.7101	0.000207181	0.00201203
ENSMUSG00000024969	Mark2	510.596	0.535223	0.144369	3.70733	0.00020946	0.00203289
ENSMUSG00000037487	Ubr5	1181.13	0.365994	0.0987558	3.70605	0.000210515	0.00204185
ENSMUSG00000015757	Ppil4	2812.32	0.253534	0.0684747	3.70259	0.000213409	0.00206863
ENSMUSG00000005610	Eif4g2	6392.2	-0.222995	0.060237	-3.70196	0.000213938	0.00207246
ENSMUSG00000087384	Gm15558	15.3066	3.37141	0.91136	3.69931	0.000216185	0.00209292
ENSMUSG00000021930	Spryd7	90.2632	-1.29923	0.351227	-3.69911	0.000216354	0.00209326
ENSMUSG00000028228	Cpne3	1001.8	-0.379035	0.102528	-3.69689	0.00021826	0.00211038
ENSMUSG00000004633	Chn2	108.324	-1.07109	0.289875	-3.69501	0.000219877	0.00212471
ENSMUSG00000021957	Tkt	1908.7	-0.451174	0.122124	-3.69438	0.000220426	0.00212737
ENSMUSG00000027901	Dennd2d	300.14	0.632801	0.171281	3.69453	0.000220296	0.00212737
ENSMUSG00000026374	Tsn	3318.45	-0.238939	0.0646905	-3.69357	0.000221128	0.00213274
ENSMUSG00000042289	Hsd3b7	121.214	-1.058	0.286454	-3.69342	0.000221257	0.00213274
ENSMUSG00000020163	Uqcr11	781.398	-0.40982	0.110991	-3.69238	0.000222166	0.00214017
ENSMUSG00000079455	Gm16026	439.306	0.647183	0.175319	3.69146	0.000222973	0.00214662
ENSMUSG00000031948	Kars	1182.26	-0.356112	0.0964792	-3.69107	0.00022331	0.00214853
ENSMUSG00000031503	Col4a2	59.3209	-1.36491	0.369845	-3.69049	0.000223825	0.00215082
ENSMUSG00000037257	Aagab	1009.29	0.392519	0.106357	3.69059	0.000223736	0.00215082
ENSMUSG00000036117	Il5	6.49989	6.20926	1.68366	3.68795	0.000226067	0.00217103
ENSMUSG00000074238	Ap1ar	705.725	0.518288	0.140556	3.68742	0.000226543	0.00217425
ENSMUSG00000024063	Lbh	1267.73	0.400478	0.108678	3.68499	0.000228713	0.00219372
ENSMUSG00000042599	Kdm7a	450.274	0.75098	0.203833	3.6843	0.000229334	0.00219609
ENSMUSG00000062627	Mysm1	913.306	0.442291	0.120042	3.68448	0.000229168	0.00219609
ENSMUSG00000097321	1700028E10Rik	49.5469	1.6235	0.440661	3.68424	0.000229383	0.00219609
ENSMUSG00000037997	Parp11	614.125	0.481209	0.130622	3.68397	0.000229629	0.00219709
ENSMUSG00000021546	Hnrnpk	4065.67	-0.274946	0.0746526	-3.68301	0.000230497	0.00220403
ENSMUSG00000079426	Arpc4	1720.11	-0.33067	0.0897882	-3.68278	0.000230703	0.00220466
ENSMUSG00000056724	Nbeal2	676.542	-0.55111	0.149683	-3.68184	0.000231558	0.00221146
ENSMUSG00000030766	Arhgap17	321.485	-0.596593	0.162048	-3.68158	0.000231793	0.00221235
ENSMUSG00000049550	Clip1	1599.38	0.316294	0.0859164	3.68141	0.000231946	0.00221245
ENSMUSG00000068115	Ninl	99.0738	-1.15581	0.314057	-3.68027	0.000232989	0.00222104
ENSMUSG00000071866	Ppia	916.115	-0.489565	0.133154	-3.6767	0.000236272	0.00224958
ENSMUSG00000101483	1700016L21Rik	25.4784	2.36629	0.643576	3.67678	0.000236193	0.00224958
ENSMUSG00000029521	Chek2	252.772	-0.668473	0.181829	-3.67638	0.000236565	0.00225098
ENSMUSG00000038290	Smg6	1004.07	0.437982	0.119159	3.67562	0.000237275	0.0022553
ENSMUSG00000040430	Pitpnc1	5287.25	0.228208	0.0620876	3.67558	0.000237309	0.0022553
ENSMUSG00000060438	Rps10-ps1	5247.01	-0.249376	0.0678874	-3.67338	0.000239365	0.00227345
ENSMUSG00000064344	mt-Tm	126.151	0.985862	0.268427	3.67274	0.000239967	0.00227778
ENSMUSG00000048583	Igf2	7370.46	0.319315	0.0869774	3.67124	0.000241374	0.00228974
ENSMUSG00000070348	Ccnd1	55.3234	-1.68524	0.459243	-3.66962	0.000242914	0.00230294
ENSMUSG00000025468	Caly	5.84178	6.06039	1.65218	3.66812	0.000244338	0.00231503
ENSMUSG00000040250	Asun	517.462	0.568934	0.15516	3.66676	0.000245639	0.00232594
ENSMUSG00000030629	Zfand6	1889.56	0.284478	0.0775889	3.66647	0.000245919	0.00232717
ENSMUSG00000073155	1810058I24Rik	1323.78	-0.357105	0.0974288	-3.66529	0.000247061	0.00233656
ENSMUSG00000047879	Usp14	1004.85	-0.369144	0.100737	-3.66442	0.000247903	0.0023431
ENSMUSG00000006599	Gtf2h1	932.833	0.395529	0.107949	3.66405	0.000248261	0.00234364
ENSMUSG00000022221	Ripk3	231.974	-0.769894	0.210119	-3.66408	0.000248229	0.00234364
ENSMUSG00000001323	Srr	106.97	1.11996	0.305703	3.66355	0.000248743	0.00234676
ENSMUSG00000039908	Slc26a11	264.466	-0.739696	0.201965	-3.6625	0.000249771	0.00235502
ENSMUSG00000104197	Gm37632	208.22	0.763926	0.208602	3.66212	0.000250135	0.00235703
ENSMUSG00000017861	Mybl2	142.651	-0.968992	0.264715	-3.66051	0.000251714	0.00237047
ENSMUSG00000063286	Gm8995	4476.34	0.270346	0.0738682	3.65984	0.000252375	0.00237526
ENSMUSG00000021520	Uqcrb	857.357	-0.486563	0.13297	-3.6592	0.000253005	0.00237975
ENSMUSG00000025261	Huwe1	3022.86	0.290259	0.0793301	3.65888	0.000253321	0.00238128
ENSMUSG00000040883	Tmem205	84.5897	-1.26507	0.34592	-3.65713	0.000255057	0.00239614
ENSMUSG00000054426	A930005H10Rik	297.298	0.71037	0.194558	3.65121	0.000261011	0.00245061
ENSMUSG00000020102	Slc16a7	28.9712	-2.11521	0.579515	-3.64997	0.000262275	0.00246099
ENSMUSG00000015880	Ncapg	426.206	-0.666401	0.182698	-3.64756	0.000264743	0.00248115
ENSMUSG00000059791	Nrm	281.918	-0.719051	0.197131	-3.64757	0.000264732	0.00248115
ENSMUSG00000086894	Gm15708	37.8949	1.77478	0.486597	3.64733	0.00026498	0.00248187
ENSMUSG00000034311	Kif4	177.141	-0.864168	0.23712	-3.64444	0.000267977	0.00250692
ENSMUSG00000070691	Runx3	4469.99	0.258407	0.0709039	3.64446	0.000267954	0.00250692
ENSMUSG00000097344	Gm26732	81.6816	1.30084	0.357421	3.63952	0.00027315	0.00255378
ENSMUSG00000048758	Rpl29	1139.5	-0.407221	0.111944	-3.63771	0.000275072	0.0025702
ENSMUSG00000028937	Acot7	1506.84	-0.327603	0.0901385	-3.63444	0.000278585	0.00260147
ENSMUSG00000047747	Rnf150	42.6532	-1.74786	0.480958	-3.63412	0.000278936	0.00260318
ENSMUSG00000016181	Diexf	545.494	0.455907	0.125585	3.63025	0.000283143	0.00264086
ENSMUSG00000020919	Stat5b	1852.39	-0.289025	0.079641	-3.62909	0.00028442	0.00265118
ENSMUSG00000028678	Kif2c	155.917	-0.936648	0.258196	-3.62766	0.000285999	0.0026643
ENSMUSG00000086795	Gm11579	58.5758	1.3661	0.376659	3.62689	0.000286855	0.00267067
ENSMUSG00000039701	Usp53	126.957	1.12167	0.309307	3.62639	0.000287407	0.00267421
ENSMUSG00000024091	Vapa	1377.23	-0.331166	0.0913406	-3.62562	0.00028827	0.00268064
ENSMUSG00000026683	Nuf2	111.106	-1.07567	0.296762	-3.62467	0.000289327	0.00268654
ENSMUSG00000032217	Rnf111	657.28	0.429326	0.118448	3.62459	0.000289423	0.00268654
ENSMUSG00000036751	Cox6b1	2289.96	-0.317922	0.0877111	-3.62465	0.000289352	0.00268654
ENSMUSG00000042043	Tbca	4698.8	0.249067	0.0687301	3.62385	0.000290255	0.00269265
ENSMUSG00000057132	Rpgrip1	318.683	0.61354	0.169376	3.62235	0.000291936	0.00270664
ENSMUSG00000049755	Zfp672	278.107	0.649336	0.17933	3.6209	0.000293585	0.00272029
ENSMUSG00000019139	Isyna1	891.365	-0.466236	0.128778	-3.62046	0.000294077	0.00272324
ENSMUSG00000047888	Tnrc6b	3070.82	0.264892	0.0731949	3.619	0.00029574	0.002737
ENSMUSG00000038005	2700029M09Rik	663.497	-0.488449	0.135009	-3.61791	0.000296996	0.00274699
ENSMUSG00000049235	Gm7324	218.021	-0.849349	0.234858	-3.61643	0.000298695	0.00276107
ENSMUSG00000052125	F730043M19Rik	85.9617	1.4495	0.400874	3.61586	0.00029935	0.00276548
ENSMUSG00000061838	Suclg2	157.864	-0.928856	0.257013	-3.61404	0.000301463	0.00278334
ENSMUSG00000022961	Son	11121	0.215407	0.0596364	3.61201	0.000303838	0.0028036
ENSMUSG00000037072	2015-09-01	1159.16	-0.402301	0.111387	-3.61175	0.000304142	0.00280475
ENSMUSG00000029642	Polr1d	888.855	-0.405242	0.112217	-3.61124	0.000304739	0.00280859
ENSMUSG00000038344	Txlng	336.627	0.60896	0.168678	3.6102	0.000305959	0.00281816
ENSMUSG00000038843	Gcnt1	177.139	-0.784142	0.217235	-3.60965	0.000306605	0.00282244
ENSMUSG00000044220	Nkx2-3	5.96885	-5.97264	1.6549	-3.60907	0.000307293	0.0028271
ENSMUSG00000068227	Il2rb	112.293	3.07206	0.851338	3.60851	0.000307961	0.00283157
ENSMUSG00000000088	Cox5a	323.998	-0.664175	0.184171	-3.60629	0.000310603	0.00285417
ENSMUSG00000018372	Cep95	615.33	0.489792	0.135905	3.60392	0.000313452	0.00287865
ENSMUSG00000078784	1810022K09Rik	1052.13	-0.403999	0.112107	-3.60369	0.000313726	0.00287947
ENSMUSG00000024642	Tle4	559.685	-0.479884	0.13326	-3.60112	0.000316851	0.00290643
ENSMUSG00000022551	Cyc1	441.134	-0.525007	0.145885	-3.59877	0.000319725	0.00293107
ENSMUSG00000053007	Creb5	90.6165	1.19603	0.332438	3.59775	0.000320978	0.00294081
ENSMUSG00000049470	Aff4	1203.36	0.348434	0.0970087	3.59178	0.000328429	0.00300731
ENSMUSG00000004558	Ndrg2	245.739	0.852302	0.237404	3.59009	0.000330565	0.00302509
ENSMUSG00000029135	Fosl2	130.709	0.972366	0.270877	3.5897	0.00033106	0.00302783
ENSMUSG00000052707	Tnrc6a	2904.56	0.248381	0.0692453	3.58698	0.000334536	0.00305783
ENSMUSG00000028560	Usp1	1904.63	-0.318973	0.0889352	-3.58657	0.00033505	0.00306073
ENSMUSG00000025933	Tmem14a	144.597	-0.879351	0.245189	-3.58641	0.000335256	0.00306081
ENSMUSG00000016940	Kctd2	367.509	0.575473	0.160494	3.58563	0.000336266	0.00306823
ENSMUSG00000029004	Kmt2e	7140.55	0.210262	0.0586479	3.58517	0.000336863	0.00307187
ENSMUSG00000021607	Mrpl36	645.793	-0.46438	0.129565	-3.58416	0.000338166	0.00308195
ENSMUSG00000062524	Ncr1	15.5309	3.60225	1.0057	3.58185	0.000341175	0.00310755
ENSMUSG00000049751	Rpl36al	1021.26	-0.398988	0.111425	-3.58079	0.000342561	0.00311835
ENSMUSG00000103674	Gm37699	96.1378	1.06775	0.29823	3.58029	0.000343211	0.00312244
ENSMUSG00000029513	Prkab1	292.142	-0.650526	0.181718	-3.57986	0.000343774	0.00312573
ENSMUSG00000101599	Gm20342	556.579	0.508675	0.142165	3.57805	0.000346161	0.0031456
ENSMUSG00000031505	Carkd	728.65	0.497042	0.138924	3.57779	0.000346505	0.00314688
ENSMUSG00000027673	Ndufb5	1831.68	-0.310228	0.086714	-3.5776	0.00034677	0.00314744
ENSMUSG00000053838	Nudcd3	677.317	0.409711	0.114538	3.57706	0.000347477	0.00315203
ENSMUSG00000101944	Mrgprc4-ps	5.60957	5.99934	1.67746	3.57644	0.000348308	0.00315772
ENSMUSG00000032400	Zwilch	239.543	-0.737944	0.206365	-3.57591	0.000349015	0.00316229
ENSMUSG00000066880	Zfp617	581.472	0.485167	0.13569	3.57555	0.000349496	0.0031648
ENSMUSG00000025505	Tmem80	362.049	0.668577	0.187006	3.57517	0.000349996	0.00316564
ENSMUSG00000066979	Bub3	1459.3	-0.333491	0.0932762	-3.57531	0.000349812	0.00316564
ENSMUSG00000031112	Stk26	708.212	-0.430711	0.120539	-3.5732	0.000352641	0.00318771
ENSMUSG00000022844	Pdia5	180.051	-0.870162	0.243557	-3.57273	0.000353283	0.00319166
ENSMUSG00000073627	C130036L24Rik	133.857	1.00933	0.28265	3.57096	0.000355675	0.0032114
ENSMUSG00000024381	Bin1	477.501	-0.581752	0.162929	-3.57059	0.000356177	0.00321407
ENSMUSG00000016308	Ube2a	664.307	-0.447695	0.125406	-3.56997	0.000357022	0.00321887
ENSMUSG00000022247	Brix1	677.37	-0.505626	0.141636	-3.5699	0.000357123	0.00321887
ENSMUSG00000026495	Efcab2	44.6244	-1.5691	0.439621	-3.56922	0.000358044	0.0032253
ENSMUSG00000005034	Prkacb	2253.27	0.302123	0.0846811	3.56777	0.000360029	0.0032413
ENSMUSG00000025626	Phf6	679.703	-0.433845	0.12161	-3.56751	0.000360386	0.00324264
ENSMUSG00000037278	Tmem97	87.8178	-1.19889	0.336134	-3.5667	0.000361509	0.00325086
ENSMUSG00000032640	Chsy1	389.717	-0.639753	0.179395	-3.56616	0.000362247	0.00325562
ENSMUSG00000038352	Arl5c	111.408	1.05885	0.297041	3.56466	0.000364335	0.00327249
ENSMUSG00000026245	Farsb	628.358	-0.461089	0.129389	-3.56359	0.000365818	0.00328392
ENSMUSG00000058454	Dhcr7	357.515	0.643943	0.180769	3.56225	0.000367692	0.00329883
ENSMUSG00000087088	Gm16638	5.66064	6.01114	1.68932	3.55831	0.000373253	0.00334679
ENSMUSG00000025351	Cd63	167.31	0.901385	0.253336	3.55806	0.000373604	0.00334801
ENSMUSG00000070111	Gm10286	82.8466	-1.22022	0.343031	-3.55716	0.000374887	0.00335757
ENSMUSG00000028437	Ubap1	460.561	-0.530159	0.149053	-3.55684	0.000375338	0.00335967
ENSMUSG00000065087	Snord22	30.4321	-1.94895	0.548013	-3.5564	0.000375977	0.00336346
ENSMUSG00000015889	Lta4h	3094.38	0.258704	0.0728017	3.55355	0.000380073	0.00339637
ENSMUSG00000028576	Ift74	356.026	0.645528	0.181658	3.55353	0.000380093	0.00339637
ENSMUSG00000025616	Usp16	783.027	0.395777	0.111382	3.55333	0.000380383	0.00339701
ENSMUSG00000073902	Gm1966	623.061	0.476376	0.134128	3.55165	0.000382827	0.00341688
ENSMUSG00000024639	Gnaq	1289.5	0.388783	0.109519	3.54991	0.000385365	0.00343755
ENSMUSG00000028614	Ndc1	219.869	-0.823779	0.232126	-3.54885	0.000386917	0.00344942
ENSMUSG00000030786	Itgam	110.024	-1.01582	0.286413	-3.5467	0.000390083	0.00347565
ENSMUSG00000008683	Rps15a	13480.1	-0.199534	0.0562695	-3.54605	0.000391051	0.00348228
ENSMUSG00000028465	Tln1	2839.13	-0.267577	0.0754698	-3.54549	0.000391888	0.00348774
ENSMUSG00000033940	Brk1	1365.54	-0.360192	0.101603	-3.54507	0.000392504	0.00349122
ENSMUSG00000038766	Gabpb2	1043.04	0.373562	0.105392	3.54452	0.000393335	0.00349657
ENSMUSG00000103038	Gm37124	1341.8	0.417578	0.117814	3.54437	0.000393556	0.00349657
ENSMUSG00000064210	Ano6	611.426	0.433608	0.122359	3.54374	0.000394493	0.0035029
ENSMUSG00000022024	Sugt1	1144.79	0.373619	0.105505	3.54124	0.000398256	0.0035343
ENSMUSG00000026648	Dclre1c	172.75	0.78173	0.220785	3.54068	0.000399093	0.0035397
ENSMUSG00000025204	Ndufb8	1192.31	-0.375665	0.106166	-3.53846	0.000402475	0.0035676
ENSMUSG00000045092	S1pr1	66.507	1.38198	0.390576	3.53831	0.000402697	0.0035676
ENSMUSG00000042042	Csgalnact2	283.967	-0.654588	0.185025	-3.53784	0.00040341	0.00357188
ENSMUSG00000055723	Rras2	1057.49	0.354083	0.10009	3.53764	0.000403722	0.0035726
ENSMUSG00000034220	Gpc1	119.913	-1.17674	0.332692	-3.53704	0.000404643	0.00357872
ENSMUSG00000022422	Dscc1	150.855	-1.05032	0.296998	-3.53646	0.000405522	0.00358445
ENSMUSG00000020171	Yeats4	1120.51	-0.363329	0.102777	-3.53512	0.000407591	0.0036007
ENSMUSG00000022967	Ifnar1	312.857	0.577311	0.163342	3.53436	0.000408758	0.00360896
ENSMUSG00000034235	Usp54	146.57	0.84678	0.239613	3.53395	0.000409405	0.00361261
ENSMUSG00000002489	Tiam1	744.334	0.39636	0.112175	3.53341	0.000410238	0.00361792
ENSMUSG00000042064	Myo3b	5.47302	5.96283	1.69036	3.52754	0.00041944	0.00369697
ENSMUSG00000025236	Adpgk	214.776	0.828894	0.235027	3.52681	0.000420597	0.00370507
ENSMUSG00000000278	Scpep1	126.803	-0.908928	0.257883	-3.52457	0.000424173	0.00373445
ENSMUSG00000031712	Il15	49.8203	-1.77139	0.502855	-3.52268	0.000427214	0.0037591
ENSMUSG00000063077	Kif1b	14.0325	3.23086	0.917645	3.52082	0.00043022	0.00378341
ENSMUSG00000044627	Swi5	1234.58	-0.362327	0.102927	-3.52023	0.000431177	0.00378968
ENSMUSG00000062822	4833420G17Rik	1353.28	0.313499	0.0890708	3.51966	0.000432098	0.00379563
ENSMUSG00000022902	Stfa2	9.25569	4.78316	1.35932	3.51879	0.000433527	0.00380603
ENSMUSG00000032328	Tmem30a	1377.94	0.336606	0.0956999	3.5173	0.000435954	0.00382518
ENSMUSG00000020328	Nudcd2	1197.79	-0.357028	0.10152	-3.51682	0.000436753	0.00383003
ENSMUSG00000028029	Aimp1	1531.35	-0.314979	0.0895711	-3.51652	0.000437242	0.0038308
ENSMUSG00000053931	Cnn3	692.513	-0.472981	0.134505	-3.51647	0.000437334	0.0038308
ENSMUSG00000075595	Zfp652	1682.88	0.341277	0.0970843	3.51526	0.000439322	0.00384604
ENSMUSG00000031393	Mecp2	776.319	0.381651	0.108642	3.51292	0.000443203	0.00387784
ENSMUSG00000025066	Sfr1	2541.19	-0.280171	0.0798321	-3.5095	0.000448948	0.00392523
ENSMUSG00000029036	Atad3a	248.773	-0.747921	0.21312	-3.5094	0.000449125	0.00392523
ENSMUSG00000074088	Snrnp40	957.724	-0.39467	0.11249	-3.50849	0.000450651	0.00393636
ENSMUSG00000033306	Lpp	1284.12	0.420914	0.120006	3.50745	0.000452427	0.00394965
ENSMUSG00000049892	Rasd1	13.4787	-3.5398	1.00959	-3.50619	0.00045457	0.00396614
ENSMUSG00000016087	Fli1	2335.83	0.273501	0.0780574	3.50384	0.000458595	0.00399901
ENSMUSG00000063605	Ccdc102a	185.662	-0.827533	0.236301	-3.50203	0.000461721	0.00402401
ENSMUSG00000055782	Abcd2	10.7453	5.15052	1.47169	3.49973	0.000465734	0.00405671
ENSMUSG00000042401	Crtac1	29.1056	-2.29945	0.657122	-3.49927	0.000466528	0.00406135
ENSMUSG00000020116	Pno1	337.501	-0.614591	0.175644	-3.49908	0.000466867	0.00406203
ENSMUSG00000029147	Ppm1g	1133.05	-0.326749	0.0933929	-3.49865	0.000467618	0.00406629
ENSMUSG00000004945	Tmem242	688.907	0.418073	0.119512	3.49817	0.000468464	0.00407137
ENSMUSG00000049109	Themis	2249.84	0.71457	0.204317	3.49736	0.000469895	0.00408152
ENSMUSG00000040940	Arhgef1	1471.34	0.34842	0.0996298	3.49715	0.000470264	0.00408245
ENSMUSG00000098645	Gm27201	267.218	0.692776	0.198187	3.49557	0.000473051	0.00410435
ENSMUSG00000036353	P2ry12	49.8727	1.45346	0.416148	3.49264	0.000478265	0.00414727
ENSMUSG00000062981	Mrpl42	578.46	-0.499229	0.142966	-3.49194	0.000479525	0.00415588
ENSMUSG00000029826	Zc3hav1	1198.65	0.312029	0.0893871	3.49076	0.000481652	0.00417199
ENSMUSG00000026202	Tuba4a	3867.46	-0.277634	0.079545	-3.49028	0.000482515	0.00417633
ENSMUSG00000052889	Prkcb	396.82	0.57322	0.164238	3.49018	0.00048269	0.00417633
ENSMUSG00000034450	Gulo	49.907	1.46588	0.42004	3.48986	0.000483276	0.00417907
ENSMUSG00000000486	2001-09-01	901.588	0.409848	0.117494	3.48824	0.000486214	0.00420214
ENSMUSG00000024401	Tnf	125.301	-0.922112	0.264368	-3.48799	0.000486665	0.00420371
ENSMUSG00000028032	Papss1	266.854	-0.603798	0.173129	-3.48756	0.000487441	0.00420641
ENSMUSG00000052407	Ccdc171	411.682	0.617163	0.176966	3.48746	0.000487637	0.00420641
ENSMUSG00000098318	1190002F15Rik	451.976	-0.552503	0.158429	-3.48737	0.00048779	0.00420641
ENSMUSG00000037946	Fgd3	213.908	0.723485	0.207469	3.4872	0.000488107	0.00420681
ENSMUSG00000010142	Tnfrsf13b	998.447	-0.412764	0.118381	-3.48674	0.000488941	0.00421166
ENSMUSG00000047129	1700113H08Rik	8.50863	-5.50365	1.5788	-3.48596	0.00049037	0.00422163
ENSMUSG00000031198	Fundc2	1701.07	-0.323259	0.0927425	-3.48555	0.000491125	0.00422545
ENSMUSG00000056091	St3gal5	60.9495	-1.54955	0.444598	-3.48528	0.000491628	0.00422545
ENSMUSG00000059463	Spag11b	36.4774	-1.98972	0.570883	-3.48533	0.000491523	0.00422545
ENSMUSG00000076928	Trac	65.2941	1.25685	0.36076	3.4839	0.00049417	0.00424495
ENSMUSG00000019986	Ahi1	422.752	0.553574	0.158926	3.48322	0.000495416	0.0042533
ENSMUSG00000028108	Ecm1	38.375	1.66235	0.477469	3.4816	0.000498433	0.00427684
ENSMUSG00000032381	Fam96a	898.438	-0.410647	0.117986	-3.48046	0.000500547	0.00429262
ENSMUSG00000025422	Agap2	258.15	0.635616	0.18265	3.47996	0.000501485	0.00429757
ENSMUSG00000026473	Glul	310.423	-0.616792	0.177246	-3.47986	0.000501679	0.00429757
ENSMUSG00000063714	Sp3os	159.982	0.961276	0.276275	3.47942	0.000502507	0.0043023
ENSMUSG00000028843	Sh3bgrl3	612.861	-0.648237	0.186324	-3.47909	0.000503118	0.00430516
ENSMUSG00000057367	Birc2	767.401	0.517766	0.148897	3.47734	0.000506421	0.00433104
ENSMUSG00000060073	Psma3	2400.05	-0.267399	0.0769026	-3.47711	0.000506854	0.00433236
ENSMUSG00000045503	Sys1	431.898	0.497939	0.143214	3.47688	0.000507285	0.00433367
ENSMUSG00000036469	2001-03-01	36.6868	-1.77362	0.51025	-3.47599	0.000508969	0.00434567
ENSMUSG00000028634	Hivep3	187.84	0.832541	0.239582	3.47498	0.000510899	0.00435974
ENSMUSG00000022956	Atp5o	1871.85	-0.273782	0.0788082	-3.47403	0.000512705	0.00437276
ENSMUSG00000043004	Gng2	790.846	-0.372225	0.107191	-3.47254	0.000515563	0.00439473
ENSMUSG00000075555	Gm10863	5.23792	5.905	1.70064	3.47222	0.000516164	0.00439744
ENSMUSG00000028071	Sh2d2a	113.474	0.981714	0.282766	3.47182	0.000516947	0.00440169
ENSMUSG00000055670	Zzef1	773.749	0.401327	0.115605	3.47154	0.000517479	0.00440381
ENSMUSG00000040537	Adam22	17.4723	2.5426	0.732568	3.4708	0.000518904	0.00441353
ENSMUSG00000032902	Slc16a1	496.715	-0.525104	0.151345	-3.46959	0.000521257	0.00443111
ENSMUSG00000022471	Xrcc6	1206.93	0.315228	0.0909826	3.46471	0.000530804	0.00450981
ENSMUSG00000058301	Upf1	429.748	0.534497	0.154308	3.46383	0.000532547	0.00452214
ENSMUSG00000106166	RP23-465A17.7	193.958	0.746897	0.215723	3.46229	0.000535592	0.00454551
ENSMUSG00000021298	Gpr132	397.903	0.587682	0.169763	3.46179	0.000536601	0.00455159
ENSMUSG00000041870	Ankrd13a	1469.56	-0.321244	0.0928126	-3.46121	0.00053775	0.00455885
ENSMUSG00000004667	Polr2e	634.297	-0.41618	0.120278	-3.46015	0.000539875	0.00457438
ENSMUSG00000049687	Fam109b	73.27	-1.17182	0.338798	-3.45877	0.000542644	0.00459533
ENSMUSG00000070697	Utp3	2714.58	0.270936	0.0783378	3.45856	0.000543075	0.00459648
ENSMUSG00000013974	Mcemp1	5.64101	6.01727	1.74001	3.45819	0.000543823	0.00460031
ENSMUSG00000064945	Rny3	37.6361	2.11658	0.612792	3.45399	0.000552356	0.00466994
ENSMUSG00000020994	Pnn	3503.76	0.231716	0.0671367	3.4514	0.000557689	0.00471248
ENSMUSG00000005043	Sgsh	171.177	-0.841201	0.243809	-3.45025	0.000560071	0.00472746
ENSMUSG00000025372	Baiap2	403.921	-0.516844	0.149797	-3.45031	0.000559943	0.00472746
ENSMUSG00000038437	Mllt6	644.954	0.475272	0.137796	3.44909	0.000562469	0.00474513
ENSMUSG00000041420	Meis3	55.3438	1.35292	0.392467	3.44723	0.000566375	0.00477549
ENSMUSG00000031818	Cox4i1	2608.48	-0.329148	0.095506	-3.44636	0.000568199	0.00478567
ENSMUSG00000078377	Gm4294	568.882	-0.543061	0.157569	-3.44649	0.00056791	0.00478567
ENSMUSG00000075225	Ccdc162	12.8273	3.67108	1.06541	3.44571	0.000569572	0.00479464
ENSMUSG00000033161	Atp1a1	9808.33	-0.262417	0.0761613	-3.44555	0.000569904	0.00479485
ENSMUSG00000035455	Fignl1	261.817	-0.752393	0.218445	-3.44432	0.000572499	0.00481146
ENSMUSG00000048787	Dcun1d3	419.591	0.636072	0.184667	3.44443	0.000572266	0.00481146
ENSMUSG00000025571	Tnrc6c	1446.9	0.328222	0.0953204	3.44336	0.00057453	0.00482593
ENSMUSG00000068184	Ndufaf2	208.303	-0.677336	0.19679	-3.44192	0.000577599	0.00484908
ENSMUSG00000034908	Sidt2	646.03	0.449638	0.130725	3.43956	0.000582667	0.00488899
ENSMUSG00000026623	Lpgat1	726.188	-0.417705	0.121449	-3.43934	0.000583143	0.00489035
ENSMUSG00000096349	Gm22513	15.5337	2.74467	0.798199	3.43858	0.000584766	0.00490132
ENSMUSG00000038349	Plcl1	20.1428	2.84537	0.82753	3.43839	0.000585189	0.00490222
ENSMUSG00000104302	Gm36975	116.651	0.941816	0.273972	3.43764	0.000586804	0.0049131
ENSMUSG00000038319	Kcnh2	71.4837	1.17601	0.342209	3.43652	0.000589244	0.00493087
ENSMUSG00000062683	Atp5g2	282.529	-0.67182	0.195518	-3.43611	0.000590125	0.00493559
ENSMUSG00000036334	Igsf10	5.65038	6.00906	1.75026	3.43324	0.000596419	0.00498555
ENSMUSG00000055044	Pdlim1	765.406	-0.401916	0.117075	-3.43298	0.000596979	0.00498755
ENSMUSG00000097325	Gm16897	19.5857	-2.35413	0.686788	-3.42773	0.000608645	0.00508229
ENSMUSG00000034850	Tmem127	501.679	0.46112	0.134542	3.42734	0.000609528	0.00508692
ENSMUSG00000014907	Naf1	532.219	-0.456867	0.133461	-3.42323	0.000618814	0.00516165
ENSMUSG00000020198	Ap3d1	1158.27	0.320976	0.0937864	3.42242	0.000620662	0.00517211
ENSMUSG00000036752	Tubb4b	435.807	-0.530908	0.155128	-3.42239	0.000620733	0.00517211
ENSMUSG00000072568	Fam84b	336.12	-0.574161	0.167862	-3.42042	0.000625234	0.00520682
ENSMUSG00000039220	Ppp1r10	785.3	0.406307	0.118799	3.42013	0.000625919	0.00520973
ENSMUSG00000027331	Knstrn	217.709	-0.691197	0.202108	-3.41995	0.000626332	0.00521039
ENSMUSG00000022890	Atp5j	1288.9	-0.372256	0.108883	-3.41885	0.000628865	0.00522866
ENSMUSG00000020869	Lrrc59	216.976	-0.667325	0.195322	-3.41654	0.000634229	0.00527044
ENSMUSG00000052031	Tagap1	539.34	0.458989	0.134351	3.41634	0.000634685	0.00527141
ENSMUSG00000037965	Zc3h7a	1334	0.328248	0.0960955	3.41585	0.000635828	0.00527527
ENSMUSG00000075376	Rc3h2	1097.21	0.421225	0.123312	3.41593	0.000635638	0.00527527
ENSMUSG00000056612	Ppp1r14b	1001.86	-0.401998	0.117733	-3.41448	0.000639028	0.00529899
ENSMUSG00000026727	Rsu1	575.029	-0.476838	0.139661	-3.41425	0.000639567	0.00530064
ENSMUSG00000102808	5430420F09Rik	250.568	0.705614	0.206831	3.41154	0.000645964	0.0053508
ENSMUSG00000034192	Lsm3	734.649	-0.378047	0.110837	-3.41085	0.000647608	0.00536156
ENSMUSG00000007050	Lsm2	564.994	-0.426547	0.125063	-3.41065	0.000648083	0.00536264
ENSMUSG00000040123	Zmym5	601.009	0.412144	0.120861	3.41007	0.000649463	0.0053712
ENSMUSG00000050147	F2rl3	102.632	-1.08039	0.316974	-3.40844	0.000653349	0.00540046
ENSMUSG00000022521	Crebbp	3679.84	0.258065	0.0757405	3.40723	0.000656252	0.00541686
ENSMUSG00000022836	Mylk	62.9432	-1.31298	0.385357	-3.40718	0.000656378	0.00541686
ENSMUSG00000086648	Gm15511	72.4493	1.2438	0.365042	3.40727	0.000656154	0.00541686
ENSMUSG00000020180	Snrpd3	1747.48	-0.407839	0.119738	-3.4061	0.00065898	0.00543257
ENSMUSG00000025175	Fn3k	5.64922	-5.89072	1.72941	-3.4062	0.000658742	0.00543257
ENSMUSG00000026222	Sp100	496.587	0.501176	0.147166	3.40552	0.000660393	0.00544133
ENSMUSG00000030980	Knop1	1032.09	-0.331859	0.0974528	-3.40533	0.000660835	0.00544208
ENSMUSG00000032959	Pebp1	1078.75	-0.330821	0.0971758	-3.40436	0.000663196	0.00545864
ENSMUSG00000024347	Psd2	9.64953	4.90254	1.44036	3.4037	0.000664803	0.00546319
ENSMUSG00000031392	Irak1	984.388	-0.386441	0.113533	-3.40378	0.000664614	0.00546319
ENSMUSG00000049307	Fut4	7.5111	-5.31577	1.56176	-3.40371	0.000664772	0.00546319
ENSMUSG00000027018	Hat1	677.712	-0.428421	0.125877	-3.40349	0.000665318	0.00546453
ENSMUSG00000011306	Sugp1	316.771	0.614443	0.180591	3.40241	0.000667953	0.00548328
ENSMUSG00000031708	Tecr	783.934	-0.390733	0.114878	-3.40129	0.000670694	0.00550287
ENSMUSG00000002546	Golga2	812.551	0.387894	0.114073	3.4004	0.000672874	0.00551785
ENSMUSG00000021147	Wdr37	432.556	0.498021	0.146515	3.39911	0.000676045	0.00553295
ENSMUSG00000029716	Tfr2	63.3113	-1.3171	0.387481	-3.39915	0.000675957	0.00553295
ENSMUSG00000044712	Slc38a6	167.418	0.931123	0.273934	3.39908	0.000676138	0.00553295
ENSMUSG00000063458	1700112E06Rik	109.732	-1.00053	0.294337	-3.39928	0.000675645	0.00553295
ENSMUSG00000048707	Tprn	135.163	-0.886158	0.260734	-3.3987	0.00067706	0.00553757
ENSMUSG00000034269	Setd5	2279.79	0.294338	0.0866317	3.39758	0.00067985	0.00555747
ENSMUSG00000037318	Traf3ip3	1263.02	0.326714	0.0962087	3.39588	0.000684076	0.00558908
ENSMUSG00000057335	Cep170	992.826	0.397235	0.117004	3.39505	0.000686172	0.00560326
ENSMUSG00000022636	Alcam	280.259	-0.683218	0.201286	-3.39426	0.000688147	0.00561644
ENSMUSG00000032330	Cox7a2	1903.18	-0.297352	0.087614	-3.39389	0.00068907	0.00562101
ENSMUSG00000029910	Mad2l1	300.979	-0.67682	0.199457	-3.39332	0.000690516	0.00562731
ENSMUSG00000055148	Klf2	400.747	0.697493	0.20555	3.3933	0.000690565	0.00562731
ENSMUSG00000029538	Srsf9	1119.97	-0.329419	0.0970893	-3.39295	0.00069145	0.00563157
ENSMUSG00000038147	Cd84	725.291	0.372468	0.109805	3.39208	0.00069363	0.00564637
ENSMUSG00000036661	Dennd3	228.327	-0.664378	0.195907	-3.39129	0.000695638	0.00565975
ENSMUSG00000031378	Abcd1	360.617	-0.5561	0.164045	-3.38993	0.000699102	0.00568496
ENSMUSG00000049878	Rlf	651.631	0.44283	0.130649	3.38946	0.000700293	0.00569167
ENSMUSG00000097145	9230114K14Rik	263.448	0.673348	0.198816	3.38679	0.000707147	0.00574437
ENSMUSG00000015143	Actn1	2536.26	-0.276474	0.0816617	-3.3856	0.000710225	0.00576335
ENSMUSG00000100826	Snhg14	178.203	0.804211	0.237537	3.38563	0.000710163	0.00576335
ENSMUSG00000026229	Psmd1	2195.36	-0.287683	0.0850904	-3.38091	0.000722454	0.00585953
ENSMUSG00000042379	Esm1	836.996	0.367666	0.108774	3.38009	0.000724617	0.00587401
ENSMUSG00000041498	Kif14	339.394	-0.764432	0.226173	-3.37985	0.000725247	0.00587605
ENSMUSG00000079083	Jrkl	311.517	0.576145	0.170548	3.37819	0.000729638	0.00590855
ENSMUSG00000056592	Zfp658	67.462	1.19627	0.354154	3.37783	0.000730593	0.0059132
ENSMUSG00000026417	Pigr	5.08802	5.8668	1.73718	3.37719	0.000732295	0.00592389
ENSMUSG00000027639	Samhd1	526.686	-0.444095	0.131528	-3.37643	0.000734336	0.00593731
ENSMUSG00000011960	Ccnt1	2544.24	0.278849	0.0826041	3.37572	0.000736218	0.00594944
ENSMUSG00000030079	Ruvbl1	420.376	-0.514997	0.152568	-3.37552	0.000736756	0.00595069
ENSMUSG00000056260	Lrif1	558.95	0.446751	0.132375	3.3749	0.000738426	0.00596109
ENSMUSG00000084866	A930006K02Rik	109.218	1.02405	0.303552	3.37356	0.000742028	0.00598706
ENSMUSG00000024359	Hspa9	1977.65	-0.288302	0.0854667	-3.37326	0.000742826	0.00598728
ENSMUSG00000032093	Cd3e	156.159	0.989525	0.293339	3.37331	0.0007427	0.00598728
ENSMUSG00000031221	Igbp1	896.703	-0.413776	0.122677	-3.3729	0.000743812	0.00599212
ENSMUSG00000027263	Tubgcp4	527.168	0.47953	0.142192	3.37242	0.000745108	0.00599945
ENSMUSG00000085900	A930041C12Rik	23.5662	2.11693	0.627865	3.37163	0.000747248	0.00601356
ENSMUSG00000018412	Kansl1	966.657	0.40329	0.119641	3.37082	0.000749443	0.00602592
ENSMUSG00000022358	Fbxo32	286.775	0.615364	0.182566	3.37064	0.000749946	0.00602592
ENSMUSG00000062510	Nsl1	116.679	-0.973274	0.288748	-3.37067	0.000749863	0.00602592
ENSMUSG00000014444	Piezo1	56.3467	1.37572	0.408168	3.37049	0.000750357	0.00602611
ENSMUSG00000087004	Gm14154	4.99237	5.83785	1.73215	3.37029	0.000750886	0.00602725
ENSMUSG00000030750	Nsmce1	478.879	-0.46222	0.137287	-3.36683	0.000760384	0.00609998
ENSMUSG00000042625	Safb2	1155.19	0.307465	0.0913253	3.3667	0.000760732	0.00609998
ENSMUSG00000007836	Hnrnpa0	5941.91	-0.202143	0.0600974	-3.36359	0.000769365	0.00616026
ENSMUSG00000022686	B3gnt5	329.758	-0.565242	0.168056	-3.36342	0.000769835	0.00616026
ENSMUSG00000025907	Rb1cc1	2126.51	0.286994	0.0853269	3.36346	0.000769716	0.00616026
ENSMUSG00000085423	Gm15735	12.6563	3.29288	0.97902	3.36345	0.000769759	0.00616026
ENSMUSG00000015474	Ppt2	38.3683	1.68818	0.501966	3.36314	0.000770601	0.00616323
ENSMUSG00000000290	Itgb2	415.023	0.516032	0.153455	3.36276	0.000771666	0.00616857
ENSMUSG00000025159	Mms19	573.656	0.434783	0.129319	3.3621	0.000773513	0.00618016
ENSMUSG00000047909	Ankrd16	502.823	0.508059	0.151127	3.36181	0.000774331	0.00618351
ENSMUSG00000105644	RP24-174D10.3	365.481	-0.601524	0.179	-3.36047	0.000778097	0.00621039
ENSMUSG00000005371	Fbxo11	780.433	0.406465	0.121129	3.35563	0.000791857	0.00631698
ENSMUSG00000000782	Tcf7	5938.82	0.227368	0.0677775	3.35462	0.000794732	0.00633666
ENSMUSG00000030695	Aldoa	4375.37	-0.69285	0.206555	-3.35431	0.000795626	0.00634054
ENSMUSG00000085771	C230066G23Rik	24.5429	2.27166	0.677358	3.3537	0.000797375	0.00635122
ENSMUSG00000030231	Plekha5	418.686	0.517155	0.154216	3.35344	0.000798127	0.00635257
ENSMUSG00000090394	4930523C07Rik	523.776	0.468487	0.139707	3.35336	0.000798361	0.00635257
ENSMUSG00000052429	Prmt1	1350.95	-0.34922	0.104189	-3.35181	0.00080286	0.0063851
ENSMUSG00000005370	Msh6	1248.68	-0.320347	0.0956051	-3.35073	0.000805979	0.00640663
ENSMUSG00000004591	Pkn2	1486.41	0.307526	0.091825	3.34905	0.000810906	0.00644249
ENSMUSG00000033658	Ddx19b	299.535	0.581145	0.173605	3.34751	0.00081542	0.00647505
ENSMUSG00000030556	Lrrc28	214.59	0.659494	0.197168	3.34483	0.000823344	0.00653464
ENSMUSG00000030207	8430419L09Rik	113.168	1.03249	0.308699	3.34464	0.000823891	0.00653564
ENSMUSG00000107205	RP23-382I10.1	101.081	1.11649	0.333853	3.34427	0.000825007	0.00654115
ENSMUSG00000041754	Trem3	5.48405	5.97618	1.78745	3.34342	0.000827531	0.00655782
ENSMUSG00000007617	Homer1	118.311	-1.0707	0.320287	-3.34293	0.000828988	0.00656602
ENSMUSG00000038462	Uqcrfs1	1017.57	-0.321641	0.0962578	-3.34146	0.000833405	0.00659094
ENSMUSG00000041238	Rbbp8	603.992	-0.435703	0.130389	-3.34156	0.000833084	0.00659094
ENSMUSG00000079186	Gzmc	18.9458	2.49392	0.746324	3.3416	0.000832965	0.00659094
ENSMUSG00000076431	Sox4	3268.93	-0.23071	0.0690487	-3.34126	0.000833995	0.00659225
ENSMUSG00000079111	Kdelr2	545.772	-0.44007	0.13175	-3.3402	0.000837186	0.00661411
ENSMUSG00000015806	Qdpr	530.246	-0.516253	0.154621	-3.33882	0.000841349	0.00664362
ENSMUSG00000020032	Nuak1	25.8289	-2.21336	0.663332	-3.33673	0.000847695	0.00668694
ENSMUSG00000034394	Lif	86.8995	1.23667	0.370608	3.33686	0.000847321	0.00668694
ENSMUSG00000035776	Cd99l2	58.3406	1.44978	0.43502	3.33268	0.000860149	0.00678174
ENSMUSG00000062082	Cd200r4	14.82	2.86315	0.859257	3.33212	0.000861868	0.00679185
ENSMUSG00000054434	Tmem120b	25.4915	2.39664	0.719367	3.3316	0.000863496	0.00680124
ENSMUSG00000019832	Rab32	88.4222	-1.00014	0.300233	-3.3312	0.000864724	0.00680745
ENSMUSG00000064043	Trerf1	645.626	0.407294	0.122311	3.32999	0.000868494	0.00683368
ENSMUSG00000035637	Grhpr	227.033	-0.775989	0.233069	-3.32944	0.000870203	0.00684366
ENSMUSG00000053617	Sh3pxd2a	222.476	0.653933	0.196423	3.32921	0.000870939	0.00684599
ENSMUSG00000001105	Ift20	2358.28	-0.245951	0.0739535	-3.32575	0.000881797	0.00692083
ENSMUSG00000007670	Khsrp	1334.73	-0.323321	0.0972145	-3.32585	0.000881489	0.00692083
ENSMUSG00000056529	Ptafr	15.9426	-2.51249	0.75546	-3.32577	0.000881739	0.00692083
ENSMUSG00000044244	Il20rb	47.6994	1.49806	0.450468	3.32557	0.000882384	0.00692195
ENSMUSG00000050473	Slc35d3	32.8175	-2.25913	0.679541	-3.3245	0.000885784	0.00694512
ENSMUSG00000025326	Ube3a	4008.65	0.213998	0.0643924	3.32334	0.000889459	0.00697042
ENSMUSG00000097354	2310001H17Rik	787.932	0.486584	0.146524	3.32085	0.000897449	0.00702949
ENSMUSG00000091993	B930036N10Rik	50.4533	1.36381	0.410738	3.3204	0.000898872	0.00703709
ENSMUSG00000020642	Rnf144a	1163.45	-0.345495	0.104064	-3.32001	0.000900127	0.00704151
ENSMUSG00000040809	Chil3	18.0431	2.53778	0.764403	3.31995	0.000900342	0.00704151
ENSMUSG00000079523	Tmsb10	1255.54	0.434531	0.130904	3.31947	0.000901887	0.00705005
ENSMUSG00000000628	Hk2	860.023	-0.344918	0.104005	-3.31636	0.000911984	0.00712539
ENSMUSG00000028760	Eif4g3	3224.07	0.361996	0.109197	3.31508	0.000916159	0.00715442
ENSMUSG00000021870	Slmap	1073.92	0.326123	0.0983829	3.31483	0.000916985	0.00715727
ENSMUSG00000104271	Gm37891	11.5646	-3.41229	1.0305	-3.3113	0.000928639	0.00724459
ENSMUSG00000043157	Arl11	170.715	-0.76913	0.23237	-3.30994	0.000933174	0.00727632
ENSMUSG00000087305	A430035B10Rik	44.4959	1.41557	0.427716	3.30961	0.000934266	0.00728119
ENSMUSG00000023915	Tnfrsf21	304.211	-0.633358	0.191393	-3.3092	0.000935615	0.00728804
ENSMUSG00000056735	A930024E05Rik	112.229	1.04589	0.316081	3.30893	0.000936526	0.00729149
ENSMUSG00000066406	Akap13	7062.33	0.210271	0.063617	3.30527	0.000948847	0.00738372
ENSMUSG00000027011	Ube2e3	996.967	-0.38471	0.116518	-3.30173	0.000960902	0.00747379
ENSMUSG00000030934	Oat	406.991	-0.555257	0.168248	-3.30022	0.000966089	0.00751037
ENSMUSG00000027496	Aurka	209.159	-0.695666	0.210834	-3.29959	0.000968272	0.00752359
ENSMUSG00000029810	Tmem176b	2160.82	0.299245	0.0907103	3.29891	0.000970615	0.00753426
[truncated: 44,080 more rows]
