# Supplementary material for: Single-cell CRISPR screening characterizes transcriptional deregulation in T-cell acute lymphoblastic leukemia
Source: Research Square preprint supplement (doi:10.21203/rs.3.rs-2615765/v2), 2023-12-21
Supplement: Supplementary file 2 [file a245b944137274f848bce847.xlsx]

## Sheet: gRNA list screen 1
Number	Name	Sequence
1	Cdkn2a_gRNA1_Fw	CACCGCAGCTCTTCTGCTCAACTA
2	Cdkn2a_gRNA1_Rv	AAACTAGTTGAGCAGAAGAGCTGC
3	Cdkn2a_gRNA2_Fw	CACCGCGCTGCGTCGTGCACCGGG
4	Cdkn2a_gRNA2_Rv	AAACCCCGGTGCACGACGCAGCGC
5	Cdkn2a_gRNA3_Fw	CACCGGAAGGCTTCCTGGACACGC
6	Cdkn2a_gRNA3_Rv	AAACGCGTGTCCAGGAAGCCTTCC
7	Cdkn2a_gRNA4_Fw	CACCGCAGCACCACCAGCGTGTCC
8	Cdkn2a_gRNA4_Rv	AAACGGACACGCTGGTGGTGCTGC
9	Cdkn2a_gRNA5_Fw	CACCGAGGCTTCCTGGACACGCTGG
10	Cdkn2a_gRNA5_Rv	AAACCCAGCGTGTCCAGGAAGCCTC
11	E2f_gRNA1_Fw	CACCGAGCAGCACGTCAGAATCGCG
12	E2f_gRNA1_Rv	AAACCGCGATTCTGACGTGCTGCTC
13	E2f_gRNA2_Fw	CACCGCCCCAGGTGTGAAATCTCCG
14	E2f_gRNA2_Rv	AAACCGGAGATTTCACACCTGGGGC
15	E2f_gRNA3_Fw	CACCGACCAATCCAAGGATATCGCT
16	E2f_gRNA3_Rv	AAACAGCGATATCCTTGGATTGGTC
17	E2f_gRNA4_Fw	CACCGGAGATGATGACGATCTGCG
18	E2f_gRNA4_Rv	AAACCGCAGATCGTCATCATCTCC
19	E2f_gRNA5_Fw	CACCGTTCTGCTACAGGTGAAACGG
20	E2f_gRNA5_Rv	AAACCCGTTTCACCTGTAGCAGAAC
21	Fos_gRNA1_Fw	CACCGAAGAGAAACGGAGAATCCGA
22	Fos_gRNA1_Rv	AAACTCGGATTCTCCGTTTCTCTTC
23	Fos_gRNA2_Fw	CACCGTGCTGGGGCTTACGCCAGAG
24	Fos_gRNA2_Rv	AAACCTCTGGCGTAAGCCCCAGCAC
25	Fos_gRNA3_Fw	CACCGCAGACCTCCAGTCAAATCCA
26	Fos_gRNA3_Rv	AAACTGGATTTGACTGGAGGTCTGC
27	Fos_gRNA4_Fw	CACCGTGTCACCGTGGGGATAAAGT
28	Fos_gRNA4_Rv	AAACACTTTATCCCCACGGTGACAC
29	Fos_gRNA5_Fw	CACCGCTGACAGATACACTCCAAG
30	Fos_gRNA5_Rv	AAACCTTGGAGTGTATCTGTCAGC
31	Hoxa1_gRNA1_Fw	CACCGCTTGGACCACAACTCGAGT
32	Hoxa1_gRNA1_Rv	AAACACTCGAGTTGTGGTCCAAGC
33	Hoxa1_gRNA2_Fw	CACCGCTGGACCATGGGAGTCGAG
34	Hoxa1_gRNA2_Rv	AAACCTCGACTCCCATGGTCCAGC
35	Hoxa1_gRNA3_Fw	CACCGCGGCGACGACCGCTTCCTAG
36	Hoxa1_gRNA3_Rv	AAACCTAGGAAGCGGTCGTCGCCGC
37	Hoxa1_gRNA4_Fw	CACCGTATGAGTGGTGAATGTACTG
38	Hoxa1_gRNA4_Rv	AAACCAGTACATTCACCACTCATAC
39	Hoxa1_gRNA5_Fw	CACCGATTGGAAAGTTGTAATCCCA
40	Hoxa1_gRNA5_Rv	AAACTGGGATTACAACTTTCCAATC
41	Il7r_gRNA1_Fw	CACCGGGAGACTAGGCCATACGAC
42	Il7r_gRNA1_Rv	AAACGTCGTATGGCCTAGTCTCCC
43	Il7r_gRNA2_Fw	CACCGCAGAACCCAAGAATCAAGGT
44	Il7r_gRNA2_Rv	AAACACCTTGATTCTTGGGTTCTGC
45	Il7r_gRNA3_Fw	CACCGCTGGAATTTCAAATATGGTG
46	Il7r_gRNA3_Rv	AAACCACCATATTTGAAATTCCAGC
47	Il7r_gRNA4_Fw	CACCGTGGAATAAAGATACATGCT
48	Il7r_gRNA4_Rv	AAACAGCATGTATCTTTATTCCAC
49	Il7r_gRNA5_Fw	CACCGAGACCTAGAAGATGCAGACG
50	Il7r_gRNA5_Rv	AAACCGTCTGCATCTTCTAGGTCTC
51	Jun_gRNA1_Fw	CACCGCAGTCCGAGAGCGGTGCCTA
52	Jun_gRNA1_Rv	AAACTAGGCACCGCTCTCGGACTGC
53	Jun_gRNA2_Fw	CACCGCAGCTTGAGCAGCCCGACGT
54	Jun_gRNA2_Rv	AAACACGTCGGGCTGCTCAAGCTGC
55	Jun_gRNA3_Fw	CACCGTGTGCCGCGGAGGTGACACT
56	Jun_gRNA3_Rv	AAACAGTGTCACCTCCGCGGCACAC
57	Jun_gRNA4_Fw	CACCGTTCTTGGGGCACAAGAACT
58	Jun_gRNA4_Rv	AAACAGTTCTTGTGCCCCAAGAAC
59	Jun_gRNA5_Fw	CACCGTGCTGCACCGGGATCTGTTG
60	Jun_gRNA5_Rv	AAACCAACAGATCCCGGTGCAGCAC
61	Kit_gRNA1_Fw	CACCGAAGCACAATAGCTGGCACCG
62	Kit_gRNA1_Rv	AAACCGGTGCCAGCTATTGTGCTTC
63	Kit_gRNA2_Fw	CACCGACACGTAAATAGAACTCGTG
64	Kit_gRNA2_Rv	AAACCACGAGTTCTATTTACGTGTC
65	Kit_gRNA3_Fw	CACCGTGGTTGCAGCTGGCGCGATG
66	Kit_gRNA3_Rv	AAACCATCGCGCCAGCTGCAACCAC
67	Kit_gRNA4_Fw	CACCGACTACAGTATTTGTAACCGA
68	Kit_gRNA4_Rv	AAACTCGGTTACAAATACTGTAGTC
69	Kit_gRNA5_Fw	CACCGGCCTCAACGACCTTCCCGA
70	Kit_gRNA5_Rv	AAACTCGGGAAGGTCGTTGAGGCC
71	Myc_gRNA1_Fw	CACCGCTGTACGGAGTCGTAGTCG
72	Myc_gRNA1_Rv	AAACCGACTACGACTCCGTACAGC
73	Myc_gRNA2_Fw	CACCGCATCATCTCCAGCTGATCGG
74	Myc_gRNA2_Rv	AAACCCGATCAGCTGGAGATGATGC
75	Myc_gRNA3_Fw	CACCGCGAGTGCATTGACCCCTCAG
76	Myc_gRNA3_Rv	AAACCTGAGGGGTCAATGCACTCGC
77	Myc_gRNA4_Fw	CACCGAGAGGCAAACCCCTGCCAAG
78	Myc_gRNA4_Rv	AAACCTTGGCAGGGGTTTGCCTCTC
79	Myc_gRNA5_Fw	CACCGCTGCTCTCCATCCTATGTTG
80	Myc_gRNA5_Rv	AAACCAACATAGGATGGAGAGCAGC
81	Notch1_gRNA1_Fw	CACCGATAGGCAGGTGGGACTACGT
82	Notch1_gRNA1_Rv	AAACACGTAGTCCCACCTGCCTATC
83	Notch1_gRNA2_Fw	CACCGACCTGCACTGACTATCTCGG
84	Notch1_gRNA2_Rv	AAACCCGAGATAGTCAGTGCAGGTC
85	Notch1_gRNA3_Fw	CACCGATATACATACCCGTCCACTC
86	Notch1_gRNA3_Rv	AAACGAGTGGACGGGTATGTATATC
87	Notch1_gRNA4_Fw	CACCGTGCTGAGCATGTACCCGAG
88	Notch1_gRNA4_Rv	AAACCTCGGGTACATGCTCAGCAC
89	Notch1_gRNA5_Fw	CACCGCTTCACAGGTCAAACCTGCG
90	Notch1_gRNA5_Rv	AAACCGCAGGTTTGACCTGTGAAGC
91	Pten_gRNA1_Fw	CACCGCCTCCAATTCAGGACCCACG
92	Pten_gRNA1_Rv	AAACCGTGGGTCCTGAATTGGAGGC
93	Pten_gRNA2_Fw	CACCGTGTGCATATTTATTGCATCG
94	Pten_gRNA2_Rv	AAACCGATGCAATAAATATGCACAC
95	Pten_gRNA3_Fw	CACCGACTATTCCAATGTTCAGTGG
96	Pten_gRNA3_Rv	AAACCCACTGAACATTGGAATAGTC
97	Pten_gRNA4_Fw	CACCGGTTTGATAAGTTCTAGCTG
98	Pten_gRNA4_Rv	AAACCAGCTAGAACTTATCAAACC
99	Pten_gRNA5_Fw	CACCGAGTCACAATTCCCAGTCAG
100	Pten_gRNA5_Rv	AAACCTGACTGGGAATTGTGACTC
101	Ptprc_gRNA1_Fw	CACCGTTTCACAATGGAGTGTACGA
102	Ptprc_gRNA1_Rv	AAACTCGTACACTCCATTGTGAAAC
103	Ptprc_gRNA2_Fw	CACCGTAGCAGAAATCTTATATCG
104	Ptprc_gRNA2_Rv	AAACCGATATAAGATTTCTGCTAC
105	Ptprc_gRNA3_Fw	CACCGTTGTCAAGCTAAGGCGACAG
106	Ptprc_gRNA3_Rv	AAACCTGTCGCCTTAGCTTGACAAC
107	Ptprc_gRNA4_Fw	CACCGATCAGATGATTATAACCGTG
108	Ptprc_gRNA4_Rv	AAACCACGGTTATAATCATCTGATC
109	Ptprc_gRNA5_Fw	CACCGACCACAACGAAGCAAACATG
110	Ptprc_gRNA5_Rv	AAACCATGTTTGCTTCGTTGTGGTC
111	Runx1_gRNA1_Fw	CACCGCGGTCCCTACACTAGGACAT
112	Runx1_gRNA1_Rv	AAACATGTCCTAGTGTAGGGACCGC
113	Runx1_gRNA2_Fw	CACCGTGCGCACTAGCTCGCCAGGG
114	Runx1_gRNA2_Rv	AAACCCCTGGCGAGCTAGTGCGCAC
115	Runx1_gRNA3_Fw	CACCGACGACCTCAGGTTTGTCGGG
116	Runx1_gRNA3_Rv	AAACCCCGACAAACCTGAGGTCGTC
117	Runx1_gRNA4_Fw	CACCGAGGAGTACCTTGAAAGCGAT
118	Runx1_gRNA4_Rv	AAACATCGCTTTCAAGGTACTCCTC
119	Runx1_gRNA5_Fw	CACCGGCAGTGGAGTGGTTCAAGG
120	Runx1_gRNA5_Rv	AAACCCTTGAACCACTCCACTGCC
121	Spi1_gRNA1_Fw	CACCGTGGCACCATGGGAGTATCG
122	Spi1_gRNA1_Rv	AAACCGATACTCCCATGGTGCCAC
123	Spi1_gRNA2_Fw	CACCGTGATAAGGGAAGCACATCCG
124	Spi1_gRNA2_Rv	AAACCGGATGTGCTTCCCTTATCAC
125	Spi1_gRNA3_Fw	CACCGTAAGTAACCAAGTCATCCGA
126	Spi1_gRNA3_Rv	AAACTCGGATGACTTGGTTACTTAC
127	Spi1_gRNA4_Fw	CACCGCATGACTACTACTCCTTCGT
128	Spi1_gRNA4_Rv	AAACACGAAGGAGTAGTAGTCATGC
129	Spi1_gRNA5_Fw	CACCGTTGTTGTGGACATGGTGTG
130	Spi1_gRNA5_Rv	AAACCACACCATGTCCACAACAAC
131	Stat5b_gRNA1_Fw	CACCGAGTCCCTGAAACGAATCAAG
132	Stat5b_gRNA1_Rv	AAACCTTGATTCGTTTCAGGGACTC
133	Stat5b_gRNA2_Fw	CACCGCGTGAACAATCACCACCACC
134	Stat5b_gRNA2_Rv	AAACGGTGGTGGTGATTGTTCACGC
135	Stat5b_gRNA3_Fw	CACCGATCGAAAGCCAAGCCTGGT
136	Stat5b_gRNA3_Rv	AAACACCAGGCTTGGCTTTCGATC
137	Stat5b_gRNA4_Fw	CACCGTACAGCGAACCAGCTCCATG
138	Stat5b_gRNA4_Rv	AAACCATGGAGCTGGTTCGCTGTAC
139	Stat5b_gRNA5_Fw	CACCGACACTGCAGCAGTACCGAG
140	Stat5b_gRNA5_Rv	AAACCTCGGTACTGCTGCAGTGTC
141	Suz12_gRNA1_Fw	CACCGAGGAGCTGTAGACTTATCGT
142	Suz12_gRNA1_Rv	AAACACGATAAGTCTACAGCTCCTC
143	Suz12_gRNA2_Fw	CACCGAGTCCCTACTGGTAAAAAGC
144	Suz12_gRNA2_Rv	AAACGCTTTTTACCAGTAGGGACTC
145	Suz12_gRNA3_Fw	CACCGAGAAATCTATATATCTGTGT
146	Suz12_gRNA3_Rv	AAACACACAGATATATAGATTTCTC
147	Suz12_gRNA4_Fw	CACCGCTTCGGGCGGCAAATCCGG
148	Suz12_gRNA4_Rv	AAACCCGGATTTGCCGCCCGAAGC
149	Suz12_gRNA5_Fw	CACCGGCAGTTCAGAGTGCACCAC
150	Suz12_gRNA5_Rv	AAACGTGGTGCACTCTGAACTGCC
151	Tal1_gRNA1_Fw	CACCGAGAAATCTCCATCTCATATG
152	Tal1_gRNA1_Rv	AAACCATATGAGATGGAGATTTCTC
153	Tal1_gRNA2_Fw	CACCGCCAACAGCCGGGAACGATGG
154	Tal1_gRNA2_Rv	AAACCCATCGTTCCCGGCTGTTGGC
155	Tal1_gRNA3_Fw	CACCGCTTCGGCTGCTACTGCGTCG
156	Tal1_gRNA3_Rv	AAACCGACGCAGTAGCAGCCGAAGC
157	Tal1_gRNA4_Fw	CACCGCGCTCCTAGCTCGATGACG
158	Tal1_gRNA4_Rv	AAACCGTCATCGAGCTAGGAGCGC
159	Tal1_gRNA5_Fw	CACCGTAAGGCTATAGAGCAGCGCT
160	Tal1_gRNA5_Rv	AAACAGCGCTGCTCTATAGCCTTAC
161	Tcf7_gRNA1_Fw	CACCGCTTACCAGCTCACAGTATGG
162	Tcf7_gRNA1_Rv	AAACCCATACTGTGAGCTGGTAAGC
163	Tcf7_gRNA2_Fw	CACCGATAAAATCCAGAGAGATCGG
164	Tcf7_gRNA2_Rv	AAACCCGATCTCTCTGGATTTTATC
165	Tcf7_gRNA3_Fw	CACCGCTGCTGAAATGTTCGTAGAG
166	Tcf7_gRNA3_Rv	AAACCTCTACGAACATTTCAGCAGC
167	Tcf7_gRNA4_Fw	CACCGTGTGCACCTCAGGAAAACAC
168	Tcf7_gRNA4_Rv	AAACGTGTTTTCCTGAGGTGCACAC
169	Tcf7_gRNA5_Fw	CACCGAAGTGCTGTCTATATCCGC
170	Tcf7_gRNA5_Rv	AAACGCGGATATAGACAGCACTTC
171	Tlx1_gRNA1_Fw	CACCGAGTAACCGCAGATACACAA		non-targeting, negative control
172	Tlx1_gRNA1_Rv	AAACTTGTGTATCTGCGGTTACTC		non-targeting, negative control
173	Tlx1_gRNA2_Fw	CACCGCTCAACAGCCCCGACCAGGG		non-targeting, negative control
174	Tlx1_gRNA2_Rv	AAACCCCTGGTCGGGGCTGTTGAGC		non-targeting, negative control
175	Tlx1_gRNA3_Fw	CACCGAGGCGCGTGAAGGATGTGCG		non-targeting, negative control
176	Tlx1_gRNA3_Rv	AAACCGCACATCCTTCACGCGCCTC		non-targeting, negative control
177	Tlx1_gRNA4_Fw	CACCGCAGGCACAGAGGGTACTGT		non-targeting, negative control
178	Tlx1_gRNA4_Rv	AAACACAGTACCCTCTGTGCCTGC		non-targeting, negative control
179	Tlx1_gRNA5_Fw	CACCGGAGGCGCCTACACTTACGG		non-targeting, negative control
180	Tlx1_gRNA5_Rv	AAACCCGTAAGTGTAGGCGCCTCC		non-targeting, negative control
181	Tlx3_gRNA1_Fw	CACCGACCCGGGAAAAGGACGTGCG		non-targeting, negative control
182	Tlx3_gRNA1_Rv	AAACCGCACGTCCTTTTCCCGGGTC		non-targeting, negative control
183	Tlx3_gRNA2_Fw	CACCGTGAAGCGGTCCTTTACAAAG		non-targeting, negative control
184	Tlx3_gRNA2_Rv	AAACCTTTGTAAAGGACCGCTTCAC		non-targeting, negative control
185	Tlx3_gRNA3_Fw	CACCGTTACAGTGTCAACCTAAGCT		non-targeting, negative control
186	Tlx3_gRNA3_Rv	AAACAGCTTAGGTTGACACTGTAAC		non-targeting, negative control
187	gLuc3 Rev	aaacGGAACCAGGGCGTATCTCTT		non-targeting, negative control
188	gLuc3 Fw	caccAAGAGATACGCCCTGGTTCC		non-targeting, negative control
189	gLuc2 Rev	aaacTATGCAGTTGCTCTCCAGCG		non-targeting, negative control
190	gLuc2 Fw	caccCGCTGGAGAGCAACTGCATA		non-targeting, negative control
191	gLuc1 Rev	aaacCCTGAAGGCTCCTCAGAAACAGC		non-targeting, negative control
192	gLuc1 Fw	caccGCTGTTTCTGAGGAGCCTTCAGG		non-targeting, negative control
