# Supplementary material for: Single-cell CRISPR screening characterizes transcriptional deregulation in T-cell acute lymphoblastic leukemia
Source: Research Square preprint supplement (doi:10.21203/rs.3.rs-2615765/v2), 2023-12-21
Supplement: Supplementary file 3 [file dfe969ef6247b9ac1b3e2f4a.xlsx]

## Sheet: Sheet1
Target gene	Il7r			Stat5b
Gene set	NES	p-value	FDR q	NES	p-value	FDR q
STAT_SIGNATURE_BORNSCHEIN	-2.09	0	0	-1.74	0	0
HALLMARK_IL2_STAT5_SIGNALING	-1.73	0	0.001	-1.45	0.004	0.125
GOBP_ACTIVATION_OF_JANUS_KINASE_ACTIVITY	-1.48	0.03	0.072	-1.46	0.052	0.214
HALLMARK_IL6_JAK_STAT3_SIGNALING	-1.23	0.111	0.135	-1.14	0.304	0.597
JAK_STAT_CASCADE	-1.04	0.394	0.463	-1.22	0.228	0.556
KEGG_JAK_STAT_SIGNALING PATHWAY	-1.01	0.445	0.447	-1.02	0.451	0.622
Target gene	Notch1
Gene set	NES	p-value	FDR q
NOTCH_SIGNATURE_BORNSCHEIN	-1.82	0	0
HALLMARK_NOTCH_SIGNALING	-1.61	0.007	0.017
GOBP_NOTCH_SIGNALING_PATHWAY	-1.54	0	0.02
REACTOME_SIGNALING_BY_NOTCH	-1.41	0.014	0.067
KEGG_NOTCH_SIGNALING PATHWAY	-1.4	0.044	0.054
BIOCARTA_NOTCH_PATHWAY	-1.25	0.181	0.159
WP_NOTCH_SIGNALING_PATHWAY	-1.17	0.23	0.194
Target gene	Myc
Gene set	NES	p-value	FDR q
HALLMARK_MYC_TARGETS_V1	-1.96	0	0
DANG_MYC_TARGETS_UP	-1.91	0	0
MYC_SIGNATURE_BORNSCHEIN	-1.72	0	0
HALLMARK_MYC_TARGETS_V2	-1.68	0	0
PID_MYC_ACTIV_PATHWAY	-1.62	0.003	0.003
COLLER_MYC_TARGETS_UP	-1.59	0.009	0.005
BILD_MYC_ONCOGENIC_SIGNATURE	-1.41	0.019	0.05
