# Supplementary material for: Single-cell CRISPR screening characterizes transcriptional deregulation in T-cell acute lymphoblastic leukemia
Source: Research Square preprint supplement (doi:10.21203/rs.3.rs-2615765/v2), 2023-12-21
Supplement: Supplementary file 4 [file f4016a5bc7cebfb248ae3760.xlsx]

## Sheet: gRNA list screen 2
Name	Sequence		Name	Sequence
Arid1a_gRNA1_Fw	caccGCAGCTGCGAAGATATCGGG		Arid1a_gRNA1_Rv	aaacCCCGATATCTTCGCAGCTGC
Arid1a_gRNA2_Fw	caccGCAGCAGAACTCGCACGACCA		Arid1a_gRNA2_Rv	aaacTGGTCGTGCGAGTTCTGCTGC
Arid1a_gRNA3_Fw	caccGCCTGCTGGCCATACGCACTG		Arid1a_gRNA3_Rv	aaacCAGTGCGTATGGCCAGCAGGC
Arid1a_gRNA4_Fw	caccGTACCCAAATATGAATCAAGG		Arid1a_gRNA4_Rv	aaacCCTTGATTCATATTTGGGTAC
Arid1a_gRNA5_Fw	caccGAGGCATGAGATTTGGCTGAG		Arid1a_gRNA5_Rv	aaacCTCAGCCAAATCTCATGCCTC
Asxl2_gRNA1_Fw	caccGTGGCGATTCTCAGTGATACG		Asxl2_gRNA1_Rv	aaacCGTATCACTGAGAATCGCCAC
Asxl2_gRNA2_Fw	caccGTCTTCTTTACACTCGGACTG		Asxl2_gRNA2_Rv	aaacCAGTCCGAGTGTAAAGAAGAC
Asxl2_gRNA3_Fw	caccGAACTCCTAGGGTCTTGCAAG		Asxl2_gRNA3_Rv	aaacCTTGCAAGACCCTAGGAGTTC
Asxl2_gRNA4_Fw	caccGTATACACGCCCATTCTACC		Asxl2_gRNA4_Rv	aaacGGTAGAATGGGCGTGTATAC
Asxl2_gRNA5_Fw	caccGAATGGTCCCTCCAACTGAGG		Asxl2_gRNA5_Rv	aaacCCTCAGTTGGAGGGACCATTC
Atm_gRNA1_Fw	caccGTGCAAGATACACATGAATCG		Atm_gRNA1_Rv	aaacCGATTCATGTGTATCTTGCAC
Atm_gRNA2_Fw	caccGATAATTCATGCTGTcaccAG		Atm_gRNA2_Rv	aaacCTGGTGACAGCATGAATTATC
Atm_gRNA3_Fw	caccGAGAGCACACGGATTGCTCA		Atm_gRNA3_Rv	aaacTGAGCAATCCGTGTGCTCTC
Atm_gRNA4_Fw	caccGAGTATAAATAACATCGCGA		Atm_gRNA4_Rv	aaacTCGCGATGTTATTTATACTC
Atm_gRNA5_Fw	caccGGATCACGGAGTACATCCAG		Atm_gRNA5_Rv	aaacCTGGATGTACTCCGTGATCC
Baz1a_gRNA1_Fw	caccGCGGTGCATAAGCCAAATCGG		Baz1a_gRNA1_Rv	aaacCCGATTTGGCTTATGCACCGC
Baz1a_gRNA2_Fw	caccGAGTCCTGCTAACAGGCGACG		Baz1a_gRNA2_Rv	aaacCGTCGCCTGTTAGCAGGACTC
Baz1a_gRNA3_Fw	caccGAAGTACAGGTATCAGAAACG		Baz1a_gRNA3_Rv	aaacCGTTTCTGATACCTGTACTTC
Baz1a_gRNA4_Fw	caccGAAGATGTTAGTACAGGCGA		Baz1a_gRNA4_Rv	aaacTCGCCTGTACTAACATCTTC
Baz1a_gRNA5_Fw	caccGCTCGTATCGCCCATTCTCCA		Baz1a_gRNA5_Rv	aaacTGGAGAATGGGCGATACGAGC
Bcl11b_gRNA1_Fw	caccGCTGAGAGCCCGTCGTCTGAG		Bcl11b_gRNA1_Rv	aaacCTCAGACGACGGGCTCTCAGC
Bcl11b_gRNA2_Fw	caccGCGGGAAGTTCATCTGACAC		Bcl11b_gRNA2_Rv	aaacGTGTCAGATGAACTTCCCGC
Bcl11b_gRNA3_Fw	caccGCCACGGTCTCCGGCCCGAG		Bcl11b_gRNA3_Rv	aaacCTCGGGCCGGAGACCGTGGC
Bcl11b_gRNA4_Fw	caccGTTGTGCAAATGTAGCTGGA		Bcl11b_gRNA4_Rv	aaacTCCAGCTACATTTGCACAAC
Bcl11b_gRNA5_Fw	caccGcaccTACTGTcaccCACGAA		Bcl11b_gRNA5_Rv	aaacTTCGTGGGTGACAGTAGGTGC
Bcor_gRNA1_Fw	caccGATGAGGCCGAATCCAACGA		Bcor_gRNA1_Rv	aaacTCGTTGGATTCGGCCTCATC
Bcor_gRNA2_Fw	caccGACTGGGCAATACCGCAACAG		Bcor_gRNA2_Rv	aaacCTGTTGCGGTATTGCCCAGTC
Bcor_gRNA3_Fw	caccGTGCTTGTGGAACTCGGAGT		Bcor_gRNA3_Rv	aaacACTCCGAGTTCCACAAGCAC
Bcor_gRNA4_Fw	caccGCAGACACTAAAACTGATGCA		Bcor_gRNA4_Rv	aaacTGCATCAGTTTTAGTGTCTGC
Bcor_gRNA5_Fw	caccGCTATATACAAAAcaccGCCT		Bcor_gRNA5_Rv	aaacAGGCGGTGTTTTGTATATAGC
Cnot3_gRNA1_Fw	caccGGCTCAGGGAATAACTCGGG		Cnot3_gRNA1_Rv	aaacCCCGAGTTATTCCCTGAGCC
Cnot3_gRNA2_Fw	caccGTGGTCTCCAGCATACGAACA		Cnot3_gRNA2_Rv	aaacTGTTCGTATGCTGGAGACCAC
Cnot3_gRNA3_Fw	caccGCAAAACCAAAGCGTATAGCA		Cnot3_gRNA3_Rv	aaacTGCTATACGCTTTGGTTTTGC
Cnot3_gRNA4_Fw	caccGATTCGTTCTCTTCAAAGTCG		Cnot3_gRNA4_Rv	aaacCGACTTTGAAGAGAACGAATC
Cnot3_gRNA5_Fw	caccGCCAGCTCCCAGCCACAACTC		Cnot3_gRNA5_Rv	aaacGAGTTGTGGCTGGGAGCTGGC
Crebbp_gRNA1_Fw	caccGCATACTCGAGATATCCGATG		Crebbp_gRNA1_Rv	aaacCATCGGATATCTCGAGTATGC
Crebbp_gRNA2_Fw	caccGTAATGAATCAGGCTCAACAA		Crebbp_gRNA2_Rv	aaacTTGTTGAGCCTGATTCATTAC
Crebbp_gRNA3_Fw	caccGAGGTCACGTTTACATAAGCA		Crebbp_gRNA3_Rv	aaacTGCTTATGTaaacGTGACCTC
Crebbp_gRNA4_Fw	caccGTCAAACGAAAGCTGGACACA		Crebbp_gRNA4_Rv	aaacTGTGTCCAGCTTTCGTTTGAC
Crebbp_gRNA5_Fw	caccGTGAACCTACTGAATCCAAGG		Crebbp_gRNA5_Rv	aaacCCTTGGATTCAGTAGGTTCAC
Ctcf_gRNA1_Fw	caccGCGATCCAAATTTGAACGCCG		Ctcf_gRNA1_Rv	aaacCGGCGTTCAAATTTGGATCGC
Ctcf_gRNA2_Fw	caccGTTTGCCTGAAGGATTTCAGG		Ctcf_gRNA2_Rv	aaacCCTGAAATCCTTCAGGCaaac
Ctcf_gRNA3_Fw	caccGATATGAGAACCCATTCAGGT		Ctcf_gRNA3_Rv	aaacACCTGAATGGGTTCTCATATC
Ctcf_gRNA4_Fw	caccGCAGCATTCCTATATTGAACA		Ctcf_gRNA4_Rv	aaacTGTTCAATATAGGAATGCTGC
Ctcf_gRNA5_Fw	caccGAGGAACAGCCCATTAACAT		Ctcf_gRNA5_Rv	aaacATGTTAATGGGCTGTTCCTC
Dnm2_gRNA1_Fw	caccGATCAGGAATTGTcaccCGG		Dnm2_gRNA1_Rv	aaacCCGGGTGACAATTCCTGATC
Dnm2_gRNA2_Fw	caccGTAGGTGGTGACAATTCGCT		Dnm2_gRNA2_Rv	aaacAGCGAATTGTCACCACCTAC
Dnm2_gRNA3_Fw	caccGTATGCTATTAAGAACATCCA		Dnm2_gRNA3_Rv	aaacTGGATGTTCTTAATAGCATAC
Dnm2_gRNA4_Fw	caccGTGATGAcaccGATGGTCCGT		Dnm2_gRNA4_Rv	aaacACGGACCATCGGTGTCATCAC
Dnm2_gRNA5_Fw	caccGATGCCTGGGAGGTCGATGA		Dnm2_gRNA5_Rv	aaacTCATCGACCTCCCAGGCATC
Dnmt3a_gRNA1_Fw	caccGATCATTGATGAGCGCACAA		Dnmt3a_gRNA1_Rv	aaacTTGTGCGCTCATCAATGATC
Dnmt3a_gRNA2_Fw	caccGCTTACCAGTATGACGACGAT		Dnmt3a_gRNA2_Rv	aaacATCGTCGTCATACTGGTAAGC
Dnmt3a_gRNA3_Fw	caccGCCCTGGAACTGCTACATGTG		Dnmt3a_gRNA3_Rv	aaacCACATGTAGCAGTTCCAGGGC
Dnmt3a_gRNA4_Fw	caccGCGGAGTGAACCCCAACCTG		Dnmt3a_gRNA4_Rv	aaacCAGGTTGGGGTTCACTCCGC
Dnmt3a_gRNA5_Fw	caccGCAGGCCGAATTGTGTCTTGG		Dnmt3a_gRNA5_Rv	aaacCCAAGACACAATTCGGCCTGC
Eed_gRNA1_Fw	caccGTTATACGAATGCCATTCACA		Eed_gRNA1_Rv	aaacTGTGAATGGCATTCGTATAAC
Eed_gRNA2_Fw	caccGGTGAAAAAATAATGTCCTG		Eed_gRNA2_Rv	aaacCAGGACATTATTTTTTCACC
Eed_gRNA3_Fw	caccGCAGCAACTGCTAATAGAGGG		Eed_gRNA3_Rv	aaacCCCTCTATTAGCAGTTGCTGC
Eed_gRNA4_Fw	caccGACTCTTGTGGCAATATTCGG		Eed_gRNA4_Rv	aaacCCGAATATTGCCACAAGAGTC
Eed_gRNA5_Fw	caccGACAAATACGCCAAATGcacc		Eed_gRNA5_Rv	aaacGGTGCATTTGGCGTATTTGTC
Ep300_gRNA1_Fw	caccGTGTAGTAAGTAGCATCACGG		Ep300_gRNA1_Rv	aaacCCGTGATGCTACTTACTACAC
Ep300_gRNA2_Fw	caccGAATGGTCTGAGAATTCACTT		Ep300_gRNA2_Rv	aaacAAGTGAATTCTCAGACCATTC
Ep300_gRNA3_Fw	caccGGAAGAAATGAACACTATCG		Ep300_gRNA3_Rv	aaacCGATAGTGTTCATTTCTTCC
Ep300_gRNA4_Fw	caccGCCTGACCCGTCTATGATCCG		Ep300_gRNA4_Rv	aaacCGGATCATAGACGGGTCAGGC
Ep300_gRNA5_Fw	caccGTGCTCCAGAACCCATTCCTG		Ep300_gRNA5_Rv	aaacCAGGAATGGGTTCTGGAGCAC
Etv6_gRNA1_Fw	caccGAAGCGGAGTCGAGGAACGG		Etv6_gRNA1_Rv	aaacCCGTTCCTCGACTCCGCTTC
Etv6_gRNA2_Fw	caccGCAGAGATGACGTAGCCCAG		Etv6_gRNA2_Rv	aaacCTGGGCTACGTCATCTCTGC
Etv6_gRNA3_Fw	caccGCTGAATGAGGAGATCGGTAG		Etv6_gRNA3_Rv	aaacCTACCGATCTCCTCATTCAGC
Etv6_gRNA4_Fw	caccGCGATGTAAGAGTTCGATGG		Etv6_gRNA4_Rv	aaacCCATCGAACTCTTACATCGC
Etv6_gRNA5_Fw	caccGCGACAGGAGACACTGACAGG		Etv6_gRNA5_Rv	aaacCCTGTCAGTGTCTCCTGTCGC
Ezh2_gRNA1_Fw	caccGTATCGTAGTAAGTACCAATG		Ezh2_gRNA1_Rv	aaacCATTGGTACTTACTACGATAC
Ezh2_gRNA2_Fw	caccGAGAGTACATTATAGGcaccG		Ezh2_gRNA2_Rv	aaacCGGTGCCTATAATGTACTCTC
Ezh2_gRNA3_Fw	caccGAGAcaccACCTAAACGCCCA		Ezh2_gRNA3_Rv	aaacTGGGCGTTTAGGTGGTGTCTC
Ezh2_gRNA4_Fw	caccGCAAcaccCAACACATATAAG		Ezh2_gRNA4_Rv	aaacCTTATATGTGTTGGGTGTTGC
Ezh2_gRNA5_Fw	caccGTTATCAGCAGGAAATTTCCG		Ezh2_gRNA5_Rv	aaacCGGAAATTTCCTGCTGATAAC
Fbxw7_gRNA1_Fw	caccGTATGTCACAGATTCTAACG		Fbxw7_gRNA1_Rv	aaacCGTTAGAATCTGTGACATAC
Fbxw7_gRNA2_Fw	caccGTGTTGCTGAACATGGTACA		Fbxw7_gRNA2_Rv	aaacTGTACCATGTTCAGCAACAC
Fbxw7_gRNA3_Fw	caccGACGTTAGTGGGACATACAGG		Fbxw7_gRNA3_Rv	aaacCCTGTATGTCCCACTAACGTC
Fbxw7_gRNA4_Fw	caccGACTGTAGGCATGTGATCACA		Fbxw7_gRNA4_Rv	aaacTGTGATCACATGCCTACAGTC
Fbxw7_gRNA5_Fw	caccGTGATATACGCACTCTTCCAT		Fbxw7_gRNA5_Rv	aaacATGGAAGAGTGCGTATATCAC
Gata2_gRNA1_Fw	caccGCCTGGGCTGTGCAACAAGTG		Gata2_gRNA1_Rv	aaacCACTTGTTGCACAGCCCAGGC
Gata2_gRNA2_Fw	caccGGCCGGGAGTGTGTCAACTG		Gata2_gRNA2_Rv	aaacCAGTTGACACACTCCCGGCC
Gata2_gRNA3_Fw	caccGTTCAACCATCTCGACTCGCA		Gata2_gRNA3_Rv	aaacTGCGAGTCGAGATGGTTGAAC
Gata2_gRNA4_Fw	caccGATGTAGTTATGCGCCAGGCC		Gata2_gRNA4_Rv	aaacGGCCTGGCGCATAACTACATC
Gata2_gRNA5_Fw	caccGCAGGGGGTAGTGTAGCCCG		Gata2_gRNA5_Rv	aaacCGGGCTACACTACCCCCTGC
Gata3_gRNA1_Fw	caccGAGGTATCCTCCGACCcaccA		Gata3_gRNA1_Rv	aaacTGGTGGGTCGGAGGATACCTC
Gata3_gRNA2_Fw	caccGCCTCGACTTACATCCGAACC		Gata3_gRNA2_Rv	aaacGGTTCGGATGTAAGTCGAGGC
Gata3_gRNA3_Fw	caccGGAAGCTCAGTATCCGCTGA		Gata3_gRNA3_Rv	aaacTCAGCGGATACTGAGCTTCC
Gata3_gRNA4_Fw	caccGCCGGAGGGTAAACGGACAG		Gata3_gRNA4_Rv	aaacCTGTCCGTTTACCCTCCGGC
Gata3_gRNA5_Fw	caccGACCATCTCGCCGCCACAGTG		Gata3_gRNA5_Rv	aaacCACTGTGGCGGCGAGATGGTC
Huwe1_gRNA1_Fw	caccGCAAACTACAGCTATACCGT		Huwe1_gRNA1_Rv	aaacACGGTATAGCTGTAGTTTGC
Huwe1_gRNA2_Fw	caccGACTGTTGAATACCAGTACGA		Huwe1_gRNA2_Rv	aaacTCGTACTGGTATTCAACAGTC
Huwe1_gRNA3_Fw	caccGCATGACGTACCATCAATGGG		Huwe1_gRNA3_Rv	aaacCCCATTGATGGTACGTCATGC
Huwe1_gRNA4_Fw	caccGTTAAGGATGTAATCCATGAG		Huwe1_gRNA4_Rv	aaacCTCATGGATTACATCCTTAAC
Huwe1_gRNA5_Fw	caccGATAGTATGACGAAGAGTACA		Huwe1_gRNA5_Rv	aaacTGTACTCTTCGTCATACTATC
Idh1_gRNA1_Fw	caccGCCCAGCCTGTCACTAGCCGG		Idh1_gRNA1_Rv	aaacCCGGCTAGTGACAGGCTGGGC
Idh1_gRNA2_Fw	caccGAATTCAAGTTGAAACAAATG		Idh1_gRNA2_Rv	aaacCATTTGTTTCAACTTGAATTC
Idh1_gRNA3_Fw	caccGGCTATAAAGAAATACAACG		Idh1_gRNA3_Rv	aaacCGTTGTATTTCTTTATAGCC
Idh1_gRNA4_Fw	caccGCAAGCTATGAAGTCCGAGGG		Idh1_gRNA4_Rv	aaacCCCTCGGACTTCATAGCTTGC
Idh1_gRNA5_Fw	caccGAACTCAGAAGGTGACATACA		Idh1_gRNA5_Rv	aaacTGTATGTCACCTTCTGAGTTC
Ikzf1_gRNA1_Fw	caccGACcaccTCGGAGCTACCGGG		Ikzf1_gRNA1_Rv	aaacCCCGGTAGCTCCGAGGTGGTC
Ikzf1_gRNA2_Fw	caccGAGGTAGTGGACAGGTCCTCA		Ikzf1_gRNA2_Rv	aaacTGAGGACCTGTCCACTACCTC
Ikzf1_gRNA3_Fw	caccGAAAATGAATGGCTCCCACA		Ikzf1_gRNA3_Rv	aaacTGTGGGAGCCATTCATTTTC
Ikzf1_gRNA4_Fw	caccGAGAAACTAACCACAACGAGA		Ikzf1_gRNA4_Rv	aaacTCTCGTTGTGGTTAGTTTCTC
Ikzf1_gRNA5_Fw	caccGTTGGTAAGCCTCACAAATG		Ikzf1_gRNA5_Rv	aaacCATTTGTGAGGCTTACCAAC
Kdm6a_gRNA1_Fw	caccGTGTGCTGTACAATTGGACCA		Kdm6a_gRNA1_Rv	aaacTGGTCCAATTGTACAGCACAC
Kdm6a_gRNA2_Fw	caccGGCTATTAAAGCATTTCAGG		Kdm6a_gRNA2_Rv	aaacCCTGAAATGCTTTAATAGCC
Kdm6a_gRNA3_Fw	caccGCTAGCAATTCAGTAACACAG		Kdm6a_gRNA3_Rv	aaacCTGTGTTACTGAATTGCTAGC
Kdm6a_gRNA4_Fw	caccGTCCAGCACAGAAACTAATGC		Kdm6a_gRNA4_Rv	aaacGCATTAGTTTCTGTGCTGGAC
Kdm6a_gRNA5_Fw	caccGTTCGTAGCAGCGAACAGCCT		Kdm6a_gRNA5_Rv	aaacAGGCTGTTCGCTGCTACGAAC
Kmt2c_gRNA1_Fw	caccGAGAACCATTATTAGTAAACG		Kmt2c_gRNA1_Rv	aaacCGTTTACTAATAATGGTTCTC
Kmt2c_gRNA2_Fw	caccGAAAAGGCCCATTACCCAATG		Kmt2c_gRNA2_Rv	aaacCATTGGGTAATGGGCCTTTTC
Kmt2c_gRNA3_Fw	caccGGTGAAATGGATGATAGTCG		Kmt2c_gRNA3_Rv	aaacCGACTATCATCCATTTCACC
Kmt2c_gRNA4_Fw	caccGTTCCGAAAGACTCAGAATG		Kmt2c_gRNA4_Rv	aaacCATTCTGAGTCTTTCGGAAC
Kmt2c_gRNA5_Fw	caccGTGGTTACTCCAAGCCCCCTA		Kmt2c_gRNA5_Rv	aaacTAGGGGGCTTGGAGTAACCAC
Kmt2d_gRNA1_Fw	caccGTGGGTACCACAACTCGACCT		Kmt2d_gRNA1_Rv	aaacAGGTCGAGTTGTGGTACCCAC
Kmt2d_gRNA2_Fw	caccGAAATGGCTGTTGATCCCATG		Kmt2d_gRNA2_Rv	aaacCATGGGATCAACAGCCATTTC
Kmt2d_gRNA3_Fw	caccGTTcaccATTAATACCCCCA		Kmt2d_gRNA3_Rv	aaacTGGGGGTATTAATGGTGAAC
Kmt2d_gRNA4_Fw	caccGTCGGGCCGGACTAACATCCG		Kmt2d_gRNA4_Rv	aaacCGGATGTTAGTCCGGCCCGAC
Kmt2d_gRNA5_Fw	caccGTGTGACCTCTATGCAACCCA		Kmt2d_gRNA5_Rv	aaacTGGGTTGCATAGAGGTCACAC
Med12_gRNA1_Fw	caccGCTGTTGGAAAACCTCGATTG		Med12_gRNA1_Rv	aaacCAATCGAGGTTTTCCAACAGC
Med12_gRNA2_Fw	caccGAGGACCGGATTCCAACAGT		Med12_gRNA2_Rv	aaacACTGTTGGAATCCGGTCCTC
Med12_gRNA3_Fw	caccGTGAAGGTTCTGAATCGCAAG		Med12_gRNA3_Rv	aaacCTTGCGATTCAGAACCTTCAC
Med12_gRNA4_Fw	caccGAGCCGGTCAGCTCTGCACAA		Med12_gRNA4_Rv	aaacTTGTGCAGAGCTGACCGGCTC
Med12_gRNA5_Fw	caccGCATATCTTTACAGTACTCAG		Med12_gRNA5_Rv	aaacCTGAGTACTGTAAAGATATGC
Mga_gRNA1_Fw	caccGACTGGAATCAACAACAATCG		Mga_gRNA1_Rv	aaacCGATTGTTGTTGATTCCAGTC
Mga_gRNA2_Fw	caccGTGACCTCTGATGTACATACG		Mga_gRNA2_Rv	aaacCGTATGTACATCAGAGGTCAC
Mga_gRNA3_Fw	caccGCAAAACTACCTGACTGCAG		Mga_gRNA3_Rv	aaacCTGCAGTCAGGTAGTTTTGC
Mga_gRNA4_Fw	caccGAACAAACAGACAACACTCAG		Mga_gRNA4_Rv	aaacCTGAGTGTTGTCTGTTTGTTC
Mga_gRNA5_Fw	caccGCTTCATGACCCCTTAACAC		Mga_gRNA5_Rv	aaacGTGTTAAGGGGTCATGAAGC
Ncor1_gRNA1_Fw	caccGGCTTCACGGAAACCCCGTG		Ncor1_gRNA1_Rv	aaacCACGGGGTTTCCGTGAAGCC
Ncor1_gRNA2_Fw	caccGATATGCCGAGCATTACCCAG		Ncor1_gRNA2_Rv	aaacCTGGGTAATGCTCGGCATATC
Ncor1_gRNA3_Fw	caccGGGCCTAGCAAACTACCCCG		Ncor1_gRNA3_Rv	aaacCGGGGTAGTTTGCTAGGCCC
Ncor1_gRNA4_Fw	caccGCCCTACCAAAGCCGACTCCG		Ncor1_gRNA4_Rv	aaacCGGAGTCGGCTTTGGTAGGGC
Ncor1_gRNA5_Fw	caccGCAGAGAGATAGACCCCACGG		Ncor1_gRNA5_Rv	aaacCCGTGGGGTCTATCTCTCTGC
Nf1_gRNA1_Fw	caccGGAAACGTGGCATGTCTCGG		Nf1_gRNA1_Rv	aaacCCGAGACATGCCACGTTTCC
Nf1_gRNA2_Fw	caccGACTCTAACCATTGCAAACCA		Nf1_gRNA2_Rv	aaacTGGTTTGCAATGGTTAGAGTC
Nf1_gRNA3_Fw	caccGTGTGTAACCACGAGAAAGTG		Nf1_gRNA3_Rv	aaacCACTTTCTCGTGGTTACACAC
Nf1_gRNA4_Fw	caccGTGCATGAATCAGTTTcaccA		Nf1_gRNA4_Rv	aaacTGGTGaaacTGATTCATGCAC
Nf1_gRNA5_Fw	caccGCGATTGCTAGGCCCAGTAT		Nf1_gRNA5_Rv	aaacATACTGGGCCTAGCAATCGC
Notch3_gRNA1_Fw	caccGGCGTTCAGTGCCTACACAA		Notch3_gRNA1_Rv	aaacTTGTGTAGGCACTGAACGCC
Notch3_gRNA2_Fw	caccGTTGATCTCCACGTTGCAGAG		Notch3_gRNA2_Rv	aaacCTCTGCAACGTGGAGATCAAC
Notch3_gRNA3_Fw	caccGGACATCGGTGTCTCAATGG		Notch3_gRNA3_Rv	aaacCCATTGAGACACCGATGTCC
Notch3_gRNA4_Fw	caccGCGGAAGGGGTCTCACAACGC		Notch3_gRNA4_Rv	aaacGCGTTGTGAGACCCCTTCCGC
Notch3_gRNA5_Fw	caccGACCGACCCAAATGTTCACAG		Notch3_gRNA5_Rv	aaacCTGTGAACATTTGGGTCGGTC
Pbrm1_gRNA1_Fw	caccGCAATGCCAGGCACTACAATG		Pbrm1_gRNA1_Rv	aaacCATTGTAGTGCCTGGCATTGC
Pbrm1_gRNA2_Fw	caccGTGTCTATGTTGAACCTGCGG		Pbrm1_gRNA2_Rv	aaacCCGCAGGTTCAACATAGACAC
Pbrm1_gRNA3_Fw	caccGAATAAAAGAGCAGTCCAAGG		Pbrm1_gRNA3_Rv	aaacCCTTGGACTGCTCTTTTATTC
Pbrm1_gRNA4_Fw	caccGACAGATTCCGAAATATATG		Pbrm1_gRNA4_Rv	aaacCATATATTTCGGAATCTGTC
Pbrm1_gRNA5_Fw	caccGACAAGCAGCTTTATACTCAG		Pbrm1_gRNA5_Rv	aaacCTGAGTATAAAGCTGCTTGTC
Phf6_gRNA1_Fw	caccGCTTTATCATGCAATGCACAG		Phf6_gRNA1_Rv	aaacCTGTGCATTGCATGATAAAGC
Phf6_gRNA2_Fw	caccGTTGTAAGTCAAATAGAGACA		Phf6_gRNA2_Rv	aaacTGTCTCTATTTGACTTACAAC
Phf6_gRNA3_Fw	caccGGAGCAGTCCTAATGATACC		Phf6_gRNA3_Rv	aaacGGTATCATTAGGACTGCTCC
Phf6_gRNA4_Fw	caccGAAAACTGCACATAACTCGGA		Phf6_gRNA4_Rv	aaacTCCGAGTTATGTGCAGTTTTC
Phf6_gRNA5_Fw	caccGTGACAAAGAGAACACATCTA		Phf6_gRNA5_Rv	aaacTAGATGTGTTCTCTTTGTCAC
Phip_gRNA1_Fw	caccGATGATGCAAAGTATAGACGA		Phip_gRNA1_Rv	aaacTCGTCTATACTTTGCATCATC
Phip_gRNA2_Fw	caccGAAATTCAACTcaccAATGCT		Phip_gRNA2_Rv	aaacAGCATTGGTGAGTTGAATTTC
Phip_gRNA3_Fw	caccGATGGCCTAACGTTAGAAGAG		Phip_gRNA3_Rv	aaacCTCTTCTAACGTTAGGCCATC
Phip_gRNA4_Fw	caccGAATTTGGCAGTTTAAACGA		Phip_gRNA4_Rv	aaacTCGTTTaaacTGCCAAATTC
Phip_gRNA5_Fw	caccGTGGCCAAATCGAAGGTGTA		Phip_gRNA5_Rv	aaacTACACCTTCGATTTGGCCAC
Pik3r1_gRNA1_Fw	caccGAAGCTGTCGTAATTCTGCA		Pik3r1_gRNA1_Rv	aaacTGCAGAATTACGACAGCTTC
Pik3r1_gRNA2_Fw	caccGCGATTACACTCTTACACTA		Pik3r1_gRNA2_Rv	aaacTAGTGTAAGAGTGTAATCGC
Pik3r1_gRNA3_Fw	caccGGAATATGATAGATTATATG		Pik3r1_gRNA3_Rv	aaacCATATAATCTATCATATTCC
Pik3r1_gRNA4_Fw	caccGTGGCTACAATGAAACCACTG		Pik3r1_gRNA4_Rv	aaacCAGTGGTTTCATTGTAGCCAC
Pik3r1_gRNA5_Fw	caccGAGCTCAGTACAACCCCAAGC		Pik3r1_gRNA5_Rv	aaacGCTTGGGGTTGTACTGAGCTC
Ptpn2_gRNA1_Fw	caccGAAGAAGTTACATCTTAACAC		Ptpn2_gRNA1_Rv	aaacGTGTTAAGATGTAACTTCTTC
Ptpn2_gRNA2_Fw	caccGTGCAGTGATCCATTGCAGTG		Ptpn2_gRNA2_Rv	aaacCACTGCAATGGATCACTGCAC
Ptpn2_gRNA3_Fw	caccGCACTCTATGAGGATAGTCAT		Ptpn2_gRNA3_Rv	aaacATGACTATCCTCATAGAGTGC
Ptpn2_gRNA4_Fw	caccGGTATAATGGAAGTGAGATA		Ptpn2_gRNA4_Rv	aaacTATCTCACTTCCATTATACC
Ptpn2_gRNA5_Fw	caccGATGTGCACAGTACTGGCCAA		Ptpn2_gRNA5_Rv	aaacTTGGCCAGTACTGTGCACATC
Setd2_gRNA1_Fw	caccGCATTCGCTTAATATCCCGG		Setd2_gRNA1_Rv	aaacCCGGGATATTAAGCGAATGC
Setd2_gRNA2_Fw	caccGTGGAATATGATGACCCCCGT		Setd2_gRNA2_Rv	aaacACGGGGGTCATCATATTCCAC
Setd2_gRNA3_Fw	caccGTTGCTTATGATCGAATCCAA		Setd2_gRNA3_Rv	aaacTTGGATTCGATCATAAGCAAC
Setd2_gRNA4_Fw	caccGGTATGTATCTTCCCGATGT		Setd2_gRNA4_Rv	aaacACATCGGGAAGATACATACC
Setd2_gRNA5_Fw	caccGATAATAGGGAGCCGACAGAC		Setd2_gRNA5_Rv	aaacGTCTGTCGGCTCCCTATTATC
Smarca4_gRNA1_Fw	caccGAGGTATGTGATGAGCGCGA		Smarca4_gRNA1_Rv	aaacTCGCGCTCATCACATACCTC
Smarca4_gRNA2_Fw	caccGCCCTGTGAAGGTGATCCACG		Smarca4_gRNA2_Rv	aaacCGTGGATCACCTTCACAGGGC
Smarca4_gRNA3_Fw	caccGCTGCAGCACCTTCGAACAG		Smarca4_gRNA3_Rv	aaacCTGTTCGAAGGTGCTGCAGC
Smarca4_gRNA4_Fw	caccGCATGTTCAGAGCCGCCGAG		Smarca4_gRNA4_Rv	aaacCTCGGCGGCTCTGAACATGC
Smarca4_gRNA5_Fw	caccGCAAACGTCAGTCACTACGGG		Smarca4_gRNA5_Rv	aaacCCCGTAGTGACTGACGTTTGC
Tet2_gRNA1_Fw	caccGGTATATCGGAGATCGAGTG		Tet2_gRNA1_Rv	aaacCACTCGATCTCCGATATACC
Tet2_gRNA2_Fw	caccGCGAAGCTTGCAAATTCCGGT		Tet2_gRNA2_Rv	aaacACCGGAATTTGCAAGCTTCGC
Tet2_gRNA3_Fw	caccGCTCACAATAATACCCAAGGG		Tet2_gRNA3_Rv	aaacCCCTTGGGTATTATTGTGAGC
Tet2_gRNA4_Fw	caccGTGATAACCGTTGAGTCTCTG		Tet2_gRNA4_Rv	aaacCAGAGACTCAACGGTTATCAC
Tet2_gRNA5_Fw	caccGAGAAGCACGCTGCCTTAAGG		Tet2_gRNA5_Rv	aaacCCTTAAGGCAGCGTGCTTCTC
Tp53_gRNA1_Fw	caccGAAGTCACAGCACATGACGG		Tp53_gRNA1_Rv	aaacCCGTCATGTGCTGTGACTTC
Tp53_gRNA2_Fw	caccGAACAGATCGTCCATGCAGTG		Tp53_gRNA2_Rv	aaacCACTGCATGGACGATCTGTTC
Tp53_gRNA3_Fw	caccGTGTAATAGCTCCTGCATGG		Tp53_gRNA3_Rv	aaacCCATGCAGGAGCTATTACAC
Tp53_gRNA4_Fw	caccGGTACCTTATGAGCcaccCG		Tp53_gRNA4_Rv	aaacCGGGTGGCTCATAAGGTACC
Tp53_gRNA5_Fw	caccGTCcaccCGGATAAGATGCTG		Tp53_gRNA5_Rv	aaacCAGCATCTTATCCGGGTGGAC
Trrap_gRNA1_Fw	caccGACGTCGTGTAAAGcaccTGG		Trrap_gRNA1_Rv	aaacCCAGGTGCTTTACACGACGTC
Trrap_gRNA2_Fw	caccGTGAAACGGCGCGTCTACGAA		Trrap_gRNA2_Rv	aaacTTCGTAGACGCGCCGTTTCAC
Trrap_gRNA3_Fw	caccGAACCAAATCGTGGGTCACG		Trrap_gRNA3_Rv	aaacCGTGACCCACGATTTGGTTC
Trrap_gRNA4_Fw	caccGCTGGACTAGGAAGATCATCG		Trrap_gRNA4_Rv	aaacCGATGATCTTCCTAGTCCAGC
Trrap_gRNA5_Fw	caccGTGTTACAGGCACATCAAGCG		Trrap_gRNA5_Rv	aaacCGCTTGATGTGCCTGTAACAC
Tspyl2_gRNA1_Fw	caccGCACTCAGGGTGAAATACGCG		Tspyl2_gRNA1_Rv	aaacCGCGTATTTCACCCTGAGTGC
Tspyl2_gRNA2_Fw	caccGCTCATTCTACCCCAATACGT		Tspyl2_gRNA2_Rv	aaacACGTATTGGGGTAGAATGAGC
Tspyl2_gRNA3_Fw	caccGAGCCCATGGAGATATGTCTG		Tspyl2_gRNA3_Rv	aaacCAGACATATCTCCATGGGCTC
Tspyl2_gRNA4_Fw	caccGAGCGTACTGGGTTAACCCAC		Tspyl2_gRNA4_Rv	aaacGTGGGTTAACCCAGTACGCTC
Tspyl2_gRNA5_Fw	caccGGAGGAGGCTATCATAATAG		Tspyl2_gRNA5_Rv	aaacCTATTATGATAGCCTCCTCC
Zbtb7a_gRNA1_Fw	caccGAGTCGCGAACCGACGACAA		Zbtb7a_gRNA1_Rv	aaacTTGTCGTCGGTTCGCGACTC
Zbtb7a_gRNA2_Fw	caccGCCATAGTGGCCGTTCTGTG		Zbtb7a_gRNA2_Rv	aaacCACAGAACGGCCACTATGGC
Zbtb7a_gRNA3_Fw	caccGCTGGAGCGTCAGATTCTGG		Zbtb7a_gRNA3_Rv	aaacCCAGAATCTGACGCTCCAGC
Zbtb7a_gRNA4_Fw	caccGCTTCAAGAAGCTGTTCACGT		Zbtb7a_gRNA4_Rv	aaacACGTGAACAGCTTCTTGAAGC
Zbtb7a_gRNA5_Fw	caccGGCTATTCATGGGGTTACTG		Zbtb7a_gRNA5_Rv	aaacCAGTAACCCCATGAATAGCC
Zmym3_gRNA1_Fw	caccGCGAGAAGCTTCGATTCAGTG		Zmym3_gRNA1_Rv	aaacCACTGAATCGAAGCTTCTCGC
Zmym3_gRNA2_Fw	caccGCAGTAGGGGTACATACCCC		Zmym3_gRNA2_Rv	aaacGGGGTATGTACCCCTACTGC
Zmym3_gRNA3_Fw	caccGTGCGCTCAAGTATGGCACAA		Zmym3_gRNA3_Rv	aaacTTGTGCCATACTTGAGCGCAC
Zmym3_gRNA4_Fw	caccGATGGGCAGCACAATCACTTG		Zmym3_gRNA4_Rv	aaacCAAGTGATTGTGCTGCCCATC
Zmym3_gRNA5_Fw	caccGTTGCAACACAACGTGCTTGG		Zmym3_gRNA5_Rv	aaacCCAAGCACGTTGTGTTGCAAC
Tlx1_gRNA1_Fw	caccGAGTAACCGCAGATACACAA		Tlx1_gRNA1_Rv	aaacTTGTGTATCTGCGGTTACTC	negative control
Tlx1_gRNA2_Fw	caccGCTCAACAGCCCCGACCAGGG		Tlx1_gRNA2_Rv	aaacCCCTGGTCGGGGCTGTTGAGC	negative control
Tlx1_gRNA3_Fw	caccGAGGCGCGTGAAGGATGTGCG		Tlx1_gRNA3_Rv	aaacCGCACATCCTTCACGCGCCTC	negative control
Tlx1_gRNA4_Fw	caccGCAGGCACAGAGGGTACTGT		Tlx1_gRNA4_Rv	aaacACAGTACCCTCTGTGCCTGC	negative control
Tlx1_gRNA5_Fw	caccGGAGGCGCCTACACTTACGG		Tlx1_gRNA5_Rv	aaacCCGTAAGTGTAGGCGCCTCC	negative control
Tlx3_gRNA1_Fw	caccGACCCGGGAAAAGGACGTGCG		Tlx3_gRNA1_Rv	aaacCGCACGTCCTTTTCCCGGGTC	negative control
Tlx3_gRNA2_Fw	caccGTGAAGCGGTCCTTTACAAAG		Tlx3_gRNA2_Rv	aaacCTTTGTAAAGGACCGCTTCAC	negative control
Tlx3_gRNA3_Fw	caccGTTACAGTGTCAACCTAAGC T		Tlx3_gRNA3_Rv	aaacAGCTTAGGTTGACACTGTAAC	negative control
gLuc3 Fw	caccAAGAGATACGCCCTGGTTCC		gLuc3 Rev	aaacGGAACCAGGGCGTATCTCTT	negative control
gLuc2 Fw	caccCGCTGGAGAGCAACTGCATA		gLuc2 Rev	aaacTATGCAGTTGCTCTCCAGCG	negative control
gLuc1 Fw	caccGCTGTTTCTGAGGAGCCTTCAGG		gLuc1 Rev	aaacCCTGAAGGCTCCTCAGAAACAGC	negative control
Il7r_gRNA1_Fw	caccGGGAGACTAGGCCATACGAC		Il7r_gRNA1_Rv	aaacGTCGTATGGCCTAGTCTCCC	Positive control
Il7r_gRNA2_Fw	caccGCAGAACCCAAGAATCAAGGT		Il7r_gRNA2_Rv	aaacACCTTGATTCTTGGGTTCTGC	Positive control
Il7r_gRNA3_Fw	caccGCTGGAATTTCAAATATGGTG		Il7r_gRNA3_Rv	aaacCACCATATTTGAAATTCCAGC	Positive control
Il7r_gRNA4_Fw	caccGTGGAATAAAGATACATGCT		Il7r_gRNA4_Rv	aaacAGCATGTATCTTTATTCCAC	Positive control
Il7r_gRNA5_Fw	caccGAGACCTAGAAGATGCAGACG		Il7r_gRNA5_Rv	aaacCGTCTGCATCTTCTAGGTCTC	Positive control
Notch1_gRNA1_Fw	caccGATAGGCAGGTGGGACTACGT		Notch1_gRNA1_Rv	aaacACGTAGTCCCACCTGCCTATC	Positive control
Notch1_gRNA2_Fw	caccGACCTGCACTGACTATCTCGG		Notch1_gRNA2_Rv	aaacCCGAGATAGTCAGTGCAGGTC	Positive control
Notch1_gRNA3_Fw	caccGATATACATACCCGTCCACTC		Notch1_gRNA3_Rv	aaacGAGTGGACGGGTATGTATATC	Positive control
Notch1_gRNA4_Fw	caccGTGCTGAGCATGTACCCGAG		Notch1_gRNA4_Rv	aaacCTCGGGTACATGCTCAGCAC	Positive control
Notch1_gRNA5_Fw	caccGCTTCACAGGTCAAACCTGCG		Notch1_gRNA5_Rv	aaacCGCAGGTTTGACCTGTGAAGC	Positive control
